# Supplementary material for: Endo180 and basement membrane stiffness induce OXPHOS and neoplasia in aging prostate epithelia
Source: Research Square preprint supplement (doi:10.21203/rs.3.rs-4837876/v1), 2024-09-19
Supplement: Supplementary file 1 [file 0972228ba8b880fabc21e8ac.xlsx]

## Sheet: UP (stiff vs native)
Supplemantary data 3. DEGs in Ctrl-acini in stiff-BM versus native-BM
							dt
Gene Name	Ensembl Identifier	Fold change (FC ≥ 2)	Log fold change	p value (p < 0.05)	FDR p value (p < 0.05)
AL109811.3	ENSG00000277726	99.1977	6.63223	0.00595528	0.0229086
RCSD1	ENSG00000198771	27.1935	4.76519	0.000605983	0.00315301
FGF1	ENSG00000113578	26.6436	4.73572	2.7355e-08	5.10444e-07
TRIL	ENSG00000255690	13.8354	3.79029	0.00680106	0.0256981
APCDD1	ENSG00000154856	13.0611	3.7072	8.53725e-06	7.62469e-05
C6orf163	ENSG00000203872	12.8554	3.68431	0.00765836	0.0284527
BBOX1	ENSG00000129151	12.8409	3.68268	0.00027335	0.00157544
UQCRHL	ENSG00000233954	11.9667	3.58096	0.0115428	0.0406719
DNAH6	ENSG00000115423	11.7982	3.5605	0.000155288	0.00096034
SORBS2	ENSG00000154556	11.1755	3.48227	0.00165178	0.00756083
CCDC102B	ENSG00000150636	11.1225	3.47541	3.93821e-08	6.97945e-07
MAP2K6	ENSG00000108984	10.5287	3.39626	1.11022e-16	1.79597e-14
AC004997.1	ENSG00000248751	10.2781	3.3615	0.000276097	0.00158872
LMO1	ENSG00000166407	10.1832	3.34813	0.0107381	0.0382374
ITGA9	ENSG00000144668	9.82229	3.29606	0.00361161	0.0148972
METTL7A	ENSG00000185432	9.60222	3.26337	6.92779e-14	5.79967e-12
NPIPB9	ENSG00000196993	9.48997	3.2464	0.00459315	0.0183308
RBBP8NL	ENSG00000130701	9.40696	3.23373	2.17139e-07	3.1354e-06
TP73	ENSG00000078900	9.24263	3.2083	0	0
STON1	ENSG00000243244	8.80125	3.13771	9.65789e-11	3.58876e-09
IGFBP5	ENSG00000115461	8.66612	3.11539	3.111e-05	0.000235763
AGR2	ENSG00000106541	8.12326	3.02206	1.04361e-14	1.03471e-12
SLC2A12	ENSG00000146411	8.11418	3.02045	1.33951e-07	2.0556e-06
ANGPTL2	ENSG00000136859	8.08494	3.01524	0.00697572	0.026275
RASGEF1B	ENSG00000138670	8.00531	3.00096	0.000409638	0.00223746
VAV3	ENSG00000134215	7.91867	2.98526	0	0
SERPINA3	ENSG00000196136	7.87601	2.97747	0.000979699	0.00482119
C21orf62	ENSG00000205929	7.84874	2.97246	0.0122752	0.0428319
C1QTNF5	ENSG00000223953	7.77142	2.95818	1.71531e-10	5.92579e-09
PLSCR4	ENSG00000114698	7.64798	2.93508	1.66733e-05	0.000136762
ZNF20	ENSG00000132010	7.62369	2.93049	3.08024e-07	4.24545e-06
ANKRD20A4	ENSG00000172014	7.56589	2.91951	0.0029132	0.0123454
MAF	ENSG00000178573	7.49832	2.90657	1.22125e-15	1.57336e-13
HPGD	ENSG00000164120	7.30416	2.86872	2.138e-07	3.09341e-06
ZDHHC11B	ENSG00000206077	7.21895	2.85179	0.00773031	0.0286853
KRT15	ENSG00000171346	7.20118	2.84823	0	0
CLGN	ENSG00000153132	7.1307	2.83404	5.30705e-07	6.8454e-06
SLC30A2	ENSG00000158014	6.87959	2.78232	0.00493189	0.0194732
ATP8A1	ENSG00000124406	6.79901	2.76533	2.44385e-07	3.45689e-06
AC138894.1	ENSG00000261832	6.77642	2.76052	0.000516287	0.00273864
WDR72	ENSG00000166415	6.71708	2.74783	3.9878e-06	3.90166e-05
KCNJ2	ENSG00000123700	6.66035	2.7356	6.28673e-10	1.8786e-08
EPHA7	ENSG00000135333	6.63333	2.72973	0	0
REEP1	ENSG00000068615	6.51681	2.70417	0.000415663	0.00226405
GJA9	ENSG00000131233	6.51601	2.70399	0.00813814	0.0300124
CRISPLD1	ENSG00000121005	6.40984	2.68029	0.000261826	0.0015147
ZNF117	ENSG00000152926	6.37515	2.67246	3.37531e-05	0.000252678
UGT1A3	ENSG00000243135	6.30194	2.6558	0.000243287	0.00142017
SOX2	ENSG00000181449	6.18718	2.62928	7.56258e-07	9.25007e-06
EPHB6	ENSG00000106123	6.16913	2.62507	2.22753e-07	3.19289e-06
CNTNAP2	ENSG00000174469	6.01117	2.58765	6.60163e-06	6.06983e-05
COL6A6	ENSG00000206384	5.98119	2.58043	0.0099894	0.0358622
SESN3	ENSG00000149212	5.90269	2.56137	0	0
STK32A	ENSG00000169302	5.82898	2.54324	1.05249e-13	8.29463e-12
CSRNP3	ENSG00000178662	5.80095	2.53629	0.000337309	0.00188842
KLHL41	ENSG00000239474	5.73598	2.52004	0.00232453	0.0101651
ARHGAP28	ENSG00000088756	5.73429	2.51961	3.17407e-09	7.7164e-08
SLC7A4	ENSG00000099960	5.69996	2.51095	0.00584382	0.0225242
MAFB	ENSG00000204103	5.57115	2.47797	1.23086e-11	5.73911e-10
SOX6	ENSG00000110693	5.56869	2.47734	6.2637e-05	0.000434014
KANTR	ENSG00000232593	5.56446	2.47624	0.0140304	0.0480583
TSPAN11	ENSG00000110900	5.52204	2.4652	0.00177341	0.00803833
SLCO2A1	ENSG00000174640	5.49295	2.45758	3.29289e-08	5.98871e-07
NRG4	ENSG00000169752	5.43392	2.44199	0.0141565	0.0484147
AXIN2	ENSG00000168646	5.38924	2.43008	0.00950972	0.0343464
CAPS2	ENSG00000180881	5.31835	2.41098	0.000546346	0.00287714
MAP2	ENSG00000078018	5.2446	2.39083	2.98039e-12	1.64841e-10
SERPINB13	ENSG00000197641	5.18209	2.37353	1.0353e-07	1.62825e-06
HS3ST6	ENSG00000162040	5.09212	2.34827	0.004921	0.0194409
SLC2A5	ENSG00000142583	5.08829	2.34718	0.0001509	0.000936436
ADAM21	ENSG00000139985	5.07881	2.34449	0.012654	0.0439823
RAB30	ENSG00000137502	5.05244	2.33698	2.10942e-15	2.54968e-13
CADM2	ENSG00000175161	5.02854	2.33014	3.1055e-05	0.00023543
FAM228B	ENSG00000219626	4.97367	2.31431	0.000178143	0.00108239
SCNN1B	ENSG00000168447	4.93842	2.30405	2.27319e-06	2.40333e-05
RNF150	ENSG00000170153	4.91841	2.29819	0	0
WNT4	ENSG00000162552	4.89965	2.29268	3.33287e-08	6.05631e-07
DMGDH	ENSG00000132837	4.83676	2.27404	0.00350502	0.0145266
GIMAP2	ENSG00000106560	4.83368	2.27312	0.00235405	0.010267
TP53INP1	ENSG00000164938	4.83254	2.27278	0	0
SYT12	ENSG00000173227	4.75779	2.25029	2.96685e-09	7.3034e-08
GHR	ENSG00000112964	4.74814	2.24736	9.4191e-05	0.00061992
TRPV4	ENSG00000111199	4.72195	2.23938	1.08255e-08	2.27009e-07
CYP1B1	ENSG00000138061	4.68441	2.22787	0	0
BEND6	ENSG00000151917	4.66511	2.22191	0.000737838	0.00376086
FO681492.1	ENSG00000277758	4.61351	2.20586	0.0126277	0.043905
VIPR1	ENSG00000114812	4.59222	2.19919	0.000136836	0.000858267
FOXO6	ENSG00000204060	4.58787	2.19782	0.000127274	0.000807909
FIBIN	ENSG00000176971	4.57753	2.19457	0.000598536	0.00311804
POU2F3	ENSG00000137709	4.56331	2.19008	0.00756562	0.0281763
TRPV6	ENSG00000165125	4.51428	2.1745	3.89218e-05	0.000285316
BMF	ENSG00000104081	4.49555	2.1685	1.04232e-10	3.83341e-09
TLR1	ENSG00000174125	4.41502	2.14242	0.00129598	0.00616473
KCTD16	ENSG00000183775	4.40636	2.13959	4.32288e-05	0.000313048
SLC38A4	ENSG00000139209	4.39722	2.13659	0.000396657	0.0021765
NEURL1B	ENSG00000214357	4.34931	2.12079	0	0
MXRA5	ENSG00000101825	4.34914	2.12073	0	0
ZNF546	ENSG00000187187	4.2973	2.10343	1.64927e-06	1.82438e-05
PLXDC2	ENSG00000120594	4.29321	2.10206	9.22207e-12	4.46876e-10
SH2D3C	ENSG00000095370	4.29103	2.10132	2.74523e-05	0.000211017
CCDC144A	ENSG00000170160	4.27795	2.09692	2.69473e-05	0.000207506
MT-ATP8	ENSG00000228253	4.22461	2.07882	1.3551e-07	2.07509e-06
MT-ND4L	ENSG00000212907	4.22193	2.0779	1.91298e-07	2.81133e-06
SEMA6D	ENSG00000137872	4.20546	2.07226	8.34627e-08	1.35524e-06
SAMD13	ENSG00000203943	4.17197	2.06073	0.0146826	0.0499677
IKZF2	ENSG00000030419	4.1086	2.03865	0	0
GPR1	ENSG00000183671	4.09259	2.03302	0.0048365	0.0191564
FOXN1	ENSG00000109101	4.07027	2.02512	6.08007e-06	5.63848e-05
DENND2A	ENSG00000146966	4.06223	2.02227	0.00294092	0.0124457
EFCAB13	ENSG00000178852	4.05724	2.0205	0.000418674	0.00227756
CDNF	ENSG00000185267	4.04112	2.01476	0.00215356	0.00949696
EDIL3	ENSG00000164176	4.02468	2.00887	0.000301934	0.00171764
UGT1A7	ENSG00000244122	4.01867	2.00672	0.000540932	0.00285319
TENT5C	ENSG00000183508	4.01424	2.00513	8.88178e-16	1.19432e-13
RAD9B	ENSG00000151164	3.99799	1.99928	4.44059e-06	4.2862e-05
SULF1	ENSG00000137573	3.99645	1.99872	2.34412e-06	2.47224e-05
SLC51A	ENSG00000163959	3.98721	1.99538	0.00116144	0.00559273
OGN	ENSG00000106809	3.96622	1.98776	0.00631479	0.0241019
SOWAHA	ENSG00000198944	3.96418	1.98702	0.00239055	0.0104115
TJP3	ENSG00000105289	3.91239	1.96805	0.000324787	0.00182971
KBTBD3	ENSG00000182359	3.90832	1.96655	3.24964e-08	5.9301e-07
SCNN1G	ENSG00000166828	3.89045	1.95994	2.29563e-11	9.91777e-10
ALDH3A1	ENSG00000108602	3.87752	1.95514	4.77396e-15	5.34957e-13
LRRIQ1	ENSG00000133640	3.87259	1.9533	0.00319083	0.0133718
TLR3	ENSG00000164342	3.86116	1.94904	9.57063e-05	0.000628355
CFAP44	ENSG00000206530	3.83237	1.93824	6.08366e-07	7.63652e-06
AMOT	ENSG00000126016	3.81848	1.933	4.09244e-06	3.98952e-05
RETREG1	ENSG00000154153	3.81395	1.93129	1.26944e-09	3.47923e-08
ZNF396	ENSG00000186496	3.81358	1.93115	0.00373871	0.0153508
FAM47E	ENSG00000189157	3.80454	1.92772	9.67067e-05	0.000633587
SCN8A	ENSG00000196876	3.75748	1.90976	0.00887034	0.0323302
LINC00672	ENSG00000263874	3.75676	1.90949	0.00650165	0.0246925
GGT6	ENSG00000167741	3.75621	1.90928	0.0118493	0.0415613
EFCAB6	ENSG00000186976	3.73235	1.90008	0.00569872	0.0220518
MT-ND6	ENSG00000198695	3.73144	1.89973	3.85223e-06	3.78797e-05
ZBTB16	ENSG00000109906	3.7116	1.89204	1.06581e-14	1.05188e-12
AC008581.2	ENSG00000285000	3.70805	1.89066	0.005867	0.0226013
ZNF596	ENSG00000172748	3.70203	1.88832	1.71962e-05	0.000140515
ACPP	ENSG00000014257	3.70064	1.88778	0.00144766	0.00676067
CXXC5	ENSG00000171604	3.69345	1.88497	9.51039e-12	4.57754e-10
LFNG	ENSG00000106003	3.68476	1.88157	0	0
FBXO32	ENSG00000156804	3.66476	1.87372	9.04049e-07	1.08179e-05
PTCHD4	ENSG00000244694	3.63409	1.86159	0.00380172	0.015568
SPACA6	ENSG00000182310	3.62885	1.85951	0.00397022	0.0161626
CFH	ENSG00000000971	3.62803	1.85919	0.00128995	0.00614013
PRRG4	ENSG00000135378	3.61089	1.85235	0	0
PELI2	ENSG00000139946	3.58695	1.84276	1.08953e-08	2.28027e-07
TFCP2L1	ENSG00000115112	3.58369	1.84145	0	0
HSPB8	ENSG00000152137	3.57058	1.83616	3.96662e-05	0.000289982
ZNF43	ENSG00000198521	3.56802	1.83512	9.33246e-05	0.000614971
CYP39A1	ENSG00000146233	3.5669	1.83467	1.84558e-06	2.0175e-05
MGAT4A	ENSG00000071073	3.55881	1.83139	0.00644599	0.0245114
TENT5A	ENSG00000112773	3.55591	1.83022	4.96074e-06	4.72677e-05
UGT1A6	ENSG00000167165	3.54879	1.82733	0	0
MATN2	ENSG00000132561	3.54263	1.82482	3.33157e-06	3.35732e-05
PDE5A	ENSG00000138735	3.53501	1.82172	1.11022e-16	1.79597e-14
AC092718.8	ENSG00000284512	3.53467	1.82158	0.00198071	0.00881569
CHADL	ENSG00000100399	3.5232	1.81688	7.53308e-07	9.21923e-06
ZNF606	ENSG00000166704	3.50857	1.81088	2.26361e-10	7.62152e-09
TSTD3	ENSG00000279170	3.50512	1.80947	0.000359911	0.00199832
CTSK	ENSG00000143387	3.49948	1.80714	7.40396e-05	0.000501563
KIT	ENSG00000157404	3.4936	1.80471	0.00780746	0.0289267
SELENBP1	ENSG00000143416	3.48751	1.8022	0.0113685	0.0401765
C2orf88	ENSG00000187699	3.48182	1.79984	0.00267684	0.011452
TNFSF10	ENSG00000121858	3.46132	1.79132	0.00282741	0.0120449
GSDMB	ENSG00000073605	3.46035	1.79092	0.00550957	0.0214123
PUS10	ENSG00000162927	3.45584	1.78904	1.11022e-16	1.79597e-14
CPE	ENSG00000109472	3.4545	1.78848	5.48372e-07	7.03951e-06
FILIP1L	ENSG00000168386	3.44304	1.78368	0.00035518	0.00197511
LPAR6	ENSG00000139679	3.4309	1.77859	6.35451e-11	2.48126e-09
XKRX	ENSG00000182489	3.42922	1.77788	0.0142235	0.0485871
ALDH1L1	ENSG00000144908	3.40347	1.76701	3.95764e-09	9.42952e-08
PDK4	ENSG00000004799	3.40239	1.76655	4.93132e-11	1.98313e-09
SCHIP1	ENSG00000151967	3.38764	1.76028	0.00926123	0.0335602
ZNF273	ENSG00000198039	3.3857	1.75945	4.53053e-08	7.88225e-07
LMBRD2	ENSG00000164187	3.38076	1.75735	0	0
SLC27A2	ENSG00000140284	3.38033	1.75716	2.00856e-07	2.92765e-06
TEX9	ENSG00000151575	3.3791	1.75664	4.53366e-10	1.40146e-08
USP2	ENSG00000036672	3.37459	1.75471	3.2708e-08	5.96367e-07
GAS1	ENSG00000180447	3.37381	1.75438	4.14261e-08	7.2888e-07
RSAD2	ENSG00000134321	3.36616	1.7511	0.00885814	0.0323132
MARCH1	ENSG00000145416	3.36383	1.75011	0.000158411	0.000977125
TSC22D3	ENSG00000157514	3.3636	1.75	0	0
TPPP	ENSG00000171368	3.35262	1.74529	2.10942e-15	2.54968e-13
TRMT9B	ENSG00000250305	3.34787	1.74324	7.64844e-06	6.92285e-05
KIAA0825	ENSG00000185261	3.34507	1.74203	1.20849e-07	1.88003e-06
LEPR	ENSG00000116678	3.32204	1.73207	3.9968e-15	4.5498e-13
CCDC146	ENSG00000135205	3.31908	1.73078	0.00193445	0.00864019
GPNMB	ENSG00000136235	3.30787	1.7259	2.46463e-05	0.000192125
LNX1	ENSG00000072201	3.30117	1.72298	0.000842472	0.00422611
ABCA5	ENSG00000154265	3.30037	1.72263	1.9142e-10	6.56841e-09
FAM49A	ENSG00000197872	3.30036	1.72262	0.000342125	0.00191141
NEBL	ENSG00000078114	3.2773	1.71251	0	0
TFPI	ENSG00000003436	3.26959	1.70911	2.07964e-07	3.01913e-06
MT-ND5	ENSG00000198786	3.268	1.70841	6.59497e-06	6.06856e-05
PBX1	ENSG00000185630	3.26305	1.70622	6.66134e-15	7.09498e-13
ZBTB41	ENSG00000177888	3.26255	1.706	5.20273e-12	2.69079e-10
TCP11L2	ENSG00000166046	3.24983	1.70036	5.4734e-14	4.67302e-12
GRIN3A	ENSG00000198785	3.23369	1.69318	0.00129458	0.00616078
IFIT1	ENSG00000185745	3.23045	1.69174	4.17834e-07	5.57673e-06
GNG2	ENSG00000186469	3.17939	1.66875	1.90468e-08	3.70852e-07
ZNF345	ENSG00000251247	3.17888	1.66852	0.0013172	0.0062491
CREBRF	ENSG00000164463	3.17606	1.66724	1.07025e-13	8.37329e-12
LMX1B	ENSG00000136944	3.17282	1.66577	0.00597132	0.022958
ZNF658	ENSG00000274349	3.16953	1.66427	6.90537e-12	3.42727e-10
PPM1E	ENSG00000175175	3.14929	1.65503	2.02537e-08	3.91166e-07
WNT5B	ENSG00000111186	3.13264	1.64738	5.21287e-05	0.000369782
PCSK1	ENSG00000175426	3.13056	1.64642	3.44788e-08	6.21283e-07
ZNF429	ENSG00000197013	3.10161	1.63302	0.00226759	0.00994236
TMEM178B	ENSG00000261115	3.10013	1.63233	1.67358e-10	5.81699e-09
RNASE4	ENSG00000258818	3.09405	1.6295	2.09598e-06	2.24689e-05
CFAP70	ENSG00000156042	3.0858	1.62564	0.000813688	0.00409988
CDKN1C	ENSG00000129757	3.08367	1.62465	5.81289e-06	5.42286e-05
ARRDC3	ENSG00000113369	3.07715	1.62159	0	0
PRR15L	ENSG00000167183	3.07598	1.62105	0.00444817	0.0178051
AC124312.1	ENSG00000214265	3.07456	1.62038	0.000986313	0.00485046
C21orf91	ENSG00000154642	3.06099	1.614	1.26565e-14	1.2266e-12
PGAP1	ENSG00000197121	3.05631	1.61179	0	0
TPPP3	ENSG00000159713	3.0554	1.61136	0.00287346	0.012213
WNT3A	ENSG00000154342	3.04442	1.60617	1.2332e-05	0.000105329
IGIP	ENSG00000182700	3.0418	1.60493	7.28022e-09	1.6065e-07
CLEC2D	ENSG00000069493	3.01265	1.59103	9.67191e-05	0.000633587
CEP126	ENSG00000110318	3.00856	1.58907	1.27486e-09	3.48965e-08
ZNF608	ENSG00000168916	3.0067	1.58818	0	0
C5AR1	ENSG00000197405	3.00653	1.5881	0.00933787	0.0338166
LIFR	ENSG00000113594	3.00317	1.58649	3.34664e-08	6.07107e-07
FRK	ENSG00000111816	3.00139	1.58563	4.21996e-13	2.89148e-11
CEP112	ENSG00000154240	2.99465	1.58239	0.00342302	0.0142229
OLFML2A	ENSG00000185585	2.99215	1.58118	6.32827e-15	6.84185e-13
WNT6	ENSG00000115596	2.99058	1.58042	0.0127903	0.0443524
STOX1	ENSG00000165730	2.98903	1.57968	0.00996145	0.0357797
GRAMD1C	ENSG00000178075	2.97915	1.5749	5.08699e-07	6.6091e-06
TSLP	ENSG00000145777	2.97288	1.57186	2.02429e-06	2.19298e-05
CAMK2B	ENSG00000058404	2.95783	1.56454	0	0
RORA	ENSG00000069667	2.95232	1.56185	1.55118e-06	1.72378e-05
ATP7A	ENSG00000165240	2.94802	1.55975	2.28029e-12	1.31177e-10
ZNF713	ENSG00000178665	2.94778	1.55963	0.000378487	0.00208745
CXADR	ENSG00000154639	2.94664	1.55907	1.11022e-16	1.79597e-14
MT-ATP6	ENSG00000198899	2.94073	1.55617	0.000542284	0.00285682
ZNF763	ENSG00000197054	2.93907	1.55536	0.000489586	0.00261506
BMT2	ENSG00000164603	2.91516	1.54358	2.92867e-08	5.41791e-07
CRYAB	ENSG00000109846	2.91344	1.54272	0.00134243	0.00634983
TMEM56	ENSG00000152078	2.90788	1.53997	4.23248e-08	7.4215e-07
SLC7A11	ENSG00000151012	2.90517	1.53862	0	0
EFHD1	ENSG00000115468	2.9012	1.53665	3.27849e-12	1.79483e-10
RRM2B	ENSG00000048392	2.89792	1.53502	0	0
C5	ENSG00000106804	2.89742	1.53477	1.70974e-14	1.62049e-12
EID3	ENSG00000255150	2.89734	1.53473	0.00502727	0.0197734
USH1G	ENSG00000182040	2.89679	1.53446	0.00302777	0.012773
GADD45G	ENSG00000130222	2.89563	1.53388	0.0127439	0.0442305
GLCCI1	ENSG00000106415	2.89343	1.53278	3.19312e-11	1.34442e-09
LOX	ENSG00000113083	2.88547	1.52881	0	0
GPR68	ENSG00000119714	2.8844	1.52827	1.31121e-06	1.4958e-05
MT-ND2	ENSG00000198763	2.88286	1.5275	0.000383423	0.00211197
ECM2	ENSG00000106823	2.87948	1.52581	0.00254106	0.0109649
LYNX1	ENSG00000180155	2.87601	1.52407	9.60763e-05	0.0006304
ADAM22	ENSG00000008277	2.87121	1.52166	0.0123456	0.0430424
MT-ND1	ENSG00000198888	2.85594	1.51397	0.000360323	0.00200009
ZNF654	ENSG00000175105	2.85031	1.51112	6.66134e-15	7.09498e-13
GBP6	ENSG00000183347	2.84533	1.50859	0.000443046	0.00239681
LCA5	ENSG00000135338	2.8443	1.50807	6.41895e-07	7.99674e-06
MPP7	ENSG00000150054	2.8439	1.50787	0	0
GBP1	ENSG00000117228	2.84277	1.5073	0.0126802	0.0440663
PPFIBP2	ENSG00000166387	2.8408	1.5063	0.000848359	0.00425167
RASSF9	ENSG00000198774	2.84016	1.50597	2.3799e-08	4.52329e-07
TMEM170B	ENSG00000205269	2.83566	1.50368	0.0120894	0.0423001
TMCC2	ENSG00000133069	2.83522	1.50346	6.61989e-09	1.48671e-07
ELMOD2	ENSG00000179387	2.82902	1.5003	2.22045e-15	2.66888e-13
TCEANC	ENSG00000176896	2.82783	1.4997	0.00570026	0.0220538
PLCB1	ENSG00000182621	2.81973	1.49556	1.93064e-10	6.6143e-09
DDX60	ENSG00000137628	2.81731	1.49432	2.25298e-12	1.30303e-10
MT-ND4	ENSG00000198886	2.80418	1.48758	0.000546409	0.00287714
NKPD1	ENSG00000179846	2.80394	1.48746	0.000757046	0.00384783
BGN	ENSG00000182492	2.80292	1.48693	8.18046e-12	4.01832e-10
CCDC7	ENSG00000216937	2.79924	1.48503	1.75254e-05	0.000142825
SEMA3C	ENSG00000075223	2.79468	1.48268	0	0
MACROD2	ENSG00000172264	2.79343	1.48204	0.000875499	0.00436836
SLC9A9	ENSG00000181804	2.79188	1.48124	1.18784e-05	0.000101777
RBM43	ENSG00000184898	2.79078	1.48067	1.81476e-06	1.99004e-05
PKDREJ	ENSG00000130943	2.7849	1.47763	0.00283411	0.0120697
ZNF736	ENSG00000234444	2.78006	1.47511	2.01954e-09	5.2731e-08
PPM1L	ENSG00000163590	2.77617	1.47309	0.000135859	0.00085418
LCA5L	ENSG00000157578	2.76929	1.46952	0.00122949	0.00587701
FZD10	ENSG00000111432	2.7619	1.46566	9.73521e-10	2.75596e-08
FAM13A	ENSG00000138640	2.75782	1.46353	1.62337e-10	5.66995e-09
ILDR1	ENSG00000145103	2.74861	1.4587	6.81217e-05	0.000468255
MTUS1	ENSG00000129422	2.74584	1.45725	0	0
PCMTD1	ENSG00000168300	2.74467	1.45663	2.79876e-12	1.56811e-10
DNAJC28	ENSG00000177692	2.73715	1.45267	0.00308421	0.0129704
RNF128	ENSG00000133135	2.732	1.44996	3.9581e-05	0.000289556
PIK3R3	ENSG00000117461	2.72918	1.44847	8.88178e-16	1.19432e-13
SMIM14	ENSG00000163683	2.72345	1.44544	1.9762e-14	1.8486e-12
DENND4C	ENSG00000137145	2.72221	1.44478	0	0
FAXDC2	ENSG00000170271	2.72152	1.44441	8.87914e-05	0.000587799
HERC5	ENSG00000138646	2.71783	1.44246	8.41362e-09	1.82663e-07
RGPD8	ENSG00000169629	2.71625	1.44162	0.000136868	0.000858267
MANEA	ENSG00000172469	2.71604	1.44151	6.89096e-10	2.03933e-08
VAMP1	ENSG00000139190	2.71376	1.44029	0.000769398	0.00390415
KLHL4	ENSG00000102271	2.70616	1.43625	1.78323e-08	3.49737e-07
AC098850.3	ENSG00000266302	2.70584	1.43608	0.00302083	0.0127487
THAP9	ENSG00000168152	2.7038	1.43499	1.94623e-06	2.11531e-05
LYST	ENSG00000143669	2.70371	1.43494	9.99201e-16	1.31084e-13
NYNRIN	ENSG00000205978	2.70316	1.43464	0.00207319	0.00918739
SYTL2	ENSG00000137501	2.69443	1.42998	4.40413e-05	0.000318397
ERO1B	ENSG00000086619	2.69032	1.42778	0.00444199	0.0177837
NCOA7	ENSG00000111912	2.68654	1.42575	5.55112e-16	8.06975e-14
GCNT4	ENSG00000176928	2.68606	1.42549	4.15633e-05	0.000302413
RGMA	ENSG00000182175	2.68438	1.42459	1.38261e-06	1.56398e-05
TMTC3	ENSG00000139324	2.68073	1.42263	1.75193e-13	1.3319e-11
KLHDC1	ENSG00000197776	2.68032	1.4224	0.00471886	0.0187774
DUSP19	ENSG00000162999	2.67805	1.42118	6.66007e-06	6.11311e-05
TXNDC16	ENSG00000087301	2.67709	1.42066	4.64695e-09	1.09029e-07
TMEM106B	ENSG00000106460	2.6744	1.41921	2.4406e-12	1.38914e-10
AKR1C3	ENSG00000196139	2.66849	1.41602	1.36172e-05	0.000114532
CSPG4	ENSG00000173546	2.66604	1.4147	1.35066e-06	1.53267e-05
CPAMD8	ENSG00000160111	2.65966	1.41124	0.00792252	0.0293278
RASD2	ENSG00000100302	2.65922	1.411	2.82151e-06	2.90832e-05
TRIM2	ENSG00000109654	2.65474	1.40857	2.24665e-12	1.30303e-10
PALMD	ENSG00000099260	2.65469	1.40855	1.33241e-06	1.51596e-05
CACNB2	ENSG00000165995	2.65311	1.40769	0.000806367	0.00407075
ARL5B	ENSG00000165997	2.65091	1.40649	9.03166e-13	5.8529e-11
FSBP	ENSG00000265817	2.64539	1.40348	0.000149434	0.000929684
WNT5A	ENSG00000114251	2.64303	1.40219	1.77636e-15	2.20915e-13
KRCC1	ENSG00000172086	2.64189	1.40157	2.2931e-09	5.85245e-08
RHBDL1	ENSG00000103269	2.63258	1.39647	0.00122216	0.0058498
PLIN4	ENSG00000167676	2.63231	1.39633	3.52855e-10	1.11811e-08
ACBD7	ENSG00000176244	2.63163	1.39596	3.22153e-07	4.41755e-06
ZSCAN31	ENSG00000235109	2.6274	1.39363	3.64578e-05	0.000269921
CYP4X1	ENSG00000186377	2.62482	1.39222	0.000145029	0.000903648
SSBP2	ENSG00000145687	2.62471	1.39216	5.52203e-11	2.17993e-09
ZNF138	ENSG00000197008	2.62201	1.39068	0.000131196	0.000829958
PRODH	ENSG00000100033	2.62011	1.38963	0.00366092	0.0150746
ZNF519	ENSG00000175322	2.61923	1.38914	5.97534e-05	0.000416975
DNAJB14	ENSG00000164031	2.61898	1.38901	9.37719e-11	3.50261e-09
PRTG	ENSG00000166450	2.61648	1.38763	0.00572888	0.0221446
ITGB8	ENSG00000105855	2.61328	1.38586	0	0
VPS13C	ENSG00000129003	2.60638	1.38205	3.44169e-15	3.98107e-13
ZSCAN23	ENSG00000187987	2.60036	1.37871	0.0014015	0.00657221
CDKN2C	ENSG00000123080	2.59925	1.3781	3.05633e-12	1.68608e-10
ANKRD36C	ENSG00000174501	2.59899	1.37795	1.70195e-09	4.54312e-08
DNAJC27	ENSG00000115137	2.59385	1.3751	3.35396e-06	3.37513e-05
ZFP14	ENSG00000142065	2.593	1.37462	8.65841e-05	0.000575844
NR1D2	ENSG00000174738	2.59134	1.3737	1.55431e-15	1.97876e-13
PRKG2	ENSG00000138669	2.58698	1.37127	0.000126972	0.000807189
MEIOC	ENSG00000180336	2.58677	1.37115	1.46373e-06	1.64279e-05
ATP10A	ENSG00000206190	2.57877	1.36668	0.000346366	0.00193259
CCDC126	ENSG00000169193	2.57594	1.3651	1.13992e-05	9.81804e-05
ZNF708	ENSG00000182141	2.57423	1.36414	0.0049081	0.0193971
YPEL2	ENSG00000175155	2.56868	1.36103	1.46194e-06	1.64223e-05
FMO5	ENSG00000131781	2.55659	1.35422	0.009138	0.0331653
TGFB2	ENSG00000092969	2.55528	1.35348	0.000150333	0.000933574
HOXD9	ENSG00000128709	2.55348	1.35247	7.61847e-05	0.000514636
FAM214A	ENSG00000047346	2.55229	1.35179	1.59284e-12	9.73576e-11
DEPTOR	ENSG00000155792	2.55217	1.35173	0.000399236	0.00218786
PROS1	ENSG00000184500	2.54948	1.3502	4.26775e-08	7.47725e-07
ZC3H6	ENSG00000188177	2.54581	1.34813	1.83554e-11	8.1933e-10
ZNF415	ENSG00000170954	2.54095	1.34537	0.00139387	0.00654588
SPTSSB	ENSG00000196542	2.53806	1.34373	0.0132444	0.0457315
FAM76B	ENSG00000077458	2.53558	1.34232	8.00073e-07	9.69779e-06
ZGRF1	ENSG00000138658	2.53357	1.34117	1.01626e-10	3.75041e-09
IFIT3	ENSG00000119917	2.53324	1.34098	3.89393e-06	3.82373e-05
SPEF2	ENSG00000152582	2.53083	1.33961	0.00251623	0.0108774
ZNF467	ENSG00000181444	2.53078	1.33958	5.59373e-06	5.24854e-05
IFIT2	ENSG00000119922	2.53073	1.33956	8.2856e-10	2.38187e-08
CD58	ENSG00000116815	2.53073	1.33955	2.22873e-09	5.72209e-08
PRIMA1	ENSG00000175785	2.5293	1.33874	0.0141855	0.0485062
ENPP5	ENSG00000112796	2.529	1.33857	0.000428025	0.00232256
ZNF141	ENSG00000131127	2.5281	1.33805	1.93903e-06	2.10911e-05
KLHL13	ENSG00000003096	2.52605	1.33688	3.18401e-10	1.02753e-08
PIK3IP1	ENSG00000100100	2.52319	1.33525	1.07917e-07	1.68983e-06
MT-ND3	ENSG00000198840	2.52218	1.33467	0.00146286	0.00682575
NINJ1	ENSG00000131669	2.5206	1.33377	8.6664e-13	5.63316e-11
SCAI	ENSG00000173611	2.52023	1.33355	7.77156e-16	1.09284e-13
P2RX7	ENSG00000089041	2.51696	1.33168	0.000320622	0.00180865
TBC1D8B	ENSG00000133138	2.51626	1.33128	3.66595e-09	8.78318e-08
SDK2	ENSG00000069188	2.51585	1.33105	4.42997e-06	4.27978e-05
CASD1	ENSG00000127995	2.5151	1.33062	3.66668e-08	6.54678e-07
SERPINF2	ENSG00000167711	2.51444	1.33024	5.18778e-07	6.7157e-06
VANGL2	ENSG00000162738	2.51341	1.32965	0.00303456	0.0127917
GAS2L3	ENSG00000139354	2.51237	1.32905	1.73861e-13	1.32646e-11
CD302	ENSG00000241399	2.51144	1.32851	0.000154756	0.000957877
NPNT	ENSG00000168743	2.50818	1.32664	0.00544913	0.0212388
KAT2B	ENSG00000114166	2.50717	1.32606	4.73274e-05	0.00033953
THAP2	ENSG00000173451	2.50694	1.32593	6.84556e-05	0.00046965
ZNF148	ENSG00000163848	2.50633	1.32558	3.29714e-12	1.80046e-10
KLHL24	ENSG00000114796	2.50411	1.3243	1.17768e-11	5.52022e-10
RTKN2	ENSG00000182010	2.50377	1.3241	0.00299387	0.0126474
SC5D	ENSG00000109929	2.50273	1.3235	4.01679e-13	2.77882e-11
CHIC1	ENSG00000204116	2.50205	1.32311	1.26259e-06	1.45276e-05
KIAA1109	ENSG00000138688	2.50077	1.32237	8.21565e-15	8.41713e-13
ZDBF2	ENSG00000204186	2.5	1.32193	7.49998e-11	2.86103e-09
AP002495.2	ENSG00000254469	2.49652	1.31992	0.00119426	0.00573411
ZMAT3	ENSG00000172667	2.49475	1.3189	2.9976e-15	3.50508e-13
MLLT3	ENSG00000171843	2.49263	1.31767	6.10662e-11	2.39315e-09
ZNF780A	ENSG00000197782	2.49061	1.3165	1.2794e-06	1.46728e-05
OXR1	ENSG00000164830	2.48593	1.31379	5.44009e-15	5.97161e-13
MYB	ENSG00000118513	2.48571	1.31366	9.60466e-07	1.13541e-05
TBC1D32	ENSG00000146350	2.48459	1.31301	6.69322e-09	1.50005e-07
CCP110	ENSG00000103540	2.48439	1.31289	4.95159e-14	4.29571e-12
ZNF225	ENSG00000256294	2.48264	1.31188	0.000298546	0.00170196
BHLHE41	ENSG00000123095	2.48171	1.31133	2.55732e-06	2.66315e-05
TRIQK	ENSG00000205133	2.47435	1.30705	3.0619e-08	5.63049e-07
LYSMD3	ENSG00000176018	2.47414	1.30693	3.28626e-13	2.31006e-11
CDKL3	ENSG00000006837	2.47325	1.30641	0.00596049	0.0229246
AGL	ENSG00000162688	2.47248	1.30596	6.60583e-14	5.5735e-12
CD109	ENSG00000156535	2.47019	1.30462	5.55112e-16	8.06975e-14
SWT1	ENSG00000116668	2.46922	1.30406	0.000120357	0.000769764
ADD3	ENSG00000148700	2.46754	1.30307	1.34956e-11	6.24428e-10
PTEN	ENSG00000171862	2.46538	1.30181	0	0
COBLL1	ENSG00000082438	2.46447	1.30128	1.05186e-11	4.99575e-10
ALDH3B2	ENSG00000132746	2.46446	1.30127	0.000861902	0.00431151
CYP1A1	ENSG00000140465	2.46228	1.3	1.88199e-07	2.77458e-06
ZNF484	ENSG00000127081	2.45822	1.29761	3.06666e-12	1.68745e-10
MEGF9	ENSG00000106780	2.456	1.29631	0	0
FAM95C	ENSG00000283486	2.45286	1.29446	0.00246253	0.0106688
TRIM6	ENSG00000121236	2.45021	1.29291	9.11134e-08	1.46182e-06
GTF2IRD2	ENSG00000196275	2.44963	1.29256	0.0024199	0.0105244
AKAP5	ENSG00000179841	2.4468	1.2909	0.00620587	0.0237326
SUCO	ENSG00000094975	2.4458	1.29031	8.93874e-12	4.34124e-10
SALL2	ENSG00000165821	2.44385	1.28915	8.65862e-07	1.04306e-05
CADM1	ENSG00000182985	2.44252	1.28837	0.000377685	0.00208356
LRRCC1	ENSG00000133739	2.44236	1.28827	0.00166373	0.00760121
ALG10B	ENSG00000175548	2.44135	1.28768	2.15774e-08	4.14128e-07
RPS6KA5	ENSG00000100784	2.43595	1.28449	7.67786e-09	1.68814e-07
CCDC82	ENSG00000149231	2.43469	1.28374	4.32895e-07	5.74398e-06
CDK19	ENSG00000155111	2.43446	1.2836	1.05655e-11	5.007e-10
FSD2	ENSG00000186628	2.43434	1.28353	0.000884351	0.00440435
CEP70	ENSG00000114107	2.43405	1.28336	2.37232e-09	6.04029e-08
DMRTA1	ENSG00000176399	2.43117	1.28165	3.76509e-05	0.000277228
TMEM67	ENSG00000164953	2.4307	1.28137	8.01361e-09	1.74861e-07
C1R	ENSG00000159403	2.4296	1.28072	0.0117472	0.0412704
SLC44A5	ENSG00000137968	2.42563	1.27836	7.52703e-05	0.000509098
PPP1R3C	ENSG00000119938	2.41805	1.27385	5.28801e-11	2.10688e-09
STOX2	ENSG00000173320	2.41758	1.27356	5.08501e-08	8.68976e-07
DMXL1	ENSG00000172869	2.41698	1.2732	4.32987e-15	4.90301e-13
IL6R	ENSG00000160712	2.40517	1.26614	7.27196e-14	6.04078e-12
ACADSB	ENSG00000196177	2.40508	1.26608	0.000127298	0.000807909
FAM161A	ENSG00000170264	2.40405	1.26547	2.39865e-08	4.54569e-07
CNTF	ENSG00000242689	2.40337	1.26506	0.00441146	0.0176853
NPTXR	ENSG00000221890	2.40038	1.26327	0.000577252	0.00302033
EXPH5	ENSG00000110723	2.39843	1.26209	3.66374e-15	4.21526e-13
APOL6	ENSG00000221963	2.39667	1.26103	2.66454e-15	3.14986e-13
ARHGAP5	ENSG00000100852	2.39508	1.26007	1.76403e-12	1.07516e-10
ANOS1	ENSG00000011201	2.39435	1.25964	0.00754861	0.0281226
ZNF248	ENSG00000198105	2.39336	1.25904	9.16693e-08	1.46855e-06
CRYBG3	ENSG00000080200	2.39332	1.25901	2.22529e-10	7.52783e-09
SEPT4	ENSG00000108387	2.39128	1.25778	0.000424479	0.00230476
ITGB3BP	ENSG00000142856	2.38474	1.25383	5.57655e-11	2.19341e-09
ATM	ENSG00000149311	2.38105	1.2516	8.77076e-15	8.85929e-13
NBEA	ENSG00000172915	2.38052	1.25127	0.00319217	0.0133748
FAM227B	ENSG00000166262	2.37891	1.2503	0.00092109	0.00456566
ZNF292	ENSG00000188994	2.37817	1.24985	1.27433e-10	4.59249e-09
HMMR	ENSG00000072571	2.37387	1.24724	9.94049e-11	3.68741e-09
TTC33	ENSG00000113638	2.37382	1.24721	1.83197e-10	6.30637e-09
ZNF107	ENSG00000196247	2.37277	1.24657	3.53671e-05	0.000262841
LXN	ENSG00000079257	2.37201	1.24611	0.00259254	0.0111535
GP1BA	ENSG00000185245	2.36897	1.24426	0.000414013	0.00225735
ANKRD44	ENSG00000065413	2.36883	1.24417	0.006172	0.0236252
POLI	ENSG00000101751	2.36733	1.24326	2.37588e-08	4.51963e-07
RBP1	ENSG00000114115	2.36366	1.24102	0.00662866	0.0251061
CAMK4	ENSG00000152495	2.36316	1.24072	0.00152025	0.00705832
KLF15	ENSG00000163884	2.36312	1.24069	0.00323721	0.0135529
SENP7	ENSG00000138468	2.3626	1.24038	9.14033e-07	1.09025e-05
PDE8B	ENSG00000113231	2.3613	1.23958	1.04989e-05	9.1488e-05
ZNF420	ENSG00000197050	2.35928	1.23835	0.000123522	0.000788133
PDGFC	ENSG00000145431	2.3583	1.23775	2.04333e-10	6.96707e-09
SERPINI1	ENSG00000163536	2.3578	1.23744	0.00825524	0.0303973
ZNF354C	ENSG00000177932	2.35498	1.23572	1.02104e-09	2.8641e-08
INKA2	ENSG00000197852	2.35465	1.23552	1.57269e-10	5.50187e-09
ZNF518A	ENSG00000177853	2.34918	1.23216	1.8994e-09	4.9836e-08
ZNF181	ENSG00000197841	2.3477	1.23125	3.79447e-06	3.74315e-05
FNIP1	ENSG00000217128	2.34729	1.23099	8.54872e-14	6.99337e-12
DLX3	ENSG00000064195	2.34606	1.23024	2.38881e-06	2.50954e-05
GULP1	ENSG00000144366	2.3452	1.22971	0.00038771	0.00213231
TSHZ2	ENSG00000182463	2.33732	1.22485	1.76239e-09	4.66967e-08
KDELC2	ENSG00000178202	2.33708	1.2247	8.88178e-16	1.19432e-13
KPNA5	ENSG00000196911	2.33472	1.22325	1.24273e-06	1.43595e-05
PDIK1L	ENSG00000175087	2.33284	1.22209	5.92111e-08	9.94479e-07
MPHOSPH9	ENSG00000051825	2.33282	1.22207	2.18825e-13	1.6251e-11
GPR155	ENSG00000163328	2.32923	1.21985	0.000186869	0.0011265
DPY19L4	ENSG00000156162	2.32541	1.21748	2.77611e-12	1.55948e-10
KLHL15	ENSG00000174010	2.32495	1.2172	7.0208e-08	1.15838e-06
CERS6	ENSG00000172292	2.3242	1.21673	2.56239e-13	1.86815e-11
BLOC1S5-TXNDC5	ENSG00000259040	2.32134	1.21496	0.000288431	0.0016513
CACNB4	ENSG00000182389	2.31933	1.21371	3.52418e-11	1.46659e-09
APLF	ENSG00000169621	2.31726	1.21242	2.11857e-05	0.000168134
HS2ST1	ENSG00000153936	2.31696	1.21223	9.9476e-14	7.98592e-12
SNX13	ENSG00000071189	2.31627	1.2118	2.91989e-13	2.08018e-11
NUDT13	ENSG00000166321	2.30975	1.20773	0.000220922	0.00130401
ADRA2B	ENSG00000274286	2.30878	1.20713	0.00980595	0.0352919
CST6	ENSG00000175315	2.30837	1.20687	0.000852561	0.00427174
TIA1	ENSG00000116001	2.30826	1.20681	6.35625e-12	3.1952e-10
ANK3	ENSG00000151150	2.30569	1.2052	6.32827e-15	6.84185e-13
ZNF461	ENSG00000197808	2.30406	1.20418	0.000141407	0.000884928
KRT19	ENSG00000171345	2.30327	1.20368	5.55112e-16	8.06975e-14
ENPP4	ENSG00000001561	2.30209	1.20294	0.00350623	0.0145266
REL	ENSG00000162924	2.30155	1.20261	1.51423e-10	5.34953e-09
GASK1B	ENSG00000164125	2.30134	1.20247	8.80165e-05	0.000583747
PIK3C2B	ENSG00000133056	2.3005	1.20195	1.09092e-11	5.15638e-10
PJA2	ENSG00000198961	2.29922	1.20114	3.31957e-14	2.93911e-12
HSPA13	ENSG00000155304	2.29665	1.19953	2.27274e-12	1.31094e-10
SLC26A2	ENSG00000155850	2.29447	1.19816	2.93832e-12	1.63777e-10
GPR135	ENSG00000181619	2.29416	1.19797	0.00131926	0.00625746
SH3GL3	ENSG00000140600	2.29372	1.19769	1.79389e-07	2.66359e-06
GK	ENSG00000198814	2.29358	1.1976	0.000335587	0.00187927
APPBP2	ENSG00000062725	2.29139	1.19622	9.99201e-16	1.31084e-13
GLCE	ENSG00000138604	2.28944	1.195	1.64537e-11	7.4684e-10
SNX16	ENSG00000104497	2.28714	1.19354	0.000127178	0.000807623
ZC2HC1A	ENSG00000104427	2.2862	1.19295	3.40133e-05	0.000254238
PIK3R1	ENSG00000145675	2.28529	1.19238	3.25073e-13	2.30064e-11
IL6ST	ENSG00000134352	2.28511	1.19226	1.37209e-10	4.90373e-09
ARAP2	ENSG00000047365	2.28453	1.1919	2.47913e-13	1.81423e-11
TMEM123	ENSG00000152558	2.28443	1.19184	1.9184e-11	8.44056e-10
SKIDA1	ENSG00000180592	2.28269	1.19074	0.010908	0.0387269
ZNF260	ENSG00000254004	2.28075	1.18951	4.92517e-06	4.69911e-05
TUT4	ENSG00000134744	2.27842	1.18803	4.30089e-12	2.26244e-10
CTDSPL2	ENSG00000137770	2.27666	1.18692	2.19047e-13	1.6251e-11
ZNF879	ENSG00000234284	2.27665	1.18691	9.79343e-06	8.58971e-05
DCP2	ENSG00000172795	2.27608	1.18655	5.90306e-12	2.98834e-10
BMP7	ENSG00000101144	2.2757	1.18631	6.31919e-06	5.83758e-05
TTC14	ENSG00000163728	2.27283	1.18449	4.65012e-11	1.88059e-09
FP565260.6	ENSG00000280433	2.27142	1.18359	3.03608e-06	3.09579e-05
MLXIPL	ENSG00000009950	2.27088	1.18325	0.00582157	0.0224545
EXOC6	ENSG00000138190	2.27067	1.18312	5.79701e-07	7.34094e-06
MAN1A1	ENSG00000111885	2.26936	1.18229	0.000212027	0.00125841
ABRAXAS1	ENSG00000163322	2.2684	1.18168	3.45716e-09	8.31999e-08
ANKMY2	ENSG00000106524	2.26806	1.18146	3.15342e-11	1.33031e-09
RHOU	ENSG00000116574	2.2663	1.18034	0.00881553	0.032185
CEL	ENSG00000170835	2.26602	1.18016	0.000334317	0.00187265
CLU	ENSG00000120885	2.26559	1.17989	5.13665e-09	1.19476e-07
TET2	ENSG00000168769	2.26557	1.17988	7.11483e-09	1.57485e-07
NCOA2	ENSG00000140396	2.2651	1.17957	1.02141e-13	8.13909e-12
CLK4	ENSG00000113240	2.26423	1.17902	2.37566e-06	2.49816e-05
ERV3-1	ENSG00000213462	2.26407	1.17892	0.000325656	0.00183368
DCUN1D4	ENSG00000109184	2.26306	1.17828	1.33482e-12	8.22885e-11
CCPG1	ENSG00000260916	2.26293	1.17819	4.72671e-09	1.10662e-07
AKAP9	ENSG00000127914	2.26146	1.17725	6.974e-07	8.62331e-06
ICK	ENSG00000112144	2.26084	1.17686	1.56867e-11	7.1504e-10
PLB1	ENSG00000163803	2.2552	1.17326	0.000680684	0.00350189
DNAJB4	ENSG00000162616	2.25301	1.17186	6.46965e-09	1.45753e-07
CPD	ENSG00000108582	2.25238	1.17145	4.44089e-16	6.63512e-14
SESN1	ENSG00000080546	2.25035	1.17015	2.02873e-11	8.85359e-10
TMEM117	ENSG00000139173	2.24836	1.16887	0.00215702	0.00950797
SCN4B	ENSG00000177098	2.24677	1.16785	1.07077e-05	9.31187e-05
VPS13A	ENSG00000197969	2.24671	1.16782	8.36097e-10	2.39529e-08
CEP350	ENSG00000135837	2.24658	1.16773	3.89466e-12	2.07093e-10
DEPDC1	ENSG00000024526	2.2454	1.16698	2.61056e-09	6.54618e-08
KCNAB1	ENSG00000169282	2.24425	1.16624	0.000876728	0.00437246
SYCP2	ENSG00000196074	2.24395	1.16604	0.000421925	0.00229235
ST6GALNAC2	ENSG00000070731	2.24338	1.16568	2.01664e-08	3.9018e-07
CCNE2	ENSG00000175305	2.24212	1.16487	7.384e-06	6.7089e-05
PDE4D	ENSG00000113448	2.24081	1.16402	1.63351e-06	1.80787e-05
DZIP3	ENSG00000198919	2.23924	1.16301	2.07331e-07	3.014e-06
LNPK	ENSG00000144320	2.23569	1.16072	1.93638e-11	8.50231e-10
TRIM22	ENSG00000132274	2.23562	1.16067	0.000360422	0.00200012
DNAH1	ENSG00000114841	2.23315	1.15908	0.0068531	0.0258811
ARHGEF37	ENSG00000183111	2.2324	1.1586	9.68888e-09	2.07833e-07
ZNF571	ENSG00000180479	2.23233	1.15855	0.000196413	0.00117645
DAAM1	ENSG00000100592	2.23024	1.1572	9.04832e-14	7.34621e-12
ZBTB10	ENSG00000205189	2.22843	1.15603	5.32052e-12	2.73201e-10
ABCC6	ENSG00000091262	2.22807	1.1558	0.0115261	0.0406265
GCLC	ENSG00000001084	2.22773	1.15558	1.55431e-15	1.97876e-13
IDH1	ENSG00000138413	2.22709	1.15516	1.11022e-15	1.43894e-13
CNOT6L	ENSG00000138767	2.22689	1.15503	1.85196e-12	1.11924e-10
ZNF678	ENSG00000181450	2.22685	1.15501	0.000812722	0.00409694
MBNL2	ENSG00000139793	2.22271	1.15232	1.0747e-13	8.37757e-12
LNPEP	ENSG00000113441	2.22249	1.15218	6.11178e-13	4.13506e-11
ZNF214	ENSG00000149050	2.22219	1.15198	0.000643566	0.00332605
TLR6	ENSG00000174130	2.22144	1.1515	7.06959e-07	8.71402e-06
C4orf33	ENSG00000151470	2.22046	1.15086	2.7797e-05	0.000213209
MT-CYB	ENSG00000198727	2.2176	1.149	5.16495e-07	6.69018e-06
RADX	ENSG00000147231	2.21757	1.14898	8.83467e-07	1.05893e-05
TOP2A	ENSG00000131747	2.21688	1.14853	1.00808e-13	8.06279e-12
PIGK	ENSG00000142892	2.2166	1.14835	1.98352e-12	1.17888e-10
ZNF184	ENSG00000096654	2.21634	1.14818	1.47605e-07	2.23437e-06
MT-CO2	ENSG00000198712	2.21448	1.14697	0.0100046	0.0359047
ZNF891	ENSG00000214029	2.2121	1.14542	6.61453e-06	6.0779e-05
LZTS1	ENSG00000061337	2.21163	1.14511	0.00388436	0.015864
TRPM7	ENSG00000092439	2.2115	1.14503	8.43769e-15	8.60365e-13
NIPAL2	ENSG00000104361	2.21128	1.14488	1.93783e-05	0.000156034
GABARAPL1	ENSG00000139112	2.21094	1.14466	1.72614e-08	3.40403e-07
MIER3	ENSG00000155545	2.21044	1.14434	2.82304e-10	9.24471e-09
CASTOR1	ENSG00000239282	2.20943	1.14367	0.000587142	0.00306239
CACNA1G	ENSG00000006283	2.20925	1.14356	0.0114248	0.0403686
SLC2A4	ENSG00000181856	2.20742	1.14236	0.00500618	0.0196959
KANSL1L	ENSG00000144445	2.20735	1.14231	4.0672e-06	3.96672e-05
ZFYVE16	ENSG00000039319	2.20339	1.13972	3.63117e-11	1.50529e-09
G2E3	ENSG00000092140	2.20297	1.13945	8.90218e-08	1.43469e-06
ZNF10	ENSG00000256223	2.20147	1.13847	0.00244742	0.0106119
FSD1L	ENSG00000106701	2.19924	1.13701	9.39065e-06	8.29052e-05
NXT2	ENSG00000101888	2.19888	1.13677	1.21942e-05	0.000104235
PCYOX1	ENSG00000116005	2.19885	1.13675	4.12337e-13	2.84341e-11
NREP	ENSG00000134986	2.19611	1.13495	3.84454e-10	1.20752e-08
BMPR2	ENSG00000204217	2.19274	1.13274	1.26332e-12	7.81046e-11
POT1	ENSG00000128513	2.1911	1.13166	1.00688e-10	3.72219e-09
ZNF644	ENSG00000122482	2.18566	1.12807	2.84668e-08	5.28897e-07
EPS8	ENSG00000151491	2.18382	1.12685	2.55743e-09	6.44298e-08
HOOK1	ENSG00000134709	2.18251	1.12599	6.63106e-10	1.97315e-08
ETFRF1	ENSG00000205707	2.1786	1.1234	0.000175406	0.00106848
TMEM30A	ENSG00000112697	2.17804	1.12303	2.01733e-11	8.82172e-10
ZNF12	ENSG00000164631	2.17762	1.12275	1.4705e-09	3.97959e-08
MAPK10	ENSG00000109339	2.17629	1.12187	0.000205909	0.00122786
PHTF2	ENSG00000006576	2.17358	1.12007	1.00616e-10	3.72219e-09
SHOC2	ENSG00000108061	2.17231	1.11923	1.50551e-09	4.05902e-08
NMRK1	ENSG00000106733	2.17104	1.11839	0.000139005	0.00087065
ANKRD26	ENSG00000107890	2.17073	1.11818	9.04265e-06	8.01948e-05
TNS1	ENSG00000079308	2.16969	1.11749	2.07569e-09	5.41315e-08
TTC39B	ENSG00000155158	2.16952	1.11737	0.000183521	0.00111005
BCLAF3	ENSG00000173681	2.16786	1.11627	0.000176481	0.0010735
EPHX1	ENSG00000143819	2.16612	1.11511	6.10471e-09	1.39282e-07
SORT1	ENSG00000134243	2.16599	1.11503	0	0
KLHDC8B	ENSG00000185909	2.16437	1.11395	1.29967e-06	1.48499e-05
ZNF436	ENSG00000125945	2.16436	1.11394	2.04503e-13	1.53306e-11
ZNF254	ENSG00000213096	2.16315	1.11313	0.000159055	0.000980818
HSPA4L	ENSG00000164070	2.16172	1.11218	7.69385e-13	5.10905e-11
TMX3	ENSG00000166479	2.1611	1.11176	3.42263e-11	1.43264e-09
STAG2	ENSG00000101972	2.15996	1.111	1.45479e-10	5.16499e-09
TMEM161B	ENSG00000164180	2.15868	1.11015	4.81915e-08	8.32804e-07
MCOLN3	ENSG00000055732	2.15726	1.1092	2.59923e-07	3.65268e-06
HINT3	ENSG00000111911	2.15705	1.10906	6.6612e-09	1.49443e-07
ZNF431	ENSG00000196705	2.15402	1.10703	2.62017e-08	4.91481e-07
AC116366.3	ENSG00000283782	2.15393	1.10697	0.00198236	0.00882121
PTPN4	ENSG00000088179	2.1513	1.10521	1.4953e-10	5.29134e-09
MTTP	ENSG00000138823	2.1508	1.10488	0.000171344	0.001047
RCOR3	ENSG00000117625	2.15019	1.10446	6.06926e-12	3.05808e-10
TMEM65	ENSG00000164983	2.14595	1.10161	4.54015e-12	2.35945e-10
SCPEP1	ENSG00000121064	2.14586	1.10156	3.49021e-12	1.89148e-10
GNA13	ENSG00000120063	2.14506	1.10102	1.14808e-12	7.13901e-11
ETAA1	ENSG00000143971	2.14306	1.09967	2.47802e-05	0.000193029
PARP14	ENSG00000173193	2.1419	1.09889	4.47032e-11	1.8147e-09
KRBA2	ENSG00000184619	2.14163	1.09871	0.00094228	0.00465728
TBXAS1	ENSG00000059377	2.14148	1.09861	0.00155625	0.00719751
MAP3K2	ENSG00000169967	2.13937	1.09719	1.3517e-10	4.8389e-09
INTU	ENSG00000164066	2.13921	1.09708	5.29921e-12	2.72757e-10
DCUN1D1	ENSG00000043093	2.13914	1.09703	6.2163e-07	7.78032e-06
RAD51AP1	ENSG00000111247	2.13907	1.09698	2.04359e-06	2.20611e-05
ARID5B	ENSG00000150347	2.13905	1.09697	4.44089e-16	6.63512e-14
TLK1	ENSG00000198586	2.13821	1.09641	3.04226e-10	9.85757e-09
PAIP2B	ENSG00000124374	2.13503	1.09425	1.66878e-08	3.29998e-07
PDK3	ENSG00000067992	2.13497	1.09422	2.44132e-10	8.14341e-09
MBNL3	ENSG00000076770	2.13482	1.09411	5.48653e-06	5.15471e-05
LRP1	ENSG00000123384	2.13432	1.09378	2.50722e-11	1.07886e-09
TMEM19	ENSG00000139291	2.13393	1.09351	5.55181e-11	2.18768e-09
RALGPS1	ENSG00000136828	2.13355	1.09325	1.50953e-06	1.68802e-05
SOS1	ENSG00000115904	2.13279	1.09274	3.04063e-11	1.28778e-09
PPIL6	ENSG00000185250	2.13257	1.0926	0.00234809	0.0102452
DNM3	ENSG00000197959	2.13142	1.09182	0.00419698	0.0169478
CEP44	ENSG00000164118	2.13102	1.09154	7.82099e-10	2.28006e-08
TBL1XR1	ENSG00000177565	2.12977	1.0907	3.54099e-11	1.47074e-09
BMI1	ENSG00000168283	2.12898	1.09017	2.44098e-09	6.17855e-08
CEP295	ENSG00000166004	2.12886	1.09008	5.19742e-09	1.20759e-07
CHRM3	ENSG00000133019	2.12881	1.09005	5.04172e-06	4.79331e-05
FOXN3	ENSG00000053254	2.12869	1.08996	1.33671e-13	1.02712e-11
STX17	ENSG00000136874	2.12855	1.08987	3.93285e-12	2.08412e-10
SGO2	ENSG00000163535	2.12719	1.08895	1.82625e-05	0.000148047
ITGAV	ENSG00000138448	2.12675	1.08865	1.84617e-11	8.22366e-10
ZNF441	ENSG00000197044	2.12618	1.08827	0.00380446	0.0155762
ATRX	ENSG00000085224	2.12567	1.08792	2.45651e-07	3.47253e-06
ATF2	ENSG00000115966	2.12532	1.08768	6.53322e-10	1.94685e-08
SPPL2A	ENSG00000138600	2.12498	1.08745	1.54821e-11	7.11745e-10
MIER1	ENSG00000198160	2.12495	1.08743	6.77302e-09	1.51478e-07
CD164L2	ENSG00000174950	2.12468	1.08724	0.00602832	0.0231523
CDK1	ENSG00000170312	2.12369	1.08657	3.34281e-10	1.06707e-08
DOCK11	ENSG00000147251	2.12307	1.08615	4.23662e-10	1.32103e-08
ITFG1	ENSG00000129636	2.12255	1.0858	2.1162e-12	1.2474e-10
BCL2L11	ENSG00000153094	2.1222	1.08556	1.28623e-08	2.6181e-07
ZYG11B	ENSG00000162378	2.12183	1.08531	3.40727e-12	1.85589e-10
RNF152	ENSG00000176641	2.11944	1.08368	8.74223e-12	4.26506e-10
LIN9	ENSG00000183814	2.11906	1.08342	8.75528e-07	1.05117e-05
ZNF440	ENSG00000171295	2.11766	1.08247	8.9191e-10	2.53828e-08
BFSP1	ENSG00000125864	2.11696	1.08199	0.00482616	0.0191224
ATP8B1	ENSG00000081923	2.11523	1.08081	4.06e-11	1.66066e-09
ZBTB33	ENSG00000177485	2.11314	1.07939	1.2168e-13	9.4171e-12
PLEKHA1	ENSG00000107679	2.11243	1.0789	6.42011e-11	2.49781e-09
ABCD3	ENSG00000117528	2.11086	1.07783	8.88356e-12	4.3242e-10
RAB27B	ENSG00000041353	2.10982	1.07712	3.56517e-08	6.38291e-07
ADSSL1	ENSG00000185100	2.10982	1.07712	2.55496e-05	0.000198305
SNRNP48	ENSG00000168566	2.10834	1.07611	6.79985e-10	2.01513e-08
ZNF774	ENSG00000196391	2.10792	1.07582	1.00449e-08	2.14189e-07
FRRS1	ENSG00000156869	2.10772	1.07569	6.66797e-10	1.97878e-08
TCF4	ENSG00000196628	2.10676	1.07502	1.26431e-07	1.95554e-06
RAB33B	ENSG00000172007	2.10639	1.07477	3.38917e-06	3.40327e-05
GMCL1	ENSG00000087338	2.10629	1.0747	6.20075e-09	1.41024e-07
PTAR1	ENSG00000188647	2.10551	1.07417	1.21932e-08	2.49607e-07
RMI1	ENSG00000178966	2.10455	1.07351	5.24254e-10	1.59764e-08
TRIM52	ENSG00000183718	2.10397	1.07312	3.26898e-05	0.000246174
NECTIN4	ENSG00000143217	2.10349	1.07278	0.00219107	0.00964616
FZD6	ENSG00000164930	2.10171	1.07156	1.53354e-10	5.40001e-09
FAM172A	ENSG00000113391	2.09966	1.07016	7.02355e-11	2.70809e-09
ZNF563	ENSG00000188868	2.09942	1.06999	0.00121292	0.00580945
ZNF100	ENSG00000197020	2.09894	1.06966	0.000262078	0.00151576
S1PR5	ENSG00000180739	2.09817	1.06913	7.37166e-08	1.21319e-06
FGFR3	ENSG00000068078	2.09811	1.06909	7.59042e-06	6.87323e-05
ZNF84	ENSG00000198040	2.0979	1.06894	5.46627e-07	7.0213e-06
ZNF883	ENSG00000285447	2.09706	1.06837	0.00687136	0.0259364
MRPL1	ENSG00000169288	2.09704	1.06835	1.40785e-10	5.02322e-09
RGS5	ENSG00000143248	2.09687	1.06824	0.00801097	0.0296165
VPS37D	ENSG00000176428	2.0957	1.06743	0.00755005	0.0281232
NDUFA5	ENSG00000128609	2.09566	1.06741	3.23519e-08	5.90876e-07
FANCM	ENSG00000187790	2.09455	1.06664	6.12755e-07	7.68265e-06
PLEKHF2	ENSG00000175895	2.09429	1.06646	4.52982e-10	1.40146e-08
BBIP1	ENSG00000214413	2.09294	1.06553	1.29183e-05	0.000109683
MTERF2	ENSG00000120832	2.09252	1.06524	0.000185286	0.00111821
RHOT1	ENSG00000126858	2.09198	1.06487	8.8449e-11	3.30953e-09
ZNF738	ENSG00000172687	2.09175	1.06471	2.07699e-05	0.000165628
STXBP4	ENSG00000166263	2.09119	1.06432	9.16368e-08	1.46855e-06
DBP	ENSG00000105516	2.09095	1.06416	3.49503e-06	3.49909e-05
APH1B	ENSG00000138613	2.08959	1.06322	1.92622e-06	2.0973e-05
HOXD10	ENSG00000128710	2.08942	1.0631	1.22486e-07	1.90136e-06
UBE2W	ENSG00000104343	2.08907	1.06286	1.29601e-08	2.63301e-07
SLC35A3	ENSG00000117620	2.08809	1.06218	9.83545e-08	1.5571e-06
ULK1	ENSG00000177169	2.08658	1.06114	7.9098e-09	1.72771e-07
KLF9	ENSG00000119138	2.08646	1.06106	8.88178e-16	1.19432e-13
DSC2	ENSG00000134755	2.08522	1.0602	5.25367e-08	8.92409e-07
ANKRD49	ENSG00000168876	2.08435	1.0596	3.42409e-06	3.43287e-05
PSAPL1	ENSG00000178597	2.08402	1.05937	0.0141973	0.0485387
AKAP7	ENSG00000118507	2.08325	1.05884	0.00125383	0.00598141
CPEB3	ENSG00000107864	2.08312	1.05875	0.000518388	0.00274707
DMXL2	ENSG00000104093	2.08247	1.0583	8.18167e-10	2.3628e-08
FAM169A	ENSG00000198780	2.08226	1.05815	6.03084e-08	1.01212e-06
PPP1CB	ENSG00000213639	2.08104	1.0573	1.78969e-11	8.02192e-10
TTC3	ENSG00000182670	2.07994	1.05654	2.30949e-12	1.32503e-10
ERI2	ENSG00000196678	2.07942	1.05618	8.81149e-08	1.4222e-06
BAZ2B	ENSG00000123636	2.07931	1.0561	6.92591e-08	1.14536e-06
SCOC	ENSG00000153130	2.07879	1.05574	1.30407e-08	2.6444e-07
PDCD4	ENSG00000150593	2.07832	1.05542	1.37541e-08	2.76819e-07
HLTF	ENSG00000071794	2.07767	1.05496	3.29327e-10	1.05549e-08
MIB1	ENSG00000101752	2.07708	1.05456	3.12111e-10	1.00979e-08
CEP162	ENSG00000135315	2.07634	1.05404	0.00117482	0.00565084
CKAP2	ENSG00000136108	2.07605	1.05384	1.55014e-10	5.44956e-09
SLF1	ENSG00000133302	2.07471	1.05291	7.58636e-08	1.24311e-06
LMAN1	ENSG00000074695	2.07387	1.05233	7.48112e-11	2.8589e-09
ZNF226	ENSG00000167380	2.07337	1.05198	4.28699e-06	4.15658e-05
ZDHHC20	ENSG00000180776	2.07234	1.05126	1.11184e-10	4.04758e-09
CCDC14	ENSG00000175455	2.07214	1.05112	2.94357e-08	5.43612e-07
SETDB2	ENSG00000136169	2.07173	1.05083	5.79599e-07	7.34094e-06
LCORL	ENSG00000178177	2.07047	1.04996	5.91575e-06	5.50984e-05
CHD9	ENSG00000177200	2.06988	1.04954	1.08669e-08	2.27655e-07
SLC25A40	ENSG00000075303	2.06956	1.04932	1.15445e-08	2.3814e-07
ERMAP	ENSG00000164010	2.06951	1.04929	1.87423e-08	3.65585e-07
DCLRE1A	ENSG00000198924	2.06816	1.04835	1.88918e-11	8.36935e-10
PLCE1	ENSG00000138193	2.06713	1.04763	9.65894e-15	9.66568e-13
ATP11B	ENSG00000058063	2.06645	1.04715	8.73832e-10	2.49675e-08
CGGBP1	ENSG00000163320	2.0647	1.04593	2.51166e-12	1.42581e-10
MYBL1	ENSG00000185697	2.06424	1.04561	2.68682e-07	3.75614e-06
ZFP82	ENSG00000181007	2.06341	1.04503	0.00252726	0.0109154
MEIS1	ENSG00000143995	2.06339	1.04502	4.89908e-07	6.38811e-06
STYX	ENSG00000198252	2.06317	1.04486	4.95008e-08	8.4929e-07
UGGT2	ENSG00000102595	2.062	1.04405	1.46125e-07	2.21556e-06
ALDH6A1	ENSG00000119711	2.06156	1.04374	2.56474e-10	8.48929e-09
SYNE1	ENSG00000131018	2.06055	1.04303	2.71378e-10	8.94136e-09
UHRF1BP1L	ENSG00000111647	2.06006	1.04269	1.09287e-11	5.15638e-10
ZNF680	ENSG00000173041	2.05996	1.04262	7.43675e-06	6.75398e-05
KIAA1328	ENSG00000150477	2.05977	1.04248	0.000108896	0.000702521
CCDC186	ENSG00000165813	2.0586	1.04167	3.82938e-05	0.000281191
MME	ENSG00000196549	2.05777	1.04108	0.00336565	0.0140198
ZBED8	ENSG00000221886	2.05745	1.04086	2.74407e-08	5.11599e-07
FBLN2	ENSG00000163520	2.05743	1.04085	1.88282e-07	2.77458e-06
PRSS12	ENSG00000164099	2.05594	1.0398	0.000277279	0.00159382
NEK2	ENSG00000117650	2.05594	1.0398	2.37524e-09	6.04059e-08
CUL5	ENSG00000166266	2.05591	1.03978	4.30262e-09	1.01615e-07
PRSS22	ENSG00000005001	2.05482	1.03901	0.00206158	0.00914023
CD164	ENSG00000135535	2.05446	1.03876	3.49363e-11	1.45669e-09
ARL6	ENSG00000113966	2.05325	1.03791	8.6857e-06	7.74442e-05
TIGD7	ENSG00000140993	2.05287	1.03765	0.00617677	0.0236381
ZDHHC17	ENSG00000186908	2.05081	1.0362	3.40205e-05	0.000254238
BNIP2	ENSG00000140299	2.05038	1.03589	3.46935e-09	8.34001e-08
CCDC171	ENSG00000164989	2.04965	1.03537	0.00104391	0.00509519
BCL11A	ENSG00000119866	2.0485	1.03457	3.26373e-06	3.29204e-05
DST	ENSG00000151914	2.04764	1.03396	3.46461e-08	6.23776e-07
MOB1B	ENSG00000173542	2.04732	1.03374	8.57885e-07	1.03461e-05
SYNM	ENSG00000182253	2.04579	1.03266	9.0486e-09	1.95266e-07
AP5M1	ENSG00000053770	2.04388	1.03131	1.13101e-08	2.34204e-07
MEF2A	ENSG00000068305	2.04363	1.03113	1.56641e-11	7.1504e-10
FAM8A1	ENSG00000137414	2.04312	1.03077	3.92226e-09	9.36598e-08
ZNF277	ENSG00000198839	2.04294	1.03065	2.11658e-09	5.49978e-08
ZFP37	ENSG00000136866	2.04259	1.0304	2.10085e-05	0.000167036
CREG1	ENSG00000143162	2.04103	1.02929	8.0663e-11	3.05121e-09
PAPLN	ENSG00000100767	2.04086	1.02918	0.000885066	0.00440689
ZNF566	ENSG00000186017	2.04005	1.0286	0.000216957	0.00128343
JAK2	ENSG00000096968	2.04	1.02857	1.38481e-05	0.000116111
ERAP2	ENSG00000164308	2.03809	1.02722	9.68754e-10	2.74608e-08
ZNF280D	ENSG00000137871	2.03752	1.02681	7.88765e-06	7.11244e-05
ZBED9	ENSG00000232040	2.03744	1.02676	4.91906e-06	4.69745e-05
ZHX1	ENSG00000165156	2.0371	1.02652	1.18136e-08	2.43225e-07
ARID4A	ENSG00000032219	2.03643	1.02604	2.92879e-05	0.000223463
ATXN3	ENSG00000066427	2.03635	1.02598	1.6605e-09	4.44947e-08
COPS2	ENSG00000166200	2.03516	1.02514	3.81229e-08	6.77303e-07
USP37	ENSG00000135913	2.03303	1.02363	1.5324e-10	5.40001e-09
GMFB	ENSG00000197045	2.03288	1.02352	3.04518e-08	5.60615e-07
UBL3	ENSG00000122042	2.03278	1.02346	2.41842e-08	4.56824e-07
BTBD8	ENSG00000189195	2.03239	1.02318	0.00029961	0.00170712
XRN1	ENSG00000114127	2.0314	1.02247	3.57116e-10	1.12825e-08
LAMP2	ENSG00000005893	2.02933	1.021	7.2653e-13	4.85444e-11
SSX2IP	ENSG00000117155	2.02922	1.02093	1.71961e-08	3.39426e-07
SAMD5	ENSG00000203727	2.02738	1.01961	0.00177865	0.00805804
SNX14	ENSG00000135317	2.02507	1.01797	1.0566e-12	6.66649e-11
SEL1L	ENSG00000071537	2.02449	1.01756	9.63499e-11	3.58645e-09
ANKRD65	ENSG00000235098	2.02154	1.01545	0.00120577	0.00578289
STXBP3	ENSG00000116266	2.02138	1.01534	1.33736e-06	1.52079e-05
CPLANE1	ENSG00000197603	2.02117	1.01519	1.19972e-08	2.46534e-07
AK3	ENSG00000147853	2.01955	1.01404	1.70487e-10	5.90666e-09
NUCB2	ENSG00000070081	2.01696	1.01218	1.27487e-05	0.000108372
FAM122C	ENSG00000156500	2.01579	1.01134	0.0133329	0.0459783
ASPM	ENSG00000066279	2.01473	1.01059	7.11479e-06	6.49172e-05
BRCA2	ENSG00000139618	2.01421	1.01022	5.07013e-05	0.000361046
FAM102A	ENSG00000167106	2.01385	1.00996	2.38038e-10	7.96483e-09
TWSG1	ENSG00000128791	2.01334	1.00959	3.29283e-10	1.05549e-08
ZMYM2	ENSG00000121741	2.01298	1.00934	7.26363e-12	3.57613e-10
ZNF709	ENSG00000242852	2.01253	1.00901	0.0125891	0.0438058
THRB	ENSG00000151090	2.01243	1.00894	5.92066e-07	7.47553e-06
GABPA	ENSG00000154727	2.01181	1.0085	6.30991e-09	1.43266e-07
HSD17B11	ENSG00000198189	2.01008	1.00726	0.00315075	0.0132193
ERBIN	ENSG00000112851	2.00977	1.00703	1.47672e-08	2.94182e-07
WASHC4	ENSG00000136051	2.00969	1.00698	5.2705e-09	1.22061e-07
FAT2	ENSG00000086570	2.00896	1.00645	5.83441e-10	1.75563e-08
SLF2	ENSG00000119906	2.00879	1.00632	1.98182e-09	5.18091e-08
TMED7	ENSG00000134970	2.00857	1.00617	3.68302e-10	1.16188e-08
NOTCH1	ENSG00000148400	2.00809	1.00583	6.5028e-10	1.94047e-08
RESF1	ENSG00000174718	2.00447	1.00322	1.01518e-05	8.88697e-05
LSM8	ENSG00000128534	2.00406	1.00293	5.20726e-08	8.85645e-07
ZNF91	ENSG00000167232	2.00402	1.0029	0.00101852	0.00498941
TMEM135	ENSG00000166575	2.0036	1.0026	7.05182e-09	1.56574e-07
MYSM1	ENSG00000162601	2.00243	1.00175	4.70882e-07	6.16617e-06

## Sheet: DN (stiff vs native)
Supplemantary data 3. DEGs in Ctrl-acini in stiff-BM versus native-BM
Gene Name	Ensembl Identifier	Fold change (FC ≤ - 2)	Log fold change	p value (p < 0.05)	FDR p value (p < 0.05)
HIST1H3D	ENSG00000197409	-3144.95	-11.6188	4.01022e-05	0.00029282
HBB	ENSG00000244734	-185.863	-7.53809	1.64313e-13	1.25808e-11
AL034430.1	ENSG00000285508	-143.435	-7.16425	0.0107277	0.0382066
AC009133.6	ENSG00000280893	-107.429	-6.74724	0.0120451	0.0421796
HBA1	ENSG00000206172	-51.6996	-5.69208	3.36118e-09	8.11625e-08
CXCL8	ENSG00000169429	-37.479	-5.22801	1.93276e-07	2.83073e-06
HBA2	ENSG00000188536	-36.1805	-5.17714	2.30677e-10	7.7426e-09
CRCT1	ENSG00000169509	-13.2588	-3.72888	3.88879e-06	3.82043e-05
ADRA1D	ENSG00000171873	-13.1693	-3.71911	4.20389e-06	4.08706e-05
MYO7B	ENSG00000169994	-12.112	-3.59836	0.00102528	0.00502025
AC023055.1	ENSG00000257390	-11.4421	-3.51628	0.00427744	0.0172289
KRT81	ENSG00000205426	-9.53898	-3.25384	0.00211247	0.00934221
AP001781.2	ENSG00000258529	-9.47648	-3.24435	0.00316163	0.0132598
MRGPRX3	ENSG00000179826	-7.57215	-2.9207	6.05255e-08	1.01418e-06
LCE3D	ENSG00000163202	-6.91203	-2.78911	4.41792e-06	4.27391e-05
NDUFC2-KCTD14	ENSG00000259112	-6.81754	-2.76925	0.000864358	0.00431978
SERPINB2	ENSG00000197632	-6.81522	-2.76876	1.11901e-09	3.09853e-08
IL1B	ENSG00000125538	-6.7507	-2.75504	0	0
FOSL1	ENSG00000175592	-6.72942	-2.75048	0	0
IVL	ENSG00000163207	-6.63467	-2.73002	4.53417e-06	4.37456e-05
CSF3	ENSG00000108342	-6.57868	-2.7178	1.08555e-05	9.42137e-05
DUSP4	ENSG00000120875	-6.54158	-2.70964	0	0
SCO2_2	ENSG00000284194	-6.04879	-2.59665	8.02896e-05	0.000539063
HSPA6	ENSG00000173110	-5.88825	-2.55784	4.12674e-06	4.01568e-05
INSYN2B	ENSG00000204767	-5.8491	-2.54822	1.16591e-06	1.35227e-05
GRAMD1B	ENSG00000023171	-5.72968	-2.51845	8.83442e-11	3.30953e-09
KRT6B	ENSG00000185479	-5.67524	-2.50468	0	0
RHCG	ENSG00000140519	-5.58761	-2.48223	0.00156409	0.00722445
ZBED2	ENSG00000177494	-5.43168	-2.4414	0	0
PLCB2	ENSG00000137841	-5.3825	-2.42828	6.0032e-06	5.5744e-05
PI3	ENSG00000124102	-5.32027	-2.4115	0	0
ID4	ENSG00000172201	-5.09157	-2.34811	0.0059178	0.0227848
IFI27	ENSG00000165949	-5.06048	-2.33927	0.0054033	0.0210869
SH2D2A	ENSG00000027869	-5.05964	-2.33903	0	0
WNT10B	ENSG00000169884	-5.02541	-2.32924	8.33833e-06	7.47185e-05
AC026464.4	ENSG00000260914	-5.00337	-2.3229	0	0
HES5	ENSG00000197921	-4.9778	-2.31551	3.58447e-07	4.86254e-06
QRFPR	ENSG00000186867	-4.97213	-2.31387	0.000628848	0.00325781
ROBO4	ENSG00000154133	-4.92027	-2.29874	5.84815e-07	7.39266e-06
FZD9	ENSG00000188763	-4.91022	-2.29579	2.24862e-08	4.29655e-07
CITED4	ENSG00000179862	-4.76867	-2.25359	0	0
CDC42EP2	ENSG00000149798	-4.75674	-2.24997	6.17635e-11	2.41608e-09
RAPGEF3	ENSG00000079337	-4.75527	-2.24953	9.4369e-14	7.6043e-12
PTHLH	ENSG00000087494	-4.70937	-2.23554	9.28424e-12	4.48877e-10
AL662899.2	ENSG00000263020	-4.58176	-2.1959	0.00160605	0.007399
NAV3	ENSG00000067798	-4.52663	-2.17844	0	0
HS3ST2	ENSG00000122254	-4.49187	-2.16732	1.33071e-07	2.04355e-06
INSC	ENSG00000188487	-4.3142	-2.10909	0.000550619	0.00289647
OSBP2	ENSG00000184792	-4.29251	-2.10182	0	0
INHBA	ENSG00000122641	-4.27876	-2.09719	2.09832e-14	1.95435e-12
IL32	ENSG00000008517	-4.19035	-2.06707	2.57202e-05	0.000199485
ALPP	ENSG00000163283	-4.14319	-2.05074	0.00416452	0.0168262
PGBD5	ENSG00000177614	-4.08712	-2.03109	0.000135224	0.000850686
NCF2	ENSG00000116701	-4.07315	-2.02614	0.000370445	0.00205098
A2ML1	ENSG00000166535	-4.04025	-2.01445	5.75474e-05	0.0004033
AP000646.1	ENSG00000285509	-4.03013	-2.01083	0.00566541	0.0219387
PRSS3	ENSG00000010438	-4.00224	-2.00081	0	0
RASD1	ENSG00000108551	-3.98298	-1.99385	0.00505242	0.019858
GSDMA	ENSG00000167914	-3.98163	-1.99336	0.00840495	0.0308746
DDN	ENSG00000181418	-3.92058	-1.97107	3.44169e-15	3.98107e-13
FZD8	ENSG00000177283	-3.90322	-1.96466	0	0
AC135050.2	ENSG00000255439	-3.89636	-1.96213	0.0018511	0.00833171
SMTN	ENSG00000183963	-3.84223	-1.94195	0	0
DUSP2	ENSG00000158050	-3.81185	-1.93049	4.52509e-09	1.06416e-07
SYT5	ENSG00000129990	-3.80712	-1.9287	0.00230923	0.0101105
HS3ST3A1	ENSG00000153976	-3.7785	-1.91781	6.79057e-09	1.51712e-07
ZNF320	ENSG00000182986	-3.75292	-1.90801	0.000419535	0.00228095
CCDC86	ENSG00000110104	-3.7439	-1.90454	0	0
FST	ENSG00000134363	-3.74043	-1.9032	6.70575e-14	5.63571e-12
AC008575.1	ENSG00000258864	-3.73348	-1.90052	4.98938e-05	0.000355923
CWH43	ENSG00000109182	-3.72086	-1.89564	0.0104148	0.0372216
AL391650.1	ENSG00000236782	-3.68138	-1.88025	0.000434872	0.00235793
GREM1	ENSG00000166923	-3.66431	-1.87354	0.000485089	0.00259425
HS3ST1	ENSG00000002587	-3.62132	-1.85652	0	0
MSX1	ENSG00000163132	-3.61782	-1.85512	0.00203453	0.00903278
MARCH4	ENSG00000144583	-3.61305	-1.85322	6.01833e-07	7.57661e-06
NGF	ENSG00000134259	-3.59794	-1.84717	0.00233092	0.0101868
EN2	ENSG00000164778	-3.57078	-1.83624	0.0014728	0.00686319
TNFAIP3	ENSG00000118503	-3.56958	-1.83575	0	0
NAT8L	ENSG00000185818	-3.55282	-1.82897	4.11393e-12	2.16939e-10
F3	ENSG00000117525	-3.54842	-1.82718	3.29625e-13	2.31006e-11
LRRC10B	ENSG00000204950	-3.54515	-1.82585	0.0113229	0.0400416
SNAI1	ENSG00000124216	-3.52571	-1.81791	0.000305911	0.00173796
SPHK1	ENSG00000176170	-3.51449	-1.81332	0	0
FAM20C	ENSG00000177706	-3.51226	-1.8124	0	0
AL049629.2	ENSG00000284969	-3.51203	-1.81231	0.000117427	0.000752586
G0S2	ENSG00000123689	-3.51078	-1.81179	1.0183e-05	8.90645e-05
SPRY4	ENSG00000187678	-3.45918	-1.79043	0	0
DUSP5	ENSG00000138166	-3.44838	-1.78592	0	0
TMEM171	ENSG00000157111	-3.44228	-1.78336	6.73786e-05	0.00046374
ADAM8	ENSG00000151651	-3.41535	-1.77203	0	0
BMP6	ENSG00000153162	-3.4134	-1.77121	5.43431e-10	1.64907e-08
ATAD3B	ENSG00000160072	-3.40719	-1.76858	0	0
SPRR1B	ENSG00000169469	-3.36502	-1.75061	1.26905e-06	1.45775e-05
CXCL1	ENSG00000163739	-3.3493	-1.74386	0.0059988	0.0230435
SLAMF9	ENSG00000162723	-3.28847	-1.71742	0.0121039	0.042337
PHLDA1	ENSG00000139289	-3.25242	-1.70151	0	0
TUBAL3	ENSG00000178462	-3.23412	-1.69337	0.012037	0.0421578
RNASE7	ENSG00000165799	-3.20907	-1.68216	7.69492e-07	9.38527e-06
PIK3AP1	ENSG00000155629	-3.19375	-1.67525	0.00185228	0.00833372
HKDC1	ENSG00000156510	-3.1927	-1.67478	0.000371369	0.00205504
SPRR2A	ENSG00000241794	-3.18869	-1.67296	0.00324677	0.013585
SH2D5	ENSG00000189410	-3.18788	-1.6726	4.44089e-16	6.63512e-14
HAS3	ENSG00000103044	-3.18652	-1.67198	0	0
UPP1	ENSG00000183696	-3.17169	-1.66525	0	0
XDH	ENSG00000158125	-3.15907	-1.6595	0	0
SDCBP2	ENSG00000125775	-3.15755	-1.6588	0	0
CDA	ENSG00000158825	-3.15556	-1.6579	1.29858e-05	0.00011017
KRT75	ENSG00000170454	-3.14577	-1.65341	2.16559e-06	2.30087e-05
EPHA2	ENSG00000142627	-3.1325	-1.64732	0	0
KRT6A	ENSG00000205420	-3.12392	-1.64336	0	0
MICAL2	ENSG00000133816	-3.12341	-1.64312	2.22045e-16	3.51271e-14
MAFF	ENSG00000185022	-3.11866	-1.64093	0	0
KANK4	ENSG00000132854	-3.11816	-1.64069	4.69081e-06	4.51556e-05
KLK10	ENSG00000129451	-3.10595	-1.63503	1.30677e-05	0.000110646
CCDC103	ENSG00000167131	-3.09705	-1.6309	0.00431343	0.0173464
COL13A1	ENSG00000197467	-3.09262	-1.62883	1.44464e-08	2.89129e-07
KRT6C	ENSG00000170465	-3.07433	-1.62027	3.02597e-10	9.81958e-09
ANGPTL4	ENSG00000167772	-3.0672	-1.61692	9.32023e-08	1.492e-06
CAPN12	ENSG00000182472	-3.04966	-1.60865	0.00634604	0.024204
DUSP6	ENSG00000139318	-3.04805	-1.60789	0	0
FOXF2	ENSG00000137273	-3.0441	-1.60602	7.43615e-10	2.18564e-08
FNDC11	ENSG00000125531	-3.04186	-1.60495	5.70354e-06	5.33529e-05
SPRR2E	ENSG00000203785	-3.03064	-1.59962	0.00120708	0.00578792
SEMA7A	ENSG00000138623	-3.01999	-1.59454	3.76366e-14	3.29167e-12
SPRR2D	ENSG00000163216	-3.01734	-1.59328	0.000181755	0.00110185
GJB4	ENSG00000189433	-3.00861	-1.5891	3.62307e-07	4.9118e-06
SH3TC2	ENSG00000169247	-3.00594	-1.58781	4.44089e-16	6.63512e-14
MYEOV	ENSG00000172927	-2.97982	-1.57522	5.44009e-14	4.67302e-12
ADAM19	ENSG00000135074	-2.97713	-1.57392	6.27525e-08	1.04742e-06
GJB3	ENSG00000188910	-2.97146	-1.57117	0	0
PTGES	ENSG00000148344	-2.96985	-1.57039	0	0
KCNJ12	ENSG00000184185	-2.96696	-1.56899	9.89288e-07	1.16309e-05
HBQ1	ENSG00000086506	-2.96159	-1.56637	0.01034	0.0369726
TMEM92	ENSG00000167105	-2.95493	-1.56312	0.000348683	0.00194315
DMBT1	ENSG00000187908	-2.94842	-1.55994	0.00736695	0.0275221
MFAP2	ENSG00000117122	-2.94767	-1.55958	0.00513717	0.020147
ALOX15B	ENSG00000179593	-2.94162	-1.55661	0.00277565	0.0118488
MMP3	ENSG00000149968	-2.93687	-1.55428	0.000413128	0.00225366
GAL	ENSG00000069482	-2.8977	-1.53491	1.91902e-12	1.15008e-10
TGM2	ENSG00000198959	-2.89172	-1.53193	1.85178e-05	0.000149722
MED24	ENSG00000008838	-2.8901	-1.53112	0	0
IRAK2	ENSG00000134070	-2.88409	-1.52811	0	0
SLCO4A1	ENSG00000101187	-2.87262	-1.52237	0	0
THBS1	ENSG00000137801	-2.85211	-1.51203	7.35833e-10	2.16572e-08
FAM89A	ENSG00000182118	-2.84725	-1.50957	1.66067e-09	4.44947e-08
RAB3IL1	ENSG00000167994	-2.83957	-1.50568	8.03975e-10	2.33563e-08
LHX5	ENSG00000089116	-2.82725	-1.4994	0.00027405	0.00157821
AL139353.1	ENSG00000203546	-2.82348	-1.49747	0.000263753	0.00152462
NIPAL4	ENSG00000172548	-2.81316	-1.49219	2.14476e-10	7.28981e-09
NRCAM	ENSG00000091129	-2.811	-1.49108	0.0029242	0.0123847
PYCR3	ENSG00000104524	-2.80949	-1.49031	0	0
IL13RA2	ENSG00000123496	-2.80725	-1.48916	9.58527e-06	8.44155e-05
TTLL11	ENSG00000175764	-2.78988	-1.4802	0	0
TBC1D30	ENSG00000111490	-2.78382	-1.47706	1.8666e-11	8.29748e-10
PRDM8	ENSG00000152784	-2.78274	-1.47651	4.88972e-08	8.42293e-07
ACTL10	ENSG00000182584	-2.75817	-1.46371	1.0032e-08	2.14125e-07
BCAR3	ENSG00000137936	-2.75757	-1.4634	0	0
KBTBD11	ENSG00000176595	-2.74564	-1.45714	1.3872e-08	2.7841e-07
TRABD2A	ENSG00000186854	-2.73576	-1.45194	1.49894e-05	0.000124709
TNFRSF6B	ENSG00000243509	-2.73006	-1.44893	1.9984e-15	2.45689e-13
PLAUR	ENSG00000011422	-2.72945	-1.44861	0	0
ODC1	ENSG00000115758	-2.72659	-1.4471	0	0
BCL2L1	ENSG00000171552	-2.71211	-1.43941	0	0
IFI6	ENSG00000126709	-2.71081	-1.43873	0.000518002	0.0027457
TGFA	ENSG00000163235	-2.70796	-1.4372	0	0
S100P	ENSG00000163993	-2.69988	-1.43289	4.77914e-10	1.47007e-08
DHRS2	ENSG00000100867	-2.69886	-1.43235	2.75612e-05	0.000211778
FCMR	ENSG00000162894	-2.69699	-1.43135	0.00127398	0.0060681
FOXC2	ENSG00000176692	-2.69612	-1.43089	1.48637e-05	0.000123806
SH2D3A	ENSG00000125731	-2.69398	-1.42974	0	0
MESP1	ENSG00000166823	-2.68347	-1.4241	5.58099e-05	0.000392274
RFTN1	ENSG00000131378	-2.67142	-1.41761	4.41422e-10	1.37045e-08
EHD1	ENSG00000110047	-2.65322	-1.40775	0	0
RCN3	ENSG00000142552	-2.64736	-1.40455	0.00460143	0.0183605
ANTXR2	ENSG00000163297	-2.64658	-1.40413	5.23914e-13	3.55584e-11
CYP24A1	ENSG00000019186	-2.64623	-1.40394	9.77657e-08	1.54892e-06
SNCB	ENSG00000074317	-2.64028	-1.40069	1.95234e-05	0.000156968
AEN	ENSG00000181026	-2.63591	-1.3983	0	0
GNA15	ENSG00000060558	-2.632	-1.39616	0	0
EEF1AKMT4	ENSG00000284753	-2.61223	-1.38528	2.57017e-13	1.86815e-11
OR2W3	ENSG00000238243	-2.61042	-1.38428	0.00152707	0.0070854
CCDC9B	ENSG00000188549	-2.60895	-1.38347	0	0
KIAA0040	ENSG00000235750	-2.57762	-1.36604	0	0
NOL6	ENSG00000165271	-2.57625	-1.36527	1.11022e-16	1.79597e-14
CYP27B1	ENSG00000111012	-2.5712	-1.36244	0	0
KCNJ15	ENSG00000157551	-2.57046	-1.36203	0.00246126	0.0106655
UFSP1	ENSG00000176125	-2.56765	-1.36045	3.27844e-05	0.000246714
SOX9	ENSG00000125398	-2.56585	-1.35943	2.39808e-13	1.76694e-11
PPAN	ENSG00000130810	-2.56106	-1.35674	0	0
NOP16	ENSG00000048162	-2.55726	-1.3546	2.10942e-15	2.54968e-13
PLEKHN1	ENSG00000187583	-2.55686	-1.35437	2.70775e-11	1.15819e-09
DLL4	ENSG00000128917	-2.5516	-1.3514	0.00180005	0.00813271
HPDL	ENSG00000186603	-2.54743	-1.34904	2.25516e-10	7.60497e-09
IL1A	ENSG00000115008	-2.53956	-1.34458	2.57186e-11	1.10226e-09
APC2	ENSG00000115266	-2.53838	-1.34391	3.95017e-13	2.74155e-11
FAM83A	ENSG00000147689	-2.53396	-1.34139	0	0
STX1A	ENSG00000106089	-2.53362	-1.3412	5.15865e-11	2.06682e-09
HTR7	ENSG00000148680	-2.52676	-1.33729	7.23742e-09	1.5987e-07
SCO2_1	ENSG00000130489	-2.52	-1.33342	1.46483e-08	2.92355e-07
HIC1	ENSG00000177374	-2.51626	-1.33128	2.65535e-05	0.000205134
SSSCA1	ENSG00000173465	-2.51219	-1.32894	1.11022e-16	1.79597e-14
PHLDA2	ENSG00000181649	-2.50605	-1.32541	7.60059e-13	5.06274e-11
PGF	ENSG00000119630	-2.50437	-1.32445	0	0
HMGA2	ENSG00000149948	-2.49857	-1.3211	2.38063e-07	3.37858e-06
PLK3	ENSG00000173846	-2.4962	-1.31973	0	0
AC021087.5	ENSG00000286001	-2.4951	-1.3191	2.34382e-06	2.47224e-05
KIAA1549L	ENSG00000110427	-2.49359	-1.31822	3.52218e-12	1.89924e-10
ARNT2	ENSG00000172379	-2.49301	-1.31789	0.000191143	0.00114873
CSNK1E	ENSG00000213923	-2.49007	-1.31619	0	0
ID1	ENSG00000125968	-2.48752	-1.31471	2.33369e-13	1.72541e-11
GPSM3	ENSG00000213654	-2.48582	-1.31372	1.59998e-05	0.000131942
VEGFC	ENSG00000150630	-2.48526	-1.3134	2.57572e-14	2.36823e-12
JUN	ENSG00000177606	-2.48242	-1.31175	1.0314e-13	8.15828e-12
SLPI	ENSG00000124107	-2.48058	-1.31068	1.77636e-15	2.20915e-13
NAGS	ENSG00000161653	-2.47889	-1.30969	2.08584e-11	9.08439e-10
FOXD1	ENSG00000251493	-2.47816	-1.30927	1.11022e-16	1.79597e-14
IGSF9B	ENSG00000080854	-2.47283	-1.30616	5.22679e-06	4.9474e-05
CTXN1	ENSG00000178531	-2.47068	-1.30491	2.2853e-09	5.84641e-08
RRP9	ENSG00000114767	-2.46856	-1.30367	7.54952e-15	7.84676e-13
ETS1	ENSG00000134954	-2.46849	-1.30363	2.16804e-12	1.27447e-10
BMP2	ENSG00000125845	-2.46199	-1.29983	1.73096e-09	4.60341e-08
MARS2	ENSG00000247626	-2.45847	-1.29776	1.11022e-15	1.43894e-13
TWNK	ENSG00000107815	-2.45514	-1.29581	2.9976e-15	3.50508e-13
CCDC85B	ENSG00000175602	-2.4546	-1.29549	1.04361e-14	1.03471e-12
CDH11	ENSG00000140937	-2.45232	-1.29415	5.94839e-07	7.49735e-06
PERM1	ENSG00000187642	-2.44348	-1.28894	0.000330678	0.00185627
SLC20A1	ENSG00000144136	-2.44238	-1.28829	4.77396e-15	5.34957e-13
LETM2	ENSG00000165046	-2.43824	-1.28584	7.68756e-09	1.68814e-07
CTU1	ENSG00000142544	-2.4345	-1.28363	1.79902e-11	8.04695e-10
SLC45A3	ENSG00000158715	-2.4287	-1.28019	5.65234e-09	1.29925e-07
SERPINB8	ENSG00000166401	-2.42757	-1.27951	2.22045e-16	3.51271e-14
CXCL2	ENSG00000081041	-2.41897	-1.27439	4.15428e-05	0.000302366
DKK1	ENSG00000107984	-2.41619	-1.27273	2.37588e-14	2.19386e-12
MGLL	ENSG00000074416	-2.41593	-1.27258	5.10703e-15	5.6638e-13
FJX1	ENSG00000179431	-2.40962	-1.26881	1.27676e-14	1.23181e-12
SMOC1	ENSG00000198732	-2.40569	-1.26645	6.36556e-07	7.93943e-06
RRP12	ENSG00000052749	-2.40232	-1.26443	7.77156e-16	1.09284e-13
NOP2	ENSG00000111641	-2.39977	-1.26289	0	0
PRR5	ENSG00000186654	-2.3983	-1.26201	2.40924e-08	4.55491e-07
BOP1	ENSG00000261236	-2.39332	-1.25901	1.77636e-15	2.20915e-13
S100A9	ENSG00000163220	-2.39193	-1.25818	4.81758e-10	1.4765e-08
F8A3	ENSG00000277150	-2.38759	-1.25556	0.0132751	0.0458302
PRDM12	ENSG00000130711	-2.38565	-1.25438	0.00284642	0.0121173
C11orf68	ENSG00000175573	-2.38117	-1.25167	1.66533e-15	2.10763e-13
IER3	ENSG00000137331	-2.3797	-1.25078	0	0
NTSR1	ENSG00000101188	-2.37612	-1.24861	6.99441e-15	7.30508e-13
SPRED3	ENSG00000188766	-2.37301	-1.24672	8.59148e-08	1.38982e-06
CDYL2	ENSG00000166446	-2.36935	-1.24449	0.00692455	0.0261142
HYI	ENSG00000178922	-2.36901	-1.24428	3.37952e-13	2.36073e-11
PALD1	ENSG00000107719	-2.3668	-1.24294	3.33968e-05	0.000250622
GJB5	ENSG00000189280	-2.36242	-1.24027	0	0
DSCAM	ENSG00000171587	-2.35834	-1.23777	9.36278e-08	1.49547e-06
AC006538.2	ENSG00000267001	-2.35715	-1.23705	0.00979632	0.0352691
PREX1	ENSG00000124126	-2.35491	-1.23567	9.65423e-05	0.000633072
FOXQ1	ENSG00000164379	-2.35467	-1.23552	4.08629e-12	2.16011e-10
CHD5	ENSG00000116254	-2.34989	-1.23259	2.09453e-06	2.24645e-05
LAMC2	ENSG00000058085	-2.34977	-1.23252	5.59508e-12	2.83911e-10
SCARF2	ENSG00000244486	-2.34729	-1.231	0.000520433	0.0027552
AC118754.1	ENSG00000183018	-2.34559	-1.22995	0.00182085	0.00821465
AC008012.1	ENSG00000285901	-2.34305	-1.22839	0.00161235	0.00741707
ZNHIT2	ENSG00000174276	-2.34055	-1.22685	6.97331e-13	4.68846e-11
NR1D1	ENSG00000126368	-2.33885	-1.2258	3.49942e-12	1.89171e-10
SLC39A4	ENSG00000147804	-2.3379	-1.22522	1.16234e-10	4.21717e-09
S100A8	ENSG00000143546	-2.3337	-1.22262	0.0001333	0.000840795
RRP1	ENSG00000160214	-2.33352	-1.22251	0	0
STEAP1	ENSG00000164647	-2.33134	-1.22116	1.87729e-07	2.77022e-06
NOG	ENSG00000183691	-2.33056	-1.22068	6.31648e-07	7.88735e-06
FGF5	ENSG00000138675	-2.32618	-1.21796	0.00401799	0.0163416
N4BP3	ENSG00000145911	-2.326	-1.21785	8.21565e-15	8.41713e-13
ZNF593	ENSG00000142684	-2.3238	-1.21648	1.90714e-12	1.14615e-10
TUBB3	ENSG00000258947	-2.32358	-1.21635	0	0
IMP4	ENSG00000136718	-2.32279	-1.21586	0	0
PDCD2L	ENSG00000126249	-2.32208	-1.21542	1.88738e-15	2.33373e-13
CCN2	ENSG00000118523	-2.31695	-1.21223	0.000129694	0.000821182
FCRLB	ENSG00000162746	-2.31216	-1.20924	0.000152816	0.000946683
MON1A	ENSG00000164077	-2.31195	-1.20911	7.30527e-14	6.04511e-12
LY6K	ENSG00000160886	-2.31149	-1.20882	2.22045e-16	3.51271e-14
ECM1	ENSG00000143369	-2.3096	-1.20764	1.96992e-11	8.63196e-10
RRS1	ENSG00000179041	-2.30284	-1.20341	5.32907e-15	5.87974e-13
CHST2	ENSG00000175040	-2.30266	-1.2033	3.91231e-06	3.83696e-05
GPRC5A	ENSG00000013588	-2.30198	-1.20288	0	0
GPR3	ENSG00000181773	-2.30017	-1.20174	6.91286e-07	8.56741e-06
DLL3	ENSG00000090932	-2.2962	-1.19925	2.42865e-07	3.43766e-06
RRP7A	ENSG00000189306	-2.29381	-1.19775	8.10463e-15	8.38322e-13
SHB	ENSG00000107338	-2.28961	-1.1951	6.10623e-15	6.66881e-13
BYSL	ENSG00000112578	-2.28841	-1.19435	9.99201e-16	1.31084e-13
SYS1-DBNDD2	ENSG00000254806	-2.28431	-1.19176	0.004678	0.0186384
CEACAM1	ENSG00000079385	-2.27944	-1.18868	0.00437741	0.0175742
DISP2	ENSG00000140323	-2.27773	-1.1876	5.12779e-06	4.86225e-05
MRTO4	ENSG00000053372	-2.27243	-1.18424	0	0
VGF	ENSG00000128564	-2.27179	-1.18383	5.44963e-09	1.25669e-07
DHX34	ENSG00000134815	-2.27145	-1.18362	2.23876e-12	1.30303e-10
LRRC3	ENSG00000160233	-2.27089	-1.18326	4.20861e-08	7.38566e-07
FGFBP1	ENSG00000137440	-2.26944	-1.18234	1.11022e-16	1.79597e-14
FLNB	ENSG00000136068	-2.26757	-1.18115	1.39888e-14	1.33764e-12
MRM1	ENSG00000278619	-2.26723	-1.18093	5.18695e-11	2.0743e-09
HBEGF	ENSG00000113070	-2.26213	-1.17768	9.99201e-16	1.31084e-13
DPH2	ENSG00000132768	-2.26124	-1.17712	3.59712e-14	3.17181e-12
KLF7	ENSG00000118263	-2.261	-1.17696	7.10543e-14	5.92532e-12
CARMIL2	ENSG00000159753	-2.2606	-1.17671	6.25822e-07	7.82369e-06
TNS4	ENSG00000131746	-2.25815	-1.17514	0	0
IKZF3	ENSG00000161405	-2.2545	-1.17281	0.00103508	0.00505901
PPRC1	ENSG00000148840	-2.25275	-1.17169	3.747e-13	2.60896e-11
ETV4	ENSG00000175832	-2.24075	-1.16398	1.32783e-13	1.02395e-11
TMEM158	ENSG00000249992	-2.23171	-1.15815	1.9847e-07	2.89694e-06
CXCL3	ENSG00000163734	-2.23101	-1.1577	0.0139883	0.047931
GOLGA7B	ENSG00000155265	-2.22971	-1.15685	0.00632904	0.0241435
AC120114.4	ENSG00000281348	-2.22899	-1.15639	0.0010067	0.0049371
PHC2	ENSG00000134686	-2.22587	-1.15437	8.88178e-16	1.19432e-13
HS3ST3B1	ENSG00000125430	-2.22182	-1.15174	6.65234e-05	0.000458441
DLX2	ENSG00000115844	-2.22157	-1.15158	1.78209e-06	1.95821e-05
HIST2H2AA3	ENSG00000203812	-2.21105	-1.14473	1.02766e-05	8.98053e-05
AKAP2	ENSG00000241978	-2.21083	-1.14459	1.33406e-10	4.79972e-09
PMF1-BGLAP	ENSG00000260238	-2.21017	-1.14416	0.00944118	0.0341332
GRWD1	ENSG00000105447	-2.20968	-1.14384	4.44089e-16	6.63512e-14
LHX6	ENSG00000106852	-2.20883	-1.14328	9.64462e-12	4.63178e-10
IFRD2	ENSG00000214706	-2.20846	-1.14304	1.07692e-14	1.05798e-12
TGM1	ENSG00000092295	-2.20466	-1.14056	0.00163343	0.00749965
NTMT1	ENSG00000148335	-2.20371	-1.13993	1.02807e-13	8.15828e-12
DNMBP	ENSG00000107554	-2.20368	-1.13992	3.44593e-11	1.4396e-09
SRM	ENSG00000116649	-2.20113	-1.13825	2.64011e-13	1.91252e-11
YRDC	ENSG00000196449	-2.19776	-1.13603	0	0
KLC3	ENSG00000104892	-2.1973	-1.13573	3.63043e-14	3.18811e-12
URB2	ENSG00000135763	-2.19547	-1.13453	8.04357e-13	5.2601e-11
KLF16	ENSG00000129911	-2.19273	-1.13273	6.54476e-13	4.41413e-11
IER2	ENSG00000160888	-2.1907	-1.13139	5.06262e-14	4.37439e-12
ABHD11	ENSG00000106077	-2.18898	-1.13026	1.74393e-11	7.8495e-10
MALL	ENSG00000144063	-2.18539	-1.12789	0	0
PTRH1	ENSG00000187024	-2.18465	-1.12741	2.22711e-12	1.30207e-10
EGR3	ENSG00000179388	-2.18385	-1.12687	0.00270041	0.0115437
TICAM1	ENSG00000127666	-2.1809	-1.12492	7.92033e-13	5.22288e-11
POPDC3	ENSG00000132429	-2.18041	-1.1246	0.00574397	0.022195
TWIST2	ENSG00000233608	-2.17416	-1.12046	8.80266e-10	2.51179e-08
PLEK2	ENSG00000100558	-2.16966	-1.11747	0	0
HMOX2	ENSG00000103415	-2.16744	-1.11599	0	0
CARD11	ENSG00000198286	-2.16383	-1.11358	2.6646e-10	8.79277e-09
JMJD4	ENSG00000081692	-2.16333	-1.11325	1.93956e-13	1.4642e-11
ATAD3A	ENSG00000197785	-2.15687	-1.10894	1.85996e-12	1.12092e-10
MAFK	ENSG00000198517	-2.15313	-1.10644	1.91069e-13	1.44749e-11
AP003419.1	ENSG00000256514	-2.15253	-1.10603	0.0125126	0.043554
DUSP7	ENSG00000164086	-2.14589	-1.10157	0	0
YDJC	ENSG00000161179	-2.1443	-1.1005	1.55952e-11	7.14322e-10
LRWD1	ENSG00000161036	-2.1433	-1.09984	2.90323e-13	2.07518e-11
FAM207A	ENSG00000160256	-2.13965	-1.09737	2.32707e-08	4.43071e-07
C19orf24	ENSG00000228300	-2.13805	-1.0963	1.23238e-11	5.73911e-10
TNFRSF12A	ENSG00000006327	-2.1367	-1.09538	1.00209e-12	6.35985e-11
FP565260.1	ENSG00000275464	-2.12839	-1.08976	0	0
POLM	ENSG00000122678	-2.12836	-1.08974	1.07014e-12	6.73221e-11
SPRYD3	ENSG00000167778	-2.12654	-1.08851	0	0
HSPA8	ENSG00000109971	-2.12626	-1.08832	4.44089e-16	6.63512e-14
LENG9	ENSG00000275183	-2.12427	-1.08697	1.06642e-10	3.90204e-09
TMEM265	ENSG00000281991	-2.12404	-1.08681	1.13306e-06	1.317e-05
ASB1	ENSG00000065802	-2.12058	-1.08446	0	0
MAPKAPK3	ENSG00000114738	-2.11946	-1.0837	1.11022e-16	1.79597e-14
MDFI	ENSG00000112559	-2.11935	-1.08362	4.48797e-12	2.34365e-10
PDLIM2	ENSG00000120913	-2.11809	-1.08276	3.82439e-12	2.04173e-10
CASP14	ENSG00000105141	-2.11791	-1.08264	4.15437e-10	1.29915e-08
ENTR1	ENSG00000165689	-2.11538	-1.08091	0	0
AC011481.1	ENSG00000130204	-2.11388	-1.07989	8.81517e-14	7.18403e-12
FAM86C1	ENSG00000158483	-2.11248	-1.07894	1.06405e-08	2.24002e-07
ZFP36L1	ENSG00000185650	-2.11147	-1.07824	3.08303e-09	7.53142e-08
CD3EAP	ENSG00000117877	-2.1084	-1.07615	6.59128e-12	3.30563e-10
TRMT61A	ENSG00000166166	-2.10814	-1.07597	2.52951e-10	8.39853e-09
PXN	ENSG00000089159	-2.1074	-1.07546	2.16938e-13	1.62063e-11
DDX51	ENSG00000185163	-2.10715	-1.07529	3.16414e-14	2.81307e-12
FARSA	ENSG00000179115	-2.10418	-1.07326	6.77236e-15	7.10767e-13
AOX1	ENSG00000138356	-2.10075	-1.07091	8.25892e-08	1.34208e-06
PES1	ENSG00000100029	-2.10058	-1.07079	5.55112e-16	8.06975e-14
ISG20L2	ENSG00000143319	-2.09685	-1.06823	1.11022e-16	1.79597e-14
MAP3K9	ENSG00000006432	-2.09582	-1.06751	3.3107e-10	1.05839e-08
ARMC6	ENSG00000105676	-2.09573	-1.06745	3.08531e-13	2.19077e-11
ARHGDIA	ENSG00000141522	-2.09524	-1.06712	1.13054e-12	7.05516e-11
HOXC11	ENSG00000123388	-2.09314	-1.06567	0.00158621	0.00731561
TNFRSF10A	ENSG00000104689	-2.09255	-1.06526	0	0
ROBO3	ENSG00000154134	-2.08855	-1.0625	4.55302e-13	3.10979e-11
PLXNA2	ENSG00000076356	-2.08797	-1.0621	1.77636e-14	1.66892e-12
MYC	ENSG00000136997	-2.08784	-1.06201	7.9492e-14	6.52775e-12
GPAT3	ENSG00000138678	-2.08729	-1.06163	0.000609271	0.00316783
TNIP1	ENSG00000145901	-2.08701	-1.06144	6.66134e-16	9.55458e-14
TYMP	ENSG00000025708	-2.08628	-1.06093	1.80177e-09	4.75645e-08
C1QTNF1	ENSG00000173918	-2.08273	-1.05848	4.68769e-07	6.14599e-06
RTN2	ENSG00000125744	-2.08163	-1.05772	4.06981e-10	1.27455e-08
EFHD2	ENSG00000142634	-2.07937	-1.05615	1.06359e-13	8.35154e-12
EEF2KMT	ENSG00000118894	-2.07456	-1.05281	4.49496e-08	7.83704e-07
MYBBP1A	ENSG00000132382	-2.07206	-1.05107	2.03348e-12	1.20525e-10
WDR4	ENSG00000160193	-2.07037	-1.04989	4.71845e-14	4.11002e-12
CTU2	ENSG00000174177	-2.06907	-1.04898	3.21496e-10	1.03548e-08
AMIGO2	ENSG00000139211	-2.06784	-1.04812	6.92034e-07	8.57174e-06
ACTN1	ENSG00000072110	-2.06718	-1.04767	1.08136e-13	8.39906e-12
GRK5	ENSG00000198873	-2.06552	-1.04651	3.52867e-10	1.11811e-08
DCTPP1	ENSG00000179958	-2.06551	-1.0465	2.19313e-12	1.2857e-10
LHX1	ENSG00000273706	-2.06531	-1.04636	0.000564325	0.00296277
PNP	ENSG00000198805	-2.06515	-1.04625	0	0
S100A16	ENSG00000188643	-2.06269	-1.04453	0	0
TCOF1	ENSG00000070814	-2.06224	-1.04421	2.69784e-14	2.46996e-12
HIST1H2AL	ENSG00000276903	-2.06147	-1.04367	9.93587e-06	8.71109e-05
PUS1	ENSG00000177192	-2.06138	-1.04361	7.8636e-11	2.98914e-09
P2RX5	ENSG00000083454	-2.06113	-1.04344	1.01687e-09	2.85612e-08
RDH13	ENSG00000160439	-2.06003	-1.04267	4.71168e-11	1.90191e-09
MAP7D1	ENSG00000116871	-2.05915	-1.04205	2.24709e-12	1.30303e-10
CORO1A	ENSG00000102879	-2.05724	-1.04071	5.57342e-08	9.40487e-07
HK2	ENSG00000159399	-2.05678	-1.04038	6.39488e-14	5.41677e-12
CACNA1A	ENSG00000141837	-2.0554	-1.03942	0.00380075	0.0155669
DOHH	ENSG00000129932	-2.05376	-1.03827	3.64316e-11	1.50736e-09
LOXL3	ENSG00000115318	-2.05313	-1.03783	0.00095174	0.00469649
HIST1H3J	ENSG00000197153	-2.0497	-1.03541	3.2739e-05	0.000246459
DLC1	ENSG00000164741	-2.04806	-1.03426	2.39965e-06	2.51969e-05
MARCKSL1	ENSG00000175130	-2.04683	-1.03339	4.13959e-08	7.2888e-07
EOMES	ENSG00000163508	-2.0467	-1.0333	1.70917e-07	2.55366e-06
NOC4L	ENSG00000184967	-2.04631	-1.03303	2.17652e-09	5.62835e-08
NOP56	ENSG00000101361	-2.04186	-1.02988	0	0
FSCN1	ENSG00000075618	-2.04139	-1.02955	1.75779e-11	7.89539e-10
CDC20	ENSG00000117399	-2.04053	-1.02894	8.88178e-16	1.19432e-13
ADRA2C	ENSG00000184160	-2.03912	-1.02795	0.00771999	0.0286569
ZNF696	ENSG00000185730	-2.03879	-1.02771	9.41978e-08	1.50012e-06
ELOVL1	ENSG00000066322	-2.03521	-1.02518	0	0
FAM131C	ENSG00000185519	-2.03504	-1.02506	0.00179093	0.00809662
APBA2	ENSG00000034053	-2.02852	-1.02043	5.06847e-09	1.18018e-07
DOK7	ENSG00000175920	-2.02679	-1.01919	3.19415e-07	4.38279e-06
RHEBL1	ENSG00000167550	-2.02573	-1.01844	6.91202e-07	8.56741e-06
HGS	ENSG00000185359	-2.02573	-1.01844	8.88178e-15	8.92951e-13
TFAP4	ENSG00000090447	-2.02482	-1.01779	3.19567e-12	1.75395e-10
EFR3B	ENSG00000084710	-2.02258	-1.0162	0.00574848	0.0222065
EPOP	ENSG00000273604	-2.02119	-1.01521	7.61613e-14	6.2782e-12
DHX37	ENSG00000150990	-2.02113	-1.01516	2.26383e-11	9.80008e-10
KLC2	ENSG00000174996	-2.02089	-1.01499	1.01618e-11	4.84768e-10
BDKRB1	ENSG00000100739	-2.01528	-1.01098	6.39385e-05	0.000442327
TOR4A	ENSG00000198113	-2.01496	-1.01075	1.05398e-10	3.86967e-09
NSUN5	ENSG00000130305	-2.01381	-1.00993	1.95632e-12	1.16594e-10
CAPN15	ENSG00000103326	-2.01303	-1.00937	1.05241e-09	2.9292e-08
FSTL3	ENSG00000070404	-2.01002	-1.00721	1.25455e-14	1.22134e-12
ADM5	ENSG00000224420	-2.00984	-1.00708	0.00290625	0.0123257
PRR5L	ENSG00000135362	-2.00948	-1.00682	6.79703e-05	0.000467363
ORAI1	ENSG00000276045	-2.00885	-1.00637	5.96319e-09	1.36342e-07
PPIF	ENSG00000108179	-2.00843	-1.00607	0	0
GEMIN4	ENSG00000179409	-2.00843	-1.00607	1.09912e-14	1.07489e-12
GJC2	ENSG00000198835	-2.0079	-1.00569	6.14544e-08	1.02655e-06
NFKBIZ	ENSG00000144802	-2.00594	-1.00428	6.9225e-05	0.00047372
RBM19	ENSG00000122965	-2.00592	-1.00427	8.06943e-11	3.05121e-09
SLC19A1	ENSG00000173638	-2.00468	-1.00337	2.3901e-10	7.98493e-09
POLR3H	ENSG00000100413	-2.00407	-1.00294	2.67963e-12	1.50922e-10
UTP4	ENSG00000141076	-2.00042	-1.0003	3.26517e-13	2.30328e-11
