# Supplementary material for: Endo180 and basement membrane stiffness induce OXPHOS and neoplasia in aging prostate epithelia
Source: Research Square preprint supplement (doi:10.21203/rs.3.rs-4837876/v1), 2024-09-19
Supplement: Supplementary file 2 [file 20a0d9dfeed328a5213eae2a.xlsx]

## Sheet: UP (stiff vs native)
Supplementary data 4. DEGs in Endo180-KO-acini in stiff-BM versus native-BM
Gene Name	Ensembl Identifier	Fold change (FC ≥ 2)	Log fold change	p value (p < 0.05)	FDR p value (p < 0.05)
AC010487.3	ENSG00000283088	73.8495	6.20652	0.00972436	0.0408417
FGF1	ENSG00000113578	31.161	4.96167	3.35612e-06	5.25524e-05
BBOX1	ENSG00000129151	15.9305	3.99372	0.00404358	0.0195944
SULT1E1	ENSG00000109193	15.9059	3.99149	0.00337407	0.0168195
DNAH6	ENSG00000115423	12.8457	3.68322	0.000602235	0.00402144
KIT	ENSG00000157404	11.0198	3.46203	0.00121676	0.00720344
CLDN2	ENSG00000165376	9.27724	3.2137	0.00306281	0.01552
AMT	ENSG00000145020	8.61144	3.10625	0.0023326	0.0124561
DISP3	ENSG00000204624	8.39451	3.06945	0.00556957	0.02555
FIBIN	ENSG00000176971	8.30277	3.05359	3.96396e-06	6.04426e-05
KCNJ2	ENSG00000123700	8.08593	3.01541	4.88492e-10	3.05521e-08
WDR63	ENSG00000162643	8.03065	3.00552	1.30801e-05	0.000163901
KRT15	ENSG00000171346	7.80108	2.96367	0	0
COL6A6	ENSG00000206384	7.20483	2.84897	0.00387217	0.0189068
ZNF429	ENSG00000197013	7.15501	2.83895	2.12186e-07	5.18772e-06
METTL7A	ENSG00000185432	7.13204	2.83431	1.88945e-10	1.36874e-08
AGR2	ENSG00000106541	6.77795	2.76085	1.87006e-12	2.68229e-10
TRPV6	ENSG00000165125	6.71272	2.7469	0.000553922	0.00375713
B3GAT2	ENSG00000112309	6.52677	2.70637	0.00520257	0.0241444
MAP2K6	ENSG00000108984	6.39983	2.67803	6.19726e-13	9.95031e-11
SERPINA3	ENSG00000196136	5.85286	2.54914	0.000739929	0.00475637
SORBS2	ENSG00000154556	5.62352	2.49147	0.012332	0.0495466
XKRX	ENSG00000182489	5.57086	2.4779	0.0058233	0.0264992
VAV3	ENSG00000134215	5.49557	2.45827	0	0
EDIL3	ENSG00000164176	5.42587	2.43985	1.55854e-07	4.0408e-06
SPDEF	ENSG00000124664	5.40844	2.43521	9.53665e-05	0.00086978
FAM151B	ENSG00000152380	5.28166	2.40099	0.00376415	0.0184562
SCHIP1	ENSG00000151967	5.25355	2.39329	0.000438038	0.00309516
ZNF320	ENSG00000182986	5.16948	2.37002	1.88932e-05	0.000224455
CNTNAP2	ENSG00000174469	4.99421	2.32026	1.14279e-05	0.000146439
GNG2	ENSG00000186469	4.95334	2.3084	9.64784e-14	1.87003e-11
MAF	ENSG00000178573	4.70159	2.23315	9.1227e-12	1.01697e-09
SLC38A4	ENSG00000139209	4.6129	2.20567	0.00204681	0.01116
ZCWPW2	ENSG00000206559	4.60003	2.20164	0.00980565	0.0410883
SESN3	ENSG00000149212	4.56275	2.1899	0	0
ZNF117	ENSG00000152926	4.55493	2.18743	0.000950665	0.00587915
PADI3	ENSG00000142619	4.50965	2.17302	3.33067e-16	1.19432e-13
MNS1	ENSG00000138587	4.48564	2.16531	3.95689e-06	6.03777e-05
WNT6	ENSG00000115596	4.45014	2.15385	0.00381325	0.0186587
CCNI2	ENSG00000205089	4.41086	2.14106	0.00303858	0.0154369
SLC15A2	ENSG00000163406	4.33231	2.11514	0.00889864	0.0378069
TENT5C	ENSG00000183508	4.23727	2.08313	1.23235e-14	2.88195e-12
TP73	ENSG00000078900	4.23437	2.08215	6.0586e-09	2.56092e-07
C5AR1	ENSG00000197405	4.19917	2.0701	0.00143395	0.00823586
STK32A	ENSG00000169302	4.15738	2.05567	6.15171e-09	2.59518e-07
RETREG1	ENSG00000154153	4.155	2.05485	7.00223e-10	4.10898e-08
CAMK2B	ENSG00000058404	4.15053	2.0533	0	0
SOX6	ENSG00000110693	4.14757	2.05227	2.34082e-05	0.000269031
TP53INP1	ENSG00000164938	4.06281	2.02248	0	0
KLHL4	ENSG00000102271	4.0386	2.01386	5.29576e-14	1.04531e-11
CEL	ENSG00000170835	3.96017	1.98556	2.53251e-08	8.64873e-07
CST6	ENSG00000175315	3.94982	1.98179	1.17861e-07	3.19368e-06
STON1	ENSG00000243244	3.94946	1.98165	1.87123e-07	4.67211e-06
AL157392.5	ENSG00000282246	3.94081	1.97849	0.00360218	0.017804
RAB30	ENSG00000137502	3.89571	1.96189	5.52947e-12	6.53662e-10
CYP1B1	ENSG00000138061	3.85081	1.94516	1.08979e-12	1.69905e-10
HPGD	ENSG00000164120	3.84148	1.94166	9.82511e-05	0.000891553
MAP2	ENSG00000078018	3.83222	1.93818	4.90601e-08	1.52533e-06
TNFSF10	ENSG00000121858	3.83027	1.93745	0.000303543	0.00227778
GHR	ENSG00000112964	3.78887	1.92177	0.000154065	0.00129836
RNF150	ENSG00000170153	3.78313	1.91958	0	0
TFPI	ENSG00000003436	3.76708	1.91345	6.72789e-05	0.000646785
TRPV4	ENSG00000111199	3.76554	1.91286	7.90536e-06	0.000108127
UGT1A7	ENSG00000244122	3.68005	1.87972	0.00157442	0.00895181
EPHA7	ENSG00000135333	3.64961	1.86774	2.55351e-15	7.32518e-13
WDR72	ENSG00000166415	3.6428	1.86505	0.00593147	0.0269174
CLGN	ENSG00000153132	3.63927	1.86365	0.00036342	0.00264781
SLC2A5	ENSG00000142583	3.63762	1.86299	0.00459694	0.0218329
PLSCR4	ENSG00000114698	3.61564	1.85425	6.8094e-05	0.000652
TGFB2	ENSG00000092969	3.59661	1.84664	4.23576e-07	9.33733e-06
AC007192.1	ENSG00000268173	3.52127	1.81609	0.00159	0.00901655
WNT5B	ENSG00000111186	3.49386	1.80482	0.000467924	0.00327509
ALDH3A1	ENSG00000108602	3.49207	1.80408	7.45959e-13	1.18884e-10
UGT1A1	ENSG00000241635	3.46058	1.79101	0.00104074	0.00635221
UGT1A3	ENSG00000243135	3.43184	1.77898	0.0122732	0.0494122
CYP39A1	ENSG00000146233	3.38128	1.75757	8.40572e-06	0.000113492
TPPP3	ENSG00000159713	3.36713	1.75152	0.000794922	0.00505171
CFH	ENSG00000000971	3.35424	1.74599	0.00052396	0.00359356
C1QTNF5	ENSG00000223953	3.3438	1.74149	2.70566e-05	0.000303505
P2RX7	ENSG00000089041	3.3338	1.73717	5.29505e-05	0.0005284
ARHGAP28	ENSG00000088756	3.33377	1.73716	0.000140255	0.00119983
CCDC169	ENSG00000242715	3.32221	1.73214	0.000557969	0.00378204
SLC2A12	ENSG00000146411	3.32167	1.73191	0.000109801	0.000976995
ATP8A1	ENSG00000124406	3.27808	1.71285	0.00163076	0.00921612
ST8SIA6	ENSG00000148488	3.26523	1.70718	0.0108896	0.0447289
BMP7	ENSG00000101144	3.25631	1.70324	3.51473e-05	0.000375283
PLXDC2	ENSG00000120594	3.25518	1.70274	1.02341e-08	3.94687e-07
ZNF680	ENSG00000173041	3.23061	1.69181	5.08937e-12	6.04961e-10
ZNF540	ENSG00000171817	3.22792	1.69061	0.00547239	0.0251793
KLHDC1	ENSG00000197776	3.21958	1.68687	0.00303781	0.0154366
ZNF658	ENSG00000274349	3.20948	1.68234	1.76448e-12	2.56505e-10
C21orf91	ENSG00000154642	3.20708	1.68126	2.22045e-16	8.23671e-14
RNF128	ENSG00000133135	3.20552	1.68056	3.48257e-06	5.41775e-05
FO681492.1	ENSG00000277758	3.19136	1.67417	0.00740412	0.0324241
KCTD16	ENSG00000183775	3.18873	1.67298	0.000900283	0.00562089
AL355312.6	ENSG00000285991	3.16119	1.66047	0.00485299	0.0227874
C15orf65	ENSG00000261652	3.13455	1.64826	0.00209408	0.011383
CADM2	ENSG00000175161	3.13207	1.64711	0.00120394	0.0071456
TFCP2L1	ENSG00000115112	3.13156	1.64688	0	0
CSRNP3	ENSG00000178662	3.12436	1.64356	0.00263463	0.013715
RASSF9	ENSG00000198774	3.09967	1.63211	1.27538e-09	6.77524e-08
FRK	ENSG00000111816	3.09648	1.63063	3.88578e-15	1.04503e-12
SLCO2A1	ENSG00000174640	3.09036	1.62777	0.000495905	0.00343371
CEP112	ENSG00000154240	3.08892	1.6271	0.000635355	0.00419315
FAM47E	ENSG00000189157	3.08542	1.62547	0.0013938	0.0080547
ZNF273	ENSG00000198039	3.07758	1.6218	9.80443e-07	1.86867e-05
RBBP8NL	ENSG00000130701	3.06301	1.61495	0.00625618	0.0281064
KIAA0825	ENSG00000185261	3.03998	1.60406	2.11224e-07	5.17596e-06
ZNF546	ENSG00000187187	3.02587	1.59735	3.22247e-05	0.00035156
DNAJB4	ENSG00000162616	3.02388	1.5964	6.66134e-16	2.31159e-13
BMT2	ENSG00000164603	3.00777	1.58869	4.37289e-09	1.94386e-07
UGT1A6	ENSG00000167165	2.99696	1.5835	9.99201e-16	3.16144e-13
KRCC1	ENSG00000172086	2.96946	1.5702	7.37813e-10	4.25577e-08
MACROD2	ENSG00000172264	2.96332	1.56721	0.000378354	0.00273623
WNT4	ENSG00000162552	2.96127	1.56621	0.000230412	0.00181254
USP2	ENSG00000036672	2.96021	1.5657	4.48909e-06	6.74932e-05
KRT19	ENSG00000171345	2.95835	1.56479	0	0
ZNF608	ENSG00000168916	2.95564	1.56347	0	0
VIPR1	ENSG00000114812	2.95306	1.56221	0.0118729	0.0480618
NEBL	ENSG00000078114	2.94312	1.55735	0	0
CXADR	ENSG00000154639	2.92445	1.54817	1.11022e-16	4.42342e-14
ADAM22	ENSG00000008277	2.90047	1.53629	0.00030212	0.00226959
CXXC5	ENSG00000171604	2.87747	1.5248	1.84262e-06	3.19452e-05
RRM2B	ENSG00000048392	2.86913	1.52061	0	0
RIMBP3	ENSG00000275793	2.86852	1.5203	8.34725e-06	0.000113021
LMBRD2	ENSG00000164187	2.86598	1.51903	9.99201e-16	3.16144e-13
ZNF439	ENSG00000171291	2.85113	1.51153	0.00215346	0.0116323
TRIM2	ENSG00000109654	2.83548	1.50359	4.68514e-14	9.42064e-12
SERPINB13	ENSG00000197641	2.82612	1.49883	0.000222072	0.0017611
OLFML2A	ENSG00000185585	2.82227	1.49686	2.37366e-13	4.25577e-11
CCDC102B	ENSG00000150636	2.81628	1.49379	0.000341166	0.0025129
MXRA5	ENSG00000101825	2.80963	1.49038	2.32936e-12	3.2333e-10
ACADSB	ENSG00000196177	2.80636	1.4887	4.85907e-06	7.2348e-05
LCA5	ENSG00000135338	2.80426	1.48762	9.13034e-08	2.58813e-06
PSAPL1	ENSG00000178597	2.80108	1.48598	0.00120054	0.00712863
TMEM56	ENSG00000152078	2.79578	1.48325	3.09012e-07	7.16422e-06
PPM1E	ENSG00000175175	2.79545	1.48308	1.63543e-05	0.000199017
ANOS1	ENSG00000011201	2.79402	1.48234	0.000810058	0.00513355
IGIP	ENSG00000182700	2.79163	1.48111	3.03535e-08	1.00625e-06
RORA	ENSG00000069667	2.787	1.47871	2.16156e-06	3.63897e-05
TMEM106B	ENSG00000106460	2.77649	1.47326	3.72369e-13	6.45507e-11
BMF	ENSG00000104081	2.77237	1.47112	7.05036e-06	9.82439e-05
PROS1	ENSG00000184500	2.76473	1.46714	8.08657e-10	4.6272e-08
ZFP14	ENSG00000142065	2.75747	1.46334	1.35464e-05	0.000168664
TLR3	ENSG00000164342	2.74497	1.45679	0.00194062	0.0106865
SYTL2	ENSG00000137501	2.74377	1.45616	1.74714e-05	0.00021027
ZBTB41	ENSG00000177888	2.74144	1.45493	1.55564e-09	7.91245e-08
CCDC121	ENSG00000176714	2.73851	1.45339	0.0017453	0.00976848
DNAJB14	ENSG00000164031	2.71817	1.44264	9.86555e-12	1.06662e-09
PRKACB	ENSG00000142875	2.71679	1.4419	1.60008e-06	2.84981e-05
ZNF763	ENSG00000197054	2.70375	1.43496	0.00142944	0.00822092
EPHB6	ENSG00000106123	2.69907	1.43246	0.00892724	0.037906
ZNF487	ENSG00000243660	2.69084	1.42806	0.00039183	0.00281571
NWD1	ENSG00000188039	2.6894	1.42728	2.07219e-08	7.21411e-07
ALDH1L1	ENSG00000144908	2.68793	1.42649	5.29473e-05	0.0005284
GASK1B	ENSG00000164125	2.68241	1.42353	5.22078e-06	7.66839e-05
ZNF25	ENSG00000175395	2.67956	1.422	9.80584e-07	1.86867e-05
LEPR	ENSG00000116678	2.67636	1.42027	4.87477e-12	5.89217e-10
LOX	ENSG00000113083	2.67612	1.42014	3.55271e-15	9.79957e-13
KBTBD3	ENSG00000182359	2.65537	1.40891	3.99846e-06	6.09255e-05
ARL5B	ENSG00000165997	2.65268	1.40745	6.03739e-13	9.89116e-11
BGN	ENSG00000182492	2.65019	1.40609	8.95208e-10	5.01573e-08
TMTC3	ENSG00000139324	2.64992	1.40595	1.99507e-13	3.63762e-11
SERPINF1	ENSG00000132386	2.64388	1.40266	7.03279e-05	0.000668332
DMRTA1	ENSG00000176399	2.63586	1.39827	4.80017e-06	7.157e-05
LIFR	ENSG00000113594	2.62758	1.39374	4.18342e-07	9.24089e-06
TG	ENSG00000042832	2.62734	1.3936	0.00911108	0.0385924
ZNF214	ENSG00000149050	2.62488	1.39225	2.43541e-05	0.000277678
BTBD8	ENSG00000189195	2.61128	1.38475	1.09228e-07	3.00901e-06
PUS10	ENSG00000162927	2.61114	1.38468	1.45844e-11	1.47317e-09
TCP11L2	ENSG00000166046	2.60805	1.38297	6.06822e-10	3.64686e-08
MPP7	ENSG00000150054	2.60294	1.38014	3.88578e-15	1.04503e-12
LPAR6	ENSG00000139679	2.59979	1.3784	5.59033e-08	1.70363e-06
IFITM10	ENSG00000244242	2.59964	1.37831	0.012305	0.0494792
SLC2A10	ENSG00000197496	2.5966	1.37662	0.000231766	0.00182187
CYS1	ENSG00000205795	2.59544	1.37598	0.0047951	0.0225896
LCA5L	ENSG00000157578	2.59207	1.37411	0.00745028	0.0325864
CDKL2	ENSG00000138769	2.59126	1.37365	0.0112452	0.0459175
ELMOD2	ENSG00000179387	2.58753	1.37158	1.54654e-13	2.91876e-11
IFT74	ENSG00000096872	2.58347	1.36931	8.10163e-08	2.34038e-06
ZNF709	ENSG00000242852	2.5822	1.3686	0.000418767	0.00298337
ZNF107	ENSG00000196247	2.57849	1.36653	5.89339e-06	8.48136e-05
CD109	ENSG00000156535	2.55784	1.35492	0	0
GAS1	ENSG00000180447	2.55714	1.35453	1.98403e-05	0.000233643
GLT8D2	ENSG00000120820	2.55701	1.35446	0.000456217	0.00320559
WNT3A	ENSG00000154342	2.54567	1.34805	0.000183747	0.00150259
FAM171B	ENSG00000144369	2.53793	1.34365	0.00101241	0.00620215
FAT4	ENSG00000196159	2.53496	1.34196	2.29573e-09	1.10995e-07
FAXDC2	ENSG00000170271	2.53296	1.34082	0.000127511	0.00110979
PIK3R3	ENSG00000117461	2.53274	1.3407	4.21885e-15	1.1206e-12
RBP1	ENSG00000114115	2.53271	1.34068	0.0108405	0.0445867
SLC27A2	ENSG00000140284	2.53262	1.34063	0.000171691	0.00141706
ZC2HC1A	ENSG00000104427	2.52587	1.33678	1.52826e-06	2.74234e-05
ENPP5	ENSG00000112796	2.52523	1.33641	0.000972039	0.00598895
DNAJC28	ENSG00000177692	2.52461	1.33606	0.0117608	0.0476611
AMOT	ENSG00000126016	2.52079	1.33388	0.00371594	0.0182755
LYSMD3	ENSG00000176018	2.51816	1.33237	2.33147e-14	5.17129e-12
SPOCK1	ENSG00000152377	2.50966	1.32749	1.27528e-10	9.86308e-09
DPY19L4	ENSG00000156162	2.50228	1.32324	1.60982e-14	3.67097e-12
ZNF92	ENSG00000146757	2.50204	1.3231	0.000248136	0.00192243
PLCB1	ENSG00000182621	2.50125	1.32265	5.75639e-09	2.45245e-07
PGAP1	ENSG00000197121	2.49936	1.32156	1.60316e-13	2.99931e-11
PDK4	ENSG00000004799	2.49791	1.32072	4.4005e-07	9.67075e-06
POLI	ENSG00000101751	2.4962	1.31974	1.72287e-09	8.64022e-08
SLC2A13	ENSG00000151229	2.49603	1.31964	0.00229892	0.0122977
IFIT2	ENSG00000119922	2.49528	1.3192	1.8271e-10	1.33254e-08
PRRG4	ENSG00000135378	2.48421	1.31279	2.75857e-12	3.73275e-10
ZNF138	ENSG00000197008	2.48409	1.31272	0.000486259	0.00337262
SDK2	ENSG00000069188	2.48297	1.31207	8.53647e-06	0.000115004
TREX2	ENSG00000183479	2.47752	1.3089	0.00214482	0.0115915
PDE4D	ENSG00000113448	2.47344	1.30652	3.62853e-08	1.17927e-06
FBXO32	ENSG00000156804	2.47185	1.30559	0.00031172	0.00232627
TRIQK	ENSG00000205133	2.46089	1.29918	2.00922e-08	7.00623e-07
SCNN1G	ENSG00000166828	2.45859	1.29783	1.93761e-06	3.33235e-05
DAAM1	ENSG00000100592	2.45817	1.29758	0	0
FAM161A	ENSG00000170264	2.45449	1.29542	6.41064e-09	2.67815e-07
PIK3R1	ENSG00000145675	2.45255	1.29428	1.22125e-15	3.75358e-13
TTC33	ENSG00000113638	2.4479	1.29155	1.37023e-11	1.39524e-09
SENP7	ENSG00000138468	2.44234	1.28826	1.81028e-07	4.54471e-06
PRKG2	ENSG00000138669	2.44011	1.28695	0.000574512	0.00387602
IFT80	ENSG00000068885	2.43372	1.28316	3.98715e-10	2.56837e-08
GLCCI1	ENSG00000106415	2.42955	1.28069	2.34196e-07	5.62357e-06
CADM1	ENSG00000182985	2.42925	1.28051	0.0019614	0.0107845
IL6ST	ENSG00000134352	2.42598	1.27857	4.25449e-12	5.35294e-10
TSC22D3	ENSG00000157514	2.42272	1.27663	1.21704e-11	1.25887e-09
ZBTB16	ENSG00000109906	2.42262	1.27657	1.5781e-07	4.07597e-06
LGR6	ENSG00000133067	2.4178	1.27369	0.00298965	0.0152386
ITGB3BP	ENSG00000142856	2.41715	1.2733	9.68325e-12	1.06293e-09
ZNF713	ENSG00000178665	2.41666	1.27301	0.00650535	0.0290499
CPAMD8	ENSG00000160111	2.41586	1.27254	0.00723814	0.0318138
MEIOC	ENSG00000180336	2.4139	1.27136	6.7256e-06	9.4576e-05
GBP6	ENSG00000183347	2.40574	1.26648	0.00801633	0.0346606
HOXD9	ENSG00000128709	2.40367	1.26524	0.000196945	0.00159477
OXR1	ENSG00000164830	2.40002	1.26305	1.44329e-14	3.33897e-12
C5	ENSG00000106804	2.39885	1.26234	1.62596e-09	8.19263e-08
ZMAT3	ENSG00000172667	2.3942	1.25954	2.20934e-14	4.95146e-12
MAML2	ENSG00000184384	2.39242	1.25847	2.86615e-06	4.59502e-05
PPM1L	ENSG00000163590	2.39057	1.25735	0.000718089	0.00464233
G2E3	ENSG00000092140	2.38817	1.2559	2.14378e-09	1.04588e-07
COMMD8	ENSG00000169019	2.38487	1.25391	1.70108e-08	6.07953e-07
PDE5A	ENSG00000138735	2.3842	1.2535	6.60557e-10	3.92593e-08
SPATA17	ENSG00000162814	2.38417	1.25349	0.00592658	0.0269009
MANEA	ENSG00000172469	2.38048	1.25125	2.95178e-08	9.8157e-07
ZFP37	ENSG00000136866	2.37909	1.25041	6.87525e-08	2.03468e-06
PLAG1	ENSG00000181690	2.37891	1.2503	0.000275951	0.00210521
ZNF148	ENSG00000163848	2.37876	1.25021	2.94609e-11	2.78005e-09
FAM214A	ENSG00000047346	2.37542	1.24818	3.00265e-11	2.80879e-09
TMEM123	ENSG00000152558	2.3724	1.24635	2.05769e-12	2.91258e-10
CEP70	ENSG00000114107	2.37202	1.24611	6.98634e-09	2.87952e-07
EFCAB7	ENSG00000203965	2.3669	1.243	3.29536e-06	5.17894e-05
MLLT3	ENSG00000171843	2.3667	1.24288	1.07013e-10	8.46466e-09
LCORL	ENSG00000178177	2.36606	1.24249	4.62155e-08	1.44945e-06
ZBTB10	ENSG00000205189	2.36181	1.23989	4.06342e-14	8.32613e-12
ARHGAP5	ENSG00000100852	2.36021	1.23892	2.9472e-12	3.96306e-10
EAF2	ENSG00000145088	2.36009	1.23884	0.00200825	0.0109943
DZIP3	ENSG00000198919	2.35833	1.23776	5.85806e-08	1.77766e-06
SMIM14	ENSG00000163683	2.3571	1.23701	3.4066e-11	3.13218e-09
ZNF20	ENSG00000132010	2.3446	1.22934	0.00576637	0.0262846
ADAMTS7	ENSG00000136378	2.33888	1.22582	6.38948e-11	5.45514e-09
MOXD1	ENSG00000079931	2.33546	1.22371	0.00258998	0.0135514
SUCO	ENSG00000094975	2.33483	1.22332	2.58664e-11	2.49559e-09
BRMS1L	ENSG00000100916	2.3346	1.22318	1.59874e-09	8.07438e-08
ZNF260	ENSG00000254004	2.33149	1.22125	1.68447e-06	2.98038e-05
ARRDC3	ENSG00000113369	2.32674	1.21831	5.32907e-15	1.3332e-12
ETAA1	ENSG00000143971	2.325	1.21723	2.1203e-06	3.58352e-05
PTEN	ENSG00000171862	2.32322	1.21613	2.66454e-15	7.44513e-13
GRAMD1C	ENSG00000178075	2.32154	1.21508	3.67665e-05	0.000390055
SNX16	ENSG00000104497	2.31865	1.21328	3.85549e-05	0.000405231
CEP44	ENSG00000164118	2.31843	1.21315	4.02312e-12	5.15029e-10
SMIM10L2A	ENSG00000178947	2.3129	1.2097	0.00478128	0.0225343
PBX1	ENSG00000185630	2.31141	1.20878	1.62121e-08	5.83283e-07
HS2ST1	ENSG00000153936	2.31135	1.20873	3.43059e-14	7.45547e-12
SEMA3C	ENSG00000075223	2.3109	1.20846	5.38236e-13	8.97686e-11
CEP126	ENSG00000110318	2.30819	1.20676	1.05499e-06	1.99631e-05
AC098850.3	ENSG00000266302	2.30774	1.20648	0.00533744	0.0246799
ETFRF1	ENSG00000205707	2.30335	1.20373	5.16305e-05	0.000517587
CACNB4	ENSG00000182389	2.30326	1.20368	1.20444e-10	9.38898e-09
GXYLT1	ENSG00000151233	2.29627	1.19929	6.64234e-09	2.75888e-07
ZNF10	ENSG00000256223	2.29399	1.19786	0.000921494	0.00572177
TPK1	ENSG00000196511	2.29298	1.19723	0.00911223	0.0385924
AC138969.1	ENSG00000183889	2.29012	1.19543	0.00462526	0.0219384
SLF1	ENSG00000133302	2.28921	1.19485	3.31028e-10	2.21133e-08
KIF27	ENSG00000165115	2.28898	1.19471	2.66398e-06	4.31593e-05
MBNL3	ENSG00000076770	2.28869	1.19452	4.49148e-07	9.82054e-06
PDIK1L	ENSG00000175087	2.28839	1.19433	1.01027e-07	2.82651e-06
C4orf33	ENSG00000151470	2.28823	1.19423	8.02904e-06	0.000109419
ANK3	ENSG00000151150	2.28559	1.19257	5.44009e-15	1.34533e-12
ZNF484	ENSG00000127081	2.28043	1.18931	2.07713e-11	2.05942e-09
LFNG	ENSG00000106003	2.28013	1.18912	2.42308e-07	5.78608e-06
UFL1	ENSG00000014123	2.27835	1.18799	2.07159e-10	1.47097e-08
ITGB8	ENSG00000105855	2.27693	1.18709	2.36033e-13	4.25577e-11
ZNF704	ENSG00000164684	2.27582	1.18639	1.87882e-08	6.63757e-07
SULF1	ENSG00000137573	2.27097	1.18331	0.00141039	0.00813574
SMPDL3A	ENSG00000172594	2.26417	1.17898	0.000313922	0.00233961
FOXN1	ENSG00000109101	2.26147	1.17726	0.00910393	0.0385801
MAFB	ENSG00000204103	2.25982	1.1762	0.00107603	0.00651951
ATP7A	ENSG00000165240	2.25864	1.17545	3.66791e-08	1.18848e-06
TRIM6	ENSG00000121236	2.2582	1.17517	1.52209e-06	2.73811e-05
CCP110	ENSG00000103540	2.25428	1.17267	1.04913e-11	1.11192e-09
ZNF714	ENSG00000160352	2.25382	1.17237	9.46114e-08	2.67134e-06
PLOD2	ENSG00000152952	2.25369	1.17229	2.10945e-11	2.07236e-09
COL5A2	ENSG00000204262	2.25179	1.17107	0.0107619	0.0443141
SLC26A2	ENSG00000155850	2.24687	1.16791	8.85003e-12	9.91711e-10
HMMR	ENSG00000072571	2.24671	1.16781	1.28595e-09	6.81456e-08
TMCC2	ENSG00000133069	2.24382	1.16596	6.42027e-06	9.12968e-05
DOCK11	ENSG00000147251	2.24017	1.16361	6.44818e-12	7.49905e-10
CETN3	ENSG00000153140	2.23869	1.16265	1.28683e-07	3.45645e-06
DENND4C	ENSG00000137145	2.23619	1.16104	4.55191e-15	1.17993e-12
VPS13C	ENSG00000129003	2.23603	1.16094	2.98863e-11	2.80788e-09
CCPG1	ENSG00000260916	2.23087	1.1576	6.3224e-09	2.65677e-07
NR1D2	ENSG00000174738	2.22989	1.15697	8.757e-12	9.86423e-10
CLEC2D	ENSG00000069493	2.22937	1.15664	0.00377308	0.0184868
NEURL1B	ENSG00000214357	2.2259	1.15439	1.68093e-07	4.26979e-06
ZGRF1	ENSG00000138658	2.22521	1.15394	1.51806e-08	5.53821e-07
CCDC144A	ENSG00000170160	2.22504	1.15383	0.00900009	0.0381791
PCMTD1	ENSG00000168300	2.21854	1.14961	1.54746e-08	5.6239e-07
CCDC82	ENSG00000149231	2.21659	1.14834	3.11917e-06	4.94175e-05
TSGA10	ENSG00000135951	2.21599	1.14795	0.0105065	0.0434791
MIPOL1	ENSG00000151338	2.21549	1.14762	6.68332e-06	9.41044e-05
ZNF136	ENSG00000196646	2.21443	1.14693	7.101e-05	0.000673625
CLK4	ENSG00000113240	2.21437	1.1469	8.78289e-07	1.71474e-05
FAM102B	ENSG00000162636	2.21308	1.14605	1.28559e-08	4.84404e-07
FKBP7	ENSG00000079150	2.21135	1.14493	0.00715493	0.0314996
ZNF678	ENSG00000181450	2.21084	1.14459	0.000511454	0.00352239
SGO2	ENSG00000163535	2.21072	1.14452	5.71571e-06	8.27547e-05
NXT2	ENSG00000101888	2.21046	1.14435	5.01951e-06	7.43766e-05
MATN2	ENSG00000132561	2.20854	1.14309	0.0041351	0.0199611
ZDHHC20	ENSG00000180776	2.20744	1.14238	1.53089e-12	2.28729e-10
TBC1D8B	ENSG00000133138	2.2065	1.14176	1.80372e-07	4.53354e-06
ARMT1	ENSG00000146476	2.20635	1.14166	2.00434e-10	1.44172e-08
SEMA6D	ENSG00000137872	2.20623	1.14158	0.00110432	0.00666463
AK9	ENSG00000155085	2.20396	1.1401	0.00955173	0.0402242
NINJ1	ENSG00000131669	2.19915	1.13694	1.33542e-09	7.00772e-08
ARAP2	ENSG00000047365	2.19876	1.13669	1.26654e-12	1.91899e-10
CARF	ENSG00000138380	2.19824	1.13635	1.32862e-06	2.43279e-05
MEGF9	ENSG00000106780	2.1973	1.13573	3.71925e-14	7.92273e-12
UTRN	ENSG00000152818	2.19558	1.1346	5.09592e-14	1.01517e-11
GPR155	ENSG00000163328	2.19377	1.13341	0.000454292	0.00319519
FAM49A	ENSG00000197872	2.19348	1.13322	0.0113851	0.0464011
CYP4X1	ENSG00000186377	2.19312	1.13298	0.00712214	0.0313745
ATRX	ENSG00000085224	2.19301	1.13291	6.06944e-08	1.82891e-06
ZNF606	ENSG00000166704	2.19168	1.13204	3.26965e-05	0.000354926
ZNF644	ENSG00000122482	2.19006	1.13097	1.81576e-08	6.43594e-07
CDK1	ENSG00000170312	2.18941	1.13054	4.69819e-11	4.12577e-09
TMEM65	ENSG00000164983	2.18888	1.13019	8.03801e-13	1.26232e-10
ZNF440	ENSG00000171295	2.18873	1.13009	7.22363e-11	6.14294e-09
ETV1	ENSG00000006468	2.18869	1.13007	3.71114e-06	5.72492e-05
CDK19	ENSG00000155111	2.18846	1.12991	7.15545e-10	4.18341e-08
CERS6	ENSG00000172292	2.18655	1.12865	8.56382e-12	9.70821e-10
KCNMB4	ENSG00000135643	2.18584	1.12819	7.51684e-05	0.00070653
CAMK4	ENSG00000152495	2.18534	1.12786	0.00213634	0.0115602
SYNE1	ENSG00000131018	2.18529	1.12783	1.28075e-12	1.92695e-10
AKAP9	ENSG00000127914	2.18383	1.12686	1.45631e-06	2.63298e-05
KIAA1109	ENSG00000138688	2.18209	1.12571	2.03755e-11	2.02953e-09
ADAM32	ENSG00000197140	2.18185	1.12555	0.00205334	0.011187
ZFYVE16	ENSG00000039319	2.18043	1.12461	3.82017e-11	3.4534e-09
CPD	ENSG00000108582	2.17916	1.12377	4.32987e-15	1.13606e-12
CD302	ENSG00000241399	2.17861	1.12341	0.00095328	0.00589193
GTF2IRD2	ENSG00000196275	2.17818	1.12313	0.00888163	0.0377421
ABCA5	ENSG00000154265	2.17779	1.12286	7.69182e-06	0.000105677
KLF9	ENSG00000119138	2.17708	1.1224	0	0
CUL5	ENSG00000166266	2.17363	1.1201	1.41073e-10	1.05388e-08
TPPP	ENSG00000171368	2.17337	1.11994	3.19648e-07	7.3814e-06
SWT1	ENSG00000116668	2.17301	1.1197	0.000476979	0.00332433
TMEM178B	ENSG00000261115	2.17169	1.11882	1.43748e-05	0.000177438
ZDBF2	ENSG00000204186	2.17116	1.11847	2.84686e-08	9.54053e-07
MBNL2	ENSG00000139793	2.17097	1.11834	3.31513e-13	5.79878e-11
CHD9	ENSG00000177200	2.17075	1.11819	8.87309e-10	4.98445e-08
DUSP19	ENSG00000162999	2.17049	1.11802	0.000290824	0.00219778
XRCC4	ENSG00000152422	2.16914	1.11713	1.59655e-08	5.77626e-07
HSPA13	ENSG00000155304	2.16882	1.11691	3.79069e-11	3.44926e-09
SNX4	ENSG00000114520	2.16541	1.11464	3.24163e-08	1.06805e-06
AGL	ENSG00000162688	2.16425	1.11386	9.52001e-11	7.72917e-09
CCDC126	ENSG00000169193	2.16291	1.11297	0.000367314	0.00266985
LMAN1	ENSG00000074695	2.16208	1.11242	4.45954e-12	5.5142e-10
PLEKHF2	ENSG00000175895	2.15566	1.10813	2.43378e-11	2.35868e-09
ZNF181	ENSG00000197841	2.15347	1.10666	1.62364e-05	0.000197806
CENPF	ENSG00000117724	2.15328	1.10653	5.0899e-09	2.2034e-07
SAMD5	ENSG00000203727	2.1531	1.10642	0.0011341	0.0068045
HOOK1	ENSG00000134709	2.15131	1.10521	7.00905e-10	4.10898e-08
TUT4	ENSG00000134744	2.15101	1.10501	3.91682e-11	3.51127e-09
DCP2	ENSG00000172795	2.15059	1.10473	7.80216e-11	6.53165e-09
ITGAV	ENSG00000138448	2.14915	1.10377	4.80405e-12	5.83949e-10
MIER3	ENSG00000155545	2.14725	1.10249	8.29061e-10	4.71885e-08
SLC2A4	ENSG00000181856	2.141	1.09828	0.0105305	0.0435532
KTN1	ENSG00000126777	2.13998	1.09759	5.06718e-08	1.5685e-06
SLC39A10	ENSG00000196950	2.13838	1.09652	3.48283e-09	1.58421e-07
CUL4B	ENSG00000158290	2.13782	1.09614	8.88477e-11	7.38053e-09
ZNF654	ENSG00000175105	2.1372	1.09572	2.98808e-09	1.39758e-07
EFEMP1	ENSG00000115380	2.1363	1.09511	0	0
AEBP2	ENSG00000139154	2.13603	1.09493	1.02864e-09	5.65111e-08
ZNF184	ENSG00000096654	2.13388	1.09348	2.41592e-07	5.77539e-06
SMC2	ENSG00000136824	2.13282	1.09276	7.35067e-09	2.9939e-07
LYST	ENSG00000143669	2.13091	1.09147	5.55583e-10	3.38136e-08
TEX15	ENSG00000133863	2.13083	1.09142	0.000128819	0.00111936
ZNF280D	ENSG00000137871	2.128	1.0895	9.95728e-07	1.8925e-05
DISP1	ENSG00000154309	2.12787	1.08941	1.52734e-05	0.000187454
PELI2	ENSG00000139946	2.12784	1.08939	0.000554832	0.00376212
FAM76B	ENSG00000077458	2.12747	1.08914	4.01564e-05	0.000418588
EMB	ENSG00000170571	2.1264	1.08841	2.74222e-10	1.87894e-08
ZNF43	ENSG00000198521	2.12501	1.08747	0.0017217	0.00965649
PIGK	ENSG00000142892	2.12265	1.08586	1.07995e-11	1.13897e-09
VPS13A	ENSG00000197969	2.12251	1.08577	7.69623e-09	3.09503e-07
SLC25A27	ENSG00000153291	2.12128	1.08494	0.00665233	0.0296079
SLC16A14	ENSG00000163053	2.12048	1.08439	8.23682e-10	4.70067e-08
ICK	ENSG00000112144	2.11499	1.08065	3.69782e-10	2.43299e-08
FAM13A	ENSG00000138640	2.11438	1.08024	3.4465e-09	1.57598e-07
ZC3H6	ENSG00000188177	2.10988	1.07716	1.05345e-07	2.93209e-06
ZNF519	ENSG00000175322	2.10916	1.07667	0.00103662	0.00632887
SLITRK6	ENSG00000184564	2.10789	1.0758	2.03867e-06	3.46187e-05
ALCAM	ENSG00000170017	2.10766	1.07564	2.89504e-10	1.962e-08
MTUS1	ENSG00000129422	2.10533	1.07405	3.11006e-10	2.09103e-08
DDX60	ENSG00000137628	2.1048	1.07368	2.05581e-07	5.04917e-06
KIF20B	ENSG00000138182	2.10454	1.0735	3.78039e-05	0.000398311
MIER1	ENSG00000198160	2.10317	1.07257	6.58556e-09	2.74058e-07
EGLN3	ENSG00000129521	2.10315	1.07255	0.00167759	0.00943614
CEP162	ENSG00000135315	2.10289	1.07238	0.000618919	0.0041097
ZNF354C	ENSG00000177932	2.10263	1.0722	5.72972e-08	1.74117e-06
DEK	ENSG00000124795	2.1018	1.07163	1.55771e-08	5.65162e-07
ESCO2	ENSG00000171320	2.10146	1.07139	3.01915e-09	1.40664e-07
ESCO1	ENSG00000141446	2.09992	1.07033	1.38703e-06	2.52472e-05
FAM227A	ENSG00000184949	2.09955	1.07008	0.00641427	0.0286849
TENT5A	ENSG00000112773	2.09944	1.07	0.00123868	0.00730728
KIF18A	ENSG00000121621	2.09824	1.06918	2.04762e-07	5.04635e-06
NHLH2	ENSG00000177551	2.09781	1.06888	0.0106385	0.0439155
STAG2	ENSG00000101972	2.09763	1.06876	5.56356e-10	3.38136e-08
ALG10B	ENSG00000175548	2.09736	1.06858	1.78964e-06	3.12533e-05
PCGF5	ENSG00000180628	2.09685	1.06822	7.61846e-08	2.21801e-06
PRKAA2	ENSG00000162409	2.09573	1.06746	0.000361896	0.00263938
COL8A1	ENSG00000144810	2.09445	1.06657	0.0013967	0.00806929
CROT	ENSG00000005469	2.09247	1.0652	5.31987e-10	3.27957e-08
ADD3	ENSG00000148700	2.09217	1.065	1.76283e-08	6.26896e-07
TOP2A	ENSG00000131747	2.09153	1.06456	4.98845e-12	5.97586e-10
DCUN1D1	ENSG00000043093	2.08946	1.06313	1.05424e-06	1.99631e-05
ARL6	ENSG00000113966	2.08914	1.06291	2.42115e-06	3.97946e-05
CTDSPL2	ENSG00000137770	2.08891	1.06275	3.48805e-11	3.19343e-09
PLEKHA1	ENSG00000107679	2.08728	1.06163	9.80878e-11	7.93368e-09
ZNF112	ENSG00000062370	2.08715	1.06153	0.000161563	0.0013473
SESN1	ENSG00000080546	2.08632	1.06096	2.27101e-10	1.60199e-08
RNF152	ENSG00000176641	2.08211	1.05805	8.57336e-12	9.70821e-10
PTAR1	ENSG00000188647	2.0815	1.05762	1.39446e-08	5.14612e-07
CENPQ	ENSG00000031691	2.08137	1.05753	0.000159133	0.00133168
CCDC186	ENSG00000165813	2.08044	1.05689	1.932e-05	0.000228561
C8orf59	ENSG00000176731	2.07564	1.05355	2.43139e-14	5.33789e-12
SERTAD4	ENSG00000082497	2.07555	1.05349	8.635e-09	3.4026e-07
ZSCAN31	ENSG00000235109	2.07514	1.05321	0.0010007	0.00613741
TMX3	ENSG00000166479	2.07448	1.05275	2.83823e-10	1.93856e-08
P2RX6	ENSG00000099957	2.07413	1.05251	0.00377681	0.0184971
VSNL1	ENSG00000163032	2.07361	1.05214	0.00863407	0.0368283
GMCL1	ENSG00000087338	2.07321	1.05187	7.36124e-09	2.9939e-07
MEF2A	ENSG00000068305	2.0728	1.05158	3.96838e-12	5.11399e-10
ZNF180	ENSG00000167384	2.07157	1.05073	5.30642e-07	1.13374e-05
ASPM	ENSG00000066279	2.07051	1.04999	2.77454e-06	4.46146e-05
HOXA13	ENSG00000106031	2.06943	1.04923	0.0121145	0.0488555
ZSCAN23	ENSG00000187987	2.06931	1.04915	0.00597203	0.0270502
RGS5	ENSG00000143248	2.06918	1.04906	0.00801208	0.0346543
CCDC14	ENSG00000175455	2.06912	1.04902	1.49022e-08	5.45273e-07
CEP350	ENSG00000135837	2.06894	1.04889	2.73139e-10	1.8775e-08
CD164	ENSG00000135535	2.068	1.04824	1.87509e-11	1.8764e-09
ANK1	ENSG00000029534	2.06659	1.04725	0.00135269	0.00784662
MDFIC	ENSG00000135272	2.06538	1.0464	3.41715e-10	2.26215e-08
DEPDC1	ENSG00000024526	2.06498	1.04613	8.10402e-08	2.34038e-06
RCBTB2	ENSG00000136161	2.06131	1.04356	1.13569e-07	3.1008e-06
SPATA6	ENSG00000132122	2.06115	1.04345	0.000863352	0.00542282
FAM172A	ENSG00000113391	2.06098	1.04333	6.11332e-11	5.26112e-09
TBL1XR1	ENSG00000177565	2.06073	1.04315	2.21403e-10	1.56694e-08
WNT5A	ENSG00000114251	2.06053	1.04302	1.02962e-09	5.65111e-08
EPS8	ENSG00000151491	2.06025	1.04282	1.08299e-07	2.99108e-06
STXBP3	ENSG00000116266	2.05829	1.04144	4.02302e-07	8.94166e-06
TTC3	ENSG00000182670	2.05741	1.04083	4.99956e-12	5.97586e-10
NDUFA5	ENSG00000128609	2.05628	1.04004	7.12906e-08	2.09252e-06
ZNF254	ENSG00000213096	2.05417	1.03856	0.0003158	0.00235101
ABRAXAS1	ENSG00000163322	2.05365	1.03819	1.4399e-07	3.77797e-06
DNAH5	ENSG00000039139	2.05326	1.03792	8.03031e-06	0.000109419
EXOC6	ENSG00000138190	2.05223	1.03719	1.52429e-05	0.000187187
SYT12	ENSG00000173227	2.0516	1.03675	0.00487644	0.0228826
SASS6	ENSG00000156876	2.04721	1.03366	4.61365e-05	0.000470217
SCOC	ENSG00000153130	2.04715	1.03362	1.91696e-08	6.75016e-07
BRCA2	ENSG00000139618	2.04661	1.03324	3.12206e-05	0.000343411
CKAP2	ENSG00000136108	2.04506	1.03214	2.89992e-10	1.962e-08
REL	ENSG00000162924	2.04401	1.0314	1.64317e-08	5.89213e-07
ZNF483	ENSG00000173258	2.04381	1.03126	4.63052e-07	1.00734e-05
FZD6	ENSG00000164930	2.04325	1.03087	5.53518e-10	3.38136e-08
SOS1	ENSG00000115904	2.04321	1.03084	1.30116e-10	9.92715e-09
TMEM67	ENSG00000164953	2.04209	1.03005	1.72441e-06	3.03358e-05
COPS2	ENSG00000166200	2.04158	1.02969	2.88549e-08	9.62502e-07
MIB1	ENSG00000101752	2.04137	1.02954	6.56946e-10	3.91529e-08
ZNF253	ENSG00000256771	2.04131	1.0295	0.00116598	0.00696252
TMED7	ENSG00000134970	2.04054	1.02895	1.2367e-10	9.60566e-09
GIN1	ENSG00000145723	2.03934	1.02811	3.91815e-05	0.000410414
CRYBG3	ENSG00000080200	2.03913	1.02795	1.55025e-07	4.03309e-06
GAB1	ENSG00000109458	2.03696	1.02642	1.48381e-09	7.61911e-08
SPAST	ENSG00000021574	2.03695	1.02641	8.83452e-10	4.97578e-08
TIA1	ENSG00000116001	2.03665	1.0262	1.78377e-09	8.86126e-08
SLC25A40	ENSG00000075303	2.03639	1.02601	2.5861e-08	8.80379e-07
ATXN3	ENSG00000066427	2.03622	1.02589	7.19178e-10	4.18426e-08
SCAMP1	ENSG00000085365	2.03603	1.02576	3.31983e-10	2.21133e-08
COBLL1	ENSG00000082438	2.03548	1.02537	6.96677e-08	2.05483e-06
HSPA4L	ENSG00000164070	2.03495	1.02499	4.12479e-11	3.68236e-09
ARL5A	ENSG00000162980	2.0336	1.02403	3.61733e-09	1.64192e-07
IL6R	ENSG00000160712	2.03065	1.02194	1.09206e-09	5.93323e-08
TMEM30A	ENSG00000112697	2.02835	1.0203	8.36268e-10	4.74731e-08
ITGB6	ENSG00000115221	2.02655	1.01903	3.92299e-09	1.76946e-07
UBL3	ENSG00000122042	2.02623	1.0188	1.32228e-08	4.95623e-07
SH3BGRL	ENSG00000131171	2.02554	1.0183	0.000200841	0.00162142
PLCE1	ENSG00000138193	2.02499	1.01791	1.08691e-13	2.08793e-11
CNTLN	ENSG00000044459	2.02354	1.01688	1.30756e-06	2.40035e-05
ZMYM2	ENSG00000121741	2.02188	1.01569	3.76577e-12	4.95469e-10
ZNF292	ENSG00000188994	2.02036	1.01461	1.039e-07	2.89937e-06
OSBPL8	ENSG00000091039	2.02026	1.01454	2.12071e-07	5.18772e-06
GLCE	ENSG00000138604	2.01964	1.0141	5.15511e-09	2.21824e-07
ZNF780A	ENSG00000197782	2.01938	1.01391	0.000130734	0.00113413
NUCB2	ENSG00000070081	2.01781	1.01279	7.80445e-06	0.000106951
SLC1A1	ENSG00000106688	2.01745	1.01253	0.00484417	0.022751
PPP2R3A	ENSG00000073711	2.0172	1.01235	1.11826e-07	3.06099e-06
PFDN4	ENSG00000101132	2.01686	1.01211	1.88794e-05	0.000224414
ATM	ENSG00000149311	2.0168	1.01207	2.54721e-10	1.76216e-08
IFIT3	ENSG00000119917	2.01664	1.01195	0.00028146	0.00213678
SMC5	ENSG00000198887	2.0146	1.0105	1.15309e-05	0.000147496
AKAP6	ENSG00000151320	2.01422	1.01022	3.47362e-05	0.000372186
APPL1	ENSG00000157500	2.01369	1.00984	2.25451e-08	7.77335e-07
UBR3	ENSG00000144357	2.01328	1.00955	1.04126e-11	1.10904e-09
SLC44A5	ENSG00000137968	2.01317	1.00947	0.0014826	0.00848808
HLTF	ENSG00000071794	2.01279	1.0092	1.45606e-09	7.5487e-08
RCOR3	ENSG00000117625	2.01176	1.00846	1.15011e-10	9.06398e-09
ZNF518A	ENSG00000177853	2.01159	1.00834	6.27313e-07	1.30655e-05
SSX2IP	ENSG00000117155	2.01073	1.00772	1.88227e-08	6.63885e-07
DCUN1D4	ENSG00000109184	2.00955	1.00688	6.97998e-10	4.10898e-08
LAMP2	ENSG00000005893	2.00863	1.00621	1.1835e-12	1.83187e-10
FGD4	ENSG00000139132	2.00834	1.006	1.83861e-10	1.33641e-08
POLK	ENSG00000122008	2.00692	1.00498	1.27604e-07	3.43175e-06
SYCP2	ENSG00000196074	2.00655	1.00472	0.00180291	0.0100361
LIN9	ENSG00000183814	2.00646	1.00465	2.1494e-06	3.62417e-05
TTK	ENSG00000112742	2.00582	1.00419	1.76002e-09	8.78583e-08
ZNF100	ENSG00000197020	2.00435	1.00314	0.000294478	0.00222227
CREBRF	ENSG00000164463	2.00252	1.00181	1.72278e-06	3.03319e-05
ELAVL2	ENSG00000107105	2.00234	1.00169	2.6244e-09	1.23824e-07
CEP290	ENSG00000198707	2.00228	1.00164	0.00287005	0.0147452
CAVIN2	ENSG00000168497	2.00142	1.00103	2.57609e-09	1.2235e-07
INPP5D	ENSG00000168918	2.00133	1.00096	2.84869e-09	1.33529e-07
TMX1	ENSG00000139921	2.00044	1.00032	2.7616e-09	1.30013e-07

## Sheet: DN (stiff vs native)
Supplementary data 4. DEGs in Endo180-KO-acini in stiff-BM versus native-BM
Gene Name	Ensembl Identifier	Fold change (FC ≤ - 2)	Log fold change	p value (p < 0.05)	FDR p value (p < 0.05)
PI3	ENSG00000124102	-10.1479	-3.34311	0	0
KRT6B	ENSG00000185479	-6.05988	-2.59929	0	0
KRT6C	ENSG00000170465	-5.31002	-2.40872	0	0
NIPAL4	ENSG00000172548	-4.50068	-2.17014	0	0
OSBP2	ENSG00000184792	-4.38637	-2.13303	0	0
NAV3	ENSG00000067798	-4.27575	-2.09618	0	0
S100P	ENSG00000163993	-4.26169	-2.09143	0	0
TNFAIP3	ENSG00000118503	-3.90514	-1.96538	0	0
IL1B	ENSG00000125538	-3.83763	-1.94021	0	0
DUSP4	ENSG00000120875	-3.77674	-1.91714	0	0
FZD8	ENSG00000177283	-3.69503	-1.88559	0	0
PRSS3	ENSG00000010438	-3.6415	-1.86453	0	0
SLPI	ENSG00000124107	-3.45123	-1.78711	0	0
IL1A	ENSG00000115008	-3.25251	-1.70155	0	0
DUSP5	ENSG00000138166	-3.20339	-1.6796	0	0
MAFF	ENSG00000185022	-3.09226	-1.62866	0	0
PTGES	ENSG00000148344	-3.07126	-1.61883	0	0
ID1	ENSG00000125968	-3.0158	-1.59254	0	0
ZBED2	ENSG00000177494	-2.9967	-1.58337	0	0
UPP1	ENSG00000183696	-2.99268	-1.58144	0	0
SLCO4A1	ENSG00000101187	-2.95078	-1.5611	0	0
HBEGF	ENSG00000113070	-2.79292	-1.48178	0	0
ODC1	ENSG00000115758	-2.7683	-1.469	0	0
ADAM8	ENSG00000151651	-2.71203	-1.43937	0	0
KRT6A	ENSG00000205420	-2.67029	-1.417	0	0
CCDC86	ENSG00000110104	-2.61494	-1.38678	0	0
SPRY4	ENSG00000187678	-2.57693	-1.36566	0	0
GJB3	ENSG00000188910	-2.39019	-1.25712	0	0
BCL2L1	ENSG00000171552	-2.37222	-1.24624	0	0
GPRC5A	ENSG00000013588	-2.25039	-1.17017	0	0
AEN	ENSG00000181026	-2.20666	-1.14186	0	0
YRDC	ENSG00000196449	-2.13662	-1.09533	0	0
TGFA	ENSG00000163235	-2.6432	-1.40228	1.11022e-16	4.42342e-14
TTLL11	ENSG00000175764	-2.34718	-1.23093	2.22045e-16	8.23671e-14
EHD1	ENSG00000110047	-2.33944	-1.22616	2.22045e-16	8.23671e-14
XDH	ENSG00000158125	-2.42376	-1.27724	3.33067e-16	1.19432e-13
SERPINB8	ENSG00000166401	-2.27532	-1.18607	8.88178e-16	2.89533e-13
ATAD3B	ENSG00000160072	-2.50726	-1.32611	1.11022e-15	3.4618e-13
FAM83A	ENSG00000147689	-2.23624	-1.16107	1.66533e-15	4.90817e-13
N4BP3	ENSG00000145911	-2.36479	-1.24171	1.77636e-15	5.16464e-13
SH2D2A	ENSG00000027869	-3.74743	-1.9059	4.996e-15	1.26458e-12
SMTN	ENSG00000183963	-2.49425	-1.31861	6.43929e-15	1.57433e-12
EPHA2	ENSG00000142627	-2.3217	-1.21518	1.06581e-14	2.54789e-12
CITED4	ENSG00000179862	-3.05201	-1.60976	1.09912e-14	2.59864e-12
SOCS3	ENSG00000184557	-2.42781	-1.27965	3.4972e-14	7.52423e-12
PTHLH	ENSG00000087494	-4.07244	-2.02589	5.78426e-14	1.13135e-11
PLXNA2	ENSG00000076356	-2.03761	-1.02687	1.27232e-13	2.42247e-11
JUN	ENSG00000177606	-2.42849	-1.28006	2.64233e-13	4.69833e-11
TMEM265	ENSG00000281991	-2.82003	-1.49571	3.75033e-13	6.45507e-11
SPRR1B	ENSG00000169469	-6.38463	-2.6746	3.92464e-13	6.70148e-11
BCAR3	ENSG00000137936	-2.15774	-1.10952	5.67324e-13	9.38921e-11
FOSL1	ENSG00000175592	-3.86939	-1.95211	6.15508e-13	9.95031e-11
HES5	ENSG00000197921	-6.58352	-2.71886	1.22202e-12	1.86467e-10
HS3ST1	ENSG00000002587	-2.43309	-1.28279	1.56575e-12	2.30733e-10
HAS3	ENSG00000103044	-2.00253	-1.00183	1.55809e-12	2.30733e-10
CXCL8	ENSG00000169429	-8.90976	-3.15539	1.75149e-12	2.56349e-10
RELB	ENSG00000104856	-2.16177	-1.11221	2.39597e-12	3.30445e-10
GAL	ENSG00000069482	-3.18783	-1.67258	2.5554e-12	3.50188e-10
ADRB2	ENSG00000169252	-2.11037	-1.07749	3.39218e-12	4.53308e-10
TWNK	ENSG00000107815	-2.17907	-1.12372	3.96949e-12	5.11399e-10
RAPGEF3	ENSG00000079337	-3.84767	-1.94398	4.33165e-12	5.38702e-10
IRAK2	ENSG00000134070	-2.18597	-1.12827	8.22187e-12	9.45954e-10
RRP9	ENSG00000114767	-2.2126	-1.14574	9.37739e-12	1.03464e-09
SERPINB2	ENSG00000197632	-5.67196	-2.50385	1.16661e-11	1.21254e-09
S100A8	ENSG00000143546	-4.78106	-2.25733	1.30305e-11	1.34139e-09
FOXD1	ENSG00000251493	-2.07691	-1.05444	1.31501e-11	1.34726e-09
MICAL2	ENSG00000133816	-2.52195	-1.33454	2.08696e-11	2.05968e-09
LENG9	ENSG00000275183	-2.19555	-1.13458	2.79926e-11	2.67672e-09
PPP2R2C	ENSG00000074211	-3.06794	-1.61727	2.84994e-11	2.71312e-09
PHLDA1	ENSG00000139289	-2.37715	-1.24923	9.95944e-11	8.02537e-09
BMP6	ENSG00000153162	-3.94651	-1.98058	1.02678e-10	8.21229e-09
NOP16	ENSG00000048162	-2.12711	-1.0889	1.2838e-10	9.86308e-09
SMOX	ENSG00000088826	-2.16882	-1.11691	1.42911e-10	1.06025e-08
SH2D3A	ENSG00000125731	-2.0795	-1.05623	1.68059e-10	1.23406e-08
ARG2	ENSG00000081181	-2.37362	-1.24709	1.76339e-10	1.29045e-08
NOL6	ENSG00000165271	-2.05374	-1.03825	2.34263e-10	1.64175e-08
SH2D5	ENSG00000189410	-2.42462	-1.27776	2.86069e-10	1.94771e-08
AQP3	ENSG00000165272	-2.72681	-1.44721	3.00158e-10	2.02442e-08
SPHK1	ENSG00000176170	-2.13862	-1.09668	3.40154e-10	2.25877e-08
DDN	ENSG00000181418	-3.40828	-1.76904	3.75309e-10	2.46182e-08
KLK10	ENSG00000129451	-5.75893	-2.5258	4.97692e-10	3.10372e-08
FJX1	ENSG00000179431	-2.01856	-1.01333	6.74742e-10	3.99919e-08
UNC13D	ENSG00000092929	-2.44969	-1.2926	1.23951e-09	6.61739e-08
ECM1	ENSG00000143369	-2.05294	-1.03769	1.26335e-09	6.72794e-08
KBTBD11	ENSG00000176595	-2.71316	-1.43997	1.44506e-09	7.52797e-08
CCDC85B	ENSG00000175602	-2.01572	-1.0113	1.46911e-09	7.57984e-08
SPRR2D	ENSG00000163216	-6.0693	-2.60153	1.56723e-09	7.93389e-08
EEF1AKMT4	ENSG00000284753	-2.17089	-1.11829	1.78002e-09	8.86126e-08
CDC42EP2	ENSG00000149798	-4.21594	-2.07585	2.05619e-09	1.01002e-07
ETS1	ENSG00000134954	-2.15069	-1.1048	2.18017e-09	1.06123e-07
FAM20C	ENSG00000177706	-2.02609	-1.0187	4.77933e-09	2.09852e-07
DLC1	ENSG00000164741	-2.31372	-1.21021	7.60271e-09	3.0638e-07
CTXN1	ENSG00000178531	-2.45204	-1.29398	9.3664e-09	3.67064e-07
VGF	ENSG00000128564	-2.37223	-1.24624	1.16512e-08	4.43673e-07
APC2	ENSG00000115266	-2.11666	-1.08179	1.34574e-08	5.02232e-07
HS3ST3A1	ENSG00000153976	-3.46827	-1.79421	1.47366e-08	5.4198e-07
PLD6	ENSG00000179598	-2.12368	-1.08657	2.12997e-08	7.40327e-07
S100A9	ENSG00000163220	-2.14617	-1.10176	2.22925e-08	7.69862e-07
A2ML1	ENSG00000166535	-7.17266	-2.84251	3.47009e-08	1.13341e-06
BMP2	ENSG00000125845	-2.10723	-1.07534	3.46061e-08	1.13341e-06
FAM89A	ENSG00000182118	-2.5828	-1.36893	3.58011e-08	1.16676e-06
KIF21B	ENSG00000116852	-3.08843	-1.62687	3.72724e-08	1.20408e-06
OSR1	ENSG00000143867	-2.21215	-1.14545	4.15504e-08	1.32438e-06
METRNL	ENSG00000176845	-2.22075	-1.15105	4.29033e-08	1.35745e-06
DLX2	ENSG00000115844	-2.50982	-1.32759	4.34745e-08	1.37149e-06
THBS1	ENSG00000137801	-2.52809	-1.33805	5.03472e-08	1.56309e-06
AC026464.4	ENSG00000260914	-2.53909	-1.34431	5.04777e-08	1.56488e-06
HPDL	ENSG00000186603	-2.30497	-1.20475	5.07402e-08	1.5685e-06
F3	ENSG00000117525	-2.53862	-1.34405	6.09237e-08	1.83325e-06
CARMIL2	ENSG00000159753	-2.64881	-1.40534	6.96925e-08	2.05483e-06
ID2	ENSG00000115738	-3.7041	-1.88912	7.42821e-08	2.17144e-06
GJB4	ENSG00000189433	-2.38055	-1.2513	8.26119e-08	2.38257e-06
SEMA7A	ENSG00000138623	-2.15083	-1.10489	8.9457e-08	2.54634e-06
IVL	ENSG00000163207	-5.70214	-2.5115	1.60586e-07	4.12291e-06
GRAMD1B	ENSG00000023171	-2.93286	-1.55231	1.88754e-07	4.68942e-06
LCE3D	ENSG00000163202	-6.95386	-2.79781	2.16124e-07	5.27202e-06
CSF3	ENSG00000108342	-9.8463	-3.29958	2.1733e-07	5.28942e-06
PGBD5	ENSG00000177614	-6.73005	-2.75062	2.17942e-07	5.29833e-06
RAB3IL1	ENSG00000167994	-2.46102	-1.29925	2.19663e-07	5.31613e-06
NFKBIE	ENSG00000146232	-2.04473	-1.03191	2.85654e-07	6.71678e-06
TMEM158	ENSG00000249992	-2.25166	-1.17099	3.56601e-07	8.09312e-06
BOLA2B	ENSG00000169627	-2.07514	-1.05321	4.00992e-07	8.92176e-06
BDKRB1	ENSG00000100739	-2.42421	-1.27751	4.55547e-07	9.94025e-06
PRDM8	ENSG00000152784	-2.47199	-1.30567	4.57296e-07	9.9645e-06
MRGPRX3	ENSG00000179826	-4.12746	-2.04525	4.85873e-07	1.04745e-05
FOSB	ENSG00000125740	-2.06664	-1.04729	6.80948e-07	1.3941e-05
KCNJ12	ENSG00000184185	-3.09308	-1.62904	7.30362e-07	1.47408e-05
DHRS2	ENSG00000100867	-3.42628	-1.77664	7.64352e-07	1.53405e-05
FRMD3	ENSG00000172159	-7.19187	-2.84637	7.75256e-07	1.54441e-05
KANK4	ENSG00000132854	-3.25469	-1.70252	7.89945e-07	1.56931e-05
IGSF9B	ENSG00000080854	-2.64256	-1.40194	8.55586e-07	1.67802e-05
GPR3	ENSG00000181773	-2.27666	-1.18692	9.00705e-07	1.74583e-05
HIC1	ENSG00000177374	-2.87857	-1.52535	9.80377e-07	1.86867e-05
DLL3	ENSG00000090932	-2.1387	-1.09674	1.18097e-06	2.19988e-05
TGM1	ENSG00000092295	-2.90149	-1.5368	1.1865e-06	2.20826e-05
DUSP2	ENSG00000158050	-3.02017	-1.59463	1.40535e-06	2.55372e-05
RTEL1-TNFRSF6B	ENSG00000026036	-6.39747	-2.6775	1.49978e-06	2.70131e-05
TBC1D30	ENSG00000111490	-2.11511	-1.08074	1.97254e-06	3.37622e-05
CXCL2	ENSG00000081041	-2.72515	-1.44634	2.12028e-06	3.58352e-05
SCO2_1	ENSG00000130489	-2.15878	-1.11022	2.25233e-06	3.77112e-05
BCL2L2-PABPN1	ENSG00000258643	-2.23669	-1.16137	2.33951e-06	3.88683e-05
INHBA	ENSG00000122641	-2.34878	-1.23191	2.90197e-06	4.63519e-05
NR4A1	ENSG00000123358	-2.24642	-1.16763	3.48692e-06	5.42059e-05
RNASE7	ENSG00000165799	-2.80939	-1.49026	3.49869e-06	5.43497e-05
TTC9	ENSG00000133985	-2.0196	-1.01407	3.6113e-06	5.58972e-05
NEURL1	ENSG00000107954	-2.0805	-1.05693	3.65493e-06	5.64913e-05
NAT8L	ENSG00000185818	-2.5015	-1.32279	3.74729e-06	5.77116e-05
PTGS2	ENSG00000073756	-2.46783	-1.30325	4.89711e-06	7.28257e-05
FOXF2	ENSG00000137273	-2.2276	-1.15549	5.15429e-06	7.60063e-05
HIST2H2AA3	ENSG00000203812	-2.2635	-1.17855	5.74971e-06	8.3191e-05
SNCB	ENSG00000074317	-3.17381	-1.66621	6.44696e-06	9.15553e-05
CDA	ENSG00000158825	-2.72761	-1.44764	7.04565e-06	9.82419e-05
NCF2	ENSG00000116701	-3.64137	-1.86448	8.19321e-06	0.000111427
KRT75	ENSG00000170454	-2.95574	-1.56352	8.76858e-06	0.000117616
SLC16A2	ENSG00000147100	-2.58367	-1.36942	9.9035e-06	0.000129765
PRDM1	ENSG00000057657	-2.85357	-1.51277	1.02452e-05	0.000133591
CYP24A1	ENSG00000019186	-2.11446	-1.08029	1.03031e-05	0.000134265
ACTL10	ENSG00000182584	-2.21938	-1.15016	1.0344e-05	0.000134688
FST	ENSG00000134363	-2.16842	-1.11664	1.05563e-05	0.000137309
ALOX15B	ENSG00000179593	-2.77717	-1.47362	1.11381e-05	0.000143753
MMP3	ENSG00000149968	-4.6025	-2.20242	1.31887e-05	0.000164974
NOG	ENSG00000183691	-2.16514	-1.11446	1.41599e-05	0.000175086
SPRR2E	ENSG00000203785	-5.59045	-2.48297	1.70968e-05	0.00020665
SNAI1	ENSG00000124216	-4.1798	-2.06343	1.80307e-05	0.000215996
COL13A1	ENSG00000197467	-2.25301	-1.17185	2.47537e-05	0.000281339
ESM1	ENSG00000164283	-43.143	-5.43105	2.91626e-05	0.000323753
GREM1	ENSG00000166923	-5.24518	-2.39099	3.03186e-05	0.000334859
HIST1H2AK	ENSG00000275221	-7.13933	-2.83579	3.08991e-05	0.000340397
PREX1	ENSG00000124126	-2.53346	-1.34111	3.12063e-05	0.000343411
DSCAM	ENSG00000171587	-2.0252	-1.01807	3.17695e-05	0.000347671
C2CD4C	ENSG00000183186	-2.82828	-1.49992	3.24619e-05	0.000353304
MESP1	ENSG00000166823	-2.90324	-1.53766	3.45828e-05	0.000371282
CXCL1	ENSG00000163739	-9.15049	-3.19385	4.26851e-05	0.000441572
HS3ST2	ENSG00000122254	-3.19336	-1.67508	4.45061e-05	0.000456846
HIST1H4F	ENSG00000274618	-2.17441	-1.12062	5.22618e-05	0.000522739
SMOC1	ENSG00000198732	-2.01233	-1.00887	6.11878e-05	0.000598833
CRCT1	ENSG00000169509	-7.16579	-2.84113	6.2314e-05	0.00060692
IRF9	ENSG00000213928	-2.29076	-1.19583	6.7601e-05	0.000648722
EFR3B	ENSG00000084710	-2.53806	-1.34373	7.97364e-05	0.000743297
FAM220A	ENSG00000178397	-8.29786	-3.05274	0.000104994	0.000940838
EDN1	ENSG00000078401	-2.26817	-1.18153	0.000104988	0.000940838
CFAP157	ENSG00000160401	-2.66259	-1.41283	0.000136524	0.00117446
OAS1	ENSG00000089127	-2.49457	-1.31879	0.0001484	0.00125555
INSC	ENSG00000188487	-10.1654	-3.34559	0.000150445	0.00127034
IFI27	ENSG00000165949	-3.21742	-1.68591	0.000159388	0.00133329
ID4	ENSG00000172201	-6.11948	-2.61341	0.000161358	0.00134619
TMEM171	ENSG00000157111	-2.96749	-1.56924	0.000177405	0.00145794
HIST1H3D	ENSG00000197409	-1273.41	-10.3145	0.000187751	0.0015301
HOXD13	ENSG00000128714	-3.43283	-1.7794	0.000189879	0.00154569
MX1	ENSG00000157601	-2.86951	-1.5208	0.000199218	0.00161013
LGALS7B	ENSG00000178934	-2.19973	-1.13733	0.000228997	0.00180471
RHCG	ENSG00000140519	-8.26954	-3.04781	0.000244258	0.00189788
MAPK8IP2	ENSG00000008735	-2.11691	-1.08196	0.000310397	0.00231801
PALD1	ENSG00000107719	-2.65109	-1.40659	0.000347338	0.0025505
ZNF239	ENSG00000196793	-2.20981	-1.14392	0.000360037	0.00262761
DLL4	ENSG00000128917	-3.09772	-1.63121	0.000376056	0.00272328
HOXB9	ENSG00000170689	-2.36743	-1.24332	0.000419854	0.00298814
CPLX1	ENSG00000168993	-4.89693	-2.29188	0.000433793	0.00307312
CXCL3	ENSG00000163734	-3.13436	-1.64817	0.000437172	0.00309095
NRCAM	ENSG00000091129	-2.7378	-1.45302	0.00045122	0.00317774
ARNT2	ENSG00000172379	-2.33085	-1.22086	0.000467936	0.00327509
TM4SF19	ENSG00000145107	-2.64969	-1.40582	0.000499699	0.0034547
FZD9	ENSG00000188763	-2.5997	-1.37835	0.000560992	0.00379791
NPIPA9	ENSG00000233024	-2.14233	-1.09918	0.00057107	0.00385751
KRT81	ENSG00000205426	-12.038	-3.58952	0.000590584	0.00395962
TMEM45B	ENSG00000151715	-5.20974	-2.38121	0.000620526	0.00411548
MYO7B	ENSG00000169994	-9.65379	-3.2711	0.000668563	0.0043774
IFI6	ENSG00000126709	-2.50346	-1.32392	0.000708917	0.00460518
RASA4B	ENSG00000170667	-2.39147	-1.2579	0.000725912	0.00467745
GSDMA	ENSG00000167914	-6.22741	-2.63863	0.000730973	0.00470724
IL32	ENSG00000008517	-2.67158	-1.41769	0.000891656	0.00557511
HCLS1	ENSG00000180353	-2.12582	-1.08802	0.000916732	0.00569883
UFSP1	ENSG00000176125	-2.21755	-1.14897	0.00104381	0.00636757
FOXC2	ENSG00000176692	-2.19024	-1.13109	0.00104958	0.00639892
SPRR3	ENSG00000163209	-3.10954	-1.6367	0.00107055	0.00648816
LRFN1	ENSG00000128011	-2.19703	-1.13556	0.0010881	0.00658709
ASPRV1	ENSG00000244617	-2.74119	-1.4548	0.00130729	0.00764302
AC008012.1	ENSG00000285901	-2.40767	-1.26764	0.00133089	0.00776625
FLNC	ENSG00000128591	-2.56212	-1.35734	0.0014392	0.0082638
MYH14	ENSG00000105357	-4.30831	-2.10712	0.00144017	0.00826715
TMEM92	ENSG00000167105	-2.77846	-1.47428	0.00169946	0.00954669
IFNK	ENSG00000147896	-2.37448	-1.24761	0.00185845	0.0103079
ZNF365	ENSG00000138311	-2.47334	-1.30646	0.00197806	0.0108566
IGFL1	ENSG00000188293	-2.59708	-1.37689	0.00202126	0.0110458
PIK3AP1	ENSG00000155629	-4.0761	-2.02719	0.00224347	0.0120369
KRT1	ENSG00000167768	-11.2904	-3.49702	0.00259221	0.0135598
CEACAM1	ENSG00000079385	-2.02991	-1.02142	0.00282311	0.0145448
LCN2	ENSG00000148346	-2.36351	-1.24093	0.00312031	0.0157185
SLC44A4	ENSG00000204385	-3.62221	-1.85687	0.00322939	0.0161921
NCCRP1	ENSG00000188505	-8.76475	-3.13171	0.003636	0.0179423
HCAR3	ENSG00000255398	-4.56409	-2.19033	0.00367907	0.0181216
PRRX2	ENSG00000167157	-7.03264	-2.81407	0.00391374	0.0190766
SMKR1	ENSG00000240204	-2.8414	-1.5066	0.00397818	0.0193338
FOXD2	ENSG00000186564	-2.02324	-1.01667	0.0040628	0.0196739
KIF17	ENSG00000117245	-2.51233	-1.32903	0.00412405	0.0199122
IL11	ENSG00000095752	-2.14433	-1.10053	0.00437275	0.0209485
ROBO4	ENSG00000154133	-2.41151	-1.26994	0.00452202	0.0215348
RGS16	ENSG00000143333	-2.87152	-1.52181	0.00453412	0.0215822
OR2W3	ENSG00000238243	-2.33684	-1.22456	0.00457917	0.021763
ICAM4	ENSG00000105371	-5.39681	-2.43211	0.00467137	0.0221181
RELN	ENSG00000189056	-3.09368	-1.62932	0.00467358	0.0221237
SAMD11	ENSG00000187634	-2.77257	-1.47123	0.00470512	0.0222436
AC023055.1	ENSG00000257390	-147.261	-7.20223	0.004834	0.022728
AL139011.2	ENSG00000258465	-8.18057	-3.0322	0.00511451	0.0238128
DNAH3	ENSG00000158486	-3.73045	-1.89935	0.00521592	0.0241907
WNT10B	ENSG00000169884	-2.52098	-1.33398	0.00534204	0.0246957
EDNRA	ENSG00000151617	-3.73683	-1.90182	0.00552174	0.0253522
C17orf67	ENSG00000214226	-2.10599	-1.0745	0.00555681	0.0254969
SPRR2A	ENSG00000241794	-3.40217	-1.76646	0.00561174	0.0256887
PRDM12	ENSG00000130711	-2.30333	-1.20372	0.006157	0.0277304
SLAMF9	ENSG00000162723	-3.38532	-1.75929	0.00664863	0.0295976
SULT2B1	ENSG00000088002	-2.32195	-1.21534	0.00668938	0.0297482
AL136295.1	ENSG00000254692	-8.80461	-3.13826	0.00669486	0.0297603
SOCS1	ENSG00000185338	-2.11823	-1.08286	0.00695524	0.0307273
TUBAL3	ENSG00000178462	-3.19548	-1.67603	0.00730444	0.0320528
CDH16	ENSG00000166589	-13.1267	-3.71443	0.00775085	0.0337228
FNDC7	ENSG00000143107	-12.4156	-3.63409	0.00786075	0.0341114
C11orf96	ENSG00000187479	-5.28218	-2.40113	0.00800893	0.0346495
KLK6	ENSG00000167755	-4.11031	-2.03925	0.00813404	0.035085
KLK7	ENSG00000169035	-2.91107	-1.54155	0.00833308	0.0357865
ADRA1D	ENSG00000171873	-2.7248	-1.44615	0.00875289	0.037276
PRR9	ENSG00000203783	-7.12529	-2.83295	0.00881276	0.037479
HSH2D	ENSG00000196684	-3.31804	-1.73033	0.00948063	0.0399575
TFR2	ENSG00000106327	-2.09162	-1.06462	0.00957436	0.0403077
GCNA	ENSG00000147174	-2.20713	-1.14217	0.00971944	0.0408345
AL359922.1	ENSG00000264545	-2.4517	-1.29378	0.00980658	0.0410883
SERPINB3	ENSG00000057149	-2.66709	-1.41527	0.0104204	0.0431976
GDA	ENSG00000119125	-4.51646	-2.17519	0.010923	0.0448402
AL451062.3	ENSG00000284989	-118.833	-6.89279	0.0115406	0.0469103
HTR1D	ENSG00000179546	-2.199	-1.13685	0.0119221	0.048224
NCF1	ENSG00000158517	-2.27389	-1.18516	0.0120852	0.0487739
ITGB3	ENSG00000259207	-11.1239	-3.4756	0.0122829	0.0494417
NGF	ENSG00000134259	-2.26947	-1.18235	0.0122862	0.049446
JPH3	ENSG00000154118	-3.58622	-1.84246	0.0123542	0.0496081
