# Supplementary material for: Endo180 and basement membrane stiffness induce OXPHOS and neoplasia in aging prostate epithelia
Source: Research Square preprint supplement (doi:10.21203/rs.3.rs-4837876/v1), 2024-09-19
Supplement: Supplementary file 3 [file 339b8eac5ce3daec8bfdd8f0.xlsx]

## Sheet: 47 UP DEGs Ctrl & Wt
Supplementary data 5. DEGs in Wt/Ctrl intersect and KO only (stiff-BM versus native-BM)
	Ensembl Identifier	Wild type				Ctrl
		Fold change (FC ≥ 2)	Log fold change	p value (p < 0.05)	FDR p value (p < 0.05)	Fold change (FC ≥ 2)	Log fold change	p value (p < 0.05)	FDR p value (p < 0.05)
ADSSL1	ENSG00000185100	2.46769	1.30316	3.46285e-06	0.000123159	2.10982	1.07712	2.55496e-05	0.000198305
ANKRD26	ENSG00000107890	2.33785	1.22518	9.56554e-07	4.50334e-05	2.17073	1.11818	9.04265e-06	8.01948e-05
ANKRD36C	ENSG00000174501	2.20504	1.14081	5.06881e-07	2.71282e-05	2.59899	1.37795	1.70195e-09	4.54312e-08
ARID4A	ENSG00000032219	2.02444	1.01752	3.76368e-05	0.00077193	2.03643	1.02604	2.92879e-05	0.000223463
ATP10A	ENSG00000206190	2.21066	1.14448	0.00820933	0.0463823	2.57877	1.36668	0.000346366	0.00193259
CFAP44	ENSG00000206530	3.04878	1.60823	8.30335e-06	0.000245057	3.83237	1.93824	6.08366e-07	7.63652e-06
CFAP70	ENSG00000156042	2.73982	1.45408	0.00518911	0.0328944	3.0858	1.62564	0.000813688	0.00409988
DEPTOR	ENSG00000155792	2.26895	1.18203	0.00377651	0.0257366	2.55217	1.35173	0.000399236	0.00218786
DST	ENSG00000151914	2.09521	1.0671	1.0694e-08	1.21096e-06	2.04764	1.03396	3.46461e-08	6.23776e-07
ECM2	ENSG00000106823	3.38425	1.75884	0.000973904	0.00912611	2.87948	1.52581	0.00254106	0.0109649
ERV3-1	ENSG00000213462	2.42177	1.27606	0.000221131	0.00295688	2.26407	1.17892	0.000325656	0.00183368
FANCM	ENSG00000187790	2.07055	1.05002	7.05056e-07	3.54095e-05	2.09455	1.06664	6.12755e-07	7.68265e-06
KLF15	ENSG00000163884	4.54587	2.18456	0.0034372	0.0239946	2.36312	1.24069	0.00323721	0.0135529
LINC00672	ENSG00000263874	4.79818	2.26249	0.00639847	0.0382716	3.75676	1.90949	0.00650165	0.0246925
LSM8	ENSG00000128534	2.00513	1.0037	4.37475e-08	3.88937e-06	2.00406	1.00293	5.20726e-08	8.85645e-07
MARCH1	ENSG00000145416	2.3023	1.20308	0.00536898	0.0336872	3.36383	1.75011	0.000158411	0.000977125
MT-ATP6	ENSG00000198899	10.3264	3.36827	9.72555e-14	5.36526e-11	2.94073	1.55617	0.000542284	0.00285682
MT-ATP8	ENSG00000228253	22.0957	4.4657	0	0	4.22461	2.07882	1.3551e-07	2.07509e-06
MT-CO2	ENSG00000198712	5.22673	2.38591	8.68374e-08	6.55546e-06	2.21448	1.14697	0.0100046	0.0359047
MT-CYB	ENSG00000198727	2.55411	1.35282	3.38857e-09	4.8244e-07	2.2176	1.149	5.16495e-07	6.69018e-06
MT-ND1	ENSG00000198888	7.87767	2.97777	2.77189e-12	1.08431e-09	2.85594	1.51397	0.000360323	0.00200009
MT-ND2	ENSG00000198763	10.3487	3.37138	6.10623e-15	4.05346e-12	2.88286	1.5275	0.000383423	0.00211197
MT-ND3	ENSG00000198840	6.4925	2.69877	2.799e-10	5.64423e-08	2.52218	1.33467	0.00146286	0.00682575
MT-ND4	ENSG00000198886	7.92861	2.98707	4.35152e-12	1.48608e-09	2.80418	1.48758	0.000546409	0.00287714
MT-ND4L	ENSG00000212907	10.0335	3.32676	9.99201e-16	8.59912e-13	4.22193	2.0779	1.91298e-07	2.81133e-06
MT-ND5	ENSG00000198786	6.95272	2.79758	1.83742e-13	8.98456e-11	3.268	1.70841	6.59497e-06	6.06856e-05
MT-ND6	ENSG00000198695	8.55545	3.09684	9.25926e-14	5.24245e-11	3.73144	1.89973	3.85223e-06	3.78797e-05
NBEA	ENSG00000172915	3.00821	1.58891	0.00014979	0.00220584	2.38052	1.25127	0.00319217	0.0133748
NMRK1	ENSG00000106733	2.18364	1.12673	0.000436302	0.00493754	2.17104	1.11839	0.000139005	0.00087065
OGN	ENSG00000106809	3.69396	1.88517	0.00732551	0.0424304	3.96622	1.98776	0.00631479	0.0241019
PAPLN	ENSG00000100767	2.0659	1.04677	0.00169173	0.0140585	2.04086	1.02918	0.000885066	0.00440689
PLIN4	ENSG00000167676	2.68849	1.4268	2.63276e-08	2.55152e-06	2.63231	1.39633	3.52855e-10	1.11811e-08
RAD51AP1	ENSG00000111247	2.12504	1.08749	1.02672e-06	4.72007e-05	2.13907	1.09698	2.04359e-06	2.20611e-05
RGPD8	ENSG00000169629	2.0707	1.05012	0.00478143	0.0308741	2.71625	1.44162	0.000136868	0.000858267
SCNN1B	ENSG00000168447	2.37667	1.24894	0.00728401	0.0422744	4.93842	2.30405	2.27319e-06	2.40333e-05
SLC7A11	ENSG00000151012	2.0673	1.04774	4.44894e-09	5.94528e-07	2.90517	1.53862	0	0
SPTSSB	ENSG00000196542	2.61071	1.38444	0.00720822	0.0419179	2.53806	1.34373	0.0132444	0.0457315
TBC1D32	ENSG00000146350	2.49223	1.31744	7.38629e-09	8.92786e-07	2.48459	1.31301	6.69322e-09	1.50005e-07
TSLP	ENSG00000145777	2.32917	1.21982	0.00085897	0.00826878	2.97288	1.57186	2.02429e-06	2.19298e-05
TTC14	ENSG00000163728	2.06575	1.04667	2.3113e-09	3.52678e-07	2.27283	1.18449	4.65012e-11	1.88059e-09
VANGL2	ENSG00000162738	2.18569	1.12809	0.000622668	0.00648436	2.51341	1.32965	0.00303456	0.0127917
ZBED9	ENSG00000232040	2.01661	1.01194	8.0429e-06	0.000240672	2.03744	1.02676	4.91906e-06	4.69745e-05
ZNF248	ENSG00000198105	2.02714	1.01944	1.05501e-05	0.000292884	2.39336	1.25904	9.16693e-08	1.46855e-06
ZNF396	ENSG00000186496	4.62906	2.21072	0.00278101	0.0203691	3.81358	1.93115	0.00373871	0.0153508
ZNF415	ENSG00000170954	2.8086	1.48985	0.00260463	0.0194269	2.54095	1.34537	0.00139387	0.00654588
ZNF563	ENSG00000188868	2.10457	1.07352	0.00128834	0.0113599	2.09942	1.06999	0.00121292	0.00580945
ZNF91	ENSG00000167232	2.64645	1.40406	3.85672e-06	0.000134267	2.00402	1.0029	0.00101852	0.00498941

## Sheet: 10 DN DEGs Ctrl & Wt
Supplementary data 5. DEGs in Wt/Ctrl intersect and KO only (stiff-BM versus native-BM)
Gene name	Ensembl Identifier	Wild type				Ctrl
		Fold change (FC ≤ -2)	Log fold change	p value (p < 0.05)	FDR p value (p < 0.05)	Fold change (FC ≤ -2)	Log fold change	p value (p < 0.05)	FDR p value (p < 0.05)
AC120114.4	ENSG00000281348	-3.08904	-1.62716	4.03725e-06	0.000139335	-2.22899	-1.15639	0.0010067	0.0049371
ALPP	ENSG00000163283	-5.35712	-2.42146	0.000636189	0.006587	-4.14319	-2.05074	0.00416452	0.0168262
G0S2	ENSG00000123689	-2.83843	-1.5051	1.43091e-05	0.000365196	-3.51078	-1.81179	1.0183e-05	8.90645e-05
GOLGA7B	ENSG00000155265	-5.76741	-2.52792	1.49541e-07	1.00858e-05	-2.22971	-1.15685	0.00632904	0.0241435
KLF7	ENSG00000118263	-2.00539	-1.00388	1.33978e-10	3.03424e-08	-2.261	-1.17696	7.10543e-14	5.92532e-12
MSX1	ENSG00000163132	-3.8109	-1.93013	0.0055848	0.0346177	-3.61782	-1.85512	0.00203453	0.00903278
NDUFC2-KCTD14	ENSG00000259112	-5.5686	-2.47732	0.00625273	0.03763	-6.81754	-2.76925	0.000864358	0.00431978
PLCB2	ENSG00000137841	-2.30763	-1.20641	0.00627061	0.037685	-5.3825	-2.42828	6.0032e-06	5.5744e-05
SDCBP2	ENSG00000125775	-2.03482	-1.0249	3.20866e-09	4.60229e-07	-3.15755	-1.6588	0	0
ZNF320	ENSG00000182986	-3.95013	-1.9819	0.000378387	0.00443758	-3.75292	-1.90801	0.000419535	0.00228095

## Sheet: 119 UP DEGs KO only
Supplementary data 5. DEGs in Wt/Ctrl intersect and KO only (stiff-BM versus native-BM)
Gene name	Ensembl Identifier	Fold change (FC ≥ 2)	Log fold change	p value (p < 0.05)	FDR p value (p < 0.05)
AC025283.2	ENSG00000262621	100.38	6.64932	0.0286006	0.0286006
AC010487.3	ENSG00000283088	73.8495	6.20652	0.0408417	0.0408417
CLDN2	ENSG00000165376	9.27724	3.2137	0.01552	0.01552
AMT	ENSG00000145020	8.61144	3.10625	0.0124561	0.0124561
DISP3	ENSG00000204624	8.39451	3.06945	0.02555	0.02555
WDR63	ENSG00000162643	8.03065	3.00552	0.000163901	0.000163901
B3GAT2	ENSG00000112309	6.52677	2.70637	0.0241444	0.0241444
SPDEF	ENSG00000124664	5.40844	2.43521	0.00086978	0.00086978
FAM151B	ENSG00000152380	5.28166	2.40099	0.0184562	0.0184562
ZNF320	ENSG00000182986	5.16948	2.37002	0.000224455	0.000224455
ZCWPW2	ENSG00000206559	4.60003	2.20164	0.0410883	0.0410883
CCNI2	ENSG00000205089	4.41086	2.14106	0.0154369	0.0154369
SLC15A2	ENSG00000163406	4.33231	2.11514	0.0378069	0.0378069
AL157392.5	ENSG00000282246	3.94081	1.97849	0.017804	0.017804
AC007192.1	ENSG00000268173	3.52127	1.81609	0.00901655	0.00901655
UGT1A1	ENSG00000241635	3.46058	1.79101	0.00635221	0.00635221
CCDC169	ENSG00000242715	3.32221	1.73214	0.00378204	0.00378204
ST8SIA6	ENSG00000148488	3.26523	1.70718	0.0447289	0.0447289
ZNF540	ENSG00000171817	3.22792	1.69061	0.0251793	0.0251793
C15orf65	ENSG00000261652	3.13455	1.64826	0.011383	0.011383
RIMBP3	ENSG00000275793	2.86852	1.5203	0.000113021	0.000113021
ZNF439	ENSG00000171291	2.85113	1.51153	0.0116323	0.0116323
CCDC121	ENSG00000176714	2.73851	1.45339	0.00976848	0.00976848
PRKACB	ENSG00000142875	2.71679	1.4419	2.84981e-05	2.84981e-05
ZNF487	ENSG00000243660	2.69084	1.42806	0.00281571	0.00281571
NWD1	ENSG00000188039	2.6894	1.42728	7.21411e-07	7.21411e-07
ZNF25	ENSG00000175395	2.67956	1.422	1.86867e-05	1.86867e-05
SERPINF1	ENSG00000132386	2.64388	1.40266	0.000668332	0.000668332
TG	ENSG00000042832	2.62734	1.3936	0.0385924	0.0385924
IFITM10	ENSG00000244242	2.59964	1.37831	0.0494792	0.0494792
CYS1	ENSG00000205795	2.59544	1.37598	0.0225896	0.0225896
CDKL2	ENSG00000138769	2.59126	1.37365	0.0459175	0.0459175
IFT74	ENSG00000096872	2.58347	1.36931	2.34038e-06	2.34038e-06
GLT8D2	ENSG00000120820	2.55701	1.35446	0.00320559	0.00320559
FAM171B	ENSG00000144369	2.53793	1.34365	0.00620215	0.00620215
SPOCK1	ENSG00000152377	2.50966	1.32749	9.86308e-09	9.86308e-09
ZNF92	ENSG00000146757	2.50204	1.3231	0.00192243	0.00192243
SLC2A13	ENSG00000151229	2.49603	1.31964	0.0122977	0.0122977
TREX2	ENSG00000183479	2.47752	1.3089	0.0115915	0.0115915
IFT80	ENSG00000068885	2.43372	1.28316	2.56837e-08	2.56837e-08
COMMD8	ENSG00000169019	2.38487	1.25391	6.07953e-07	6.07953e-07
SPATA17	ENSG00000162814	2.38417	1.25349	0.0269009	0.0269009
EFCAB7	ENSG00000203965	2.3669	1.243	5.17894e-05	5.17894e-05
ADAMTS7	ENSG00000136378	2.33888	1.22582	5.45514e-09	5.45514e-09
MOXD1	ENSG00000079931	2.33546	1.22371	0.0135514	0.0135514
BRMS1L	ENSG00000100916	2.3346	1.22318	8.07438e-08	8.07438e-08
SMIM10L2A	ENSG00000178947	2.3129	1.2097	0.0225343	0.0225343
GXYLT1	ENSG00000151233	2.29627	1.19929	2.75888e-07	2.75888e-07
TPK1	ENSG00000196511	2.29298	1.19723	0.0385924	0.0385924
UFL1	ENSG00000014123	2.27835	1.18799	1.47097e-08	1.47097e-08
ZNF704	ENSG00000164684	2.27582	1.18639	6.63757e-07	6.63757e-07
SMPDL3A	ENSG00000172594	2.26417	1.17898	0.00233961	0.00233961
ZNF714	ENSG00000160352	2.25382	1.17237	2.67134e-06	2.67134e-06
PLOD2	ENSG00000152952	2.25369	1.17229	2.07236e-09	2.07236e-09
COL5A2	ENSG00000204262	2.25179	1.17107	0.0443141	0.0443141
TSGA10	ENSG00000135951	2.21599	1.14795	0.0434791	0.0434791
ZNF136	ENSG00000196646	2.21443	1.14693	0.000673625	0.000673625
FAM102B	ENSG00000162636	2.21308	1.14605	4.84404e-07	4.84404e-07
ARMT1	ENSG00000146476	2.20635	1.14166	1.44172e-08	1.44172e-08
AK9	ENSG00000155085	2.20396	1.1401	0.0402242	0.0402242
KCNMB4	ENSG00000135643	2.18584	1.12819	0.00070653	0.00070653
ADAM32	ENSG00000197140	2.18185	1.12555	0.011187	0.011187
XRCC4	ENSG00000152422	2.16914	1.11713	5.77626e-07	5.77626e-07
SNX4	ENSG00000114520	2.16541	1.11464	1.06805e-06	1.06805e-06
CENPF	ENSG00000117724	2.15328	1.10653	2.2034e-07	2.2034e-07
KTN1	ENSG00000126777	2.13998	1.09759	1.5685e-06	1.5685e-06
SLC39A10	ENSG00000196950	2.13838	1.09652	1.58421e-07	1.58421e-07
CUL4B	ENSG00000158290	2.13782	1.09614	7.38053e-09	7.38053e-09
EFEMP1	ENSG00000115380	2.1363	1.09511	0	0
AEBP2	ENSG00000139154	2.13603	1.09493	5.65111e-08	5.65111e-08
SMC2	ENSG00000136824	2.13282	1.09276	2.9939e-07	2.9939e-07
TEX15	ENSG00000133863	2.13083	1.09142	0.00111936	0.00111936
EMB	ENSG00000170571	2.1264	1.08841	1.87894e-08	1.87894e-08
SLC16A14	ENSG00000163053	2.12048	1.08439	4.70067e-08	4.70067e-08
SLITRK6	ENSG00000184564	2.10789	1.0758	3.46187e-05	3.46187e-05
ALCAM	ENSG00000170017	2.10766	1.07564	1.962e-08	1.962e-08
KIF20B	ENSG00000138182	2.10454	1.0735	0.000398311	0.000398311
EGLN3	ENSG00000129521	2.10315	1.07255	0.00943614	0.00943614
DEK	ENSG00000124795	2.1018	1.07163	5.65162e-07	5.65162e-07
ESCO2	ENSG00000171320	2.10146	1.07139	1.40664e-07	1.40664e-07
ESCO1	ENSG00000141446	2.09992	1.07033	2.52472e-05	2.52472e-05
KIF18A	ENSG00000121621	2.09824	1.06918	5.04635e-06	5.04635e-06
NHLH2	ENSG00000177551	2.09781	1.06888	0.0439155	0.0439155
PCGF5	ENSG00000180628	2.09685	1.06822	2.21801e-06	2.21801e-06
PRKAA2	ENSG00000162409	2.09573	1.06746	0.00263938	0.00263938
CROT	ENSG00000005469	2.09247	1.0652	3.27957e-08	3.27957e-08
CENPQ	ENSG00000031691	2.08137	1.05753	0.00133168	0.00133168
SERTAD4	ENSG00000082497	2.07555	1.05349	3.4026e-07	3.4026e-07
P2RX6	ENSG00000099957	2.07413	1.05251	0.0184971	0.0184971
VSNL1	ENSG00000163032	2.07361	1.05214	0.0368283	0.0368283
ZNF180	ENSG00000167384	2.07157	1.05073	1.13374e-05	1.13374e-05
HOXA13	ENSG00000106031	2.06943	1.04923	0.0488555	0.0488555
ANK1	ENSG00000029534	2.06659	1.04725	0.00784662	0.00784662
MDFIC	ENSG00000135272	2.06538	1.0464	2.26215e-08	2.26215e-08
RCBTB2	ENSG00000136161	2.06131	1.04356	3.1008e-06	3.1008e-06
SASS6	ENSG00000156876	2.04721	1.03366	0.000470217	0.000470217
ZNF483	ENSG00000173258	2.04381	1.03126	1.00734e-05	1.00734e-05
GIN1	ENSG00000145723	2.03934	1.02811	0.000410414	0.000410414
GAB1	ENSG00000109458	2.03696	1.02642	7.61911e-08	7.61911e-08
SPAST	ENSG00000021574	2.03695	1.02641	4.97578e-08	4.97578e-08
SCAMP1	ENSG00000085365	2.03603	1.02576	2.21133e-08	2.21133e-08
ARL5A	ENSG00000162980	2.0336	1.02403	1.64192e-07	1.64192e-07
ITGB6	ENSG00000115221	2.02655	1.01903	1.76946e-07	1.76946e-07
SH3BGRL	ENSG00000131171	2.02554	1.0183	0.00162142	0.00162142
CNTLN	ENSG00000044459	2.02354	1.01688	2.40035e-05	2.40035e-05
OSBPL8	ENSG00000091039	2.02026	1.01454	5.18772e-06	5.18772e-06
SLC1A1	ENSG00000106688	2.01745	1.01253	0.022751	0.022751
PPP2R3A	ENSG00000073711	2.0172	1.01235	3.06099e-06	3.06099e-06
SMC5	ENSG00000198887	2.0146	1.0105	0.000147496	0.000147496
AKAP6	ENSG00000151320	2.01422	1.01022	0.000372186	0.000372186
APPL1	ENSG00000157500	2.01369	1.00984	7.77335e-07	7.77335e-07
UBR3	ENSG00000144357	2.01328	1.00955	1.10904e-09	1.10904e-09
FGD4	ENSG00000139132	2.00834	1.006	1.33641e-08	1.33641e-08
POLK	ENSG00000122008	2.00692	1.00498	3.43175e-06	3.43175e-06
TTK	ENSG00000112742	2.00582	1.00419	8.78583e-08	8.78583e-08
ELAVL2	ENSG00000107105	2.00234	1.00169	1.23824e-07	1.23824e-07
CAVIN2	ENSG00000168497	2.00142	1.00103	1.2235e-07	1.2235e-07
INPP5D	ENSG00000168918	2.00133	1.00096	1.33529e-07	1.33529e-07
TMX1	ENSG00000139921	2.00044	1.00032	1.30013e-07	1.30013e-07

## Sheet: 71 DN DEGs KO only
Supplementary data 5. DEGs in Wt/Ctrl intersect and KO only (stiff-BM versus native-BM)
Gene name	Ensembl Identifier	Fold change (FC ≤ 2)	Log fold change	p value (p < 0.05)	FDR p value (p < 0.05)
AL451062.3	ENSG00000284989	-118.833	-6.89279	0.0115406	0.0469103
CDH16	ENSG00000166589	-13.1267	-3.71443	0.00775085	0.0337228
FNDC7	ENSG00000143107	-12.4156	-3.63409	0.00786075	0.0341114
KRT1	ENSG00000167768	-11.2904	-3.49702	0.00259221	0.0135598
ITGB3	ENSG00000259207	-11.1239	-3.4756	0.0122829	0.0494417
AL136295.1	ENSG00000254692	-8.80461	-3.13826	0.00669486	0.0297603
NCCRP1	ENSG00000188505	-8.76475	-3.13171	0.003636	0.0179423
FAM220A	ENSG00000178397	-8.29786	-3.05274	0.000104994	0.000940838
AL139011.2	ENSG00000258465	-8.18057	-3.0322	0.00511451	0.0238128
HIST1H2AK	ENSG00000275221	-7.13933	-2.83579	3.08991e-05	0.000340397
RTEL1-TNFRSF6B	ENSG00000026036	-6.39747	-2.6775	1.49978e-06	2.70131e-05
ICAM4	ENSG00000105371	-5.39681	-2.43211	0.00467137	0.0221181
C11orf96	ENSG00000187479	-5.28218	-2.40113	0.00800893	0.0346495
CPLX1	ENSG00000168993	-4.89693	-2.29188	0.000433793	0.00307312
HCAR3	ENSG00000255398	-4.56409	-2.19033	0.00367907	0.0181216
GDA	ENSG00000119125	-4.51646	-2.17519	0.010923	0.0448402
MYH14	ENSG00000105357	-4.30831	-2.10712	0.00144017	0.00826715
KLK6	ENSG00000167755	-4.11031	-2.03925	0.00813404	0.035085
EDNRA	ENSG00000151617	-3.73683	-1.90182	0.00552174	0.0253522
DNAH3	ENSG00000158486	-3.73045	-1.89935	0.00521592	0.0241907
SLC44A4	ENSG00000204385	-3.62221	-1.85687	0.00322939	0.0161921
JPH3	ENSG00000154118	-3.58622	-1.84246	0.0123542	0.0496081
HOXD13	ENSG00000128714	-3.43283	-1.7794	0.000189879	0.00154569
SPRR3	ENSG00000163209	-3.10954	-1.6367	0.00107055	0.00648816
RELN	ENSG00000189056	-3.09368	-1.62932	0.00467358	0.0221237
KIF21B	ENSG00000116852	-3.08843	-1.62687	3.72724e-08	1.20408e-06
KLK7	ENSG00000169035	-2.91107	-1.54155	0.00833308	0.0357865
PRDM1	ENSG00000057657	-2.85357	-1.51277	1.02452e-05	0.000133591
SMKR1	ENSG00000240204	-2.8414	-1.5066	0.00397818	0.0193338
C2CD4C	ENSG00000183186	-2.82828	-1.49992	3.24619e-05	0.000353304
SAMD11	ENSG00000187634	-2.77257	-1.47123	0.00470512	0.0222436
ASPRV1	ENSG00000244617	-2.74119	-1.4548	0.00130729	0.00764302
AQP3	ENSG00000165272	-2.72681	-1.44721	3.00158e-10	2.02442e-08
SERPINB3	ENSG00000057149	-2.66709	-1.41527	0.0104204	0.0431976
CFAP157	ENSG00000160401	-2.66259	-1.41283	0.000136524	0.00117446
TM4SF19	ENSG00000145107	-2.64969	-1.40582	0.000499699	0.0034547
FLNC	ENSG00000128591	-2.56212	-1.35734	0.0014392	0.0082638
KIF17	ENSG00000117245	-2.51233	-1.32903	0.00412405	0.0199122
PTGS2	ENSG00000073756	-2.46783	-1.30325	4.89711e-06	7.28257e-05
AL359922.1	ENSG00000264545	-2.4517	-1.29378	0.00980658	0.0410883
UNC13D	ENSG00000092929	-2.44969	-1.2926	1.23951e-09	6.61739e-08
SOCS3	ENSG00000184557	-2.42781	-1.27965	3.4972e-14	7.52423e-12
RASA4B	ENSG00000170667	-2.39147	-1.2579	0.000725912	0.00467745
IFNK	ENSG00000147896	-2.37448	-1.24761	0.00185845	0.0103079
ARG2	ENSG00000081181	-2.37362	-1.24709	1.76339e-10	1.29045e-08
HOXB9	ENSG00000170689	-2.36743	-1.24332	0.000419854	0.00298814
LCN2	ENSG00000148346	-2.36351	-1.24093	0.00312031	0.0157185
NCF1	ENSG00000158517	-2.27389	-1.18516	0.0120852	0.0487739
EDN1	ENSG00000078401	-2.26817	-1.18153	0.000104988	0.000940838
NR4A1	ENSG00000123358	-2.24642	-1.16763	3.48692e-06	5.42059e-05
BCL2L2-PABPN1	ENSG00000258643	-2.23669	-1.16137	2.33951e-06	3.88683e-05
METRNL	ENSG00000176845	-2.22075	-1.15105	4.29033e-08	1.35745e-06
OSR1	ENSG00000143867	-2.21215	-1.14545	4.15504e-08	1.32438e-06
ZNF239	ENSG00000196793	-2.20981	-1.14392	0.000360037	0.00262761
GCNA	ENSG00000147174	-2.20713	-1.14217	0.00971944	0.0408345
HTR1D	ENSG00000179546	-2.199	-1.13685	0.0119221	0.048224
LRFN1	ENSG00000128011	-2.19703	-1.13556	0.0010881	0.00658709
HIST1H4F	ENSG00000274618	-2.17441	-1.12062	5.22618e-05	0.000522739
SMOX	ENSG00000088826	-2.16882	-1.11691	1.42911e-10	1.06025e-08
RELB	ENSG00000104856	-2.16177	-1.11221	2.39597e-12	3.30445e-10
HCLS1	ENSG00000180353	-2.12582	-1.08802	0.000916732	0.00569883
PLD6	ENSG00000179598	-2.12368	-1.08657	2.12997e-08	7.40327e-07
SOCS1	ENSG00000185338	-2.11823	-1.08286	0.00695524	0.0307273
ADRB2	ENSG00000169252	-2.11037	-1.07749	3.39218e-12	4.53308e-10
C17orf67	ENSG00000214226	-2.10599	-1.0745	0.00555681	0.0254969
TFR2	ENSG00000106327	-2.09162	-1.06462	0.00957436	0.0403077
NEURL1	ENSG00000107954	-2.0805	-1.05693	3.65493e-06	5.64913e-05
BOLA2B	ENSG00000169627	-2.07514	-1.05321	4.00992e-07	8.92176e-06
NFKBIE	ENSG00000146232	-2.04473	-1.03191	2.85654e-07	6.71678e-06
FOXD2	ENSG00000186564	-2.02324	-1.01667	0.0040628	0.0196739
TTC9	ENSG00000133985	-2.0196	-1.01407	3.6113e-06	5.58972e-05
