# Supplementary material for: Endo180 and basement membrane stiffness induce OXPHOS and neoplasia in aging prostate epithelia
Source: Research Square preprint supplement (doi:10.21203/rs.3.rs-4837876/v1), 2024-09-19
Supplement: Supplementary file 4 [file 5ece8279b034d759da561d1d.xlsx]

## Sheet: Sheet1
Supplementary data 9. Repressed cancer hallmark gene enrichments linked to Endo180 expression in prostate acini in stiff-BM versus native-BM
DEGs set	Cancer Hallmark Term	Gene_set	Overlap	p-value	Adjusted p-value	Odds Ratio	Combined Score	Genes	Hallmarks Ratio
Wild-type DN (n = 144)	Sustaining proliferative signals	gsea_hallmarks.gmt	47/3574	0.00992072	0.0198414	1.56471	7.21819	CALML5, CSF2, CSF3, CXCL1, CXCL2, CXCL8, DUSP2, DUSP4, DUSP5, ECM1, ESM1, FOSL1, FST, FZD8, FZD9, GPR156, HES5, HSH2D, ID1, ID2, ID4, IL1B, IL6, IL11, IL24, IL32, IMRGPRX3, IRF9, KRT6A, MAPK8IP2, MMP1, MX1, NOS3, NPR1, ODC1, PLCB2, PPP2R2C, PTGES, PTHLH, RAPGEF3, SH2D2A, SLC16A2, SNAI1, SPHK1, TGFA, TGM1, TBXA2R	0.924662
	Genome inestability	gsea_hallmarks.gmt	2/747	0.994687	0.994687	0.332086	0.00176901	BIVM-ERCC5, IGFBP3	0.188256
	Evading growth suppressors	gsea_hallmarks.gmt	41/3288	0.0381717	0.054531	1.43342	4.68105	CALML5, CSF3, CXCL1, CXCL2, CXCL8, CYP24A1, DHRS2, ECM1, FOSL1, FST, FZD8, FZD9, GPR156, HSH2D, ID1, ID2, ID4, IGFBP3, IL1B, IL6, IL11, IL24, IL32, MAPK8IP2, MSX1, MX1, MRGPRX3, MSX2, NOS3, NPR1, PLCB2, PPP2R2C, PTGES, PTHLH, RAPGEF3, RGS16, SH2D2A, SPHK1, SULT2B1, TBXA2R, TGFA	0.876782
	Evading immune destruction	gsea_hallmarks.gmt	12/749	0.0566738	0.0708423	1.80614	5.18442	CSF2, CXCL1, CXCL2, CXCL3, IL1B, IL6, PLCB2, NCF2, RAPGEF3, SERPINB2, SPHK1, TNFAIP3	1.12652
	Sustained angiogenesis	gsea_hallmarks.gmt	21/796	2.33933e-05	0.000233933	3.1611	33.707	CSF2, CSF3, CXCL1, CXCL2, CXCL3, CXCL8, ECM1, FZD8, FZD9, IL1B, IL6, IL11, IL24, MMP1, NOS3, PLCB2, RAPGEF3, SH2D2A, SPHK1, TBXA2R, TGFA	1.85501
	Tissue invasion and metastasis	gsea_hallmarks.gmt	35/2318	0.00356697	0.0118899	1.78513	10.0611	CALML5, CARMIL2, DUSP2, DUSP4, DUSP5, FOSL1, FOXF2, FST, FZD8, FZD9, HES5, ID1, ID2, ID4, IL1B, IL24, IL32, KRT6A, MAPK8IP2, MMP1, MMP3, MSX1, MSX2, MUC16, NOS3, PLCB2, RAPGEF3, PPP2R2C, SERPINB2, SH2D2A, SNAI1, SPHK1, TBXA2R, TGFA, TNFAIP3	1.06168
	Tumor-promoting inflammation	gsea_hallmarks.gmt	13/769	0.0337493	0.054531	1.91352	6.48454	CSF2, CXCL1, CXCL2, CXCL3, IL1B, IL6, MMP3, NCF2, NFAIP3, NOS3, PLCB2, RAPGEF3, TBXA2R	1.18866
	Resisting cell death	gsea_hallmarks.gmt	29/1941	0.00966553	0.0198414	1.72872	8.01984	BIK, CSF2, CSF3, CXCL1, CXCL2, CXCL3, DHRS2, FST, ID1, ID2, ID4, IF16, IGFBP3, IL1B, IL6, IL11, IL24, MAPK8IP2, MMP3, MSX1, MSX2, NOS3, PLCB2, PPP2R2C, SERPINB2, SH2D2A, SPHK1, TGFA, TNFAIP3	1.05054
	Reprogramming energy metabolism	gsea_hallmarks.gmt	5/740	0.844364	0.938182	0.756984	0.12806	CALML5, IL6, PLCB2, PPP2R2C, SLC16A2	0.475092
	Replicative immortality	gsea_hallmarks.gmt	15/547	0.000247847	0.00123923	3.21975	26.7326	CSF3, CXCL3, FST, FDZ8, FDZ9, FOSB, FOSL1, FST, ID1, ID2, ID4, IGFBP3, IL6, NOS3, PLCB2, SPHK1	1.92816
Control DN (n = 443)	Sustaining proliferative signals	gsea_hallmarks.gmt	106/3574	0.498641	0.712344	1.0089	0.702059	ACTN1, ADRA1D, ADRA2C, ANGPTL4, AOX1, APC2, BCAR3, BCL2L1, BDKRB1, BMP2, BMP6, CACNA1A, CARD11, CCN2, CDC20, CEACAM1, CSF3, CSNK1E, CXCL1, CXCL2, CXCL8, DKK1, DLC1, DLL4, DUSP2, DUSP4, DUSP5, DUSP6, DUSP7, ECM1, EPHA2, ETS1, FAM83A, FGF5, FGFBP1, FLNB, FOSL1, FST, FZD8, FZD9, GNA15, GPR3, GPRC5A, GREM1, GRK5, HBEGF, HES5, HGS, HSPA6, HSPA8, HTR7, ID1, ID4, IL13RA2, IL1A, IL1B, IL32, IKZF3, INHBA,…	0.910297
	Genome inestability	gsea_hallmarks.gmt	7/747	0.999966	0.999966	0.320613	1.10279e-05	BCL2L1, CDC20, CSNK1E, MYC, POLM, THBS1, TNFRSF10A	0.287613
	Evading growth suppressors	gsea_hallmarks.gmt	93/3288	0.701771	0.877213	0.948547	0.335926	ADRA1D, ADRA2C, ALOX15B, APC2, BCAR3, BCL2L1, BDKRB1, BMP2, BMP6, CARD11, CCDC85B, CCN2, CDA, CDH11, CEACAM1, CHD5, CSF3, CSNK1E, CXCL1, CXCL2, CXCL8, CYP24A1, CYP27B1, DHRS2, DLC1, DLL4, ECM1, EPHA2, ETS1, FAM83A, FGF5, FGFBP1, FLNB, FOSL1, FSCN1, FST, FZD8, FZD9, GAL, GNA15, GPR3, GPRC5A, GREM1, GRK5, HBEGF, HGS, HMGA2, HTR7, ID1, ID4, IL1A, IL1B, IL32, INHBA, IRAK2, JUN, MAPKAPK3, MAP3K9, MRGP…	0.868126
	Evading immune destruction	gsea_hallmarks.gmt	29/749	0.0827718	0.137953	1.36685	3.40574	ACTN1, BDKRB1, CARD11, CXCL1,CXCL2, CXCL3, EPHA2, F3, GNA15, GRK5, IL1A, IL1B, IKZF3, JUN, MYC, NCF2, NFKBIZ, ORAI1, PLAUR, PLCB2, POLR3H, PREX1, PXN, RAPGEF3, SERPINB2, SPHK1, TICAM1, TNFAIP3, TNFRSF10A	1.18836
	Sustained angiogenesis	gsea_hallmarks.gmt	42/796	0.00019223	0.0019223	1.93657	16.5709	ANGPTL4, ARHGDIA, BMP2, CSF3, CXCL1, CXCL2, CXCL3, CXCL8, ECM1, EPHA2, ETS1, F3, FLNB, FZD8, FZD9, GNA15, GREM1, HBEGF, HK2, HMGA2, IL1A, IL1B, INHBA, MAPKAPK3, MYC, PGF, PLAUR, PLCB2, PXN, RAPGEF3, SH2D2A, SPHK1, TFAP4, TGFA, THBS1, TNFRSF12A, TNFRSF6B, TNFRSF10A, TWIST2, VEGFC, WNT10B, ZFP36L1	1.61945
	Tissue invasion and metastasis	gsea_hallmarks.gmt	87/2318	0.00949098	0.0316366	1.35579	6.31446	ACTN1, AMIGO2, APC2, ARHGDIA, BCL2L1, BDKRB1, BMP2, BMP6, CACNA1A, CARMIL2, CCN2, CDH11, CEACAM1, COL13A1, CORO1A, CSNK1E, DSCAM, DKK1, DUSP2, DUSP4, DUSP5, DUSP6, DUSP7, EPHA2, ETS1, ETV4, FGF5, FLNB, FNGF, FOSL1, FOXF2, FST, FSCN1, FZD8, FZD9, GNA15, HBEGF, HES5, HMGA2, HSPA8, HSPA6, HTR7, ID1, ID4, IER2, IGSF9B, INHBA, IL1A, IL1B, IL32, JUN, KRT6A, LAMC2, LOXL3, MAP3K9, MAPKAPK3, MMP3, MSX1, M…	1.15196
	Tumor-promoting inflammation	gsea_hallmarks.gmt	30/769	0.0730428	0.137953	1.37831	3.60664	ACTN1, ANTXR2, ARHGDIA, BCL2L1, CARD11, CORO1A, CXCL1, CXCL2, CXCL3, GNA15, GRK5, HGS, IL1A, IL1B, JUN, MMP3, NCF2, NFKBIZ, NRCAM, PLCB2, PREX1, PXN, RAPGEF3, TGM2, THBS1, TICAM1, TNFAIP3, TUBB3, TUBAL3, VEGFC	1.19737
	Resisting cell death	gsea_hallmarks.gmt	69/1941	0.0568037	0.137953	1.25724	3.60596	AMIGO2, ANGPTL4, ANTXR2, ARHGDIA, ATAD3A, BCL2L1, BMP2, BMP6, CARD11, CASP14, CDH11, CSF3, CSNK1E, CTU2, CXCL1, CXCL2, CXCL3, DHRS2, DKK1, EGR3, EPHA2, FCMR, FGF5, FI6, FST, GREM1, GRK5, HBEGF, HMGA2, ICTU1, ID1, ID4, IER3, IKZF3, IL1A, IL1B, INHBA, JUN, LAMC2, MAP3K9, MAPKAPK3, MSX1, MMP3, MYC, NOG, NFKBIZ, NGF, NTSR1, PGF, PLAUR, PLCB2, PLK3, PIK3AP1, PPIF, PRR5, PXN SERPINB2, SH2D2A, SOX9, SPH…	1.09108
	Reprogramming energy metabolism	gsea_hallmarks.gmt	11/740	0.997091	0.999966	0.504036	0.0014682	ADAM8, ASB1, CSNK1E, HK2, HKDC1, IER3, MGLL, MYC, PLCB2, PLK3, ZFP36L1	0.456239
	Replicative immortality	gsea_hallmarks.gmt	30/547	0.000864595	0.00432297	2.00123	14.1152	APC2, ANGPTL4, BMP2, BMP6, CSNK1E, CSF3, CTU1, CTU2, CXCL3, DKK1, ETS1, F3, FOSL1, FST, FZD8, FZD9, ID1, ID4, INHBA, JUN, LHX5, MYC, NGF, NOG, PGF, PLCB2, SPHK1, THBS1, TYMP, WNT10B	1.68332
Endo180-KO UP (n = 552)	Sustaining proliferative signals	gsea_hallmarks.gmt	84/3574	0.999999	1	0.58045	3.0863e-07	AKAP6, AKAP9, ALCAM, AMOT, ANK1, ANK3, APPL1, ARAP2, ARHGAP28, ARHGAP5, ATM, BMP7, C5AR1, CACNB4, CAMK2B, CAMK4, CCPG1, CD164, CDK1, CDKL2, COL6A6, COPS2, DAAM1, DEK, DEPDC1, EPS8, FAM13A, FGF1, FZD6, GAB1, GAS1, GHR, GNG2, IL6R, IL6ST, INPP5D, ITGAV, ITGB3BP, ITGB6, ITGB8, KIF20B, KIT, LEPR, LGR6, LIFR, LPAR6, MAP2K6, OLFML2A, P2RX6, P2RX7, PDE4D, PDE5A, PIK3R3, PLCB1, PLCE1, PIK3R1, PPP2R3A, PR…	0.807931
	Genome inestability	gsea_hallmarks.gmt	33/747	0.132714	0.442379	1.2674	2.55958	ABRAXAS1, ALDH3A1, ATM, ATRX, ATXN3, BRCA2, CDK1, CUL4B, CYP1B1, ETAA1, HLTF, , POLK, POLI, PTEN, RRM2B, SESN1, SESN3, SLF1, SMC2, SMC5, STAG2, TEX15, TNFSF10, TOP2A, TP73, TREX2, UFL1, UGT1A1, UGT1A3, UGT1A6, UGT1A7, XRCC4, ZMAT3	1.5186
	Evading growth suppressors	gsea_hallmarks.gmt	74/3288	1	1	0.557494	1.42768e-07	AKAP9, ALCAM, AMOT, ANK1, ANK3, APPL1, ARAP2, ARHGAP28, ARHGAP5, ATM, BMF, BMP7, C5AR1, CACNB4, CAMK2B, CAMK4, CD164, CDK1, CDK19, CDKL2, COPS2, CYP1B1, DEK, DEPDC1, EAF2, FAM13A, FAT4, FGF1, FZD6, GAB1, GNG2, HPGD, IFIT3, IL6ST, IL6R, INPP5D, ITGB3BP, KIT, LGR6, LPAR6, MAP2K6, OLFML2A, P2RX6, P2RX7, PDE4D, PDE5A, PIK3R1, PIK3R3, PLCB1, PLCE1, PRKAA2, PRKACB, PRKG2, PTEN, RASSF9, REL, RGS5, SOS1,…	0.773659
	Evading immune destruction	gsea_hallmarks.gmt	23/749	0.816801	1	0.856771	0.173377	ARHGAP5, C5, C5AR1, CAMK2B, CFH, CLDN2, DISP1, GNG2, IL6ST, INPP5D, MAP2K6, PIK3R1, PIK3R3, PLCB1, PRKACB, PROS1, PTEN, TFPI, TLR3, TMED7, TNFSF10, SOS1, VAV3	1.05559
	Sustained angiogenesis	gsea_hallmarks.gmt	38/796	0.0472432	0.236216	1.38125	4.21621	AMOT, ANK1, ANK3, BMP7, C5, C5AR1, CAMK2B, CYP1B1, FGF1, FZD6, GAB1, GHR, GNG2, HOXA13, IL6R, IL6ST, ITGAV, ITGB8, KIT, LEPR, LIFR, NINJ1, PBX1, PIK3R1, PIK3R3, PLCB1, PLCE1, PRKACB,SOS1, TGFB2, TLR3, TNFSF10, VAV3, WNT3A, WNT4, WNT5A, WNT5B, WNT6	1.64104
	Tissue invasion and metastasis	gsea_hallmarks.gmt	66/2318	0.98773	1	0.757937	0.00935716	ADAM22, ADAM32, ALCAM, ANK1, ANK3, ANOS1, ARHGAP5, ATM, BMP7, CACNB4, CADM1, CADM2, CAMK2B, CDK1, CD164, CLDN2, CNTNAP2, COL6A6, COL8A1, CXADR, CYP1B1, DAAM1, EDIL3, EMB, EPHA7, EPS8, EXOC6, FAT4, FGF1, FZD6, GAB1, GNG2, HMMR, ITGAV, ITGB3BP, ITGB6, ITGB8, KIT, LIFR, LOX, MAP2K6, MEGF9, NINJ1, PIK3R1, PIK3R3, PLCB1, PLCE1, PRKG2, PRKACB, PTEN, REL, SDK2, SERPINF1, SOS1, SPOCK1, SSX2IP, TBL1XR1, T…	0.978769
	Tumor-promoting inflammation	gsea_hallmarks.gmt	20/769	0.954531	1	0.719087	0.0334629	ALCAM, ARHGAP5, ATM, CADM1, CLDN2, CNTNAP2, GNG2, IL6ST, ISOS1, ITGAV, ITGB8, LAMP2, MAP2K6, NPP5D, PIK3R3, PIK3R1, PLCB1, PRKACB, TMED7, VAV3	0.894033
	Resisting cell death	gsea_hallmarks.gmt	51/1941	0.995852	1	0.698087	0.00290147	ATM, BMP7, BRCA2, CAMK2B, CD164, CDK1, COL6A6, EPS8, FBXO32, FGF1, GAB1, GFB2, GHR, GNG2, HMMR, IFIT3, IL6R, IL6ST, INPP5D, ITGAV, ITGB6, ITGB8, KIT, LAMP2, LEPR, LIFR, LPAR6, MAP2K6, PBX1, PIK3R1, PIK3R3, PLAG1, PLCB1, PPP2R3A, PRKAA2, PRKACB, PSAPL1, PTEN, REL, RRM2B, SESN1, SESN3, SLC2A4, SOS1, SYCP2, TNFSF10, TP73, TZMAT3, UFL1, WNT5A, ZFYVE16	0.903222
	Reprogramming energy metabolism	gsea_hallmarks.gmt	28/740	0.424138	1	1.07089	0.918496	AGL, ALDH3A1, AMT, ARRDC3, ATM, ATP7A, BMP7, CAMK2B, EGLN3, FBXO32, KIT, LEPR, NDUFA5, PBX1, PDK4, PIK3R3, PIK3R1, PLCB1, PPP2R3A, PRKAA2, PRKACB, PTEN, RORA, SLC16A14, SLC2A4, SOS1, TGFB2, TNFSF10	1.3007
	Replicative immortality	gsea_hallmarks.gmt	33/547	0.00274615	0.0274615	1.78568	10.5311	AMOT, ATM, ATRX, BMP7, BRCA2, CAMK2B, CDK1, CDK19, DAAM1, EDIL3, FGF1, FZD6, IL6ST, LIFR, MAP2K6, PCGF5, PIK3R1, PIK3R3, PLCB1, PRKACB, PTEN, SERPINF1, SMC5, SOS1, STAG2, TBL1XR1, TGFB2, WNT3A, WNT4, WNT5A, WNT5B, WNT6, ZFYVE16	2.07385
Hallmarks and genes marked in bold are significantly enriched (p < 0.05)
