# Supplementary material for: Endo180 and basement membrane stiffness induce OXPHOS and neoplasia in aging prostate epithelia
Source: Research Square preprint supplement (doi:10.21203/rs.3.rs-4837876/v1), 2024-09-19
Supplement: Supplementary file 5 [file 6bf94c1032c54e49191539d2.xlsx]

## Sheet: UP (stiff vs native)
Supplementary data 7. Upregulated terms in Ctrl-acini in stiff-BM versus native-BM
Source	Term name	Term ID	Adjusted p value	Negative log10 adjusted p value	Term size	Query size	Intersection size	Effective domain size	Intersections
GO:MF	DNA-binding transcription factor activity, RNA polymerase II-specific	GO:0000981	1.53822e-08	7.81298	1359	818	107	20166	TP73,ZNF20,MAF,ZNF117,SOX2,CSRNP3,MAFB,SOX6,FOXO6,POU2F3,ZNF546,FOXN1,ZNF396,ZBTB16,ZNF596,TFCP2L1,ZNF43,ZNF606,ZNF273,PBX1,ZBTB41,ZNF345,CREBRF,LMX1B,ZNF658,ZNF429,STOX1,RORA,ZNF713,ZNF654,ZNF736,ZSCAN31,ZNF138,ZNF519,ZSCAN23,ZFP14,NR1D2,ZNF708,HOXD9,ZNF415,ZNF467,ZNF141,ZNF148,ZNF780A,MYB,ZNF225,BHLHE41,ZNF484,GTF2IRD2,SALL2,DMRTA1,STOX2,ZNF248,ZNF292,ZNF107,KLF15,ZNF420,ZNF354C,ZNF518A,ZNF181,…
	DNA-binding transcription factor activity	GO:0003700	3.34935e-08	7.47504	1413	818	109	20166	TP73,ZNF20,MAF,ZNF117,SOX2,CSRNP3,MAFB,SOX6,FOXO6,POU2F3,ZNF546,IKZF2,FOXN1,ZNF396,ZBTB16,ZNF596,TFCP2L1,ZNF43,ZNF606,ZNF273,PBX1,ZBTB41,ZNF345,CREBRF,LMX1B,ZNF658,ZNF429,STOX1,RORA,ZNF713,ZNF763,ZNF654,ZNF736,ZSCAN31,ZNF138,ZNF519,ZSCAN23,ZFP14,NR1D2,ZNF708,HOXD9,ZNF415,ZNF467,ZNF141,ZNF148,ZNF780A,MYB,ZNF225,BHLHE41,ZNF484,GTF2IRD2,SALL2,DMRTA1,STOX2,ZNF248,ZNF292,ZNF107,KLF15,ZNF420,ZNF354C,ZN…
	RNA polymerase II transcription regulatory region sequence-specific DNA binding	GO:0000977	4.81996e-07	6.31696	1405	818	105	20166	TP73,ZNF20,MAF,ZNF117,SOX2,MAFB,SOX6,FOXO6,POU2F3,ZNF546,IKZF2,ZNF396,ZBTB16,ZNF596,TFCP2L1,ZNF43,ZNF606,ZNF273,PBX1,ZBTB41,ZNF345,CREBRF,LMX1B,ZNF658,ZNF429,STOX1,RORA,ZNF713,ZNF763,ZNF736,ZSCAN31,ZNF138,ZNF519,ZSCAN23,ZFP14,NR1D2,ZNF708,HOXD9,ZNF415,ZNF467,ZNF141,KAT2B,ZNF148,ZNF780A,MYB,ZNF225,BHLHE41,ZNF484,SALL2,DMRTA1,STOX2,ZNF248,ZNF107,KLF15,ZNF420,ZNF354C,ZNF518A,ZNF181,DLX3,ZNF461,REL,Z…
	transcription cis-regulatory region binding	GO:0000976	5.30196e-07	6.27556	1500	808	109	20166	TP73,ZNF20,MAF,ZNF117,SOX2,MAFB,SOX6,FOXO6,POU2F3,ZNF546,IKZF2,FOXN1,ZNF396,ZBTB16,ZNF596,TFCP2L1,ZNF43,ZNF606,ZNF273,PBX1,ZBTB41,ZNF345,CREBRF,LMX1B,ZNF658,ZNF429,STOX1,RORA,ZNF713,ZNF763,ZNF736,ZSCAN31,ZNF138,ZNF519,ZSCAN23,ZFP14,NR1D2,ZNF708,HOXD9,ZNF415,ZNF467,ZNF141,KAT2B,ZNF148,ZNF780A,MYB,ZNF225,BHLHE41,ZNF484,SALL2,DMRTA1,STOX2,ZNF248,ZNF107,KLF15,ZNF420,ZNF354C,ZNF518A,ZNF181,DLX3,ZNF461…
	transcription regulatory region nucleic acid binding	GO:0001067	5.71968e-07	6.24263	1502	808	109	20166	TP73,ZNF20,MAF,ZNF117,SOX2,MAFB,SOX6,FOXO6,POU2F3,ZNF546,IKZF2,FOXN1,ZNF396,ZBTB16,ZNF596,TFCP2L1,ZNF43,ZNF606,ZNF273,PBX1,ZBTB41,ZNF345,CREBRF,LMX1B,ZNF658,ZNF429,STOX1,RORA,ZNF713,ZNF763,ZNF736,ZSCAN31,ZNF138,ZNF519,ZSCAN23,ZFP14,NR1D2,ZNF708,HOXD9,ZNF415,ZNF467,ZNF141,KAT2B,ZNF148,ZNF780A,MYB,ZNF225,BHLHE41,ZNF484,SALL2,DMRTA1,STOX2,ZNF248,ZNF107,KLF15,ZNF420,ZNF354C,ZNF518A,ZNF181,DLX3,ZNF461…
	sequence-specific double-stranded DNA binding	GO:1990837	2.23289e-06	5.65113	1558	808	110	20166	TP73,ZNF20,MAF,ZNF117,SOX2,MAFB,SOX6,FOXO6,POU2F3,ZNF546,IKZF2,FOXN1,ZNF396,ZBTB16,ZNF596,TFCP2L1,ZNF43,ZNF606,ZNF273,PBX1,ZBTB41,ZNF345,CREBRF,LMX1B,ZNF658,ZNF429,STOX1,RORA,ZNF713,ZNF763,ZNF736,ZSCAN31,ZNF138,ZNF519,ZSCAN23,ZFP14,NR1D2,ZNF708,HOXD9,ZNF415,ZNF467,ZNF141,KAT2B,ZNF148,ZNF780A,MYB,ZNF225,BHLHE41,ZNF484,SALL2,DMRTA1,STOX2,ZNF248,ZNF107,KLF15,ZNF420,ZNF354C,ZNF518A,ZNF181,DLX3,ZNF461…
	double-stranded DNA binding	GO:0003690	4.96383e-06	5.30418	1658	808	114	20166	TP73,ZNF20,MAF,ZNF117,SOX2,MAFB,SOX6,FOXO6,POU2F3,ZNF546,IKZF2,FOXN1,ZNF396,ZBTB16,ZNF596,TFCP2L1,ZNF43,ZNF606,ZNF273,PBX1,ZBTB41,ZNF345,CREBRF,LMX1B,ZNF658,ZNF429,STOX1,RORA,ZNF713,ZNF763,DDX60,ZNF736,ZSCAN31,ZNF138,ZNF519,ZSCAN23,ZFP14,NR1D2,ZNF708,HOXD9,ZNF415,ZNF467,ZNF141,KAT2B,ZNF148,ZNF780A,MYB,ZNF225,BHLHE41,ZNF484,SALL2,DMRTA1,STOX2,ZNF248,ZNF107,KLF15,ZNF420,ZNF354C,ZNF518A,ZNF181,DLX3,…
	transcription regulator activity	GO:0140110	5.2343e-06	5.28114	1925	820	129	20166	TP73,ZNF20,MAF,ZNF117,SOX2,CSRNP3,MAFB,SOX6,WNT4,BEND6,FOXO6,POU2F3,ZNF546,IKZF2,FOXN1,ZNF396,ZBTB16,ZNF596,TFCP2L1,ZNF43,ZNF606,ZNF273,PBX1,ZBTB41,ZNF345,CREBRF,LMX1B,ZNF658,ZNF429,WNT3A,STOX1,RORA,ZNF713,ZNF763,ZNF654,ZNF736,NCOA7,ZSCAN31,ZNF138,ZNF519,ZSCAN23,ZFP14,NR1D2,ZNF708,HOXD9,ZNF415,ZNF467,ZNF141,SCAI,KAT2B,ZNF148,ZNF780A,MYB,ZNF225,BHLHE41,ZNF484,GTF2IRD2,SALL2,DMRTA1,STOX2,ZNF248,ZNF…
	sequence-specific DNA binding	GO:0043565	5.67884e-06	5.24574	1662	808	114	20166	TP73,ZNF20,MAF,ZNF117,SOX2,CSRNP3,MAFB,SOX6,FOXO6,POU2F3,ZNF546,IKZF2,FOXN1,ZNF396,ZBTB16,ZNF596,CXXC5,TFCP2L1,ZNF43,ZNF606,ZNF273,PBX1,ZBTB41,ZNF345,CREBRF,LMX1B,ZNF658,ZNF429,STOX1,RORA,ZNF713,ZNF763,ZNF736,THAP9,ZSCAN31,ZNF138,ZNF519,ZSCAN23,ZFP14,NR1D2,ZNF708,HOXD9,ZNF415,ZNF467,ZNF141,KAT2B,ZNF148,ZNF780A,MYB,ZNF225,BHLHE41,ZNF484,SALL2,DMRTA1,STOX2,ZNF248,ZNF107,KLF15,ZNF420,ZNF354C,ZNF518A…
	DNA binding	GO:0003677	1.71708e-05	4.76521	2507	820	156	20166	TP73,SERPINA3,ZNF20,MAF,ZNF117,SOX2,CSRNP3,MAFB,SOX6,BEND6,FOXO6,POU2F3,ZNF546,IKZF2,FOXN1,ZNF396,ZBTB16,ZNF596,CXXC5,TFCP2L1,ZNF43,ZNF606,ZNF273,PBX1,ZBTB41,ZNF345,CREBRF,LMX1B,ZNF658,ZNF429,STOX1,RORA,ZNF713,ZNF763,ZNF654,DDX60,ZNF736,THAP9,ZSCAN31,SSBP2,ZNF138,ZNF519,ZSCAN23,ZFP14,NR1D2,ZNF708,HOXD9,ZNF415,ZNF467,ZNF141,KAT2B,THAP2,ZNF148,XNDC1N,MLLT3,ZNF780A,MYB,ZNF225,BHLHE41,ZNF484,GTF2IRD2…
	RNA polymerase II cis-regulatory region sequence-specific DNA binding	GO:0000978	8.06336e-05	4.09348	1189	779	83	20166	TP73,MAF,ZNF117,SOX2,MAFB,SOX6,FOXO6,POU2F3,ZNF546,IKZF2,ZNF396,ZBTB16,TFCP2L1,ZNF43,ZNF606,ZNF273,PBX1,ZBTB41,ZNF345,ZNF658,ZNF429,RORA,ZNF713,ZNF763,ZNF736,ZSCAN31,ZNF138,ZNF519,ZSCAN23,ZFP14,NR1D2,ZNF708,HOXD9,ZNF415,ZNF467,ZNF141,ZNF148,ZNF780A,MYB,ZNF225,BHLHE41,ZNF484,SALL2,DMRTA1,ZNF107,KLF15,ZNF420,ZNF354C,ZNF181,DLX3,ZNF461,REL,ZNF260,ZNF879,MLXIPL,NCOA2,ZNF571,ZNF678,ZNF214,ZNF184,ZNF64…
	cis-regulatory region sequence-specific DNA binding	GO:0000987	8.22282e-05	4.08498	1209	779	84	20166	TP73,MAF,ZNF117,SOX2,MAFB,SOX6,FOXO6,POU2F3,ZNF546,IKZF2,ZNF396,ZBTB16,TFCP2L1,ZNF43,ZNF606,ZNF273,PBX1,ZBTB41,ZNF345,ZNF658,ZNF429,RORA,ZNF713,ZNF763,ZNF736,ZSCAN31,ZNF138,ZNF519,ZSCAN23,ZFP14,NR1D2,ZNF708,HOXD9,ZNF415,ZNF467,ZNF141,ZNF148,ZNF780A,MYB,ZNF225,BHLHE41,ZNF484,SALL2,DMRTA1,ZNF107,KLF15,ZNF420,ZNF354C,ZNF181,DLX3,ZNF461,REL,ZNF260,ZNF879,MLXIPL,NCOA2,ZNF571,ZNF678,ZNF214,ZNF184,ZNF64…
	NADH dehydrogenase (ubiquinone) activity	GO:0008137	0.00609725	2.21487	41	369	7	20166	MT-ND4L,MT-ND6,MT-ND5,MT-ND2,MT-ND1,MT-ND4,MT-ND3
	oxidoreductase activity, acting on NAD(P)H, quinone or similar compound as acceptor	GO:0016655	0.00628872	2.20144	57	369	8	20166	MT-ND4L,MT-ND6,MT-ND5,MT-ND2,MT-ND1,MT-ND4,MT-ND3, AKR1C3
	NADH dehydrogenase (quinone) activity	GO:0050136	0.0072026	2.14251	42	369	7	20166	MT-ND4L,MT-ND6,MT-ND5,MT-ND2,MT-ND1,MT-ND4,MT-ND3
	NADH dehydrogenase activity	GO:0003954	0.00991425	2.00374	44	369	7	20166	MT-ND4L,MT-ND6,MT-ND5,MT-ND2,MT-ND1,MT-ND4,MT-ND3
	NAD(P)H dehydrogenase (quinone) activity	GO:0003955	0.0115576	1.93713	45	369	7	20166	MT-ND4L,MT-ND6,MT-ND5,MT-ND2,MT-ND1,MT-ND4,MT-ND3
	oxidoreductase activity, acting on NAD(P)H	GO:0016651	0.0238468	1.62257	88	369	9	20166	MT-ND4L,MT-ND6,MT-ND5,MT-ND2,MT-ND1,MT-ND4,AKR1C3,FMO5,MT-ND3
GO:BP	regulation of transcription by RNA polymerase II	GO:0006357	2.87544e-06	5.5413	2574	820	159	21092	FGF1,LMO1,TP73,ZNF20,MAF,ZNF117,SOX2,CSRNP3,MAFB,SOX6,TRPV4,FOXO6,POU2F3,ZNF546,IKZF2,FOXN1,TLR3,ZNF396,ZBTB16,ZNF596,CXXC5,TFCP2L1,ZNF43,ZNF606,ZNF273,USP2,TSC22D3,PBX1,ZBTB41,ZNF345,CREBRF,LMX1B,ZNF658,ZNF429,WNT3A,ZNF608,FRK,STOX1,RORA,ZNF713,ZNF763,ZNF654,ZNF736,NCOA7,RGMA,WNT5A,ZSCAN31,SSBP2,ZNF138,ZNF519,ZSCAN23,ZFP14,NR1D2,ZNF708,HOXD9,ZNF415,ZNF467,ZNF141,SERPINF2,NPNT,KAT2B,ZNF148,MLLT3,…
	transcription by RNA polymerase II	GO:0006366	2.51672e-05	4.59917	2676	820	160	21092	FGF1,LMO1,TP73,ZNF20,MAF,ZNF117,SOX2,CSRNP3,MAFB,SOX6,TRPV4,FOXO6,POU2F3,ZNF546,IKZF2,FOXN1,TLR3,ZNF396,ZBTB16,ZNF596,CXXC5,TFCP2L1,ZNF43,ZNF606,ZNF273,USP2,TSC22D3,PBX1,ZBTB41,ZNF345,CREBRF,LMX1B,ZNF658,ZNF429,WNT3A,ZNF608,C5AR1,FRK,STOX1,RORA,ZNF713,ZNF763,ZNF654,ZNF736,NCOA7,RGMA,WNT5A,ZSCAN31,SSBP2,ZNF138,ZNF519,ZSCAN23,ZFP14,NR1D2,ZNF708,HOXD9,ZNF415,ZNF467,ZNF141,SERPINF2,NPNT,KAT2B,ZNF148,…
	DNA integration	GO:0015074	0.00139527	2.85534	10	818	6	21092	THAP9,NYNRIN,TMEM161B,KRBA2,SCAND3,ZNF91
	negative regulation of TORC1 signaling	GO:1904262	0.00143091	2.84439	25	665	8	21092	H7C471,SESN3,BMT2,DEPTOR,ATM,SESN1,CASTOR1,RNF152
	connective tissue development	GO:0061448	0.00292619	2.5337	274	690	26	21092	MAF,SOX6,AXIN2,GHR,TRPV4,SULF1,ZBTB16,CHADL,CTSK,WNT5B,ARRDC3,ATP7A,LOX,BGN,WNT5A,ITGB8,PRKG2,IL6R,BMP7,NCOA2,LNPK,BMPR2,ARID5B,TBL1XR1,ATF2,FGFR3
	cartilage development	GO:0051216	0.0029557	2.52934	204	342	15	21092	MAF,SOX6,AXIN2,GHR,TRPV4,SULF1,ZBTB16,CHADL,CTSK,WNT5B,ATP7A,BGN,WNT5A,ITGB8,PRKG2
	ciliary neurotrophic factor-mediated signaling pathway	GO:0070120	0.00370766	2.4309	5	508	4	21092	LIFR,IL6R,CNTF,IL6ST
	proton motive force-driven mitochondrial ATP synthesis	GO:0042776	0.00501512	2.29972	67	270	8	21092	MT-ATP8,MT-ND4L,MT-ND6,MT-ND5,MT-ATP6,MT-ND2,MT-ND1,MT-ND4
	proton motive force-driven ATP synthesis	GO:0015986	0.0144895	1.83895	77	270	8	21092	MT-ATP8,MT-ND4L,MT-ND6,MT-ND5,MT-ATP6,MT-ND2,MT-ND1,MT-ND4
	limb development	GO:0060173	0.0165578	1.781	181	815	21	21092	FOXN1,ZBTB16,PBX1,SLC7A11,SEMA3C,WNT5A,TGFB2,HOXD9,ZNF141,KAT2B,TBC1D32,BMP7,LNPK,BMPR2,INTU,ATRX,BCL2L11,FZD6,HOXD10,CPLANE1,NOTCH1
	appendage development	GO:0048736	0.0165578	1.781	181	815	21	21092	FOXN1,ZBTB16,PBX1,SLC7A11,SEMA3C,WNT5A,TGFB2,HOXD9,ZNF141,KAT2B,TBC1D32,BMP7,LNPK,BMPR2,INTU,ATRX,BCL2L11,FZD6,HOXD10,CPLANE1,NOTCH1
	regulation of developmental process	GO:0050793	0.0172199	1.76397	2499	416	80	21092	FGF1,APCDD1,TP73,IGFBP5,AGR2,MAF,EPHA7,SOX2,KLHL41,MAFB,SOX6,AXIN2,MAP2,WNT4,TP53INP1,GHR,TRPV4,CYP1B1,BEND6,FOXO6,SEMA6D,FOXN1,TENT5C,SULF1,TLR3,AMOT,ZBTB16,A0A2R8YFF1,LFNG,TENT5A,PDE5A,CHADL,CTSK,KIT,TPPP,GPNMB,ABCA5,PBX1,GRIN3A,WNT5B,C210rf91,WNT3A,C5AR1,WNT6,STOX1,CAMK2B,RORA,CXADR,C5,LOX,GPR68,GBP1,PLCB1,SEMA3C,FAXDC2,RGMA,TMEM106B,PALMD,WNT5A,PRTG,ITGB8,NR1D2,PRKG2,ATP10A,TGFB2,NINJ1,P2PX7,…
	negative regulation of nucleobase-containing compound metabolic process	GO:0045934	0.0240762	1.61841	1554	818	94	21092	LMO1,ZNF20,MAF,SOX2,MAFB,SOX6,AXIN2,WNT4,TRPV4,BEND6,SAMD13,TENT5C,ZNF396,ZBTB16,ZNF596,CXXC5,TFCP2L1,TENT5A,USP2,ZNF345,CREBRF,ZNF658,CDKN1C,ZNF608,FRK,CRYAB,PLCB1,WNT5A,NR1D2,MEIOC,HOXD9,ZC3H6,ZNF141,SCAI,KAT2B,ZNF148,MYB,BHLHE41,TRIM6,SALL2,RPS6KA5,ZNF248,ATM,FNIP1,KLHL15,DCP2,BMP7,MLXIPL,NCOA2,DEPDC1,TRIM22,ZBTB10,GCLC,RADX,ZNF891,MIER3,ZNF10,BMPR2,POT1,ZNF12,ZNF436,ZNF254,ZNF431,RCOR3,PARP14…
	negative regulation of developmental process	GO:0051093	0.0280614	1.55189	929	274	29	21092	TP73,IGFBP5,EPHA7,SOX2,MAFB,SOX6,AXIN2,MAP2,WNT4,TP53INP1,TRPV4,SEMA6D,TENT5C,SULF1,TLR3,AMOT,ZBTB16,CHADL,CTSK,KIT,ABCA5,PBX1,GRIN3A,WNT3A,RORA,CXADR,GPR68,GBP1,SEMA3C
	positive regulation of MAPK cascade	GO:0043410	0.029119	1.53582	483	497	28	21092	FGF1,MAP2K6,TP73,SOX2,GHR,TRPV4,TLR3,PELI2,PDE5A,KIT,GPNMB,C5AR1,GADD45G,PLCB1,FZD10,DUSP19,CSPG4,WNT5A,DNAJC27,TGFB2,P2PX7,SERPINF2,NPNT,PTEN,IL6R,PDGFC,ADRA2B,PJA2
	negative regulation of cell differentiation	GO:0045596	0.0311557	1.50646	682	413	31	21092	TP73,IGFBP5,EPHA7,SOX2,MAFB,SOX6,AXIN2,MAP2,WNT4,TP53INP1,TRPV4,SEMA6D,TENT5C,TLR3,ZBTB16,CHADL,ABCA5,PBX1,WNT3A,RORA,GPR68,GBP1,SEMA3C,WNT5A,PRTG,TGFB2,MYB,BHLHE41,CDKL3,PTEN,TRIM6
	skeletal system development	GO:0001501	0.0322457	1.49153	544	372	25	21092	MAP2K6,MAF,SOX6,AXIN2,GHR,TRPV4,SULF1,ZBTB16,CHADL,CTSK,KIT,LEPR,PBX1,WNT5B,ATP7A,LOX,GPR68,BGN,WNT5A,ITGB8,PRKG2,TGFB2,HOXD9,SPEF2,P2PX7
	regulation of cell size	GO:0008361	0.0346113	1.46078	185	407	14	21092	VAV3,EPHA7,MAP2,TRPV4,SEMA6D,AMOT,WNT3A,ATP7A,SEMA3C,WNT5A,DEPTOR,P2PX7,CDKL3,PTEN
	positive regulation of vascular endothelial growth factor production	GO:0010575	0.0364488	1.43832	28	245	5	21092	CYP1B1,SULF1,C5AR1,RORA,C5
	regulation of cartilage development	GO:0061035	0.0425735	1.37086	73	159	6	21092	MAF,SOX6,AXIN2,ZBTB16,CHADL,CTSK
	oxidative phosphorylation	GO:0006119	0.0436837	1.35968	146	270	10	21092	UQCRHL,MT-ATP8,MT-ND4L,MT-ND6,MT-ND5,ATP7A,MT-ATP6,MT-ND2,MT-ND1,MT-ND4
	vascular endothelial growth factor production	GO:0010573	0.0466955	1.33073	36	508	7	21092	CYP1B1,SULF1,C5AR1,RORA,C5,IL6R,IL6ST
	tube development	GO:0035295	0.0496806	1.30381	1076	417	42	21092	FGF1,TP73,IGFBP5,AGR2,VAV3,HPGD,EPHA7,WNT4,CYP1B1,FOXN1,SULF1,TLR3,AMOT,A0A2R8YFF1,KIT,LEPR,GPNMB,PBX1,WNT3A,C5AR1,WNT6,STOX1,RORA,ATP7A,SLC7A11,C5,LOX,SEMA3C,PIK3R3,RGMA,CSPG4,WNT5A,ITGB8,TGFB2,NINJ1,SERPINF2,VANGL2,NPNT,TBC1D32,PTEN,CYP1A1,SALL2
GO:CC	endoplasmic reticulum	GO:0005783	0.00105831	2.97539	2031	815	116	21690	TMT1A,IGFBP5,AGR2,ZDHHC11B,CLGN,ATP8A1,KCNJ2,REEP1,KLHL41,WNT4,GIMAP2,TRPV4,CYP1B1,FIBIN,CDNF,UGT1A7,SULF1,SLC51A,ALDH3A1,TLR3,RETREG1,CYP39A1,MGAT4A,UGT1A6,SLC27A2,RSAD2,MARCHF1,TFPI,GRIN3A,WNT5B,PCSK1,PGAP1,WNT3A,CLEC2D,WNT6,GRAMD1C,CAMK2B,ATP7A,TLCD4,SLC7A11,LYNX1,TMCC2,PPM1L,RNF128,SMIM14,FAXDC2,ERO1B,RGMA,TMTC3,TXNDC16,WNT5A,CYP4X1,DNAJB14,VPS13C,ATP10A,FMO5,PROS1,SPTSSB,IFIT2,SC5D,TRIQK,AGL…
	respiratory chain complex I	GO:0045271	0.0107116	1.97014	53	369	7	21690	MT-ND4L,MT-ND6,MT-ND5,MT-ND2,MT-ND1,MT-ND4,MT-ND3
	NADH dehydrogenase complex	GO:0030964	0.0107116	1.97014	53	369	7	21690	MT-ND4L,MT-ND6,MT-ND5,MT-ND2,MT-ND1,MT-ND4,MT-ND3
	mitochondrial respiratory chain complex I	GO:0005747	0.0107116	1.97014	53	369	7	21690	MT-ND4L,MT-ND6,MT-ND5,MT-ND2,MT-ND1,MT-ND4,MT-ND3
	transporter complex	GO:1990351	0.0144903	1.83892	418	597	27	21690	UQCRHL,ATP8A1,KCNJ2,CNTNAP2,SCNN1B,TRPV6,MT-ND4L,SCNN1G,SCN8A,MT-ND6,MT-ND5,GRIN3A,MT-ND2,MT-ND1,MT-ND4,CACNB2,ATP10A,MT-ND3,CACNB4,AKAP9,SCN4B,KCNAB1,PDE4D,MT-CYB,CACNA1G,EPS8,TMEM30A
	Golgi lumen	GO:0005796	0.0165573	1.78101	103	353	9	21690	WNT4,OGN,WNT5B,WNT3A,WNT6,BGN,CSPG4,WNT5A,PROS1
	cell surface	GO:0009986	0.0179474	1.746	966	527	44	21690	ITGA9,EPHB6,CNTNAP2,ADAM21,SCNN1B,WNT4,GHR,TRPV4,SEMA6D,SULF1,SCNN1G,AMOT,CTSK,KIT,LEPR,TFPI,WNT3A,CLEC2D,LIFR,WNT6,CRYAB,SLC7A11,BGN,FZD10,RGMA,CSPG4,WNT5A,ITGB8,CD58,P2PX7,SERPINF2,CD302,CD109,IL6R,ANOS1,HMMR,GP1BA,PDGFC,ADRA2B,ANK3,IL6ST,TMEM123,CEL,CLU
	extracellular matrix	GO:0031012	0.0232255	1.63403	565	454	27	21690	FGF1,TRIL,ANGPTL2,SERPINA3,COL6A6,WNT4,MXRA5,EDIL3,SULF1,OGN,TLR3,MATN2,CHADL,WNT5B,OLFML2A,WNT6,LOX,ECM2,BGN,CSPG4,WNT5A,TGFB2,SERPINF2,NPNT,MEGF9,ANOS1,GP1BA
	external encapsulating structure	GO:0030312	0.0238712	1.62213	566	380	24	21690	FGF1,TRIL,ANGPTL2,SERPINA3,COL6A6,WNT4,MXRA5,EDIL3,SULF1,OGN,TLR3,MATN2,CHADL,WNT5B,OLFML2A,WNT6,LOX,ECM2,BGN,CSPG4,WNT5A,TGFB2,SERPINF2,NPNT
	phospholipid-translocating ATPase complex	GO:1990531	0.0245393	1.61014	14	739	5	21690	ATP8A1,ATP10A,TMEM30A,ATP8B1,ATP11B
	Golgi apparatus	GO:0005794	0.0482912	1.31613	1650	815	91	21690	TP73,ZDHHC11B,ATP8A1,KCNJ2,CNTNAP2,HS3ST6,RAB30,WNT4,FIBIN,TLR1,SEMA6D,SULF1,OGN,TLR3,RETREG1,LFNG,MGAT4A,CPE,RSAD2,MARCHF1,TPPP,ABCA5,WNT5B,PCSK1,WNT3A,WNT6,ATP7A,CRYAB,GBP1,BGN,MTUS1,DNAJC28,RNF128,DENND4C,MANEA,GCNT4,CSPG4,ARL5B,WNT5A,PROS1,SPEF2,CASD1,ZNF148,LYSMD3,NBEA,PDGFC,MPHOSPH9,HS2ST1,ANK3,GASK1B,PJA2,GLCE,PIK3R1,MAN1A1,RHOU,CLU,AKAP9,VPS13A,ST6GALNAC2,TRIM22,TLR6,GABARAPL1,SLC2A4,G2E3…

## Sheet: DN (stiff vs native) 
Supplementary data 7. Upregulated terms in Ctrl-acini in stiff-BM versus native-BM
Source	Term name	Term ID	Adjusted p value	Negative log10 adjusted p value	Term size	Query size	Intersection size	Effective domain size	Intersections
GO:MF	structural constituent of skin epidermis	GO:0030280	1.47311e-06	5.83176	37	124	7	20166	KRT81,KRT6B,PI3,KRT75,KRT6A,KRT6C,SPRR2E
	haptoglobin binding	GO:0031720	1.82744e-06	5.73816	10	7	3	20166	HBB,HBA1,HBA2
	oxygen carrier activity	GO:0005344	6.92391e-06	5.15965	15	7	3	20166	HBB,HBA1,HBA2
	receptor ligand activity	GO:0048018	2.99151e-05	4.52411	500	305	26	20166	CXCL8,IL1B,CSF3,WNT10B,CDC42EP2,PTHLH,INHBA1,IL32,GREM1,NGF,BMP6,CXCL1,SEMA7A,GAL,TGFA,IL1A,PGF,VEGFC,BMP2,CXCL2,DKK1,FGF5,CCN2,VGF,HBEGF,CXCL3
	signaling receptor regulator activity	GO:0030545	4.08862e-05	4.38842	543	305	27	20166	CXCL8,IL1B,CSF3,WNT10B,CDC42EP2,PTHLH,INHBA1,IL32,FST,GREM1,NGF,BMP6,CXCL1,SEMA7A,GAL,TGFA,IL1A,PGF,VEGFC,BMP2,CXCL2,DKK1,FGF5,CCN2,VGF,HBEGF,CXCL3
	signaling receptor activator activity	GO:0030546	4.09767e-05	4.38746	508	305	26	20166	CXCL8,IL1B,CSF3,WNT10B,CDC42EP2,PTHLH,INHBA1,IL32,GREM1,NGF,BMP6,CXCL1,SEMA7A,GAL,TGFA,IL1A,PGF,VEGFC,BMP2,CXCL2,DKK1,FGF5,CCN2,VGF,HBEGF,CXCL3
	growth factor activity	GO:0008083	9.36508e-05	4.02849	165	296	14	20166	CSF3,INHBA1,NGF,BMP6,CXCL1,TGFA,PGF,VEGFC,BMP2,DKK1,FGF5,CCN2,VGF,HBEGF
	oxygen binding	GO:0019825	0.000138575	3.85831	39	7	3	20166	HBB,HBA1,HBA2
	protein tyrosine/threonine phosphatase activity	GO:0008330	0.000149912	3.82416	10	121	4	20166	DUSP4,DUSP2,DUSP5,DUSP6
	peroxidase activity	GO:0004601	0.00035447	3.45042	53	7	3	20166	HBB,HBA1,HBA2
	oxidoreductase activity, acting on peroxide as acceptor	GO:0016684	0.000419258	3.37752	56	7	3	20166	HBB,HBA1,HBA2
	MAP kinase tyrosine/serine/threonine phosphatase activity	GO:0017017	0.000503345	3.29813	13	121	4	20166	DUSP4,DUSP2,DUSP5,DUSP6
	[heparan sulfate]-glucosamine 3-sulfotransferase 1 activity	GO:0008467	0.000977818	3.00974	7	74	3	20166	HS3ST2,HS3ST3A1,HS3ST1
	cytokine activity	GO:0005125	0.00106848	2.97124	237	95	9	20166	CXCL8,IL1B,CSF3,WNT10B,INHBA1,IL32,GREM1,BMP6,CXCL1
	molecular carrier activity	GO:0140104	0.00126179	2.89901	82	23	4	20166	HBB,HBA1,HBA2,SCO2
	antioxidant activity	GO:0016209	0.00143514	2.84311	84	7	3	20166	HBB,HBA1,HBA2
	MAP kinase phosphatase activity	GO:0033549	0.00210472	2.67681	18	121	4	20166	DUSP4,DUSP2,DUSP5,DUSP6
	organic acid binding	GO:0043177	0.00654293	2.18423	139	7	3	20166	HBB,HBA1,HBA2
	heme binding	GO:0020037	0.00682952	2.16561	141	7	3	20166	HBB,HBA1,HBA2
	tetrapyrrole binding	GO:0046906	0.00838752	2.07637	151	7	3	20166	HBB,HBA1,HBA2
	heparan sulfate sulfotransferase activity	GO:0034483	0.0152775	1.81595	16	74	3	20166	HS3ST2,HS3ST3A1,HS3ST1
	growth factor receptor binding	GO:0070851	0.0253968	1.59522	140	296	10	20166	IL1B,CSF3,GREM1,TGFA,IL1A,PGF,VEGFC,FGF5,ECM1,HBEGF
	molecular function regulator activity	GO:0098772	0.0366257	1.43621	1967	232	42	20166	CXCL8,SERPINB2,IL1B,CSF3,PI3,ID4,WNT10B,CDC42EP2,RAPGEF3,PTHLH,Q5SRQ3,INHBA1,IL32,NCF2,A2ML1,FST,GREM1,NGF,SPRY4,BMP6,CXCL1,ANGPTL4,SEMA7A,GAL,RAB3IL1,TBC1D30,BCAR3,TGFA,SH2D3A,SNCB,IL1A,STX1A,PGF,ID1,GPSM3,VEGFC,JUN,SLPI,BMP2,SERPINB8,CXCL2,DKK1
GO:BP	epithelium development	GO:0060429	6.37378e-14	13.1956	1208	315	61	21092	KRT81,LCE3D,IL1B,IVL,KRT6B,RHCG,ZBED2,ID4,WNT10B,HES5,ROBO4,RAPGEF3,INHBA1,HS3ST3A1,FST,GREM1,MSX1,SNAI1,FAM20C,BMP6,SPRR1B,XDH,KRT75,EPHA2,KRT6A,MICAL2,MAFF,CCDC103,KRT6C,FOXF2,SPRR2E,SPRR2D,DMBT1,ALOX15B,GAL,TGM2,FOXC2,MESP1,RCN3,CYP27B1,SOX9,DLL4,IL1A,ID1,VEGFC,JUN,FOXD1,BMP2,DKK1,SPRED3,FOXQ1,NOG,DLL3,CEACAM1,FLNB,HBEGF,KLF7,CARMIL2,ETV4,HS3ST3B1,TGM1
	epidermis development	GO:0008544	3.17289e-13	12.4985	368	315	33	21092	KRT81,LCE3D,IVL,KRT6B,ZBED2,WNT10B,HES5,PTHLH,INHBA1,FST,SNAI1,SPRR1B,KRT75,EPHA2,KRT6A,MAFF,KRT6C,SPRR2E,SPRR2D,ALOX15B,GAL,CYP27B1,SOX9,IL1A,DKK1,GJB5,FOXQ1,LAMC2,CCN2,FLNB,KLF7,ETV4,TGM1
	tissue development	GO:0009888	4.17736e-12	11.3791	1973	315	77	21092	KRT81,LCE3D,IL1B,IVL,DUSP4,KRT6B,RHCG,ZBED2,ID4,WNT10B,HES5,ROBO4,FZD9,RAPGEF3,PTHLH,INHBA1,DUSP2,HS3ST3A1,FST,GREM1,MSX1,SNAI1,FAM20C,DUSP5,BMP6,SPRR1B,XDH,KRT75,EPHA2,KRT6A,MICAL2,MAFF,CCDC103,KRT6C,FOXF2,SPRR2E,SEMA7A,SPRR2D,DMBT1,ALOX15B,GAL,TGM2,FOXC2,MESP1,RCN3,CYP27B1,SOX9,DLL4,IL1A,PHLDA2,HMGA2,ID1,VEGFC,JUN,FOXD1,BMP2,SLC20A1,DKK1,SPRED3,GJB5,FOXQ1,LAMC2,NOG,TUBB3,CCN2,ECM1,DLL3,CEACAM1,…
	anatomical structure formation involved in morphogenesis	GO:0048646	1.20677e-11	10.9184	1157	406	65	21092	CXCL8,IL1B,DUSP4,SH2D2A,WNT10B,HES5,ROBO4,RAPGEF3,INHBA1,FZD8,DUSP2,GREM1,MSX1,TNFAIP3,F3,SNAI1,SPHK1,FAM20C,DUSP5ADAM8,EPHA2,ANGPTL4,TGM2,THBS1,LHX5,NRCAM,TGFA,FOXC2,MESP1,EHD1,SOX9,DLL4,IL1A,PGF,HMGA2,ID1,VEGFC,JUN,FOXD1,ETS1,BMP2,DKK1,FJX1,DSCAM,NOG,CCN2,ECM1,DLL3,RRP7A,SHB,BYSL,CEACAM1,FGFBP1,EGR3,TNFRSF12A,HOXC11,PLXNA2,TYMP,ACTN1,LHX1,TCOF1,RDH13,HK2,DLC1,EOMES
	regulation of multicellular organismal development	GO:2000026	1.09195e-10	9.9618	1394	436	74	21092	CXCL8,IL1B,CSF3,ZBED2,ID4,WNT10B,HES5,FZD9,RAPGEF3,PTHLH,INHBA1,FST,GREM1,NGF,TNFAIP3,F3,SPHK1,FAM20CADAM8,BMP6,XDH,EPHA2,MAFF,ANGPTL4,DUSP6,SEMA7A,ALOX15B,GAL,TGM2,THBS1,FOXC2,MESP1,CYP27B1,SOX9,DLL4,IL1A,PHLDA2,PGF,HMGA2,ID1,VEGFC,ETS1,BMP2,DKK1,SPRED3,DSCAM,NR1D1,NOG,CCN2,ECM1,DLL3,SHB,CEACAM1,KLF7,IKZF3,ETV4,DLX2,EGR3,CARD11,ZFP36L1,PLXNA2,MYC,TYMP,AMIGO2,LHX1,PNP,HK2,LOXL3,HGS,NSUN5,FSTL3,GJ…
	skin development	GO:0043588	1.42819e-10	9.84521	305	358	29	21092	KRT81,LCE3D,IVL,KRT6B,ZBED2,WNT10B,INHBA1,FST,SNAI1,SPRR1B,KRT75,EPHA2,KRT6A,KRT6C,SPRR2E,SPRR2D,GJB3,ALOX15B,GAL,CYP27B1,SOX9,IL1A,DKK1,FOXQ1,FLNB,ETV4,TGM1,CASP14,ZFP36L1
	epithelial cell differentiation	GO:0030855	2.30433e-10	9.63746	711	220	34	21092	KRT81,LCE3D,IL1B,IVL,KRT6B,RHCG,ZBED2,WNT10B,HES5,ROBO4,RAPGEF3,FST,GREM1,FAM20C,BMP6,SPRR1B,XDH,KRT75,EPHA2,KRT6A,MAFF,KRT6C,SPRR2E,SPRR2D,DMBT1,ALOX15B,FOXC2,MESP1,CYP27B1,SOX9,IL1A,ID1,JUN,BMP2
	regulation of epithelial cell differentiation	GO:0030856	1.33113e-09	8.87578	151	303	19	21092	IL1B,ZBED2,WNT10B,HES5,FST,BMP6,XDH,MAFF,ALOX15B,MESP1,CYP27B1,SOX9,IL1A,ID1,BMP2,SPRED3,CEACAM1,KLF7,ETV4
	anatomical structure morphogenesis	GO:0009653	4.89391e-09	8.31034	2722	406	104	21092	CXCL8,IL1B,DUSP4,ID4,SH2D2A,WNT10B,HES5,ROBO4,CDC42EP2,RAPGEF3,INHBA1,FZD8,DUSP2,HS3ST3A1,FST,GREM1,MSX1,NGF,TNFAIP3,F3,SNAI1,SPHK1,FAM20C,SPRY4,DUSP5ADAM8,BMP6,XDH,EPHA2,KRT6A,MICAL2,CCDC103,COL13A1,ANGPTL4,FOXF2,SEMA7A,MFAP2,TGM2,THBS1,LHX5,NRCAM,BCAR3,BCL2L1,TGFA,FOXC2,MESP1,EHD1,SOX9,DLL4,IL1A,PHLDA2,PGF,HMGA2,ID1,VEGFC,JUN,FOXD1,ETS1,BMP2,CDH11,DKK1,FJX1,IER3,GJB5,DSCAM,PREX1,FOXQ1,LAMC2,NOG…
	tube morphogenesis	GO:0035239	6.38365e-09	8.19493	863	404	50	21092	CXCL8,IL1B,SH2D2A,HES5,ROBO4,RAPGEF3,FZD8,HS3ST3A1,GREM1,TNFAIP3,F3,SPHK1ADAM8,XDH,EPHA2,MICAL2,CCDC103,ANGPTL4,TGM2,THBS1,NRCAM,TGFA,FOXC2,MESP1,SOX9,DLL4,IL1A,PGF,HMGA2,ID1,VEGFC,JUN,FOXD1,ETS1,BMP2,NOG,CCN2,ECM1,SHB,CEACAM1,FGFBP1,HS3ST3B1,EGR3,TNFRSF12A,ZFP36L1,MYC,TYMP,LHX1,HK2,DLC1
	keratinocyte differentiation	GO:0030216	2.2381e-08	7.65012	169	358	20	21092	KRT81,LCE3D,IVL,KRT6B,ZBED2,SPRR1B,KRT75,EPHA2,KRT6A,KRT6C,SPRR2E,SPRR2D,ALOX15B,CYP27B1,IL1A,FLNB,ETV4,TGM1,CASP14,ZFP36L1
	regulation of cell death	GO:0010941	4.29112e-08	7.36743	1637	387	70	21092	HBB,HBA1,HBA2,SERPINB2,IL1B,FOSL1,CSF3,WNT10B,FZD9,INHBA1,H3BNH8,GREM1,MSX1,NGF,EN2,TNFAIP3,SNAI1,SPHK1,G0S2,ADAM8,PHLDA1,ANGPTL4,DUSP6,MMP3,GAL,TGM2,THBS1,TNFRSF6B,PLAUR,BCL2L1,IFI6,TGFA,DHRS2,FCMR,FOXC2,SNCB,SOX9,PLEKHN1,IL1A,PHLDA2,HMGA2,PLK3,ID1,JUN,ETS1,BMP2,DKK1,PRR5,S100A9,IER3,NTSR1,FOXQ1,S100A8,NOG,CCN2,IKZF3,EGR3,TWIST2,CARD11,ATAD3A,TNFRSF12A,ZFP36L1,MAP3K9,ARHGDIA,TNFRSF10A,MYC,MYBBP1…
	epidermal cell differentiation	GO:0009913	4.6547e-08	7.33211	239	358	23	21092	KRT81,LCE3D,IVL,KRT6B,ZBED2,HES5,SPRR1B,KRT75,EPHA2,KRT6A,MAFF,KRT6C,SPRR2E,SPRR2D,ALOX15B,CYP27B1,IL1A,FLNB,KLF7,ETV4,TGM1,CASP14,ZFP36L1
	tube development	GO:0035295	6.29578e-08	7.20095	1076	404	55	21092	CXCL8,IL1B,SH2D2A,HES5,ROBO4,RAPGEF3,FZD8,HS3ST3A1,GREM1,TNFAIP3,F3,SPHK1ADAM8,XDH,EPHA2,MICAL2,CCDC103,ANGPTL4,FOXF2,TGM2,THBS1,NRCAM,TGFA,FOXC2,MESP1,RCN3,SOX9,DLL4,IL1A,PGF,HMGA2,ID1,VEGFC,JUN,FOXD1,ETS1,BMP2,GJB5,NOG,CCN2,ECM1,SHB,CEACAM1,FGFBP1,HS3ST3B1,EGR3,TNFRSF12A,ZFP36L1,PLXNA2,MYC,TYMP,LHX1,HK2,LOXL3,DLC1
	regulation of apoptotic process	GO:0042981	9.22621e-08	7.03498	1453	404	66	21092	SERPINB2,IL1B,FOSL1,WNT10B,FZD9,INHBA1,H3BNH8,GREM1,MSX1,NGF,EN2,TNFAIP3,SNAI1,SPHK1,G0S2ADAM8,PHLDA1,ANGPTL4,DUSP6,GAL,TGM2,THBS1,TNFRSF6B,PLAUR,BCL2L1,IFI6,TGFA,DHRS2,FCMR,FOXC2,SNCB,SOX9,PLEKHN1,IL1A,PHLDA2,HMGA2,PLK3,ID1,JUN,ETS1,BMP2,DKK1,PRR5,S100A9,IER3,NTSR1,FOXQ1,S100A8,NOG,IKZF3,EGR3,TWIST2,CARD11,ATAD3A,TNFRSF12A,ZFP36L1,MAP3K9,ARHGDIA,TNFRSF10A,MYC,MYBBP1A,AMIGO2,ACTN1,GRK5,CORO1A,DLC1
	cell death	GO:0008219	1.10466e-07	6.95677	2107	404	84	21092	HBB,HBA1,HBA2,SERPINB2,IL1B,FOSL1,CSF3,IFI27,WNT10B,FZD9,INHBA1,GSDMA,H3BNH8,GREM1,MSX1,NGF,EN2,TNFAIP3,SNAI1,SPHK1,G0S2ADAM8,PHLDA1,EPHA2,ANGPTL4,DUSP6,ALOX15B,MMP3,GAL,TGM2,THBS1,TNFRSF6B,PLAUR,BCL2L1,IFI6,TGFA,DHRS2,FCMR,FOXC2,SNCB,AEN,SOX9,PLEKHN1,IL1A,HIC1,PHLDA2,HMGA2,PLK3,ID1,JUN,ETS1,BMP2,DKK1,PRR5,S100A9,IER3,NTSR1,FOXQ1,S100A8,NOG,CCN2,SHB,TNS4,IKZF3,EGR3,TICAM1,TWIST2,CARD11,ATAD3A,TNF…
	angiogenesis	GO:0001525	1.39004e-07	6.85697	526	293	30	21092	CXCL8,IL1B,SH2D2A,ROBO4,RAPGEF3,FZD8,GREM1,TNFAIP3,F3,SPHK1ADAM8,EPHA2,ANGPTL4,THBS1,NRCAM,TGFA,FOXC2,DLL4,IL1A,PGF,HMGA2,ID1,VEGFC,JUN,ETS1,CCN2,ECM1,SHB,CEACAM1,FGFBP1
	keratinization	GO:0031424	1.41284e-07	6.84991	83	126	10	21092	KRT81,LCE3D,IVL,KRT6B,SPRR1B,KRT75,KRT6A,KRT6C,SPRR2E,SPRR2D
	regulation of programmed cell death	GO:0043067	2.14294e-07	6.66899	1482	404	66	21092	SERPINB2,IL1B,FOSL1,WNT10B,FZD9,INHBA1,H3BNH8,GREM1,MSX1,NGF,EN2,TNFAIP3,SNAI1,SPHK1,G0S2ADAM8,PHLDA1,ANGPTL4,DUSP6,GAL,TGM2,THBS1,TNFRSF6B,PLAUR,BCL2L1,IFI6,TGFA,DHRS2,FCMR,FOXC2,SNCB,SOX9,PLEKHN1,IL1A,PHLDA2,HMGA2,PLK3,ID1,JUN,ETS1,BMP2,DKK1,PRR5,S100A9,IER3,NTSR1,FOXQ1,S100A8,NOG,IKZF3,EGR3,TWIST2,CARD11,ATAD3A,TNFRSF12A,ZFP36L1,MAP3K9,ARHGDIA,TNFRSF10A,MYC,MYBBP1A,AMIGO2,ACTN1,GRK5,CORO1A,DLC1
	apoptotic process	GO:0006915	3.04942e-07	6.51578	1889	404	77	21092	SERPINB2,IL1B,FOSL1,IFI27,WNT10B,FZD9,INHBA1,GSDMA,H3BNH8,GREM1,MSX1,NGF,EN2,TNFAIP3,SNAI1,SPHK1,G0S2ADAM8,PHLDA1,EPHA2,ANGPTL4,DUSP6,ALOX15B,GAL,TGM2,THBS1,TNFRSF6B,PLAUR,BCL2L1,IFI6,TGFA,DHRS2,FCMR,FOXC2,SNCB,AEN,SOX9,PLEKHN1,IL1A,HIC1,PHLDA2,HMGA2,PLK3,ID1,JUN,ETS1,BMP2,DKK1,PRR5,S100A9,IER3,NTSR1,FOXQ1,S100A8,NOG,SHB,TNS4,IKZF3,EGR3,TICAM1,TWIST2,CARD11,ATAD3A,TNFRSF12A,CASP14,ZFP36L1,MAP3K9,…
	blood vessel morphogenesis	GO:0048514	3.37383e-07	6.47188	616	293	32	21092	CXCL8,IL1B,SH2D2A,ROBO4,RAPGEF3,FZD8,GREM1,TNFAIP3,F3,SPHK1ADAM8,XDH,EPHA2,ANGPTL4,THBS1,NRCAM,TGFA,FOXC2,DLL4,IL1A,PGF,HMGA2,ID1,VEGFC,JUN,ETS1,NOG,CCN2,ECM1,SHB,CEACAM1,FGFBP1
	nitric oxide transport	GO:0030185	4.6619e-07	6.33144	5	7	3	21092	HBB,HBA1,HBA2
	blood vessel development	GO:0001568	5.74886e-07	6.24042	703	293	34	21092	CXCL8,IL1B,FOSL1,SH2D2A,ROBO4,RAPGEF3,FZD8,GREM1,TNFAIP3,F3,SPHK1ADAM8,XDH,EPHA2,ANGPTL4,THBS1,NRCAM,TGFA,FOXC2,MESP1,DLL4,IL1A,PGF,HMGA2,ID1,VEGFC,JUN,ETS1,NOG,CCN2,ECM1,SHB,CEACAM1,FGFBP1
	ribosome biogenesis	GO:0042254	7.08081e-07	6.14992	307	439	27	21092	F6VJS9,NOL6,PPAN,NOP16,RRP9,RRP12,NOP2,BOP1,RRP1,IMP4,RRS1,RRP7A,BYSL,MRTO4,MRM1,URB2,SLX9,DDX51,PES1,ISG20L2,MYBBP1A,NOC4L,NOP56,DHX37,NSUN5,GEMIN4,UTP4
	cell population proliferation	GO:0008283	8.33237e-07	6.07923	1988	301	64	21092	CXCL8,ADRA1D,IL1B,FOSL1,CSF3,ID4,SH2D2A,WNT10B,HES5,FZD9,PTHLH,INHBA1,FST,H3BNH8,GREM1,MSX1,NGF,TNFAIP3,F3,SPHK1,BMP6,CXCL1,XDH,SDCBP2,EPHA2,KRT6A,PTGES,ALOX15B,GAL,THBS1,LHX5,ODC1,BCL2L1,TGFA,DHRS2,FOXC2,CYP27B1,SOX9,DLL4,IL1A,FAM83A,PHLDA2,PGF,HMGA2,ID1,VEGFC,JUN,ETS1,BMP2,NOP2,BOP1,CHD5,LAMC2,NR1D1,NOG,FGF5,CCN2,ECM1,SHB,BYSL,CEACAM1,FGFBP1,HBEGF,IKZF3
	rRNA metabolic process	GO:0016072	9.45548e-07	6.02432	268	439	25	21092	F6VJS9,NOL6,PPAN,RRP9,RRP12,NOP2,BOP1,RRP1,IMP4,RRS1,RRP7A,BYSL,MRTO4,MRM1,SLX9,POLR1G,DDX51,PES1,TCOF1,NOC4L,NOP56,DHX37,NSUN5,GEMIN4,UTP4
	regulation of developmental process	GO:0050793	9.53704e-07	6.02059	2499	436	97	21092	CXCL8,IL1B,CSF3,ZBED2,ID4,WNT10B,HES5,FZD9,CDC42EP2,RAPGEF3,PTHLH,INHBA1,FST,H3BNH8,GREM1,MSX1,NGF,TNFAIP3,F3,SNAI1,SPHK1,FAM20C,SPRY4,ADAM8,BMP6,XDH,EPHA2,MAFF,ANGPTL4,DUSP6,SEMA7A,ALOX15B,GAL,TGM2,THBS1,NRCAM,BCL2L1,FOXC2,MESP1,EHD1,CYP27B1,SOX9,DLL4,IL1A,APC2,PHLDA2,PGF,HMGA2,CSNK1E,ID1,VEGFC,FOXD1,ETS1,BMP2,CCDC85B,SLC45A3,DKK1,SMOC1,SPRED3,DSCAM,PREX1,NR1D1,NOG,CCN2,ECM1,DLL3,SHB,CEACAM1,KLF…
	ncRNA metabolic process	GO:0034660	1.08865e-06	5.96311	634	439	40	21092	F6VJS9,FOSL1,H0YIP1,NOL6,SOX9,PPAN,JUN,RRP9,ETS1,BMP2,MARS2,CTU1,RRP12,NOP2,BOP1,RRP1,IMP4,RRS1,RRP7A,BYSL,MRTO4,MRM1,YRDC,SLX9,POLR1G,TRMT61A,DDX51,FARSA,PES1,MYC,WDR4,CTU2,TCOF1,PUS1,NOC4L,NOP56,DHX37,NSUN5,GEMIN4,UTP4
	programmed cell death	GO:0012501	1.10081e-06	5.95829	1942	404	77	21092	SERPINB2,IL1B,FOSL1,IFI27,WNT10B,FZD9,INHBA1,GSDMA,H3BNH8,GREM1,MSX1,NGF,EN2,TNFAIP3,SNAI1,SPHK1,G0S2ADAM8,PHLDA1,EPHA2,ANGPTL4,DUSP6,ALOX15B,GAL,TGM2,THBS1,TNFRSF6B,PLAUR,BCL2L1,IFI6,TGFA,DHRS2,FCMR,FOXC2,SNCB,AEN,SOX9,PLEKHN1,IL1A,HIC1,PHLDA2,HMGA2,PLK3,ID1,JUN,ETS1,BMP2,DKK1,PRR5,S100A9,IER3,NTSR1,FOXQ1,S100A8,NOG,SHB,TNS4,IKZF3,EGR3,TICAM1,TWIST2,CARD11,ATAD3A,TNFRSF12A,CASP14,ZFP36L1,MAP3K9,…
	rRNA processing	GO:0006364	1.21792e-06	5.91438	230	439	23	21092	F6VJS9,NOL6,PPAN,RRP9,RRP12,NOP2,BOP1,RRP1,IMP4,RRS1,RRP7A,BYSL,MRTO4,MRM1,SLX9,DDX51,PES1,NOC4L,NOP56,DHX37,NSUN5,GEMIN4,UTP4
	positive regulation of developmental process	GO:0051094	1.49825e-06	5.82442	1337	436	63	21092	CXCL8,IL1B,CSF3,ZBED2,ID4,WNT10B,FZD9,RAPGEF3,INHBA1,FST,GREM1,NGF,F3,SNAI1,SPHK1,FAM20CADAM8,BMP6,ANGPTL4,SEMA7A,ALOX15B,GAL,TGM2,THBS1,NRCAM,FOXC2,MESP1,EHD1,CYP27B1,SOX9,IL1A,PGF,HMGA2,CSNK1E,VEGFC,FOXD1,ETS1,BMP2,DKK1,DSCAM,PREX1,NOG,CCN2,ECM1,SHB,CEACAM1,ETV4,DLX2,EGR3,ZFP36L1,HOXC11,PLXNA2,MYC,AMIGO2,LHX1,PNP,HK2,CDC20,ADRA2C,DHX37,GJC2,NFKBIZ,RBM19
	vasculature development	GO:0001944	1.76316e-06	5.75371	734	293	34	21092	CXCL8,IL1B,FOSL1,SH2D2A,ROBO4,RAPGEF3,FZD8,GREM1,TNFAIP3,F3,SPHK1ADAM8,XDH,EPHA2,ANGPTL4,THBS1,NRCAM,TGFA,FOXC2,MESP1,DLL4,IL1A,PGF,HMGA2,ID1,VEGFC,JUN,ETS1,NOG,CCN2,ECM1,SHB,CEACAM1,FGFBP1
	positive regulation of cell population proliferation	GO:0008284	3.57468e-06	5.44676	954	410	48	21092	ADRA1D,IL1B,FOSL1,CSF3,ID4,WNT10B,HES5,FZD9,PTHLH,GREM1,TNFAIP3,F3,SPHK1,BMP6,KRT6A,THBS1,LHX5,ODC1,BCL2L1,TGFA,SOX9,DLL4,IL1A,PGF,HMGA2,ID1,VEGFC,JUN,BMP2,NOP2,LAMC2,NOG,FGF5,CCN2,ECM1,FGFBP1,HBEGF,TGM1,EGR3,TICAM1,CARD11,MYC,GRK5,LHX1,PNP,CORO1A,MARCKSL1,CDC20
	positive regulation of vasculature development	GO:1904018	4.56253e-06	5.34079	166	219	14	21092	CXCL8,IL1B,RAPGEF3,GREM1,F3,SPHK1,ANGPTL4,THBS1,FOXC2,IL1A,PGF,HMGA2,VEGFC,ETS1
	positive regulation of angiogenesis	GO:0045766	4.56253e-06	5.34079	166	219	14	21092	CXCL8,IL1B,RAPGEF3,GREM1,F3,SPHK1,ANGPTL4,THBS1,FOXC2,IL1A,PGF,HMGA2,VEGFC,ETS1
	regulation of cell population proliferation	GO:0042127	5.25833e-06	5.27915	1683	419	70	21092	CXCL8,ADRA1D,IL1B,FOSL1,CSF3,ID4,WNT10B,HES5,FZD9,PTHLH,INHBA1,H3BNH8,GREM1,MSX1,NGF,TNFAIP3,F3,SPHK1,BMP6,CXCL1,XDH,KRT6A,PTGES,ALOX15B,GAL,THBS1,LHX5,ODC1,BCL2L1,TGFA,DHRS2,CYP27B1,SOX9,DLL4,IL1A,PHLDA2,PGF,HMGA2,ID1,VEGFC,JUN,ETS1,BMP2,NOP2,CHD5,LAMC2,NR1D1,NOG,FGF5,CCN2,ECM1,CEACAM1,FGFBP1,HBEGF,IKZF3,TGM1,EGR3,TICAM1,CARD11,ZFP36L1,MYC,GRK5,LHX1,PNP,CORO1A,DLC1,MARCKSL1,CDC20,HGS,TFAP4
	regulation of signal transduction	GO:0009966	6.43402e-06	5.19152	2968	296	80	21092	CXCL8,ADRA1D,IL1B,CSF3,DUSP4,WNT10B,HES5,FZD9,INHBA1,FZD8,DUSP2,FST,H3BNH8,GREM1,MSX1,NGF,TNFAIP3,F3,SNAI1,SPHK1,FAM20C,G0S2,SPRY4,DUSP5,ADAM8,BMP6,PIK3AP1,XDH,EPHA2,DUSP6,SEMA7A,SH3TC2,ALOX15B,TGM2,IRAK2,THBS1,BCAR3,TRABD2A,PLAUR,BCL2L1,IFI6,TGFA,MESP1,RCN3,CYP27B1,SOX9,DLL4,IL1A,APC2,STX1A,HIC1,PHLDA2,PLK3,CSNK1E,VEGFC,JUN,FOXD1,BMP2,SLC20A1,DKK1,MGLL,NOP2,PRR5,BOP1,S100A9,NTSR1,SPRED3,PREX1,CH…
	circulatory system development	GO:0072359	7.01231e-06	5.15414	1109	293	42	21092	CXCL8,IL1B,FOSL1,SH2D2A,ROBO4,RAPGEF3,FZD8,GREM1,MSX1,TNFAIP3,F3,SNAI1,SPHK1ADAM8,XDH,EPHA2,MICAL2,CCDC103,ANGPTL4,DUSP6,THBS1,NRCAM,TGFA,FOXC2,MESP1,SOX9,DLL4,IL1A,PGF,HMGA2,ID1,VEGFC,JUN,ETS1,BMP2,DKK1,NOG,CCN2,ECM1,SHB,CEACAM1,FGFBP1
	regulation of multicellular organismal process	GO:0051239	8.11028e-06	5.09096	2753	436	101	21092	CXCL8,ADRA1D,SERPINB2,IL1B,CSF3,ZBED2,ID4,WNT10B,HES5,FZD9,RAPGEF3,PTHLH,NAV3,INHBA1,IL32,FST,GREM1,NGF,TNFAIP3,F3,SNAI1,SPHK1,FAM20C,G0S2,ADAM8,BMP6,XDH,EPHA2,MAFF,ANGPTL4,DUSP6,SEMA7A,PTGES,KCNJ12,MFAP2,ALOX15B,GAL,TGM2,THBS1,PLAUR,FOXC2,MESP1,RFTN1,CYP27B1,SOX9,DLL4,IL1A,STX1A,PHLDA2,PGF,HMGA2,ID1,GPSM3,VEGFC,JUN,FOXD1,ETS1,BMP2,DKK1,MGLL,NTSR1,SPRED3,DSCAM,NR1D1,NOG,CCN2,ECM1,GPR3,DLL3,SHB,CE…
	response to growth factor	GO:0070848	9.69978e-06	5.01324	702	428	40	21092	CXCL8,IL1B,HES5,FST,GREM1,MSX1,NGF,SPHK1,FAM20C,SPRY4,BMP6,XDH,EPHA2,DUSP6,THBS1,EHD1,SOX9,DLL4,PGF,CSNK1E,ID1,VEGFC,JUN,FOXD1,BMP2,DKK1,SPRED3,NOG,FGF5,CCN2,FGFBP1,IER2,EGR3,ZFP36L1,PXN,MYC,LHX1,CORO1A,HGS,FSTL3
	positive regulation of multicellular organismal process	GO:0051240	1.07744e-05	4.96761	1507	436	66	21092	CXCL8,ADRA1D,IL1B,ZBED2,ID4,WNT10B,FZD9,RAPGEF3,INHBA1,IL32,FST,GREM1,NGF,F3,SNAI1,SPHK1,FAM20C,G0S2,ADAM8,BMP6,ANGPTL4,SEMA7A,MFAP2,ALOX15B,GAL,TGM2,THBS1,FOXC2,MESP1,RFTN1,CYP27B1,SOX9,IL1A,PGF,HMGA2,GPSM3,VEGFC,FOXD1,ETS1,BMP2,DKK1,NTSR1,DSCAM,NOG,CCN2,ECM1,GPR3,SHB,ETV4,EGR3,TICAM1,CARD11,ZFP36L1,HOXC11,PLXNA2,MYC,C1QTNF1,AMIGO2,LHX1,PNP,HK2,DHX37,ADM5,GJC2,NFKBIZ,RBM19
	negative regulation of apoptotic process	GO:0043066	1.4442e-05	4.84037	881	266	34	21092	SERPINB2,IL1B,FZD9,GREM1,MSX1,NGF,EN2,TNFAIP3,SNAI1,SPHK1,ADAM8,ANGPTL4,THBS1,TNFRSF6B,PLAUR,BCL2L1,IFI6,TGFA,DHRS2,FCMR,FOXC2,SNCB,SOX9,IL1A,HMGA2,PLK3,ID1,JUN,DKK1,PRR5,IER3,NTSR1,FOXQ1,NOG
	ossification	GO:0001503	1.52878e-05	4.81566	415	277	23	21092	ID4,WNT10B,FZD9,PTHLH,GREM1,SNAI1,FAM20C,BMP6,EPHA2,COL13A1,SEMA7A,FOXC2,CYP24A1,CYP27B1,SOX9,VEGFC,BMP2,CDH11,DKK1,SMOC1,NOG,CCN2,ECM1
	carbon dioxide transport	GO:0015670	2.11815e-05	4.67404	15	7	3	21092	HBB,HBA1,HBA2
	regulation of vasculature development	GO:1901342	2.44619e-05	4.61151	292	219	17	21092	CXCL8,IL1B,RAPGEF3,GREM1,TNFAIP3,F3,SPHK1,EPHA2,ANGPTL4,THBS1,FOXC2,IL1A,PGF,HMGA2,ID1,VEGFC,ETS1
	negative regulation of programmed cell death	GO:0043069	2.45035e-05	4.61077	900	266	34	21092	SERPINB2,IL1B,FZD9,GREM1,MSX1,NGF,EN2,TNFAIP3,SNAI1,SPHK1,ADAM8,ANGPTL4,THBS1,TNFRSF6B,PLAUR,BCL2L1,IFI6,TGFA,DHRS2,FCMR,FOXC2,SNCB,SOX9,IL1A,HMGA2,PLK3,ID1,JUN,DKK1,PRR5,IER3,NTSR1,FOXQ1,NOG
	oxygen transport	GO:0015671	3.16468e-05	4.49967	17	7	3	21092	HBB,HBA1,HBA2
	locomotion	GO:0040011	3.8024e-05	4.41994	1349	305	47	21092	CXCL8,IL1B,FOSL1,ROBO4,NAV3,GREM1,F3,SNAI1,SPHK1,ADAM8,CXCL1,EPHA2,SEMA7A,ALOX15B,THBS1,NRCAM,PLAUR,FOXC2,SOX9,DLL4,IL1A,PHLDA2,PGF,GPSM3,VEGFC,JUN,FOXD1,ETS1,BMP2,CXCL2,S100A9,DSCAM,PREX1,LAMC2,SPNS2,S100A8,NOG,FGF5,TUBB3,ECM1,CHST2,CEACAM1,FGFBP1,HBEGF,KLF7,CARMIL2,CXCL3
	epithelial cell proliferation	GO:0050673	5.53479e-05	4.2569	441	374	27	21092	WNT10B,HES5,FST,TNFAIP3,F3,BMP6,XDH,EPHA2,THBS1,BCL2L1,TGFA,SOX9,DLL4,PGF,ID1,VEGFC,JUN,BMP2,NR1D1,NOG,ECM1,CEACAM1,FGFBP1,TGM1,EGR3,ZFP36L1,MYC
	regulation of cell differentiation	GO:0045595	5.56149e-05	4.25481	1587	333	55	21092	IL1B,CSF3,ZBED2,ID4,WNT10B,HES5,PTHLH,INHBA1,FST,H3BNH8,GREM1,MSX1,NGF,SNAI1,FAM20C,SPRY4,ADAM8,BMP6,XDH,MAFF,SEMA7A,ALOX15B,TGM2,NRCAM,MESP1,CYP27B1,SOX9,DLL4,IL1A,APC2,CSNK1E,ID1,VEGFC,ETS1,BMP2,CCDC85B,SLC45A3,DKK1,SMOC1,SPRED3,DSCAM,PREX1,NR1D1,NOG,CCN2,DLL3,SHB,CEACAM1,KLF7,IKZF3,ETV4,DLX2,EGR3,TWIST2,CARD11
	negative regulation of cell death	GO:0060548	6.13509e-05	4.21218	1001	273	36	21092	SERPINB2,IL1B,CSF3,FZD9,GREM1,MSX1,NGF,EN2,TNFAIP3,SNAI1,SPHK1ADAM8,ANGPTL4,THBS1,TNFRSF6B,PLAUR,BCL2L1,IFI6,TGFA,DHRS2,FCMR,FOXC2,SNCB,SOX9,IL1A,HMGA2,PLK3,ID1,JUN,DKK1,PRR5,IER3,NTSR1,FOXQ1,NOG,CCN2
	chemotaxis	GO:0006935	6.31717e-05	4.19948	620	398	34	21092	CXCL8,IL1B,FOSL1,ROBO4,GREM1,F3ADAM8,CXCL1,EPHA2,SEMA7A,THBS1,NRCAM,PLAUR,PGF,GPSM3,VEGFC,FOXD1,CXCL2,S100A9,DSCAM,PREX1,LAMC2,S100A8,NOG,TUBB3,HBEGF,KLF7,CXCL3,EGR3,ROBO3,PLXNA2,TYMP,LHX1,CORO1A
	taxis	GO:0042330	6.83039e-05	4.16555	622	398	34	21092	CXCL8,IL1B,FOSL1,ROBO4,GREM1,F3ADAM8,CXCL1,EPHA2,SEMA7A,THBS1,NRCAM,PLAUR,PGF,GPSM3,VEGFC,FOXD1,CXCL2,S100A9,DSCAM,PREX1,LAMC2,S100A8,NOG,TUBB3,HBEGF,KLF7,CXCL3,EGR3,ROBO3,PLXNA2,TYMP,LHX1,CORO1A
	enzyme-linked receptor protein signaling pathway	GO:0007167	8.52472e-05	4.06932	976	296	37	21092	IL1B,HES5,INHBA1,FST,GREM1,MSX1,NGF,F3,FAM20C,SPRY4,BMP6,XDH,EPHA2,SH3TC2,THBS1,BCAR3,PLAUR,IFI6,TGFA,FOXC2,SOX9,FAM83A,PGF,ID1,VEGFC,JUN,FOXD1,BMP2,DKK1,SPRED3,NOG,FGF5,CCN2,GPRC5A,CEACAM1,FGFBP1,HBEGF
	gas transport	GO:0015669	9.41021e-05	4.0264	24	7	3	21092	HBB,HBA1,HBA2
	animal organ morphogenesis	GO:0009887	9.61788e-05	4.01692	1066	273	37	21092	ID4,WNT10B,HES5,INHBA1,HS3ST3A1,FST,GREM1,MSX1,TNFAIP3,SNAI1,FAM20C,BMP6,EPHA2,MICAL2,CCDC103,COL13A1,FOXF2,MFAP2,TGM2,BCAR3,TGFA,FOXC2,MESP1,SOX9,DLL4,PHLDA2,VEGFC,JUN,FOXD1,BMP2,DKK1,FJX1,DSCAM,LAMC2,NOG,FGF5,CCN2
	cell migration	GO:0016477	9.97883e-05	4.00092	1498	330	52	21092	CXCL8,IL1B,ROBO4,NAV3,PRSS3,H3BNH8,GREM1,TNFAIP3,F3,SNAI1,SPHK1ADAM8,CXCL1,EPHA2,SEMA7A,ALOX15B,THBS1,NRCAM,S100P,FOXC2,MESP1,SOX9,DLL4,IL1A,APC2,PHLDA2,PGF,ID1,GPSM3,VEGFC,JUN,ETS1,BMP2,CXCL2,S100A9,PREX1,LAMC2,SPNS2,S100A8,NOG,FGF5,CCN2,ECM1,CHST2,CEACAM1,FGFBP1,HBEGF,CARMIL2,CXCL3,LHX6,EGR3,TWIST2
	positive regulation of cell death	GO:0010942	0.000101808	3.99222	584	273	26	21092	HBB,HBA1,HBA2,FOSL1,WNT10B,FZD9,INHBA1,H3BNH8,MSX1,G0S2ADAM8,PHLDA1,DUSP6,MMP3,GAL,TGM2,THBS1,PLEKHN1,PHLDA2,JUN,BMP2,DKK1,S100A9,NTSR1,S100A8,CCN2
	one-carbon compound transport	GO:0019755	0.000106919	3.97095	25	7	3	21092	HBB,HBA1,HBA2
	ncRNA processing	GO:0034470	0.000117197	3.93108	441	439	29	21092	F6VJS9,NOL6,PPAN,RRP9,CTU1,RRP12,NOP2,BOP1,RRP1,IMP4,RRS1,RRP7A,BYSL,MRTO4,MRM1,YRDC,SLX9,TRMT61A,DDX51,PES1,WDR4,CTU2,PUS1,NOC4L,NOP56,DHX37,NSUN5,GEMIN4,UTP4
	cellular response to growth factor stimulus	GO:0071363	0.000125903	3.89997	673	273	28	21092	CXCL8,IL1B,HES5,FST,GREM1,MSX1,NGF,SPHK1,FAM20C,SPRY4,BMP6,XDH,THBS1,EHD1,SOX9,DLL4,PGF,CSNK1E,ID1,VEGFC,JUN,FOXD1,BMP2,DKK1,SPRED3,NOG,FGF5,CCN2
	regulation of epithelial cell proliferation	GO:0050678	0.000126474	3.898	372	374	24	21092	WNT10B,HES5,TNFAIP3,F3,BMP6,XDH,THBS1,TGFA,SOX9,DLL4,PGF,ID1,VEGFC,JUN,BMP2,NR1D1,NOG,ECM1,CEACAM1,FGFBP1,TGM1,EGR3,ZFP36L1,MYC
	regulation of angiogenesis	GO:0045765	0.000127897	3.89314	288	219	16	21092	CXCL8,IL1B,RAPGEF3,GREM1,TNFAIP3,F3,SPHK1,EPHA2,ANGPTL4,THBS1,FOXC2,IL1A,PGF,HMGA2,VEGFC,ETS1
	tissue morphogenesis	GO:0048729	0.000128064	3.89257	631	309	29	21092	ID4,HES5,INHBA1,HS3ST3A1,FST,GREM1,MSX1,SNAI1,EPHA2,KRT6A,MICAL2,CCDC103,FOXF2,TGM2,FOXC2,MESP1,SOX9,DLL4,HMGA2,VEGFC,FOXD1,BMP2,DKK1,FOXQ1,NOG,CEACAM1,HBEGF,CARMIL2,HS3ST3B1
	morphogenesis of an epithelium	GO:0002009	0.000149146	3.82639	525	309	26	21092	ID4,HES5,HS3ST3A1,FST,GREM1,SNAI1,EPHA2,KRT6A,MICAL2,CCDC103,FOXF2,TGM2,FOXC2,MESP1,SOX9,DLL4,VEGFC,FOXD1,BMP2,DKK1,FOXQ1,NOG,CEACAM1,HBEGF,CARMIL2,HS3ST3B1
	hydrogen peroxide catabolic process	GO:0042744	0.000169765	3.77015	29	7	3	21092	HBB,HBA1,HBA2
	endoderm development	GO:0007492	0.000170009	3.76953	85	406	12	21092	DUSP4,INHBA1,DUSP2,DUSP5,MESP1,HMGA2,DKK1,NOG,ZFP36L1,HOXC11,LHX1,EOMES
	cell surface receptor signaling pathway involved in heart development	GO:0061311	0.000198332	3.70261	31	266	7	21092	MSX1,SNAI1,MESP1,DLL4,BMP2,DKK1,NOG
	cell surface receptor signaling pathway	GO:0007166	0.000201849	3.69497	2816	296	73	21092	CXCL8,IL1B,CSF3,IFI27,WNT10B,HES5,FZD9,Q5SRQ3,INHBA1,FZD8,FST,H3BNH8,GREM1,MSX1,NGF,TNFAIP3,F3,SNAI1,SPHK1,FAM20C,G0S2,SPRY4,BMP6,CXCL1,XDH,CDA,EPHA2,SEMA7A,SH3TC2,IRAK2,THBS1,IL13RA2,BCAR3,TRABD2A,PLAUR,BCL2L1,IFI6,TGFA,FOXC2,MESP1,RFTN1,SOX9,DLL4,IL1A,APC2,FAM83A,STX1A,HIC1,PGF,CSNK1E,ID1,VEGFC,JUN,FOXD1,BMP2,CXCL2,DKK1,NTSR1,SPRED3,DSCAM,NOG,FGF5,TUBB3,CCN2,FCRLB,ECM1,GPRC5A,DLL3,SHB,CEACAM1,D…
	positive regulation of signal transduction	GO:0009967	0.000218214	3.66112	1523	296	48	21092	ADRA1D,IL1B,CSF3,WNT10B,HES5,FZD9,INHBA1,FZD8,GREM1,MSX1,NGF,TNFAIP3,F3,SPHK1,G0S2ADAM8,BMP6,PIK3AP1,XDH,SEMA7A,ALOX15B,TGM2,THBS1,BCAR3,PLAUR,TGFA,MESP1,CYP27B1,SOX9,DLL4,IL1A,STX1A,HIC1,CSNK1E,JUN,FOXD1,BMP2,SLC20A1,DKK1,PRR5,S100A9,CHD5,S100A8,CCN2,ECM1,GPR3,FGFBP1,HBEGF
	negative regulation of cell population proliferation	GO:0008285	0.000249275	3.60332	711	220	25	21092	CXCL8,IL1B,FOSL1,WNT10B,PTHLH,INHBA1,H3BNH8,GREM1,MSX1,NGF,TNFAIP3,CXCL1,XDH,PTGES,ALOX15B,GAL,THBS1,DHRS2,CYP27B1,SOX9,DLL4,IL1A,JUN,ETS1,BMP2
	connective tissue development	GO:0061448	0.00029473	3.53058	274	310	18	21092	ID4,WNT10B,HES5,PTHLH,GREM1,MSX1,SNAI1,BMP6,FOXC2,SOX9,HMGA2,FOXD1,BMP2,NOG,CCN2,ECM1,KLF7,DLX2
	endoderm formation	GO:0001706	0.000298277	3.52538	58	406	10	21092	DUSP4,INHBA1,DUSP2,DUSP5,MESP1,HMGA2,DKK1,NOG,LHX1,EOMES
	response to fibroblast growth factor	GO:0071774	0.000318369	3.49707	112	389	13	21092	CXCL8,FAM20C,SPRY4,THBS1,DLL4,NOG,FGF5,CCN2,FGFBP1,IER2,EGR3,ZFP36L1,LHX1
	positive regulation of epithelial cell differentiation	GO:0030858	0.000329914	3.4816	61	389	10	21092	ZBED2,WNT10B,BMP6,ALOX15B,MESP1,CYP27B1,SOX9,BMP2,ETV4,LHX1
	regulation of intracellular signal transduction	GO:1902531	0.000378595	3.42183	1714	378	61	21092	ADRA1D,IL1B,CSF3,DUSP4,FZD8,DUSP2,GREM1,MSX1,NGF,TNFAIP3,F3,SNAI1,SPHK1,SPRY4,DUSP5ADAM8,PIK3AP1,XDH,EPHA2,DUSP6,SEMA7A,TGM2,THBS1,BCAR3,PLAUR,BCL2L1,TGFA,RCN3,SOX9,IL1A,HIC1,PLK3,JUN,BMP2,SLC20A1,DKK1,NOP2,PRR5,BOP1,S100A9,SPRED3,PREX1,CHD5,NR1D1,S100A8,CCN2,ECM1,RRS1,GPR3,CEACAM1,HBEGF,DNMBP,URB2,TICAM1,CARD11,DUSP7,ARHGDIA,MYC,GPAT3,TNIP1,C1QTNF1
	peptide cross-linking	GO:0018149	0.000386588	3.41275	37	145	6	21092	IVL,PI3,SPRR1B,SPRR2E,TGM2,THBS1
	antimicrobial humoral response	GO:0019730	0.000441394	3.35517	126	240	11	21092	CXCL8,PI3,PRSS3,CXCL1,RNASE7,SPRR2A,KRT6A,DMBT1,SLPI,CXCL2,S100A9
	transmembrane receptor protein tyrosine kinase signaling pathway	GO:0007169	0.000443203	3.3534	619	296	27	21092	IL1B,GREM1,NGF,F3,FAM20C,SPRY4,XDH,EPHA2,SH3TC2,THBS1,BCAR3,PLAUR,IFI6,TGFA,FOXC2,SOX9,FAM83A,PGF,VEGFC,BMP2,NOG,FGF5,CCN2,GPRC5A,CEACAM1,FGFBP1,HBEGF
	osteoblast differentiation	GO:0001649	0.000465353	3.33222	228	266	15	21092	ID4,WNT10B,PTHLH,GREM1,SNAI1,FAM20C,BMP6,EPHA2,SEMA7A,CYP24A1,SOX9,VEGFC,BMP2,SMOC1,NOG
	negative regulation of developmental process	GO:0051093	0.000734386	3.13408	929	310	35	21092	IL1B,ID4,WNT10B,HES5,RAPGEF3,PTHLH,INHBA1,FST,GREM1,MSX1,SNAI1,SPRY4,XDH,EPHA2,SEMA7A,THBS1,BCL2L1,FOXC2,MESP1,SOX9,IL1A,ID1,VEGFC,BMP2,CCDC85B,DKK1,SPRED3,NR1D1,NOG,ECM1,DLL3,SHB,CEACAM1,KLF7,DLX2
	regulation of cell migration	GO:0030334	0.000785348	3.10494	923	299	34	21092	CXCL8,IL1B,ROBO4,NAV3,GREM1,F3,SNAI1,SPHK1,ADAM8,EPHA2,SEMA7A,ALOX15B,THBS1,FOXC2,SOX9,DLL4,IL1A,PHLDA2,PGF,GPSM3,VEGFC,JUN,ETS1,BMP2,LAMC2,SPNS2,NOG,FGF5,ECM1,CHST2,CEACAM1,FGFBP1,HBEGF,CARMIL2
	cell motility	GO:0048870	0.000901588	3.04499	1698	330	54	21092	CXCL8,IL1B,ROBO4,NAV3,PRSS3,H3BNH8,GREM1,TNFAIP3,F3,SNAI1,SPHK1ADAM8,CXCL1,EPHA2,SEMA7A,ALOX15B,THBS1,NRCAM,S100P,FOXC2,MESP1,SOX9,DLL4,IL1A,APC2,PHLDA2,PGF,ID1,GPSM3,VEGFC,JUN,ETS1,BMP2,CXCL2,S100A9,PREX1,LAMC2,SPNS2,S100A8,NOG,FGF5,CCN2,ECM1,CHST2,CEACAM1,FGFBP1,HBEGF,CARMIL2,CXCL3,LHX6,KLC3,IER2,EGR3,TWIST2
	hydrogen peroxide metabolic process	GO:0042743	0.00108466	2.96471	53	7	3	21092	HBB,HBA1,HBA2
	formation of primary germ layer	GO:0001704	0.00113417	2.94532	125	266	11	21092	DUSP4,INHBA1,DUSP2,SNAI1,DUSP5,EPHA2,FOXC2,MESP1,HMGA2,DKK1,NOG
	cellular response to fibroblast growth factor stimulus	GO:0044344	0.00126098	2.89929	106	389	12	21092	CXCL8,FAM20C,SPRY4,THBS1,DLL4,NOG,FGF5,CCN2,FGFBP1,EGR3,ZFP36L1,LHX1
	positive regulation of phosphorylation	GO:0042327	0.00127221	2.89544	821	296	31	21092	IL1B,CSF3,HES5,RAPGEF3,INHBA1,FZD8,GREM1,NGF,SPHK1,ADAM8,BMP6,EPHA2,SEMA7A,THBS1,BCAR3,PLAUR,TGFA,SH2D3A,SOX9,PGF,HMGA2,VEGFC,BMP2,DKK1,PRR5,DSCAM,FGF5,CCN2,GPRC5A,DHX34,HBEGF
	positive regulation of cell communication	GO:0010647	0.00127586	2.8942	1718	296	50	21092	ADRA1D,IL1B,CSF3,WNT10B,HES5,FZD9,INHBA1,FZD8,GREM1,MSX1,NGF,TNFAIP3,F3,SPHK1,G0S2ADAM8,BMP6,PIK3AP1,XDH,SEMA7A,ALOX15B,GAL,TGM2,THBS1,BCAR3,PLAUR,TGFA,MESP1,CYP27B1,SOX9,DLL4,IL1A,STX1A,HIC1,CSNK1E,JUN,FOXD1,BMP2,SLC20A1,DKK1,PRR5,S100A9,CHD5,S100A8,NOG,CCN2,ECM1,GPR3,FGFBP1,HBEGF
	positive regulation of signaling	GO:0023056	0.00136652	2.86438	1722	296	50	21092	ADRA1D,IL1B,CSF3,WNT10B,HES5,FZD9,INHBA1,FZD8,GREM1,MSX1,NGF,TNFAIP3,F3,SPHK1,G0S2ADAM8,BMP6,PIK3AP1,XDH,SEMA7A,ALOX15B,GAL,TGM2,THBS1,BCAR3,PLAUR,TGFA,MESP1,CYP27B1,SOX9,DLL4,IL1A,STX1A,HIC1,CSNK1E,JUN,FOXD1,BMP2,SLC20A1,DKK1,PRR5,S100A9,CHD5,S100A8,NOG,CCN2,ECM1,GPR3,FGFBP1,HBEGF
	negative regulation of cell differentiation	GO:0045596	0.00159162	2.79816	682	287	27	21092	IL1B,ID4,WNT10B,HES5,PTHLH,INHBA1,FST,GREM1,MSX1,SNAI1,SPRY4,XDH,SEMA7A,MESP1,SOX9,IL1A,ID1,VEGFC,BMP2,CCDC85B,DKK1,SPRED3,NR1D1,NOG,DLL3,SHB,CEACAM1
	astrocyte differentiation	GO:0048708	0.00173532	2.76062	81	266	9	21092	IL1B,ID4,HES5,SOX9,BMP2,S100A9,NR1D1,S100A8,NOG
	intracellular signal transduction	GO:0035556	0.00185735	2.73111	2627	382	81	21092	CXCL8,ADRA1D,IL1B,CSF3,DUSP4,PLCB2,CDC42EP2,RAPGEF3,RASD1,FZD8,DUSP2,GREM1,MSX1,NGF,TNFAIP3,F3,SNAI1,SPHK1,SPRY4,DUSP5,ADAM8,CXCL1,PIK3AP1,XDH,SDCBP2,EPHA2,DUSP6,SEMA7A,GAL,TGM2,IRAK2,THBS1,BCAR3,PLAUR,BCL2L1,IFI6,TGFA,SH2D3A,RCN3,AEN,SOX9,IL1A,HIC1,HMGA2,PLK3,JUN,BMP2,SLC20A1,DKK1,NOP2,PRR5,BOP1,S100A9,SPRED3,PREX1,CHD5,NR1D1,S100A8,CCN2,ECM1,RRS1,GPR3,CEACAM1,HBEGF,DNMBP,URB2,TICAM1,PLEK2,CARD1…
	positive regulation of response to stimulus	GO:0048584	0.00196916	2.70572	2214	296	59	21092	CXCL8,ADRA1D,IL1B,CSF3,WNT10B,HES5,FZD9,INHBA1,FZD8,GREM1,MSX1,NGF,TNFAIP3,F3,SPHK1,Q6FHM9,G0S2,ADAM8,BMP6,PIK3AP1,XDH,SEMA7A,ALOX15B,TGM2,THBS1,BCAR3,PLAUR,TGFA,FOXC2,MESP1,RFTN1,CYP27B1,SOX9,DLL4,IL1A,STX1A,HIC1,PGF,CSNK1E,GPSM3,VEGFC,JUN,FOXD1,ETS1,BMP2,SLC20A1,DKK1,PRR5,S100A9,DSCAM,CHD5,S100A8,CCN2,ECM1,GPR3,SHB,CEACAM1,FGFBP1,HBEGF
	regulation of bone mineralization	GO:0030500	0.00218383	2.66078	80	277	9	21092	WNT10B,FZD9,GREM1,FAM20C,BMP6,CYP27B1,SOX9,BMP2,ECM1
	positive regulation of epithelial cell proliferation	GO:0050679	0.00223229	2.65125	210	327	15	21092	TNFAIP3,F3,BMP6,TGFA,SOX9,PGF,ID1,VEGFC,JUN,BMP2,NOG,ECM1,FGFBP1,TGM1,EGR3
	endothelial cell proliferation	GO:0001935	0.00225304	2.64723	157	327	13	21092	F3,BMP6,XDH,EPHA2,THBS1,DLL4,PGF,VEGFC,JUN,BMP2,ECM1,FGFBP1,EGR3
	embryo development	GO:0009790	0.00255553	2.59252	1135	415	47	21092	CXCL8,FOSL1,DUSP4,SCO2,HES5,INHBA1,DUSP2,GREM1,MSX1,EN2,SNAI1,DUSP5,EPHA2,MICAL2,MAFF,CCDC103,COL13A1,FOXF2,GJB3,MFAP2,BCL2L1,FOXC2,MESP1,SOX9,DLL4,PHLDA2,HMGA2,ARNT2,VEGFC,BMP2,DKK1,GJB5,NOG,DLL3,RRP7A,BYSL,DLX2,MDFI,ZFP36L1,HOXC11,PLXNA2,LHX1,TCOF1,LOXL3,DLC1,EOMES,APBA2
	response to external stimulus	GO:0009605	0.00298489	2.52507	2814	305	71	21092	CXCL8,SERPINB2,IL1B,FOSL1,CSF3,PI3,IFI27,ROBO4,CDC42EP2,NCF2,PRSS3,GSDMA,GREM1,TNFAIP3,F3,SPHK1ADAM8,BMP6,CXCL1,RNASE7,PIK3AP1,SPRR2A,UPP1,CDA,EPHA2,KRT6A,SEMA7A,PTGES,DMBT1,MMP3,IRAK2,THBS1,NRCAM,PLAUR,ODC1,BCL2L1,IFI6,CYP24A1,CYP27B1,SOX9,IL1A,PGF,HMGA2,GPSM3,VEGFC,JUN,SLPI,FOXD1,ETS1,BMP2,CXCL2,MGLL,PRR5,S100A9,PRDM12,NTSR1,DSCAM,PREX1,LAMC2,NR1D1,SLC39A4,S100A8,NOG,TUBB3,CEACAM1,VGF,FLNB,HBEG…
	negative regulation of epithelial cell differentiation	GO:0030857	0.00317792	2.49786	49	246	7	21092	HES5,FST,XDH,SOX9,IL1A,ID1,SPRED3
	positive regulation of phosphorus metabolic process	GO:0010562	0.0032588	2.48694	903	296	32	21092	IL1B,CSF3,HES5,RAPGEF3,INHBA1,FZD8,GREM1,NGF,SPHK1,ADAM8,BMP6,EPHA2,SEMA7A,THBS1,BCAR3,PLAUR,TGFA,SH2D3A,SOX9,PGF,HMGA2,VEGFC,BMP2,DKK1,PRR5,NTSR1,DSCAM,FGF5,CCN2,GPRC5A,DHX34,HBEGF
	positive regulation of phosphate metabolic process	GO:0045937	0.0032588	2.48694	903	296	32	21092	IL1B,CSF3,HES5,RAPGEF3,INHBA1,FZD8,GREM1,NGF,SPHK1,ADAM8,BMP6,EPHA2,SEMA7A,THBS1,BCAR3,PLAUR,TGFA,SH2D3A,SOX9,PGF,HMGA2,VEGFC,BMP2,DKK1,PRR5,NTSR1,DSCAM,FGF5,CCN2,GPRC5A,DHX34,HBEGF
	regulation of locomotion	GO:0040012	0.00336385	2.47316	1030	299	35	21092	CXCL8,IL1B,ROBO4,NAV3,GREM1,F3,SNAI1,SPHK1,ADAM8,EPHA2,SEMA7A,ALOX15B,THBS1,FOXC2,SOX9,DLL4,IL1A,PHLDA2,PGF,GPSM3,VEGFC,JUN,ETS1,BMP2,DSCAM,LAMC2,SPNS2,NOG,FGF5,ECM1,CHST2,CEACAM1,FGFBP1,HBEGF,CARMIL2
	regulation of cell motility	GO:2000145	0.00339724	2.46887	985	299	34	21092	CXCL8,IL1B,ROBO4,NAV3,GREM1,F3,SNAI1,SPHK1,ADAM8,EPHA2,SEMA7A,ALOX15B,THBS1,FOXC2,SOX9,DLL4,IL1A,PHLDA2,PGF,GPSM3,VEGFC,JUN,ETS1,BMP2,LAMC2,SPNS2,NOG,FGF5,ECM1,CHST2,CEACAM1,FGFBP1,HBEGF,CARMIL2
	nephron tubule morphogenesis	GO:0072078	0.00348499	2.4578	78	389	10	21092	HES5,HS3ST3A1,GREM1,SOX9,FOXD1,BMP2,NOG,HS3ST3B1,MYC,LHX1
	mesenchyme development	GO:0060485	0.00364826	2.43791	301	406	20	21092	IL1B,GREM1,MSX1,SNAI1,FOXF2,SEMA7A,FOXC2,MESP1,SOX9,HMGA2,FOXD1,BMP2,SPRED3,NOG,DLL3,ZFP36L1,MYC,TCOF1,LOXL3,EOMES
	defense response	GO:0006952	0.00365435	2.43719	1742	294	49	21092	CXCL8,IL1B,FOSL1,PI3,IFI27,CDC42EP2,INHBA1,IL32,NCF2,PRSS3,GSDMA,TNFAIP3,F3,SPHK1ADAM8,BMP6,CXCL1,RNASE7,PIK3AP1,SPRR2A,EPHA2,KRT6A,SEMA7A,PTGES,DMBT1,MMP3,GAL,IRAK2,THBS1,BCL2L1,IFI6,FCMR,CYP27B1,IL1A,GPSM3,JUN,SLPI,ETS1,BMP2,CXCL2,MGLL,S100A9,NR1D1,S100A8,ECM1,CHST2,CEACAM1,VGF,FLNB
	regulation of endothelial cell proliferation	GO:0001936	0.00377084	2.42356	139	327	12	21092	F3,BMP6,XDH,THBS1,DLL4,PGF,VEGFC,JUN,BMP2,ECM1,FGFBP1,EGR3
	regulation of phosphorylation	GO:0042325	0.00395767	2.40256	1237	296	39	21092	IL1B,CSF3,HES5,RAPGEF3,INHBA1,FZD8,GREM1,NGF,TNFAIP3,SPHK1,SPRY4,ADAM8,BMP6,XDH,EPHA2,DUSP6,SEMA7A,THBS1,BCAR3,PLAUR,TGFA,SH2D3A,SOX9,PGF,HMGA2,VEGFC,JUN,BMP2,DKK1,PRR5,DSCAM,NOG,FGF5,CCN2,GPRC5A,SHB,CEACAM1,DHX34,HBEGF
	regulation of protein phosphorylation	GO:0001932	0.00397298	2.40088	1095	296	36	21092	IL1B,CSF3,HES5,RAPGEF3,INHBA1,FZD8,GREM1,NGF,TNFAIP3,SPHK1,SPRY4,ADAM8,BMP6,XDH,DUSP6,SEMA7A,THBS1,BCAR3,PLAUR,TGFA,SH2D3A,SOX9,PGF,HMGA2,VEGFC,JUN,BMP2,DKK1,PRR5,NOG,FGF5,CCN2,GPRC5A,SHB,CEACAM1,HBEGF
	branching involved in ureteric bud morphogenesis	GO:0001658	0.00401384	2.39644	62	389	9	21092	HS3ST3A1,GREM1,SOX9,FOXD1,BMP2,NOG,HS3ST3B1,MYC,LHX1
	mesoderm development	GO:0007498	0.00412782	2.38428	134	406	13	21092	INHBA1,SNAI1,EPHA2,FOXC2,MESP1,HMGA2,DKK1,NOG,DLL3,IKZF3,ZFP36L1,LHX1,EOMES
	cartilage development	GO:0051216	0.00439028	2.35751	204	310	14	21092	WNT10B,HES5,PTHLH,GREM1,MSX1,SNAI1,BMP6,SOX9,HMGA2,BMP2,NOG,CCN2,ECM1,DLX2
	nephron epithelium morphogenesis	GO:0072088	0.00441332	2.35523	80	389	10	21092	HES5,HS3ST3A1,GREM1,SOX9,FOXD1,BMP2,NOG,HS3ST3B1,MYC,LHX1
	inflammatory response	GO:0006954	0.00441381	2.35519	786	279	28	21092	CXCL8,IL1B,TNFAIP3,F3,SPHK1,ADAM8,BMP6,CXCL1,PIK3AP1,EPHA2,SEMA7A,PTGES,MMP3,GAL,IRAK2,THBS1,IL1A,GPSM3,JUN,ETS1,BMP2,CXCL2,MGLL,S100A9,NR1D1,S100A8,ECM1,CHST2
	regulation of phosphorus metabolic process	GO:0051174	0.00469177	2.32866	1392	296	42	21092	IL1B,CSF3,HES5,RAPGEF3,INHBA1,FZD8,GREM1,NGF,TNFAIP3,SPHK1,FAM20C,SPRY4,ADAM8,BMP6,XDH,CDA,EPHA2,DUSP6,SEMA7A,THBS1,BCAR3,PLAUR,TGFA,SH2D3A,SOX9,PGF,HMGA2,VEGFC,JUN,BMP2,DKK1,PRR5,NTSR1,DSCAM,NOG,FGF5,CCN2,GPRC5A,SHB,CEACAM1,DHX34,HBEGF
	positive regulation of protein phosphorylation	GO:0001934	0.00477169	2.32133	743	296	28	21092	IL1B,CSF3,HES5,RAPGEF3,INHBA1,FZD8,GREM1,NGF,SPHK1,ADAM8,BMP6,SEMA7A,THBS1,BCAR3,PLAUR,TGFA,SH2D3A,SOX9,PGF,HMGA2,VEGFC,BMP2,DKK1,PRR5,FGF5,CCN2,GPRC5A,HBEGF
	cell-cell signaling	GO:0007267	0.00494424	2.3059	1663	267	44	21092	ADRA1D,IL1B,WNT10B,FZD9,PTHLH,Q5SRQ3,INHBA1,FZD8,SYT5,H3BNH8,GREM1,NGF,TNFAIP3,BMP6,GJB4,GJB3,PTGES,GAL,LHX5,TRABD2A,MESP1,SNCB,GNA15,SOX9,IL1A,APC2,STX1A,HTR7,HIC1,PGF,HMGA2,CSNK1E,FOXD1,BMP2,CDH11,DKK1,FJX1,S100A9,NTSR1,GJB5,NR1D1,S100A8,NOG,FGF5
	renal tubule morphogenesis	GO:0061333	0.00554971	2.25573	82	389	10	21092	HES5,HS3ST3A1,GREM1,SOX9,FOXD1,BMP2,NOG,HS3ST3B1,MYC,LHX1
	negative regulation of cell development	GO:0010721	0.0061559	2.21071	181	310	13	21092	IL1B,ID4,HES5,PTHLH,SPRY4,SEMA7A,IL1A,ID1,NR1D1,NOG,DLL3,SHB,DLX2
	nephron morphogenesis	GO:0072028	0.00620762	2.20707	83	389	10	21092	HES5,HS3ST3A1,GREM1,SOX9,FOXD1,BMP2,NOG,HS3ST3B1,MYC,LHX1
	cellular oxidant detoxification	GO:0098869	0.00637057	2.19582	95	7	3	21092	HBB,HBA1,HBA2
	regulation of anatomical structure morphogenesis	GO:0022603	0.00689572	2.16142	919	287	31	21092	CXCL8,IL1B,CDC42EP2,RAPGEF3,GREM1,MSX1,NGF,TNFAIP3,F3,SPHK1,SPRY4,EPHA2,ANGPTL4,SEMA7A,THBS1,FOXC2,MESP1,SOX9,IL1A,PGF,HMGA2,ID1,VEGFC,ETS1,BMP2,DKK1,DSCAM,PREX1,NOG,ECM1,CEACAM1
	mesoderm formation	GO:0001707	0.00715052	2.14566	72	266	8	21092	INHBA1,SNAI1,EPHA2,FOXC2,MESP1,HMGA2,DKK1,NOG
	positive regulation of apoptotic process	GO:0043065	0.00747612	2.12632	505	419	27	21092	FOSL1,WNT10B,FZD9,INHBA1,H3BNH8,MSX1,G0S2,ADAM8,PHLDA1,DUSP6,GAL,TGM2,THBS1,PLEKHN1,PHLDA2,JUN,BMP2,S100A9,NTSR1,S100A8,TNFRSF12A,MAP3K9,TNFRSF10A,MYC,MYBBP1A,DLC1,TFAP4
	skeletal system development	GO:0001501	0.00858099	2.06646	544	392	27	21092	WNT10B,HES5,PTHLH,FST,GREM1,MSX1,SNAI1,FAM20C,BMP6,EPHA2,COL13A1,TGM2,FOXC2,SOX9,HMGA2,BMP2,CDH11,SPNS2,NOG,CCN2,ECM1,DLL3,DLX2,MDFI,HOXC11,LHX1,TCOF1
	response to hydrogen peroxide	GO:0042542	0.00858174	2.06642	124	19	4	21092	HBB,HBA1,HBA2,FOSL1
	mesoderm morphogenesis	GO:0048332	0.00881048	2.055	74	266	8	21092	INHBA1,SNAI1,EPHA2,FOXC2,MESP1,HMGA2,DKK1,NOG
	regulation of ossification	GO:0030278	0.00950005	2.02227	121	277	10	21092	WNT10B,FZD9,GREM1,FAM20C,BMP6,CYP27B1,SOX9,BMP2,DKK1,ECM1
	cellular detoxification	GO:1990748	0.00991191	2.00384	110	7	3	21092	HBB,HBA1,HBA2
	ureteric bud morphogenesis	GO:0060675	0.0100088	1.99962	69	389	9	21092	HS3ST3A1,GREM1,SOX9,FOXD1,BMP2,NOG,HS3ST3B1,MYC,LHX1
	bone mineralization	GO:0030282	0.01023	1.99013	122	277	10	21092	WNT10B,FZD9,PTHLH,GREM1,FAM20C,BMP6,CYP27B1,SOX9,BMP2,ECM1
	epithelial cell migration	GO:0010631	0.0102387	1.98976	301	361	18	21092	PRSS3,GREM1,SNAI1,EPHA2,THBS1,S100P,FOXC2,SOX9,DLL4,ID1,VEGFC,JUN,ETS1,CEACAM1,FGFBP1,HBEGF,EGR3,PXN
	lipid export from cell	GO:0140353	0.0103894	1.98341	48	194	6	21092	IL1B,INHBA1,BMP6,PTGES,GAL,IL1A
	morphogenesis of a branching structure	GO:0001763	0.0108989	1.96262	201	389	15	21092	HS3ST3A1,GREM1,EPHA2,COL13A1,TGM2,FOXC2,SOX9,DLL4,FOXD1,BMP2,NOG,HS3ST3B1,DLX2,MYC,LHX1
	regulation of phosphate metabolic process	GO:0019220	0.0111377	1.9532	1391	296	41	21092	IL1B,CSF3,HES5,RAPGEF3,INHBA1,FZD8,GREM1,NGF,TNFAIP3,SPHK1,SPRY4,ADAM8,BMP6,XDH,CDA,EPHA2,DUSP6,SEMA7A,THBS1,BCAR3,PLAUR,TGFA,SH2D3A,SOX9,PGF,HMGA2,VEGFC,JUN,BMP2,DKK1,PRR5,NTSR1,DSCAM,NOG,FGF5,CCN2,GPRC5A,SHB,CEACAM1,DHX34,HBEGF
	mesonephric tubule morphogenesis	GO:0072171	0.0113008	1.94689	70	389	9	21092	HS3ST3A1,GREM1,SOX9,FOXD1,BMP2,NOG,HS3ST3B1,MYC,LHX1
	positive regulation of programmed cell death	GO:0043068	0.0115181	1.93862	517	419	27	21092	FOSL1,WNT10B,FZD9,INHBA1,H3BNH8,MSX1,G0S2,ADAM8,PHLDA1,DUSP6,GAL,TGM2,THBS1,PLEKHN1,PHLDA2,JUN,BMP2,S100A9,NTSR1,S100A8,TNFRSF12A,MAP3K9,TNFRSF10A,MYC,MYBBP1A,DLC1,TFAP4
	epithelium migration	GO:0090132	0.011745	1.93015	304	361	18	21092	PRSS3,GREM1,SNAI1,EPHA2,THBS1,S100P,FOXC2,SOX9,DLL4,ID1,VEGFC,JUN,ETS1,CEACAM1,FGFBP1,HBEGF,EGR3,PXN
	cellular response to organic substance	GO:0071310	0.0120565	1.91878	2405	328	65	21092	CXCL8,IL1B,CSF3,HSPA6,GRAMD1B,IFI27,WNT10B,HES5,CDC42EP2,RAPGEF3,INHBA1,FST,GREM1,MSX1,NGF,TNFAIP3,F3,SPHK1,FAM20C,SPRY4,BMP6,CXCL1,XDH,GJB3,TGM2,IRAK2,THBS1,IL13RA2,BCAR3,BCL2L1,FOXC2,EHD1,CYP24A1,GNA15,CYP27B1,SOX9,DLL4,IL1A,HTR7,PGF,CSNK1E,ID1,VEGFC,JUN,FOXD1,BMP2,TWNK,CXCL2,DKK1,SPRED3,NR1D1,NOG,FGF5,CCN2,ECM1,CEACAM1,FGFBP1,FLNB,KLF7,CXCL3,H3BTX0,SRM,KLF16,EGR3,TICAM1
	regulation of epidermal cell differentiation	GO:0045604	0.0121405	1.91576	58	358	8	21092	ZBED2,HES5,MAFF,ALOX15B,CYP27B1,KLF7,ETV4,ZFP36L1
	cellular response to toxic substance	GO:0097237	0.0122446	1.91206	118	7	3	21092	HBB,HBA1,HBA2
	endothelium development	GO:0003158	0.0134473	1.87136	131	209	9	21092	IL1B,ROBO4,RAPGEF3,BMP6,XDH,FOXC2,MESP1,DLL4,ID1
	positive regulation of cell migration	GO:0030335	0.0145631	1.83675	527	299	22	21092	CXCL8,IL1B,F3,SNAI1,SPHK1,ADAM8,EPHA2,SEMA7A,THBS1,FOXC2,SOX9,IL1A,PGF,GPSM3,VEGFC,JUN,ETS1,BMP2,LAMC2,FGFBP1,HBEGF,CARMIL2
	tissue migration	GO:0090130	0.0153699	1.81333	310	361	18	21092	PRSS3,GREM1,SNAI1,EPHA2,THBS1,S100P,FOXC2,SOX9,DLL4,ID1,VEGFC,JUN,ETS1,CEACAM1,FGFBP1,HBEGF,EGR3,PXN
	regulation of biomineral tissue development	GO:0070167	0.0154699	1.81051	101	277	9	21092	WNT10B,FZD9,GREM1,FAM20C,BMP6,CYP27B1,SOX9,BMP2,ECM1
	positive regulation of locomotion	GO:0040017	0.0156209	1.80629	570	299	23	21092	CXCL8,IL1B,F3,SNAI1,SPHK1,ADAM8,EPHA2,SEMA7A,THBS1,FOXC2,SOX9,IL1A,PGF,GPSM3,VEGFC,JUN,ETS1,BMP2,DSCAM,LAMC2,FGFBP1,HBEGF,CARMIL2
	regulation of cellular response to growth factor stimulus	GO:0090287	0.0160828	1.79364	310	293	16	21092	IL1B,HES5,FST,GREM1,MSX1,FAM20C,SPRY4,XDH,THBS1,VEGFC,FOXD1,BMP2,DKK1,SPRED3,NOG,FGFBP1
	ERBB signaling pathway	GO:0038127	0.0170178	1.7691	121	296	10	21092	SH3TC2,BCAR3,PLAUR,IFI6,TGFA,SOX9,FAM83A,GPRC5A,CEACAM1,HBEGF
	cell adhesion	GO:0007155	0.0172293	1.76373	1521	404	54	21092	HBB,CXCL8,IL1B,WNT10B,HES5,ROBO4,IL32,TBCEL-TECTA,GREM1,SPRY4,ADAM8,BMP6,EPHA2,COL13A1,ADAM19,TGM2,THBS1,NRCAM,PLAUR,FOXC2,SOX9,IL1A,ID1,IGSF9B,ETS1,BMP2,CDH11,SERPINB8,S100A9,DSCAM,PREX1,LAMC2,SCARF2,S100A8,CCN2,CHST2,SHB,CEACAM1,EGR3,CARD11,TNFRSF12A,ZFP36L1,PXN,ARHGDIA,ROBO3,PLXNA2,TNIP1,C1QTNF1,AMIGO2,ACTN1,PNP,CORO1A,LOXL3,DLC1
	regulation of hair follicle development	GO:0051797	0.0172803	1.76245	20	140	4	21092	WNT10B,INHBA1,FST,GAL
	glial cell differentiation	GO:0010001	0.0174975	1.75702	231	267	13	21092	IL1B,ID4,HES5,SH3TC2,PRDM8,SOX9,BMP2,SLC45A3,S100A9,NR1D1,S100A8,NOG,FGF5
	regulation of biomineralization	GO:0110149	0.0181718	1.7406	103	277	9	21092	WNT10B,FZD9,GREM1,FAM20C,BMP6,CYP27B1,SOX9,BMP2,ECM1
	detoxification	GO:0098754	0.0183508	1.73635	135	7	3	21092	HBB,HBA1,HBA2
	cell chemotaxis	GO:0060326	0.0189491	1.72241	314	327	17	21092	CXCL8,IL1B,GREM1,ADAM8,CXCL1,EPHA2,THBS1,PGF,GPSM3,VEGFC,CXCL2,S100A9,PREX1,S100A8,HBEGF,CXCL3,EGR3
	MAPK cascade	GO:0000165	0.0201923	1.69481	769	378	32	21092	ADRA1D,IL1B,DUSP4,FZD8,DUSP2,SPHK1,SPRY4,DUSP5,ADAM8,XDH,EPHA2,DUSP6,SEMA7A,THBS1,BCAR3,TGFA,SH2D3A,SOX9,IL1A,JUN,BMP2,DKK1,SPRED3,CCN2,CEACAM1,DUSP7,MAPKAPK3,ZFP36L1,MAP3K9,MYC,TNIP1,C1QTNF1
	embryonic morphogenesis	GO:0048598	0.0206207	1.6857	616	406	29	21092	DUSP4,HES5,INHBA1,DUSP2,GREM1,MSX1,SNAI1,DUSP5,EPHA2,MICAL2,CCDC103,FOXF2,MFAP2,FOXC2,MESP1,SOX9,DLL4,HMGA2,VEGFC,DKK1,GJB5,NOG,DLX2,MDFI,ZFP36L1,HOXC11,LHX1,DLC1,EOMES
	regulation of ERBB signaling pathway	GO:1901184	0.0212995	1.67163	75	296	8	21092	SH3TC2,BCAR3,PLAUR,IFI6,TGFA,GPRC5A,CEACAM1,HBEGF
	leukocyte chemotaxis	GO:0030595	0.0214534	1.6685	239	263	13	21092	CXCL8,IL1B,GREM1,ADAM8,CXCL1,THBS1,PGF,GPSM3,VEGFC,CXCL2,S100A9,PREX1,S100A8
	positive regulation of intracellular signal transduction	GO:1902533	0.0219221	1.65912	995	281	31	21092	ADRA1D,IL1B,CSF3,FZD8,GREM1,MSX1,NGF,F3,SPHK1,ADAM8,PIK3AP1,XDH,SEMA7A,TGM2,THBS1,BCAR3,TGFA,SOX9,IL1A,HIC1,JUN,BMP2,SLC20A1,DKK1,PRR5,S100A9,CHD5,S100A8,CCN2,ECM1,GPR3
	epithelial to mesenchymal transition	GO:0001837	0.0221987	1.65367	156	406	13	21092	IL1B,GREM1,MSX1,SNAI1,FOXF2,SOX9,HMGA2,BMP2,SPRED3,NOG,TCOF1,LOXL3,EOMES
	chordate embryonic development	GO:0043009	0.0222032	1.65358	670	415	31	21092	FOSL1,SCO2,HES5,MSX1,SNAI1,EPHA2,MAFF,GJB3,BCL2L1,FOXC2,MESP1,SOX9,PHLDA2,ARNT2,BMP2,DKK1,GJB5,NOG,DLL3,RRP7A,BYSL,DLX2,MDFI,ZFP36L1,HOXC11,PLXNA2,LHX1,TCOF1,DLC1,EOMES,APBA2
	myeloid leukocyte migration	GO:0097529	0.0224335	1.6491	240	263	13	21092	CXCL8,IL1B,GREM1 ADAM8,CXCL1,THBS1,IL1A,PGF,VEGFC,CXCL2,S100A9,PREX1,S100A8
	response to oxygen-containing compound	GO:1901700	0.0226911	1.64414	1655	240	39	21092	HBB,HBA1,CXCL8,HBA2,IL1B,FOSL1,CSF3,GRAMD1B,WNT10B,RAPGEF3,INHBA1,TNFAIP3,SPHK1,BMP6,CXCL1,CDA,GJB3,MMP3,GAL,TGM2,IRAK2,THBS1,BCAR3,BCL2L1,FOXC2,CYP24A1,GNA15,CYP27B1,SOX9,IL1A,HTR7,PLK3,ID1,JUN,SLPI,TWNK,CXCL2,DKK1,S100A9
	negative regulation of Wnt signaling pathway	GO:0030178	0.0229194	1.6398	170	266	11	21092	H3BNH8,GREM1,TRABD2A,MESP1,SOX9,APC2,HIC1,CSNK1E,BMP2,DKK1,NOG
	blood vessel endothelial cell migration	GO:0043534	0.0257658	1.58896	115	327	10	21092	GREM1,EPHA2,THBS1,FOXC2,DLL4,ID1,VEGFC,ETS1,FGFBP1,EGR3
	nephron epithelium development	GO:0072009	0.02699	1.5688	119	389	11	21092	HES5,HS3ST3A1,GREM1,FOXC2,SOX9,FOXD1,BMP2,NOG,HS3ST3B1,MYC,LHX1
	regulation of epidermis development	GO:0045682	0.0288347	1.54008	65	358	8	21092	ZBED2,HES5,MAFF,ALOX15B,CYP27B1,KLF7,ETV4,ZFP36L1
	positive regulation of cell differentiation	GO:0045597	0.0300296	1.52245	877	435	38	21092	IL1B,CSF3,ZBED2,ID4,WNT10B,INHBA1,NGF,SNAI1,FAM20C,ADAM8,BMP6,SEMA7A,ALOX15B,TGM2,NRCAM,MESP1,CYP27B1,SOX9,CSNK1E,VEGFC,ETS1,BMP2,DKK1,DSCAM,PREX1,CCN2,SHB,CEACAM1,ETV4,DLX2,EGR3,ZFP36L1,PLXNA2,LHX1,PNP,ADRA2C,GJC2,NFKBIZ
	nephron tubule development	GO:0072080	0.0306176	1.51403	99	389	10	21092	HES5,HS3ST3A1,GREM1,SOX9,FOXD1,BMP2,NOG,HS3ST3B1,MYC,LHX1
	epidermal growth factor receptor signaling pathway	GO:0007173	0.0308492	1.51076	103	296	9	21092	BCAR3,PLAUR,IFI6,TGFA,SOX9,FAM83A,GPRC5A,CEACAM1,HBEGF
	positive regulation of cell motility	GO:2000147	0.0316838	1.49916	554	299	22	21092	CXCL8,IL1B,F3,SNAI1,SPHK1,ADAM8,EPHA2,SEMA7A,THBS1,FOXC2,SOX9,IL1A,PGF,GPSM3,VEGFC,JUN,ETS1,BMP2,LAMC2,FGFBP1,HBEGF,CARMIL2
	ureteric bud development	GO:0001657	0.0334691	1.47536	100	389	10	21092	HS3ST3A1,GREM1,FOXC2,SOX9,FOXD1,BMP2,NOG,HS3ST3B1,MYC,LHX1
	kidney morphogenesis	GO:0060993	0.0334691	1.47536	100	389	10	21092	HES5,HS3ST3A1,GREM1,SOX9,FOXD1,BMP2,NOG,HS3ST3B1,MYC,LHX1
	negative regulation of astrocyte differentiation	GO:0048712	0.0336838	1.47258	13	266	4	21092	ID4,HES5,NR1D1,NOG
	response to molecule of bacterial origin	GO:0002237	0.0337287	1.472	346	376	19	21092	CXCL8,IL1B,CSF3,TNFAIP3,BMP6,CXCL1,DMBT1,IRAK2,CYP27B1,IL1A,SLPI,CXCL2,S100A9,NR1D1,S100A8,CXCL3,TICAM1,MAPKAPK3,TNIP1
	response to endogenous stimulus	GO:0009719	0.0337927	1.47118	1592	328	47	21092	CXCL8,IL1B,FOSL1,WNT10B,HES5,CITED4,RAPGEF3,INHBA1,FST,GREM1,MSX1,NGF,FAM20C,SPRY4,BMP6,GAL,TGM2,THBS1,BCAR3,BCL2L1,FOXC2,EHD1,GNA15,CYP27B1,SOX9,DLL4,HTR7,PGF,CSNK1E,ID1,JUN,FOXD1,BMP2,DKK1,SPRED3,NR1D1,NOG,FGF5,CCN2,CEACAM1,VGF,FGFBP1,H3BTX0,KLF16,IER2,EGR3,TICAM1
	immune system process	GO:0002376	0.0349439	1.45663	2842	111	32	21092	CXCL8,IL1B,CSF3,PI3,IFI27,SH2D2A,WNT10B,HES5,FZD9,CDC42EP2,RAPGEF3,INHBA1,IL32,NCF2,PRSS3,FZD8,FST,GREM1,TNFAIP3,SPHK1,FAM20C,Q6FHM9,ADAM8,BMP6,CXCL1,SLAMF9,RNASE7,PIK3AP1,SPRR2A,KRT75,EPHA2,KRT6A
	mesonephric tubule development	GO:0072164	0.036546	1.43716	101	389	10	21092	HS3ST3A1,GREM1,FOXC2,SOX9,FOXD1,BMP2,NOG,HS3ST3B1,MYC,LHX1
	mesonephric epithelium development	GO:0072163	0.036546	1.43716	101	389	10	21092	HS3ST3A1,GREM1,FOXC2,SOX9,FOXD1,BMP2,NOG,HS3ST3B1,MYC,LHX1
	regulation of signal transduction by p53 class mediator	GO:1901796	0.0367288	1.43499	105	374	10	21092	MSX1,SNAI1,HIC1,PLK3,NOP2,BOP1,CHD5,RRS1,URB2,MYC
	biomineral tissue development	GO:0031214	0.039715	1.40105	174	226	10	21092	WNT10B,FZD9,PTHLH,GREM1,FAM20C,BMP6,CYP27B1,SOX9,BMP2,SLC20A1
	renal tubule development	GO:0061326	0.039863	1.39943	102	389	10	21092	HES5,HS3ST3A1,GREM1,SOX9,FOXD1,BMP2,NOG,HS3ST3B1,MYC,LHX1
	hair follicle development	GO:0001942	0.0406619	1.39081	95	254	8	21092	WNT10B,INHBA1,FST,SNAI1,GAL,SOX9,DKK1,FOXQ1
	embryo development ending in birth or egg hatching	GO:0009792	0.0415817	1.3811	692	415	31	21092	FOSL1,SCO2,HES5,MSX1,SNAI1,EPHA2,MAFF,GJB3,BCL2L1,FOXC2,MESP1,SOX9,PHLDA2,ARNT2,BMP2,DKK1,GJB5,NOG,DLL3,RRP7A,BYSL,DLX2,MDFI,ZFP36L1,HOXC11,PLXNA2,LHX1,TCOF1,DLC1,EOMES,APBA2
	positive regulation of endothelial cell proliferation	GO:0001938	0.0417126	1.37973	97	327	9	21092	F3,BMP6,PGF,VEGFC,JUN,BMP2,ECM1,FGFBP1,EGR3
	neutrophil migration	GO:1990266	0.0443585	1.35302	131	305	10	21092	CXCL8,IL1B,ADAM8,CXCL1,IL1A,CXCL2,S100A9,PREX1,S100A8,CXCL3
	leukocyte migration	GO:0050900	0.0443613	1.353	397	305	18	21092	CXCL8,IL1B,GREM1,ADAM8,CXCL1,THBS1,IL1A,PGF,GPSM3,VEGFC,CXCL2,S100A9,PREX1,SPNS2,S100A8,ECM1,CHST2,CXCL3
	neurogenesis	GO:0022008	0.0454371	1.34259	1680	270	42	21092	IL1B,ID4,WNT10B,HES5,ROBO4,FZD9,NAV3,INHBA1,FZD8,NGF,EN2,BMP6,EPHA2,SEMA7A,SH3TC2,TGM2,LHX5,NRCAM,PRDM8,MESP1,EHD1,SOX9,DLL4,CSNK1E,ID1,VEGFC,JUN,FOXD1,BMP2,CDH11,SLC45A3,DKK1,S100A9,PRDM12,DSCAM,CHD5,LAMC2,NR1D1,S100A8,NOG,FGF5,TUBB3
	granulocyte migration	GO:0097530	0.0462428	1.33496	160	305	11	21092	CXCL8,IL1B,ADAM8,CXCL1,THBS1,IL1A,CXCL2,S100A9,PREX1,S100A8,CXCL3
	ERK1 and ERK2 cascade	GO:0070371	0.0462814	1.33459	323	376	18	21092	IL1B,DUSP4,SPRY4,DUSP5,EPHA2,DUSP6,SEMA7A,SOX9,IL1A,JUN,BMP2,SPRED3,CCN2,CEACAM1,DUSP7,ZFP36L1,MYC,TNIP1
	sensory organ development	GO:0007423	0.0493169	1.307	595	266	21	21092	MYO7B,SCO2,WNT10B,HES5,INHBA1,MSX1,BMP6,EPHA2,FOXF2,MFAP2,BCAR3,FOXC2,SOX9,DLL4,JUN,BMP2,FJX1,SMOC1,SPRED3,DSCAM,NOG
	sprouting angiogenesis	GO:0002040	0.0498915	1.30197	124	327	10	21092	GREM1,EPHA2,THBS1,FOXC2,DLL4,PGF,VEGFC,CEACAM1,FGFBP1,EGR3
GO:CC	preribosome	GO:0030684	1.53732e-08	7.81324	78	439	15	21690	NOL6,PPAN,RRP9,BOP1,RRP1,IMP4,RRS1,RRP7A,BYSL,MRTO4,SLX9,PES1,NOC4L,NOP56,UTP4
	cornified envelope	GO:0001533	5.68252e-07	6.24546	58	126	8	21690	SERPINB2,IVL,PI3,SPRR1B,SPRR2A,KRT75,SPRR2E,SPRR2D
	haptoglobin-hemoglobin complex	GO:0031838	1.23809e-06	5.90725	11	7	3	21690	HBB,HBA1,HBA2
	endocytic vesicle lumen	GO:0071682	2.07309e-06	5.68338	23	21	4	21690	HBB,HBA1,HBA2,CSF3
	hemoglobin complex	GO:0005833	2.14543e-06	5.66848	13	7	3	21690	HBB,HBA1,HBA2
	90S preribosome	GO:0030686	1.09448e-05	4.96079	26	439	8	21690	NOL6,BOP1,IMP4,RRP7A,SLX9,PES1,NOC4L,UTP4
	preribosome, large subunit precursor	GO:0030687	0.000828644	3.08163	24	365	6	21690	PPAN,BOP1,RRP1,RRS1,MRTO4,PES1
	blood microparticle	GO:0072562	0.0030912	2.50987	137	7	3	21690	HBB,HBA1,HBA2
	collagen-containing extracellular matrix	GO:0062023	0.0149644	1.82494	429	277	17	21690	GREM1,F3,COL13A1,ANGPTL4,SEMA7A,ADAM19,MFAP2,TGM2,THBS1,SLPI,SERPINB8,SMOC1,S100A9,LAMC2,S100A8,CCN2,ECM1
	extracellular matrix	GO:0031012	0.0156712	1.8049	565	277	20	21690	PI3,GREM1,F3,COL13A1,ANGPTL4,SEMA7A,ADAM19,DMBT1,MFAP2,MMP3,TGM2,THBS1,SLPI,SERPINB8,SMOC1,S100A9,LAMC2,S100A8,CCN2,ECM1
	external encapsulating structure	GO:0030312	0.016061	1.79423	566	277	20	21690	PI3,GREM1,F3,COL13A1,ANGPTL4,SEMA7A,ADAM19,DMBT1,MFAP2,MMP3,TGM2,THBS1,SLPI,SERPINB8,SMOC1,S100A9,LAMC2,S100A8,CCN2,ECM1
	endocytic vesicle	GO:0030139	0.03503	1.45556	342	91	8	21690	HBB,HBA1,HBA2,CSF3,CDC42EP2,NCF2,SPHK1,ADAM8
	cytosolic small ribosomal subunit	GO:0022627	0.0364953	1.43776	48	7	2	21690	HBA1,HBA2
	small-subunit processome	GO:0032040	0.0386567	1.41278	38	439	6	21690	NOL6,RRP9,IMP4,NOC4L,NOP56,UTP4
	secretory granule	GO:0030141	0.0432626	1.36389	870	290	26	21690	HBB,IL1B,HSPA6,NCF2,PRSS3,SYT5,ADAM8,ATAD3B,CXCL1,SPRR2A,CDA,KLK10,DMBT1,GAL,THBS1,PLAUR,S100P,STX1A,VEGFC,SLPI,S100A9,S100A8,LY6K,ECM1,CEACAM1,VGF
KEGG	Malaria	KEGG:05144	1.88083e-07	6.72565	49	21	6	8064	HBB,HBA1,CXCL8,HBA2,IL1B,CSF3
	African trypanosomiasis	KEGG:05143	1.76811e-05	4.75249	36	30	5	8064	HBB,HBA1,HBA2,IL1B,PLCB2
	IL-17 signaling pathway	KEGG:04657	0.00828437	2.08174	92	21	4	8064	CXCL8,IL1B,FOSL1,CSF3
REAC	Erythrocytes take up oxygen and release carbon dioxide	REAC:R-HSA-1247673	7.32717e-06	5.13506	9	7	3	10461	HBB,HBA1,HBA2
	Formation of the cornified envelope	REAC:R-HSA-6809371	1.90512e-05	4.72008	128	126	12	10461	KRT81,LCE3D,IVL,KRT6B,PI3,SPRR1B,SPRR2A,KRT75,KRT6A,KRT6C,SPRR2E,SPRR2D
	Erythrocytes take up carbon dioxide and release oxygen	REAC:R-HSA-1237044	2.49187e-05	4.60348	13	7	3	10461	HBB,HBA1,HBA2
	O2/CO2 exchange in erythrocytes	REAC:R-HSA-1480926	2.49187e-05	4.60348	13	7	3	10461	HBB,HBA1,HBA2
	Heme signaling	REAC:R-HSA-9707616	0.00139905	2.85417	47	7	3	10461	HBB,HBA1,HBA2
	Scavenging of heme from plasma	REAC:R-HSA-2168880	0.00449208	2.34755	69	7	3	10461	HBB,HBA1,HBA2
	Keratinization	REAC:R-HSA-6805567	0.00494532	2.30581	215	126	12	10461	KRT81,LCE3D,IVL,KRT6B,PI3,SPRR1B,SPRR2A,KRT75,KRT6A,KRT6C,SPRR2E,SPRR2D
	Binding and Uptake of Ligands by Scavenger Receptors	REAC:R-HSA-2173782	0.0125394	1.90172	97	7	3	10461	HBB,HBA1,HBA2
	Cellular responses to stress	REAC:R-HSA-2262752	0.0165551	1.78107	750	7	5	10461	H3C4,HBB,HBA1,CXCL8,HBA2
	Cellular responses to stimuli	REAC:R-HSA-8953897	0.0181205	1.74183	764	7	5	10461	H3C4,HBB,HBA1,CXCL8,HBA2
	Cytoprotection by HMOX1	REAC:R-HSA-9707564	0.0249289	1.6033	122	7	3	10461	HBB,HBA1,HBA2
	Interleukin-10 signaling	REAC:R-HSA-6783783	0.0446287	1.35039	45	21	3	10461	CXCL8,IL1B,CSF3
WP	COVID-19 adverse outcome pathway	WP:WP4891	0.00129266	2.88852	15	21	3	7827	CXCL8,IL1B,CSF3
	Vitamin B12 metabolism	WP:WP1533	0.0345856	1.4611	51	18	3	7827	HBB,HBA1,IL1B
