# Supplementary material for: Endo180 and basement membrane stiffness induce OXPHOS and neoplasia in aging prostate epithelia
Source: Research Square preprint supplement (doi:10.21203/rs.3.rs-4837876/v1), 2024-09-19
Supplement: Supplementary file 6 [file 78092c33e2eb1874a5371cd4.xlsx]

## Sheet: 47 UP Ctrol & Wt
Supplementary data 6. GO terms in Wt/Ctrl intersect and Endo180-KO only (stiff-BM versus native-BM)
Source	Term name	Term ID	Adjusted p value	Negative log10 adjusted p value	Term size	Query size	Intersection size	Effective domain size	Intersections
GO:MF	oxidoreduction-driven active transmembrane transporter activity	GO:0015453	7.73598e-12	11.1115	69	43	9	20171	MT-ND2,MT-ND4L,MT-ND6,MT-ND4,MT-ND1,MT-ND5,MT-ND3,MT-CO2,MT-CYB
	NADH dehydrogenase (ubiquinone) activity	GO:0008137	1.02863e-09	8.98774	41	43	7	20171	MT-ND2,MT-ND4L,MT-ND6,MT-ND4,MT-ND1,MT-ND5,MT-ND3
	NADH dehydrogenase (quinone) activity	GO:0050136	1.23243e-09	8.90924	42	43	7	20171	MT-ND2,MT-ND4L,MT-ND6,MT-ND4,MT-ND1,MT-ND5,MT-ND3
	electron transfer activity	GO:0009055	1.32072e-09	8.87919	120	43	9	20171	MT-ND2,MT-ND4L,MT-ND6,MT-ND4,MT-ND1,MT-ND5,MT-ND3,MT-CO2,MT-CYB
	NADH dehydrogenase activity	GO:0003954	1.7451e-09	8.75818	44	43	7	20171	MT-ND2,MT-ND4L,MT-ND6,MT-ND4,MT-ND1,MT-ND5,MT-ND3
	NAD(P)H dehydrogenase (quinone) activity	GO:0003955	2.06334e-09	8.68543	45	43	7	20171	MT-ND2,MT-ND4L,MT-ND6,MT-ND4,MT-ND1,MT-ND5,MT-ND3
	oxidoreductase activity, acting on NAD(P)H, quinone or similar compound as acceptor	GO:0016655	1.17976e-08	7.92821	57	43	7	20171	MT-ND2,MT-ND4L,MT-ND6,MT-ND4,MT-ND1,MT-ND5,MT-ND3
	primary active transmembrane transporter activity	GO:0015399	3.0835e-08	7.51096	170	43	9	20171	MT-ND2,MT-ND4L,MT-ND6,MT-ND4,MT-ND1,MT-ND5,MT-ND3,MT-CO2,MT-CYB
	oxidoreductase activity, acting on NAD(P)H	GO:0016651	2.9244e-07	6.53396	89	43	7	20171	MT-ND2,MT-ND4L,MT-ND6,MT-ND4,MT-ND1,MT-ND5,MT-ND3
	active transmembrane transporter activity	GO:0022804	5.6338e-06	5.2492	419	43	10	20171	MT-ND2,MT-ND4L,MT-ND6,MT-ND4,MT-ND1,MT-ND5,MT-ND3,MT-CO2,MT-CYB,SLC7A11
	transporter activity	GO:0005215	5.42704e-05	4.26544	1230	43	14	20171	MT-ATP8,MT-ND2,MT-ATP6,MT-ND4L,MT-ND6,MT-ND4,MT-ND1,MT-ND5,MT-ND3,MT-CO2,MT-CYB,SCNN1B,ATP10A,SLC7A11
	transmembrane transporter activity	GO:0022857	0.00014347	3.84324	1124	43	13	20171	MT-ATP8,MT-ND2,MT-ATP6,MT-ND4L,MT-ND6,MT-ND4,MT-ND1,MT-ND5,MT-ND3,MT-CO2,MT-CYB,SCNN1B,SLC7A11
	oxidoreductase activity	GO:0016491	0.00975634	2.01071	753	43	9	20171	MT-ND2,MT-ND4L,MT-ND6,MT-ND4,MT-ND1,MT-ND5,MT-ND3,MT-CO2,MT-CYB
GO:BP	ATP biosynthetic process	GO:0006754	1.28877e-11	10.8898	106	41	10	21128	MT-ATP8,MT-ND2,MT-ATP6,MT-ND4L,MT-ND6,MT-ND4,MT-ND1,MT-ND5,MT-ND3,MT-CO2
	proton motive force-driven mitochondrial ATP synthesis	GO:0042776	1.38031e-11	10.86	68	41	9	21128	MT-ATP8,MT-ND2,MT-ATP6,MT-ND4L,MT-ND6,MT-ND4,MT-ND1,MT-ND5,MT-ND3
	oxidative phosphorylation	GO:0006119	1.72363e-11	10.7636	160	41	11	21128	MT-ATP8,MT-ND2,MT-ATP6,MT-ND4L,MT-ND6,MT-ND4,MT-ND1,MT-ND5,MT-ND3,MT-CO2,MT-CYB
	purine ribonucleoside triphosphate biosynthetic process	GO:0009206	3.55601e-11	10.449	117	41	10	21128	MT-ATP8,MT-ND2,MT-ATP6,MT-ND4L,MT-ND6,MT-ND4,MT-ND1,MT-ND5,MT-ND3,MT-CO2
	purine nucleoside triphosphate biosynthetic process	GO:0009145	3.88007e-11	10.4112	118	41	10	21128	MT-ATP8,MT-ND2,MT-ATP6,MT-ND4L,MT-ND6,MT-ND4,MT-ND1,MT-ND5,MT-ND3,MT-CO2
	proton motive force-driven ATP synthesis	GO:0015986	5.03859e-11	10.2977	78	41	9	21128	MT-ATP8,MT-ND2,MT-ATP6,MT-ND4L,MT-ND6,MT-ND4,MT-ND1,MT-ND5,MT-ND3
	ribonucleoside triphosphate biosynthetic process	GO:0009201	5.93294e-11	10.2267	123	41	10	21128	MT-ATP8,MT-ND2,MT-ATP6,MT-ND4L,MT-ND6,MT-ND4,MT-ND1,MT-ND5,MT-ND3,MT-CO2
	nucleoside triphosphate biosynthetic process	GO:0009142	1.42098e-10	9.84741	134	41	10	21128	MT-ATP8,MT-ND2,MT-ATP6,MT-ND4L,MT-ND6,MT-ND4,MT-ND1,MT-ND5,MT-ND3,MT-CO2
	aerobic electron transport chain	GO:0019646	2.35478e-10	9.62805	92	41	9	21128	MT-ND2,MT-ND4L,MT-ND6,MT-ND4,MT-ND1,MT-ND5,MT-ND3,MT-CO2,MT-CYB
	aerobic respiration	GO:0009060	3.32087e-10	9.47875	209	41	11	21128	MT-ATP8,MT-ND2,MT-ATP6,MT-ND4L,MT-ND6,MT-ND4,MT-ND1,MT-ND5,MT-ND3,MT-CO2,MT-CYB
	ATP synthesis coupled electron transport	GO:0042773	5.09992e-10	9.29244	100	41	9	21128	MT-ND2,MT-ND4L,MT-ND6,MT-ND4,MT-ND1,MT-ND5,MT-ND3,MT-CO2,MT-CYB
	mitochondrial ATP synthesis coupled electron transport	GO:0042775	5.09992e-10	9.29244	100	41	9	21128	MT-ND2,MT-ND4L,MT-ND6,MT-ND4,MT-ND1,MT-ND5,MT-ND3,MT-CO2,MT-CYB
	respiratory electron transport chain	GO:0022904	2.9429e-09	8.53123	121	41	9	21128	MT-ND2,MT-ND4L,MT-ND6,MT-ND4,MT-ND1,MT-ND5,MT-ND3,MT-CO2,MT-CYB
	cellular respiration	GO:0045333	3.05579e-09	8.51488	256	41	11	21128	MT-ATP8,MT-ND2,MT-ATP6,MT-ND4L,MT-ND6,MT-ND4,MT-ND1,MT-ND5,MT-ND3,MT-CO2,MT-CYB
	purine nucleotide biosynthetic process	GO:0006164	7.48169e-09	8.126	278	41	11	21128	MT-ATP8,MT-ND2,MT-ATP6,MT-ND4L,MT-ND6,MT-ND4,MT-ND1,MT-ND5,MT-ND3,MT-CO2,NMRK1
	purine-containing compound biosynthetic process	GO:0072522	1.0564e-08	7.97617	287	41	11	21128	MT-ATP8,MT-ND2,MT-ATP6,MT-ND4L,MT-ND6,MT-ND4,MT-ND1,MT-ND5,MT-ND3,MT-CO2,NMRK1
	mitochondrial electron transport, NADH to ubiquinone	GO:0006120	1.31337e-08	7.88161	51	41	7	21128	MT-ND2,MT-ND4L,MT-ND6,MT-ND4,MT-ND1,MT-ND5,MT-ND3
	ATP metabolic process	GO:0046034	2.46862e-08	7.60755	224	41	10	21128	MT-ATP8,MT-ND2,MT-ATP6,MT-ND4L,MT-ND6,MT-ND4,MT-ND1,MT-ND5,MT-ND3,MT-CO2
	purine ribonucleotide biosynthetic process	GO:0009152	2.46862e-08	7.60755	224	41	10	21128	MT-ATP8,MT-ND2,MT-ATP6,MT-ND4L,MT-ND6,MT-ND4,MT-ND1,MT-ND5,MT-ND3,MT-CO2
	nucleotide biosynthetic process	GO:0009165	3.19457e-08	7.49559	318	41	11	21128	MT-ATP8,MT-ND2,MT-ATP6,MT-ND4L,MT-ND6,MT-ND4,MT-ND1,MT-ND5,MT-ND3,MT-CO2,NMRK1
	nucleoside phosphate biosynthetic process	GO:1901293	3.53404e-08	7.45173	321	41	11	21128	MT-ATP8,MT-ND2,MT-ATP6,MT-ND4L,MT-ND6,MT-ND4,MT-ND1,MT-ND5,MT-ND3,MT-CO2,NMRK1
	ribonucleotide biosynthetic process	GO:0009260	5.30011e-08	7.27572	242	41	10	21128	MT-ATP8,MT-ND2,MT-ATP6,MT-ND4L,MT-ND6,MT-ND4,MT-ND1,MT-ND5,MT-ND3,MT-CO2
	ribose phosphate biosynthetic process	GO:0046390	7.02045e-08	7.15363	249	41	10	21128	MT-ATP8,MT-ND2,MT-ATP6,MT-ND4L,MT-ND6,MT-ND4,MT-ND1,MT-ND5,MT-ND3,MT-CO2
	purine ribonucleoside triphosphate metabolic process	GO:0009205	7.02045e-08	7.15363	249	41	10	21128	MT-ATP8,MT-ND2,MT-ATP6,MT-ND4L,MT-ND6,MT-ND4,MT-ND1,MT-ND5,MT-ND3,MT-CO2
	energy derivation by oxidation of organic compounds	GO:0015980	8.15e-08	7.08884	347	41	11	21128	MT-ATP8,MT-ND2,MT-ATP6,MT-ND4L,MT-ND6,MT-ND4,MT-ND1,MT-ND5,MT-ND3,MT-CO2,MT-CYB
	purine nucleoside triphosphate metabolic process	GO:0009144	8.5383e-08	7.06863	254	41	10	21128	MT-ATP8,MT-ND2,MT-ATP6,MT-ND4L,MT-ND6,MT-ND4,MT-ND1,MT-ND5,MT-ND3,MT-CO2
	electron transport chain	GO:0022900	8.76278e-08	7.05736	176	41	9	21128	MT-ND2,MT-ND4L,MT-ND6,MT-ND4,MT-ND1,MT-ND5,MT-ND3,MT-CO2,MT-CYB
	ribonucleoside triphosphate metabolic process	GO:0009199	9.2232e-08	7.03512	256	41	10	21128	MT-ATP8,MT-ND2,MT-ATP6,MT-ND4L,MT-ND6,MT-ND4,MT-ND1,MT-ND5,MT-ND3,MT-CO2
	nucleoside triphosphate metabolic process	GO:0009141	1.73396e-07	6.76096	273	41	10	21128	MT-ATP8,MT-ND2,MT-ATP6,MT-ND4L,MT-ND6,MT-ND4,MT-ND1,MT-ND5,MT-ND3,MT-CO2
	generation of precursor metabolites and energy	GO:0006091	6.46855e-06	5.18919	525	41	11	21128	MT-ATP8,MT-ND2,MT-ATP6,MT-ND4L,MT-ND6,MT-ND4,MT-ND1,MT-ND5,MT-ND3,MT-CO2,MT-CYB
	purine nucleotide metabolic process	GO:0006163	1.19583e-05	4.92233	557	41	11	21128	MT-ATP8,MT-ND2,MT-ATP6,MT-ND4L,MT-ND6,MT-ND4,MT-ND1,MT-ND5,MT-ND3,MT-CO2,NMRK1
	purine-containing compound metabolic process	GO:0072521	2.0568e-05	4.68681	587	41	11	21128	MT-ATP8,MT-ND2,MT-ATP6,MT-ND4L,MT-ND6,MT-ND4,MT-ND1,MT-ND5,MT-ND3,MT-CO2,NMRK1
	purine ribonucleotide metabolic process	GO:0009150	2.50046e-05	4.60198	457	41	10	21128	MT-ATP8,MT-ND2,MT-ATP6,MT-ND4L,MT-ND6,MT-ND4,MT-ND1,MT-ND5,MT-ND3,MT-CO2
	nucleotide metabolic process	GO:0009117	3.67112e-05	4.4352	621	41	11	21128	MT-ATP8,MT-ND2,MT-ATP6,MT-ND4L,MT-ND6,MT-ND4,MT-ND1,MT-ND5,MT-ND3,MT-CO2,NMRK1
	organophosphate biosynthetic process	GO:0090407	3.85722e-05	4.41373	624	41	11	21128	MT-ATP8,MT-ND2,MT-ATP6,MT-ND4L,MT-ND6,MT-ND4,MT-ND1,MT-ND5,MT-ND3,MT-CO2,NMRK1
	ribonucleotide metabolic process	GO:0009259	3.97935e-05	4.40019	480	41	10	21128	MT-ATP8,MT-ND2,MT-ATP6,MT-ND4L,MT-ND6,MT-ND4,MT-ND1,MT-ND5,MT-ND3,MT-CO2
	nucleoside phosphate metabolic process	GO:0006753	4.32465e-05	4.36405	631	41	11	21128	MT-ATP8,MT-ND2,MT-ATP6,MT-ND4L,MT-ND6,MT-ND4,MT-ND1,MT-ND5,MT-ND3,MT-CO2,NMRK1
	ribose phosphate metabolic process	GO:0019693	4.74186e-05	4.32405	489	41	10	21128	MT-ATP8,MT-ND2,MT-ATP6,MT-ND4L,MT-ND6,MT-ND4,MT-ND1,MT-ND5,MT-ND3,MT-CO2
	nucleobase-containing small molecule metabolic process	GO:0055086	0.000124608	3.90445	700	41	11	21128	MT-ATP8,MT-ND2,MT-ATP6,MT-ND4L,MT-ND6,MT-ND4,MT-ND1,MT-ND5,MT-ND3,MT-CO2,NMRK1
	mitochondrial respiratory chain complex I assembly	GO:0032981	0.000234815	3.62927	61	41	5	21128	MT-ND2,MT-ND6,MT-ND4,MT-ND1,MT-ND5
	NADH dehydrogenase complex assembly	GO:0010257	0.000234815	3.62927	61	41	5	21128	MT-ND2,MT-ND6,MT-ND4,MT-ND1,MT-ND5
	carbohydrate derivative biosynthetic process	GO:1901137	0.000961783	3.01692	676	41	10	21128	MT-ATP8,MT-ND2,MT-ATP6,MT-ND4L,MT-ND6,MT-ND4,MT-ND1,MT-ND5,MT-ND3,MT-CO2
	proton transmembrane transport	GO:1902600	0.00128622	2.89068	161	41	6	21128	MT-ATP8,MT-ATP6,MT-ND4,MT-ND5,MT-CO2,MT-CYB
	mitochondrial respiratory chain complex assembly	GO:0033108	0.00295363	2.52964	101	41	5	21128	MT-ND2,MT-ND6,MT-ND4,MT-ND1,MT-ND5
	organophosphate metabolic process	GO:0019637	0.00758015	2.12032	1060	41	11	21128	MT-ATP8,MT-ND2,MT-ATP6,MT-ND4L,MT-ND6,MT-ND4,MT-ND1,MT-ND5,MT-ND3,MT-CO2,NMRK1
	small molecule metabolic process	GO:0044281	0.0112907	1.94728	1857	41	14	21128	MT-ATP8,MT-ND2,MT-ATP6,MT-ND4L,MT-ND6,MT-ND4,MT-ND1,MT-ND5,MT-ND3,MT-CO2,SPTSSB,SCNN1B,NMRK1,SLC7A11
	energy coupled proton transmembrane transport, against electrochemical gradient	GO:0015988	0.0439804	1.35674	4	41	2	21128	MT-ND4,MT-ND5
	electron transport coupled proton transport	GO:0015990	0.0439804	1.35674	4	41	2	21128	MT-ND4,MT-ND5
	organonitrogen compound biosynthetic process	GO:1901566	0.0445474	1.35118	1805	41	13	21128	MT-ATP8,MT-ND2,MT-ATP6,MT-ND4L,MT-ND6,MT-ND4,MT-ND1,MT-ND5,MT-ND3,MT-CO2,SPTSSB,NMRK1,SLC7A11
GO:CC	inner mitochondrial membrane protein complex	GO:0098800	1.58415e-12	11.8002	164	41	11	22112	MT-ATP8,MT-ND2,MT-ATP6,MT-ND4L,MT-ND6,MT-ND4,MT-ND1,MT-ND5,MT-ND3,MT-CO2,MT-CYB
	respiratory chain complex	GO:0098803	2.19008e-11	10.6595	94	41	9	22112	MT-ND2,MT-ND4L,MT-ND6,MT-ND4,MT-ND1,MT-ND5,MT-ND3,MT-CO2,MT-CYB
	mitochondrial respirasome	GO:0005746	2.93105e-11	10.533	97	41	9	22112	MT-ND2,MT-ND4L,MT-ND6,MT-ND4,MT-ND1,MT-ND5,MT-ND3,MT-CO2,MT-CYB
	respirasome	GO:0070469	5.58351e-11	10.2531	104	41	9	22112	MT-ND2,MT-ND4L,MT-ND6,MT-ND4,MT-ND1,MT-ND5,MT-ND3,MT-CO2,MT-CYB
	NADH dehydrogenase complex	GO:0030964	1.45149e-09	8.83819	53	41	7	22112	MT-ND2,MT-ND4L,MT-ND6,MT-ND4,MT-ND1,MT-ND5,MT-ND3
	mitochondrial respiratory chain complex I	GO:0005747	1.45149e-09	8.83819	53	41	7	22112	MT-ND2,MT-ND4L,MT-ND6,MT-ND4,MT-ND1,MT-ND5,MT-ND3
	respiratory chain complex I	GO:0045271	1.45149e-09	8.83819	53	41	7	22112	MT-ND2,MT-ND4L,MT-ND6,MT-ND4,MT-ND1,MT-ND5,MT-ND3
	mitochondrial protein-containing complex	GO:0098798	1.65095e-09	8.78226	309	41	11	22112	MT-ATP8,MT-ND2,MT-ATP6,MT-ND4L,MT-ND6,MT-ND4,MT-ND1,MT-ND5,MT-ND3,MT-CO2,MT-CYB
	oxidoreductase complex	GO:1990204	2.12798e-08	7.67203	130	41	8	22112	MT-ND2,MT-ND4L,MT-ND6,MT-ND4,MT-ND1,MT-ND5,MT-ND3,MT-CYB
	mitochondrial inner membrane	GO:0005743	3.20305e-07	6.49444	507	41	11	22112	MT-ATP8,MT-ND2,MT-ATP6,MT-ND4L,MT-ND6,MT-ND4,MT-ND1,MT-ND5,MT-ND3,MT-CO2,MT-CYB
	transporter complex	GO:1990351	9.10193e-07	6.04087	424	41	10	22112	MT-ND2,MT-ND4L,MT-ND6,MT-ND4,MT-ND1,MT-ND5,MT-ND3,MT-CYB,SCNN1B,ATP10A
	organelle inner membrane	GO:0019866	9.5502e-07	6.01999	563	41	11	22112	MT-ATP8,MT-ND2,MT-ATP6,MT-ND4L,MT-ND6,MT-ND4,MT-ND1,MT-ND5,MT-ND3,MT-CO2,MT-CYB
	transmembrane transporter complex	GO:1902495	8.52397e-06	5.06936	397	41	9	22112	MT-ND2,MT-ND4L,MT-ND6,MT-ND4,MT-ND1,MT-ND5,MT-ND3,MT-CYB,SCNN1B
	mitochondrial membrane	GO:0031966	2.09627e-05	4.67855	761	41	11	22112	MT-ATP8,MT-ND2,MT-ATP6,MT-ND4L,MT-ND6,MT-ND4,MT-ND1,MT-ND5,MT-ND3,MT-CO2,MT-CYB
	mitochondrial envelope	GO:0005740	4.02754e-05	4.39496	812	41	11	22112	MT-ATP8,MT-ND2,MT-ATP6,MT-ND4L,MT-ND6,MT-ND4,MT-ND1,MT-ND5,MT-ND3,MT-CO2,MT-CYB
	envelope	GO:0031975	6.07088e-05	4.21675	1268	41	13	22112	MT-ATP8,MT-ND2,MT-ATP6,MT-ND4L,MT-ND6,MT-ND4,MT-ND1,MT-ND5,MT-ND3,MT-CO2,MT-CYB,DST,RGPD8
	organelle envelope	GO:0031967	6.07088e-05	4.21675	1268	41	13	22112	MT-ATP8,MT-ND2,MT-ATP6,MT-ND4L,MT-ND6,MT-ND4,MT-ND1,MT-ND5,MT-ND3,MT-CO2,MT-CYB,DST,RGPD8
	catalytic complex	GO:1902494	0.000452555	3.34433	1778	41	14	22112	MT-ATP8,MT-ND2,MT-ATP6,MT-ND4L,MT-ND6,MT-ND4,MT-ND1,MT-ND5,MT-ND3,MT-CO2,CFAP70,SPTSSB,MT-CYB,ARID4A
	membrane protein complex	GO:0098796	0.000926764	3.03303	1357	41	12	22112	MT-ATP8,MT-ND2,MT-ATP6,MT-ND4L,MT-ND6,MT-ND4,MT-ND1,MT-ND5,MT-ND3,MT-CO2,MT-CYB,SCNN1B
	mitochondrion	GO:0005739	0.0431312	1.36521	1693	41	11	22112	MT-ATP8,MT-ND2,MT-ATP6,MT-ND4L,MT-ND6,MT-ND4,MT-ND1,MT-ND5,MT-ND3,MT-CO2,MT-CYB
KEGG	Oxidative phosphorylation	KEGG:00190	2.28104e-12	11.6419	134	24	11	8091	MT-ATP8,MT-ND2,MT-ATP6,MT-ND4L,MT-ND6,MT-ND4,MT-ND1,MT-ND5,MT-ND3,MT-CO2,MT-CYB
	Diabetic cardiomyopathy	KEGG:05415	2.29526e-10	9.63917	203	24	11	8091	MT-ATP8,MT-ND2,MT-ATP6,MT-ND4L,MT-ND6,MT-ND4,MT-ND1,MT-ND5,MT-ND3,MT-CO2,MT-CYB
	Chemical carcinogenesis - reactive oxygen species	KEGG:05208	6.11273e-10	9.21376	222	24	11	8091	MT-ATP8,MT-ND2,MT-ATP6,MT-ND4L,MT-ND6,MT-ND4,MT-ND1,MT-ND5,MT-ND3,MT-CO2,MT-CYB
	Thermogenesis	KEGG:04714	9.8844e-10	9.00505	232	24	11	8091	MT-ATP8,MT-ND2,MT-ATP6,MT-ND4L,MT-ND6,MT-ND4,MT-ND1,MT-ND5,MT-ND3,MT-CO2,MT-CYB
	Parkinson disease	KEGG:05012	4.35995e-09	8.36052	266	24	11	8091	MT-ATP8,MT-ND2,MT-ATP6,MT-ND4L,MT-ND6,MT-ND4,MT-ND1,MT-ND5,MT-ND3,MT-CO2,MT-CYB
	Prion disease	KEGG:05020	5.54785e-09	8.25588	272	24	11	8091	MT-ATP8,MT-ND2,MT-ATP6,MT-ND4L,MT-ND6,MT-ND4,MT-ND1,MT-ND5,MT-ND3,MT-CO2,MT-CYB
	Huntington disease	KEGG:05016	1.96955e-08	7.70563	306	24	11	8091	MT-ATP8,MT-ND2,MT-ATP6,MT-ND4L,MT-ND6,MT-ND4,MT-ND1,MT-ND5,MT-ND3,MT-CO2,MT-CYB
	Amyotrophic lateral sclerosis	KEGG:05014	1.18149e-07	6.92757	362	24	11	8091	MT-ATP8,MT-ND2,MT-ATP6,MT-ND4L,MT-ND6,MT-ND4,MT-ND1,MT-ND5,MT-ND3,MT-CO2,MT-CYB
	Alzheimer disease	KEGG:05010	2.08707e-07	6.68046	382	24	11	8091	MT-ATP8,MT-ND2,MT-ATP6,MT-ND4L,MT-ND6,MT-ND4,MT-ND1,MT-ND5,MT-ND3,MT-CO2,MT-CYB
	Pathways of neurodegeneration - multiple diseases	KEGG:05022	2.00044e-06	5.69887	474	24	11	8091	MT-ATP8,MT-ND2,MT-ATP6,MT-ND4L,MT-ND6,MT-ND4,MT-ND1,MT-ND5,MT-ND3,MT-CO2,MT-CYB
	Retrograde endocannabinoid signaling	KEGG:04723	1.02428e-05	4.98958	148	24	7	8091	MT-ND2,MT-ND4L,MT-ND6,MT-ND4,MT-ND1,MT-ND5,MT-ND3
	Metabolic pathways	KEGG:01100	0.0369417	1.43248	1532	24	12	8091	MT-ATP8,MT-ND2,MT-ATP6,MT-ND4L,MT-ND6,MT-ND4,MT-ND1,MT-ND5,MT-ND3,MT-CO2,MT-CYB,NMRK1
REAC	Respiratory electron transport, ATP synthesis by chemiosmotic coupling, and heat production by uncoupling proteins.	REAC:R-HSA-163200	2.04823e-10	9.68862	127	29	10	10777	MT-ATP8,MT-ND2,MT-ATP6,MT-ND6,MT-ND4,MT-ND1,MT-ND5,MT-ND3,MT-CO2,MT-CYB
	The citric acid (TCA) cycle and respiratory electron transport	REAC:R-HSA-1428517	5.79805e-09	8.23672	177	29	10	10777	MT-ATP8,MT-ND2,MT-ATP6,MT-ND6,MT-ND4,MT-ND1,MT-ND5,MT-ND3,MT-CO2,MT-CYB
	Respiratory electron transport	REAC:R-HSA-611105	6.58134e-08	7.18169	103	29	8	10777	MT-ND2,MT-ND6,MT-ND4,MT-ND1,MT-ND5,MT-ND3,MT-CO2,MT-CYB
	Complex I biogenesis	REAC:R-HSA-6799198	2.47414e-06	5.60658	57	29	6	10777	MT-ND2,MT-ND6,MT-ND4,MT-ND1,MT-ND5,MT-ND3
WP	Electron transport chain: OXPHOS system in mitochondria	WP:WP111	1.4495e-13	12.8388	103	23	11	7899	MT-ATP8,MT-ND2,MT-ATP6,MT-ND4L,MT-ND6,MT-ND4,MT-ND1,MT-ND5,MT-ND3,MT-CO2,MT-CYB
	Oxidative phosphorylation	WP:WP623	3.48497e-10	9.4578	60	23	8	7899	MT-ND2,MT-ATP6,MT-ND4L,MT-ND6,MT-ND4,MT-ND1,MT-ND5,MT-ND3
	Mitochondrial complex I assembly model OXPHOS system	WP:WP4324	1.00833e-06	5.9964	56	23	6	7899	MT-ND2,MT-ND4L,MT-ND6,MT-ND4,MT-ND1,MT-ND5

## Sheet: 10 DN Ctrol & Wt
Supplementary data 6. GO terms in Wt/Ctrl intersect and Endo180-KO only (stiff-BM versus native-BM)
	Term name	Term ID	Adjusted p value	Negative log10 adjusted p value	Term size	Query size	Intersection size	Effective domain size	Intersections
GO:MF	alkaline phosphatase activity	GO:0004035	0.0256207	1.59141	4	1	1	20171	ALPP
GO:CC	G-protein beta/gamma-subunit complex	GO:0031680	0.0387954	1.41122	1	7	1	22112	PLCB2

## Sheet: 119 UP KO only 
Supplementary data 6. GO terms in Wt/Ctrl intersect and Endo180-KO only (stiff-BM versus native-BM)
Source	Term name	Term ID	Adjusted p value	Negative log10 adjusted p value	Term size	Query size	Intersection size	Effective domain size	Intersections
GO:BP	mitotic nuclear division	GO:0140014	0.0069912	2.15545	294	110	10	21128	CENPF,SMC2,KIF20B,ESCO2,ESCO1,KIF18A,HOXA13,SPAST,SMC5,TTK
GO:CC	microtubule organizing center	GO:0005815	0.0339259	1.46947	840	100	13	22112	PRKACB,CDKL2,IFT74,IFT80,TSGA10,CENPF,KIF20B,KIF18A,PCGF5,SASS6,SPAST,ITGB6,CNTLN
	centrosome	GO:0005813	0.0447335	1.34937	634	100	11	22112	PRKACB,CDKL2,IFT74,IFT80,CENPF,KIF20B,PCGF5,SASS6,SPAST,ITGB6,CNTLN

## Sheet: 71 DN KO only
Supplementary data 6. GO terms in Wt/Ctrl intersect and Endo180-KO only (stiff-BM versus native-BM)
Source	Term name	Term ID	Adjusted p value	Negative log10 adjusted p value	Term size	Query size	Intersection size	Effective domain size	Intersections
GO:MF	cytoskeletal motor activity	GO:0003774	0.0238525	1.62247	115	35	4	20171	MYH14,DNAH3,KIF21B,KIF17
GO:BP	positive regulation of signaling receptor activity	GO:2000273	0.00050142	3.2998	46	62	5	21128	RELN,NCF1,EDN1,ADRB2,NEURL1
	tissue development	GO:0009888	0.00261825	2.58199	1995	49	17	21128	KRT1,ITGB3,MYH14,EDNRA,SLC44A4,HOXD13,SPRR3,KLK7,PRDM1,AQP3,SERPINB3,PTGS2,SOCS3,ARG2,EDN1,NR4A1,OSR1
	muscle contraction	GO:0006936	0.00977351	2.00995	340	59	8	21128	MYH14,EDNRA,PTGS2,ARG2,EDN1,NR4A1,HTR1D,ADRB2
	response to stress	GO:0006950	0.0100812	1.99649	3980	61	27	21128	KRT1,ITGB3,NCCRP1,RTEL1-TNFRSF6B,KLK6,EDNRA,SPRR3,RELN,KLK7,PRDM1,AQP3,SERPINB3,PTGS2,UNC13D,SOCS3,IFNK,ARG2,LCN2,NCF1,EDN1,BCL2L2-PABPN1,METRNL,GCNA,RELB,SOCS1,ADRB2,TFR2
	regulation of peptidyl-tyrosine phosphorylation	GO:0050730	0.0236654	1.62589	260	62	7	21128	ITGB3,RELN,SOCS3,NCF1,HCLS1,SOCS1,NEURL1
	middle ear morphogenesis	GO:0042474	0.0282558	1.54889	20	49	3	21128	EDNRA,EDN1,OSR1
	smooth muscle contraction	GO:0006939	0.0290531	1.53681	109	59	5	21128	EDNRA,PTGS2,EDN1,HTR1D,ADRB2
	response to external stimulus	GO:0009605	0.0342718	1.46506	2861	59	21	21128	KRT1,ITGB3,EDNRA,RELN,KLK7,PRDM1,AQP3,PTGS2,UNC13D,SOCS3,IFNK,ARG2,HOXB9,LCN2,NCF1,EDN1,NR4A1,METRNL,RELB,SOCS1,ADRB2
	cellular response to organonitrogen compound	GO:0071417	0.0351746	1.45377	642	62	10	21128	ITGB3,EDNRA,PTGS2,SOCS3,EDN1,NR4A1,HTR1D,SOCS1,ADRB2,NEURL1
	muscle system process	GO:0003012	0.0493018	1.30714	425	59	8	21128	MYH14,EDNRA,PTGS2,ARG2,EDN1,NR4A1,HTR1D,ADRB2
GO:CC	cornified envelope	GO:0001533	0.000123461	3.90847	59	24	4	22112	KRT1,KLK6,SPRR3,KLK7
	Weibel-Palade body	GO:0033093	0.0159873	1.79623	6	45	2	22112	UNC13D,EDN1
	extracellular region	GO:0005576	0.0358198	1.44588	4234	24	13	22112	CDH16,FNDC7,KRT1,ITGB3,NCCRP1,HIST1H2AK,ICAM4,MYH14,KLK6,SLC44A4,SPRR3,RELN,KLK7
	extracellular exosome	GO:0070062	0.0370188	1.43158	2109	7	5	22112	CDH16,KRT1,ITGB3,NCCRP1,HIST1H2AK
	extracellular vesicle	GO:1903561	0.039099	1.40783	2133	7	5	22112	CDH16,KRT1,ITGB3,NCCRP1,HIST1H2AK
	extracellular membrane-bounded organelle	GO:0065010	0.0391876	1.40685	2134	7	5	22112	CDH16,KRT1,ITGB3,NCCRP1,HIST1H2AK
	extracellular organelle	GO:0043230	0.0391876	1.40685	2134	7	5	22112	CDH16,KRT1,ITGB3,NCCRP1,HIST1H2AK
