# Supplementary material for: Endo180 and basement membrane stiffness induce OXPHOS and neoplasia in aging prostate epithelia
Source: Research Square preprint supplement (doi:10.21203/rs.3.rs-4837876/v1), 2024-09-19
Supplement: Supplementary file 7 [file 9eefac3cca3744ed6d221a05.xlsx]

## Sheet: Sheet1
Supplementary data 10. Sustained cancer hallmark gene enrichments linked to Endo180 expression in prostate acini in stiff versus native BM
DEGs set	Cancer Hallmark Term	Gene_set	Overlap	p-value	Adjusted p-value	Odds Ratio	Combined Score	Genes	Hallmarks Ratio
Wild-type UP (n = 315)	Sustaining proliferative signals	gsea_hallmarks.gmt	36/3574	1	1	0.411405	2.36722e-09	AKAP9, AMOT, ARHGAP5, ATM, BMP7, CACNB4, CAMK2B, CAMK4, CHGB, COL4A4, GNG11, GPC4, ING2, ITGB3BP, LEPR, LGR6, LIFR, LPAR6, MAP2K6, NGFR, OGN, PDE3B, PDE5A, PLCB1, PRKG2, RASSF9, SALL4, TAS2R4, TCP11L2, TGFB2, TP73, TSLP, VANGL2, WNT3A, WNT5A, ZBED9	0.782992
	Genome inestability	gsea_hallmarks.gmt	11/747	0.918987	1	0.715314	0.060432	ABRAXAS1, ATM, FANCM, RAD51AP1, RRM2B, SALL4, SESN3, TP73, UGT1A6, UGT1A7, ZMAT3	1.14467
	Evading growth suppressors	gsea_hallmarks.gmt	35/3288	1	1	0.444719	6.90866e-08	AKAP9, AMOT, ARHGAP5, ATM, BMP7, CACNB4, CAMK2B, CAMK4, CHGB, EAF2, FAT4, GNG11, HPGD, ING2, ITGB3BP, LGR6, LPAR6, MAP2K6, NGFR, OGN, PDE3B, PDE5A, PLCB1, PRKG2, RASSF9, RGCC, TAS2R4, TCP11L2, TGFB2, TP53INP1, TP73, TSLP, WNT3A, WNT5A, ZBTB16	0.827457
	Evading immune destruction	gsea_hallmarks.gmt	10/749	0.956208	1	0.648194	0.0290258	ARHGAP5, C5, CAMK2B, CFH, DISP1, GNG11, MAP2K6, PLCB1, TFPI, VAV3	1.03783
	Sustained angiogenesis	gsea_hallmarks.gmt	14/796	0.789672	1	0.854517	0.201783	AMOT, BMP7, C5, CAMK2B, LEPR, LIFR, NGFR, PLCB1, SALL4, TGFB2, TSLP, VAV3, WNT3A, WNT5A	1.36718
	Tissue invasion and metastasis	gsea_hallmarks.gmt	32/2318	0.997743	1	0.621675	0.0014049	ADAM22, ARHGAP5, ATM, BMP7, CACNB4, CADM1, CAMK2B, CNTNAP2, COL4A4, COL8A1, CXADR, DST, EDIL3, EPHA7, FAT4, GNG11, GPC4, HMMR, ITGB3BP, LIFR, MAP2K6, NGFR, PAPLN, PDE3B, PRKG2, PLCB1, SALL4, TGFB2, VANGL2, VAV3, WNT3A, WNT5A	1.07311
	Tumor-promoting inflammation	gsea_hallmarks.gmt	8/769	0.992579	1	0.505456	0.00376476	ARHGAP5, ATM, CADM1, CNTNAP2, GNG11, MAP2K6, PLCB1, VAV3	0.808673
	Resisting cell death	gsea_hallmarks.gmt	22/1941	0.999785	1	0.509868	0.000109529	ATM, BMP7, CAMK2B, COL4A4, GNG11, HMMR, LEPR, LIFR, LPAR6, MAP2K6, NGFR, PLAG1, PLCB1, RRM2B, SALL4, SESN3, SYCP2, TGFB2, TP73, TSLP, WNT5A, ZMAT3	0.881062
	Reprogramming energy metabolism	gsea_hallmarks.gmt	17/740	0.386764	1	1.13141	1.07477	ARRDC3, ATM, ATP7A, BMP7, COX7C, CAMK2B, COX7B, LEPR, MT-CYB, NDUFA1, PDE3B, PDK4, PLCB1, RGCC, RORA, SLC16A7, TGFB2	1.78577
	Replicative immortality	gsea_hallmarks.gmt	14/547	0.261142	1	1.27579	1.71299	AMOT, ATM, BMP7, CAMK2B, EDIL3, GPC4, LIFR, MAP2K6, PLCB1, TBX2, TGFB2, VANGL2, WNT3A, WNT5A	1.98953
Control UP (n = 824)	Sustaining proliferative signals	gsea_hallmarks.gmt	131/3574	1	1	0.591045	2.2999e-09	ADRA2B, AKAP5, AKAP9, AKR1C3, AMOT, ANK3, APPBP2, ARHGAP28, ARHGAP5, ARAP2, ATF2, ATM, AXIN2, BCL2L11, BMP7, BMPR2, C5AR1, CACNA1G, CACNB2, CACNB4, CAMK2B, CAMK4, CCNE2, CCPG1, CD164, CDK1, CDNF, CHRM3, CNOT6L, CNTF, COL6A6, COPS2, CSPG4, DAAM1, DEPDC1, EPS8, ERAP2, ERBIN, FAM13A, FGF1, FGFR3, FZD6, FZD10, GADD45G, GAS1, GHR, GK, GMFB, GNA13, GNG2, GPNMB, GPR135, GPR68, HOXD10, IL6R, IL6ST, IGFBP…	0.866964
	Genome inestability	gsea_hallmarks.gmt	42/747	0.460783	1	1.03711	0.80358	ABRAXAS1, ALDH3A1, ALDH3B2, APLF, ATM, ATRX, ATXN3, BRCA2, CCNE2, CDK1, CYP1A1, CYP1B1, DCLRE1A, EID3, EPHX1, ETAA1, FANCM, GADD45G, HLTF, KAT2B, POLI, TET2, TP73, SESN1, NYNRIN, POT1, PTEN, RAD51AP1, RAD9B, RMI1, RRM2B, SESN3, SLF1, SLF2, STAG2, TNFSF10, TOP2A, UBE2W, UGT1A3, UGT1A6, UGT1A7, ZMAT3	1.32988
	Evading growth suppressors	gsea_hallmarks.gmt	117/3288	1	1	0.57631	1.71726e-09	ADRA2B, AKAP5, AKAP9, AMOT, ANK3, ARAP2, ARHGAP28, ARHGAP5, ATM, AXIN2, BCL2L11, BMF, BMI1, BMP7, BMPR2, C5AR1, CACNB4, CAMK2B, CAMK4, CCNE2, CD164, CDK1, CDK19, CDKN2C, CDNF, CHRM3, CNTF, COPS2, CRYAB, CSPG4, CYP1B1, DEPDC1, ERAP2, ERBIN, FAM13A, FGF1, FGFR3, FNIP1, FOXO6, FZD6, FZD10, GMFB, GNA13, GNG2, GPNMB, GPR135, GPR68, GULP1, HOXD10, HPGD, IGFBP5, IFIT3, IL6R, IL6ST, ITGB3BP, JAK2, KAT2B,…	0.841664
	Evading immune destruction	gsea_hallmarks.gmt	30/749	0.976411	1	0.718025	0.0171408	ARHGAP5, C1R, C5, C5AR1, CAMK2B, CFH, CLU, CTSK, GNA13, GNG2, IL6ST, JAK2, MAP2K6, MAPK10, PIK3R1, PIK3R3, PIK3C2B, PLCB1, PROS1, PTEN, SERPINF2, SOS1, SPPL2A, TFPI, TLR1, TLR3, TLR6, TMED7, TNFSF10, VAV3	0.947379
	Sustained angiogenesis	gsea_hallmarks.gmt	46/796	0.381003	1	1.06858	1.03112	AMOT, ANK3, BMP7, BMPR2, C5, C5AR1, CAMK2B, CNTF, CYP1B1, FGF1, FZD10, FZD6, GHR, GNA13, GNG2, GPNMB, HOXD10, IL6R, IL6ST, ITGB8, ITGAV, KIT, LEPR, LIFR, NCOA2, NINJ1, NOTCH1, PBX1, PDCD4, PDGFC, PIK3R1, PIK3R3, PLCB1, PLCE1, PPP1CB, SOS1, TGFB2, TLR3, TNFSF10, TSLP, VAV3, WNT3A, WNT4, WNT5A, WNT5B, WNT6	1.36688
	Tissue invasion and metastasis	gsea_hallmarks.gmt	97/2318	0.999193	1	0.721262	0.000582477	ADAM22, ANK3, ANOS1, ARHGAP5, ATF2, ATM, AXIN2, BMP7, BMPR2, CACNA1G, CACNB2, CACNB4, CADM1, CADM2, CAMK2B, CD164, CD58, CDK1, CNTNAP2, COL6A6, CTSK, CXADR, CYP1B1, DAAM1, DSC2, DST, EDIL3, EPHA7, EPS8, ERBIN, EXOC6, FAT2, FGF1, FGFR3, FZD10, FZD6, GADD45G, GNA13, GNG2, GP1BA, GPNMB, HMMR, HOXD10, ITGA9, ITGAV, ITGB3BP, ITGB8, JAK2, KIT, LIFR, LOX, LRP1, MAP2K6, MAP3K2, MAPK10, MEGF9, NCOA2, NECT…	0.989789
	Tumor-promoting inflammation	gsea_hallmarks.gmt	28/769	0.994124	1	0.648338	0.00382119	ARHGAP5, ATF2, ATM, C1R, CADM1, CD58, CNTNAP2, GNA13, GNG2, IL6ST, ITGA9, ITGAV, ITGB8, JAK2, LAMP2, MAP2K6, MAPK10, NCOA2, PLCB1, PIK3R3, PIK3R1, RPS6KA5, SOS1, SPPL2A, TLR1, TLR6, TMED7, VAV3	0.861224
	Resisting cell death	gsea_hallmarks.gmt	77/1941	0.999586	1	0.684659	0.000283338	APH1B, ATF2, ATM, BCL2L11, BMP7, BMPR2, BNIP2, BRCA2, CAMK2B, CCNE2, CD164, CDK1, CDKN2C, CNTF, COL6A6, CRYAB, CTSK, EPS8, FBXO32, FGF1, FGFR3, FOXO6, GABARAPL1, GADD45G, GCLC, GHR, GNA13, GNG2, GP1BA, HMMR, IFIT3, IL6R, IL6ST, ITGA9, ITGAV, ITGB8, JAK2, KAT2B, KIT, LAMP2, LEPR, LIFR, LPAR6, MAP2K6, MAP3K2, MAPK10, MEIS1, MYB, NCOA2, NOTCH1, NRG4, PBX1, PDCD4, PDGFC, PIK3R1, PIK3R3, PLCB1, PSAPL1…	0.938317
	Reprogramming energy metabolism	gsea_hallmarks.gmt	39/740	0.631675	1	0.96598	0.443753	AGL, ALDH3A1, ALDH3B2, ALDH6A1, ARRDC3, ATF2, ATM, ATP7A, BCL2L11, BMP7, CAMK2B, FBXO32, FGFR3, FOXO6, GABARAPL1, GADD45G, IDH1, JAK2, KIT, LEPR, MAPK10, MT-CYB, NCOA2, NDUFA5, NOTCH1, PBX1, PDK3, PDK4, PLCB1, PIK3R3, PIK3R1, PTEN, RORA, SLC2A4, SOS1, TET2, TGFB2, TNFSF10, ULK1	1.24657
	Replicative immortality	gsea_hallmarks.gmt	47/547	0.00155829	0.0155829	1.66941	10.7914	AMOT, ATM, ATRX, AXIN2, BCL11A, BMI1, BMP7, BMPR2, BRCA2, CAMK2B, CDK1, CDK19, CDKN1C, CDKN2C, DAAM1, EDIL3, FGF1, FGFR3, FOXO6, FZD10, FZD6, IGFBP5, IL6ST, JAK2, LIFR, MAP2K6, MAPK10, MEIS1, NOTCH1, POT1, PIK3C2B, PIK3R1, PIK3R3, PLCB1, PTEN, SOS1, SOX2, STAG2, TBL1XR1, TGFB2, WNT3A, WNT4, WNT5A, WNT5B, WNT6, VANGL2, ZFYVE16	2.03233
Endo180-KO DN (n = 275)	Sustaining proliferative signals	gsea_hallmarks.gmt	89/3574	0.000638689	0.00159672	1.5561	11.4468	ADRA1D, ADRB2, APC2, BCAR3, BCL2L1, BDKRB1, BMP2, BMP6, CEACAM1, CSF3, CXCL1, CXCL2, CXCL8, DLC1, DLL4, DUSP2, DUSP4, DUSP5, ECM1, EDN1, EDNRA, EPHA2, ESM1, ETS1, FAM83A, FLNC, FOSL1, FST, FZD8, FZD9, GPR3, GPRC5A, GREM1, HBEGF, HCAR3, HCLS1, HES5, HSH2D, HTR1D, ID1, ID2, ID4, IFNK, IL1A, IL1B, IL11, IL32, INHBA, IRAK2, IRF9, ITGB3, JUN, KRT6A, MAPK8IP2, METRNL, MRGPRX3, MX1, NCCRP1, NGF, NOG, NR…	1.00577
	Genome inestability	gsea_hallmarks.gmt	4/747	0.999534	0.999534	0.312882	0.000145799	BCL2L1, PTGS2, RTEL1-TNFRSF6B, THBS1	0.216273
	Evading growth suppressors	gsea_hallmarks.gmt	79/3288	0.00409132	0.00818264	1.45929	8.02446	ADRA1D, ADRB2, ALOX15B, APC2, BCAR3, BCL2L1, BDKRB1, BMP2, BMP6, CCDC85B, CDA, CDH16, CEACAM1, CSF3, CXCL1, CXCL2, CXCL8, CYP24A1, DHRS2, DLC1, DLL4, ECM1, EDNRA, EPHA2, ETS1, FAM83A, FOSL1, FST, FZD8, FZD9, GAL, GPR3, GPRC5A, GREM1, HBEGF, HCAR3, HTR1D, HSH2D, ID1, ID2, ID4, IFNK, IL11, IL1A, IL1B, IL32, INHBA, IRAK2, ITGB3, JUN, MAPK8IP2, METRNL, MRGPRX3, MX1, NEURL1, NFKBIE, NGF, NOG, NR4A1, O…	0.970418
	Evading immune destruction	gsea_hallmarks.gmt	20/749	0.0576251	0.0720314	1.54558	4.41077	BDKRB1, CXCL1, CXCL2, CXCL3, EPHA2, F3, IL1A, IL1B, JUN, NCF1, NCF2, NFKBIE, PRDM1, PREX1, RAPGEF3, SERPINB2, SOCS1, SOCS3, SPHK1, TNFAIP3	1.07848
	Sustained angiogenesis	gsea_hallmarks.gmt	30/796	0.000136398	0.00136398	2.27201	20.2207	BMP2, CSF3, CXCL1, CXCL2, CXCL3, CXCL8, ECM1, EPHA2, ETS1, F3, FLNC, FZD8, FZD9, GREM1, HBEGF, HCLS1, IFNK, IL11, IL1A, IL1B, INHBA, ITGB3, KRT1, PTGS2, RAPGEF3, SH2D2A, SPHK1, TGFA, THBS1, WNT10B	1.5222
	Tissue invasion and metastasis	gsea_hallmarks.gmt	64/2318	0.000349383	0.00154051	1.69516	13.4924	APC2, BCL2L1, BDKRB1, BMP2, BMP6, CARMIL2, CDH16, CEACAM1, COL13A1, DSCAM, DUSP2, DUSP4, DUSP5, EPHA2, ETS1, FLNC, FOSL1, FOXF2, FST, FZD8, FZD9, HBEGF, HCLS1, HES5, ICAM4, ID1, ID2, ID4, IGSF9B, IL1A, IL1B, IL32, INHBA, ITGB3, JUN, KRT6A, MAPK8IP2, MMP3, MYH14, NGF, NOG, NR4A1, NRCAM, PLXNA2, PPP2R2C, PRDM1, PTGS2, RASA4B, RAPGEF3, RELB, RELN, S100A8, SERPINB2, SH2D2A, SNAI1, SOCS1, SOCS3, SPHK1…	1.11514
	Tumor-promoting inflammation	gsea_hallmarks.gmt	22/769	0.0251344	0.0365695	1.66649	6.13853	BCL2L1, CXCL1, CXCL2, CXCL3, EDN1, IL1A, IL1B, ITGB3, JUN, MMP3, NCF1, NCF2, NRCAM, PRDM1, PREX1, PTGS2, RAPGEF3, RELB, SOCS3, THBS1, TNFAIP3, TUBAL3	1.15547
	Resisting cell death	gsea_hallmarks.gmt	47/1941	0.0255987	0.0365695	1.41426	5.18356	BCL2L1, BCL2L2-PABPN1, BMP2, BMP6, CSF3, CXCL1, CXCL2, CXCL3, DHRS2, EDN1, EPHA2, FST, GREM1, HBEGF, ID1, ID2, ID4, IFI6, IFNK, IL11, IL1A, IL1B, INHBA, ITGB3, JUN, MMP3, MAPK8IP2, NGF, NFKBIE, NOG, NR4A1, OSR1, PIK3AP1, PPP2R2C, PRDM1, PTGS2, RELB, RELN, SERPINB2, SH2D2A, SOCS1, SOCS3, SPHK1, TGFA, THBS1, TNFAIP3, TUBAL3	0.977993
	Reprogramming energy metabolism	gsea_hallmarks.gmt	6/740	0.993742	0.999534	0.461182	0.00289501	ADAM8, AQP3, EDN1, PPP2R2C, PTGS2, SLC16A2	0.327479
	Replicative immortality	gsea_hallmarks.gmt	22/547	0.000462154	0.00154051	2.40815	18.4936	APC2, BMP2, BMP6, CSF3, CXCL3, ETS1, F3, FOSB, FOSL1, FST, FZD8, FZD9, ID1, ID2, ID4, INHBA, JUN, NGF, NOG, SPHK1, THBS1, WNT10B	1.62442
Hallmarks and genes marked in bold are significantly enriched (p < 0.05)
