# Supplementary material for: Endo180 and basement membrane stiffness induce OXPHOS and neoplasia in aging prostate epithelia
Source: Research Square preprint supplement (doi:10.21203/rs.3.rs-4837876/v1), 2024-09-19
Supplement: Supplementary file 8 [file b26dd0f84e3dfac0d435a118.xlsx]

## Sheet: UP (stiff vs native)
Supplementary data 2. GO terms in Wt-acini in stiff-BM versus native-BM
Source	Term name	Term ID	Adjusted p value	Negative log10 adjusted p value	Term size	Query size	Intersection size	Effective domain size	Intersections
GO:MF	NADH dehydrogenase (ubiquinone) activity	GO:0008137	1.14485e-13	12.9413	43	13	7	20166	MT-ND2, MT-ND4L, MT-ND6, MT-ND4, MT-ND1, MT-ND5, MT-ND3
	NADH dehydrogenase (quinone) activity	GO:0050136	1.36109e-13	12.8661	44	13	7	20166	MT-ND2, MT-ND4L, MT-ND6, MT-ND4, MT-ND1, MT-ND5, MT-ND3
	NADH dehydrogenase activity	GO:0003954	1.90012e-13	12.7212	46	13	7	20166	MT-ND2, MT-ND4L, MT-ND6, MT-ND4, MT-ND1, MT-ND5, MT-ND3
	NAD(P)H dehydrogenase (quinone) activity	GO:0003955	1.90012e-13	12.7212	46	13	7	20166	MT-ND2, MT-ND4L, MT-ND6, MT-ND4, MT-ND1, MT-ND5, MT-ND3
	oxidoreduction-driven active transmembrane transporter activity	GO:0015453	3.75514e-13	12.4254	71	18	8	20166	MT-ND2, MT-ND4L, MT-ND6, MT-ND4, MT-ND1, MT-ND5, MT-ND3, MT-CO2
	oxidoreductase activity, acting on NAD(P)H, quinone or similar compound as acceptor	GO:0016655	1.06405e-12	11.973	58	13	7	20166	MT-ND2, MT-ND4L, MT-ND6, MT-ND4, MT-ND1, MT-ND5, MT-ND3
	primary active transmembrane transporter activity	GO:0015399	2.55017e-11	10.5934	180	20	9	20166	MT-ND2, MT-ND4L, MT-ND6, MT-ND4, MT-ND1, MT-ND5, MT-ND3, MT-CO2, ATP8A1
	oxidoreductase activity, acting on NAD(P)H	GO:0016651	2.83979e-11	10.5467	91	13	7	20166	MT-ND2, MT-ND4L, MT-ND6, MT-ND4, MT-ND1, MT-ND5, MT-ND3
	electron transfer activity	GO:0009055	4.05333e-11	10.3922	125	18	8	20166	MT-ND2, MT-ND4L, MT-ND6, MT-ND4, MT-ND1, MT-ND5, MT-ND3, MT-CO2
	active transmembrane transporter activity	GO:0022804	3.6135e-08	7.44207	403	20	9	20166	MT-ND2, MT-ND4L, MT-ND6, MT-ND4, MT-ND1, MT-ND5, MT-ND3, MT-CO2, ATP8A1
	transmembrane transporter activity	GO:0022857	8.85601e-07	6.05276	1121	20	11	20166	MT-ATP8, MT-ND2, MT-ATP6, MT-ND4L, MT-ND6, MT-ND4, MT-ND1, MT-ND5, MT-ND3, MT-CO2, ATP8A1
	transporter activity	GO:0005215	2.50003e-06	5.60206	1237	20	11	20166	MT-ATP8, MT-ND2, MT-ATP6, MT-ND4L, MT-ND6, MT-ND4, MT-ND1, MT-ND5, MT-ND3, MT-CO2, ATP8A1
	DNA-binding transcription factor activity, RNA polymerase II-specific	GO:0000981	5.98583e-05	4.22288	1360	196	35	20166	ZNF117, ZNF429, ZNF20, ZNF546, TBX2, ZNF713, ZNF112, ZBTB16, SALL4, ZNF14, ZNF658, ZNF91, ZNF138, ZNF107, ZNF605, ZFP14, ETV1, ZNF280D, ZNF285, ZNF836, ZNF253, ZNF724, ZNF273, DMRTA1, TFCP2L1, ZBTB41, CARF, ZNF350, ZNF606, ZNF443, ZFP37, ZNF260, ZNF292, ZNF248, ZNF484
	oxidoreductase activity	GO:0016491	6.62086e-05	4.17909	756	18	8	20166	MT-ND2, MT-ND4L, MT-ND6, MT-ND4, MT-ND1, MT-ND5, MT-ND3, MT-CO2
	RNA polymerase II cis-regulatory region sequence-specific DNA binding	GO:0000978	0.000114307	3.94193	1187	115	23	20166	ZNF117, ZNF429, ZNF546, TBX2, ZNF713, ZNF112, ZBTB16, SALL4, ZNF658, ZNF91, ZNF138, ZNF107, ZNF605, ZFP14, ETV1, ZNF280D, ZNF285, ZNF836, ZNF253, ZNF724, ZNF273, DMRTA1, TFCP2L1
	RNA polymerase II transcription regulatory region sequence-specific DNA binding	GO:0000977	0.000142267	3.84689	1399	115	25	20166	ZNF117, ZNF429, ZNF20, ZNF546, TBX2, ZNF713, ZNF112, ZBTB16, SALL4, ZNF14, ZNF658, ZNF91, ZNF138, ZNF107, ZNF605, ZFP14, ETV1, ZNF280D, ZNF285, ZNF836, ZNF253, ZNF724, ZNF273, DMRTA1, TFCP2L1
	cis-regulatory region sequence-specific DNA binding	GO:0000987	0.000151462	3.8197	1206	115	23	20166	ZNF117, ZNF429, ZNF546, TBX2, ZNF713, ZNF112, ZBTB16, SALL4, ZNF658, ZNF91, ZNF138, ZNF107, ZNF605, ZFP14, ETV1, ZNF280D, ZNF285, ZNF836, ZNF253, ZNF724, ZNF273, DMRTA1, TFCP2L1
	DNA-binding transcription factor activity	GO:0003700	0.000160275	3.79513	1417	196	35	20166	ZNF117, ZNF429, ZNF20, ZNF546, TBX2, ZNF713, ZNF112, ZBTB16, SALL4, ZNF14, ZNF658, ZNF91, ZNF138, ZNF107, ZNF605, ZFP14, ETV1, ZNF280D, ZNF285, ZNF836, ZNF253, ZNF724, ZNF273, DMRTA1, TFCP2L1, ZBTB41, CARF, ZNF350, ZNF606, ZNF443, ZFP37, ZNF260, ZNF292, ZNF248, ZNF484
	transcription cis-regulatory region binding	GO:0000976	0.000477503	3.32102	1493	115	25	20166	ZNF117, ZNF429, ZNF20, ZNF546, TBX2, ZNF713, ZNF112, ZBTB16, SALL4, ZNF14, ZNF658, ZNF91, ZNF138, ZNF107, ZNF605, ZFP14, ETV1, ZNF280D, ZNF285, ZNF836, ZNF253, ZNF724, ZNF273, DMRTA1,TFCP2L1, ZBTB41, CARF, ZNF350, ZNF606, ZNF443, ZFP37, ZNF260, ZNF292, ZNF248, ZNF484
	transcription regulatory region nucleic acid binding	GO:0001067	0.000489397	3.31034	1495	115	25	20166	ZNF117, ZNF429, ZNF20, ZNF546, TBX2, ZNF713, ZNF112, ZBTB16, SALL4, ZNF14, ZNF658, ZNF91, ZNF138, ZNF107, ZNF605, ZFP14, ETV1, ZNF280D, ZNF285, ZNF836, ZNF253, ZNF724, ZNF273, DMRTA1, TFCP2L1, ZBTB41, CARF, ZNF350, ZNF606, ZNF443, ZFP37, ZNF260, ZNF292, ZNF248, ZNF484
	double-stranded DNA binding	GO:0003690	0.000670821	3.17339	1644	196	37	20166	ZNF117, ZNF429, ZNF20, ZNF546, TBX2, ZNF713, ZNF112, ZBTB16, SALL4, ZNF14, ZNF658, ZNF91, ZNF138, ZNF107, ZNF605, ZFP14, ETV1, ZNF280D, ZNF285, ZNF836, ZNF253, ZNF724, ZNF273, DMRTA1, TFCP2L1, ZBTB41, CARF, ZNF350, ZNF606, RAD51AP1, ZNF443, ZFP37, ZNF260, MND1, ZNF248, ARID4A, ZNF484
	sequence-specific DNA binding	GO:0043565	0.000884212	3.05344	1652	115	26	20166	ZNF117, ZNF429, ZNF20, ZNF546, TBX2, ZNF713, ZNF112, ZBTB16, SALL4, ZNF14, ZNF658, ZNF91, ZNF138, ZNF107, CXXC5, ZNF605, ZFP14, ETV1, ZNF280D, ZNF285, ZNF836, ZNF253, ZNF724, ZNF273, DMRTA1, TFCP2L1
	sequence-specific double-stranded DNA binding	GO:1990837	0.000924032	3.03431	1548	115	25	20166	ZNF117, ZNF429, ZNF20, ZNF546, TBX2, ZNF713, ZNF112, ZBTB16, SALL4, ZNF14, ZNF658, ZNF91, ZNF138, ZNF107, ZNF605, ZFP14, ETV1, ZNF280D, ZNF285, ZNF836, ZNF253, ZNF724, ZNF273, DMRTA1, TFCP2L1
	transcription regulator activity	GO:0140110	0.00638775	2.19465	1917	144	31	20166	ZNF117, ZNF429, ZNF20, ZNF546, WNT3A, TBX2, ZNF713, ZNF112, ZBTB16, SALL4, ZNF14, ZNF658, ZNF91, ZNF138, ZNF107, ZNF605, ZFP14, ETV1, ZNF280D, ZNF285, ZNF836, ZNF253, ZNF724, ZNF273, DMRTA1, TFCP2L1, SFMBT2, ZBTB41, MAML2, CARF, ZNF350
	proton-transporting ATP synthase activity, rotational mechanism	GO:0046933	0.00787178	2.10393	17	7	2	20166	MT-ATP8, MT-ATP6
	cytochrome-c oxidase activity	GO:0004129	0.0131062	1.88252	18	195	4	20166	COX7B, MT-CO1, MT-CO2, MT-CO3
	DNA binding	GO:0003677	0.0143194	1.84408	2494	196	45	20166	AKAP9, ARID4A, ATM, CARF, CXXC5, DMRTA1, ETV1, FANCM, H2AC15, MLLT3, MND1, RAD51AP1, RPS27, SALL4, TBX2, TFCP2L1, ZBTB16, ZBTB41, ZFP14, ZFP37, ZNF107, ZNF112, ZNF117, ZNF138, ZNF14, ZNF20, ZNF248, ZNF253, ZNF260, ZNF273, ZNF280D, ZNF285, ZNF292, ZNF350, ZNF429, ZNF443, ZNF484, ZNF546, ZNF605, ZNF606, ZNF658, ZNF713, ZNF724, ZNF836, ZNF91
	proton channel activity	GO:0015252	0.0159566	1.79706	24	7	2	20166	MT-ATP8, MT-ATP6
	oxidoreductase activity, acting on a heme group of donors	GO:0016675	0.0164759	1.78315	19	195	4	20166	COX7B, MT-CO1, MT-CO2, MT-CO3
GO:BP	oxidative phosphorylation	GO:0006119	1.14811e-14	13.94	142	18	10	21029	MT-ATP6, MT-ATP8, MT-CO2, MT-ND1, MT-ND2, MT-ND3, MT-ND4, MT-ND4L, MT-ND5, MT-ND6
	aerobic respiration	GO:0009060	2.51099e-13	12.6002	192	18	10	21029	MT-ATP6, MT-ATP8, MT-CO2, MT-ND1, MT-ND2, MT-ND3, MT-ND4, MT-ND4L, MT-ND5, MT-ND6
	mitochondrial electron transport, NADH to ubiquinone	GO:0006120	1.0483e-12	11.9795	51	13	7	21029	MT-ND1, MT-ND2, MT-ND3, MT-ND4, MT-ND4L, MT-ND5, MT-ND6
	cellular respiration	GO:0045333	2.03634e-12	11.6912	236	18	10	21029	MT-ATP6, MT-ATP8, MT-CO2, MT-ND1, MT-ND2, MT-ND3, MT-ND4, MT-ND4L, MT-ND5, MT-ND6
	aerobic electron transport chain	GO:0019646	5.02035e-12	11.2993	87	18	8	21029	MT-CO2, MT-ND1, MT-ND2, MT-ND3, MT-ND4, MT-ND4L, MT-ND5, MT-ND6
	ATP metabolic process	GO:0046034	9.88683e-12	11.0049	276	18	10	21029	MT-ATP6, MT-ATP8, MT-CO2, MT-ND1, MT-ND2, MT-ND3, MT-ND4, MT-ND4L, MT-ND5, MT-ND6
	mitochondrial ATP synthesis coupled electron transport	GO:0042775	1.04077e-11	10.9826	95	18	8	21029	MT-CO2, MT-ND1, MT-ND2, MT-ND3, MT-ND4, MT-ND4L, MT-ND5, MT-ND6
	ATP synthesis coupled electron transport	GO:0042773	1.04077e-11	10.9826	95	18	8	21029	MT-CO2, MT-ND1, MT-ND2, MT-ND3, MT-ND4, MT-ND4L, MT-ND5, MT-ND6
	respiratory electron transport chain	GO:0022904	5.02175e-11	10.2991	115	18	8	21029	MT-CO2, MT-ND1, MT-ND2, MT-ND3, MT-ND4, MT-ND4L, MT-ND5, MT-ND6
	energy derivation by oxidation of organic compounds	GO:0015980	5.10805e-11	10.2917	325	18	10	21029	MT-ATP6, MT-ATP8, MT-CO2, MT-ND1, MT-ND2, MT-ND3, MT-ND4, MT-ND4L, MT-ND5, MT-ND6
	electron transport chain	GO:0022900	1.60744e-09	8.79387	176	18	8	21029	MT-CO2, MT-ND1, MT-ND2, MT-ND3, MT-ND4, MT-ND4L, MT-ND5, MT-ND6
	generation of precursor metabolites and energy	GO:0006091	2.80704e-09	8.55175	499	13	9	21029	MT-ATP6, MT-ATP8, MT-ND1, MT-ND2, MT-ND3, MT-ND4, MT-ND4L, MT-ND5, MT-ND6
	NADH dehydrogenase complex assembly	GO:0010257	2.19294e-07	6.65897	59	12	5	21029	MT-ND1, MT-ND2, MT-ND4, MT-ND5, MT-ND6
	mitochondrial respiratory chain complex I assembly	GO:0032981	2.19294e-07	6.65897	59	12	5	21029	MT-ND1, MT-ND2, MT-ND4, MT-ND5, MT-ND6
	mitochondrial respiratory chain complex assembly	GO:0033108	2.51268e-06	5.59986	95	12	5	21029	MT-ND1, MT-ND2, MT-ND4, MT-ND5, MT-ND6
	proton transmembrane transport	GO:1902600	0.000310966	3.50729	155	18	5	21029	MT-ATP6, MT-ATP8, MT-CO2, MT-ND4, MT-ND5
	energy coupled proton transmembrane transport, against electrochemical gradient	GO:0015988	0.00344215	2.46317	4	12	2	21029	MT-ND4, MT-ND5
	electron transport coupled proton transport	GO:0015990	0.00344215	2.46317	4	12	2	21029	MT-ND4, MT-ND5
	regulation of transcription by RNA polymerase II	GO:0006357	0.0105828	1.9754	2529	196	46	21029	ARID4A, ATM, BMP7, CARF, CXXC5, DMRTA1, ETV1, FRK, MAML2, SALL4, TBX2, TFCP2L1, TRPV4, TSC22D3, WNT3A, WNT5A, ZBTB16, ZBTB41, ZFP14, ZFP37, ZNF107, ZNF112, ZNF117, ZNF138, ZNF14, ZNF20, ZNF248, ZNF253, ZNF260, ZNF273, ZNF280D, ZNF285, ZNF292, ZNF350, ZNF429, ZNF443, ZNF484, ZNF546, ZNF605, ZNF606, ZNF608, ZNF658, ZNF713, ZNF724, ZNF836, ZNF91
	mitochondrion organization	GO:0007005	0.0108837	1.96322	510	12	5	21029	MT-ND1, MT-ND2, MT-ND4, MT-ND5, MT-ND6
	embryonic limb morphogenesis	GO:0030326	0.0127453	1.89465	122	79	6	21029	BMP7, SALL4, TBC1D32, TBX2, TGFB2, ZBTB16
	embryonic appendage morphogenesis	GO:0035113	0.0127453	1.89465	122	79	6	21029	BMP7, SALL4, TBC1D32, TBX2, TGFB2, ZBTB16
	ATP biosynthetic process	GO:0006754	0.0258368	1.58776	55	18	3	21029	MT-ATP6, MT-ATP8, MT-CO2
	negative regulation of morphogenesis of an epithelium	GO:1905331	0.0297065	1.52715	8	139	3	21029	BMP7, TBX2, WNT5A
	transcription by RNA polymerase II	GO:0006366	0.0307121	1.51269	2634	196	46	21029	ARID4A, ATM, BMP7, CARF, CXXC5, DMRTA1, ETV1, FRK, MAML2, SALL4, TBX2, TFCP2L1, TRPV4, TSC22D3, WNT3A, WNT5A, ZBTB16, ZBTB41, ZFP14, ZFP37, ZNF107, ZNF112, ZNF117, ZNF138, ZNF14, ZNF20, ZNF248, ZNF253, ZNF260, ZNF273, ZNF280D, ZNF285, ZNF292, ZNF350, ZNF429, ZNF443, ZNF484, ZNF546, ZNF605, ZNF606, ZNF608, ZNF658, ZNF713, ZNF724, ZNF836, ZNF91
	mitochondrial ATP synthesis coupled proton transport	GO:0042776	0.0311498	1.50655	19	7	2	21029	MT-ATP6, MT-ATP8
	cardioblast differentiation	GO:0010002	0.0321504	1.49281	20	53	3	21029	TBX2, TGFB2, WNT3A
	limb morphogenesis	GO:0035108	0.0342315	1.46557	145	79	6	21029	BMP7, SALL4, TBC1D32, TBX2, TGFB2, ZBTB16
	appendage morphogenesis	GO:0035107	0.0342315	1.46557	145	79	6	21029	BMP7, SALL4, TBC1D32, TBX2, TGFB2, ZBTB16
	purine ribonucleoside triphosphate biosynthetic process	GO:0009206	0.0448008	1.34871	66	18	3	21029	MT-ATP6, MT-ATP8, MT-CO2
	purine nucleoside triphosphate biosynthetic process	GO:0009145	0.0468758	1.32905	67	18	3	21029	MT-ATP6, MT-ATP8, MT-CO2
GO:CC	inner mitochondrial membrane protein complex	GO:0098800	2.16589e-12	11.6644	154	13	8	21672	MT-ATP8, MT-ND2, MT-ATP6, MT-ND4L, MT-ND4, MT-ND1, MT-ND5, MT-ND3
	respirasome	GO:0070469	2.66057e-12	11.575	103	18	8	21672	MT-ND2, MT-ND4L, MT-ND6, MT-ND4, MT-ND1, MT-ND5, MT-ND3, MT-CO2
	respiratory chain complex	GO:0098803	3.63508e-11	10.4395	93	195	14	21672	MT-ND2, MT-ND4L, MT-ND4, MT-ND1, MT-ND5, MT-ND3, MT-CO2, MT-CYB, NDUFB1, NDUFA1, MT-CO3, COX7C, COX7B, MT-CO1
	mitochondrial respiratory chain complex I	GO:0005747	7.68795e-11	10.1142	52	13	6	21672	MT-ND2, MT-ND4L, MT-ND4, MT-ND1, MT-ND5, MT-ND3
	NADH dehydrogenase complex	GO:0030964	7.68795e-11	10.1142	52	13	6	21672	MT-ND2, MT-ND4L, MT-ND4, MT-ND1, MT-ND5, MT-ND3
	respiratory chain complex I	GO:0045271	7.68795e-11	10.1142	52	13	6	21672	MT-ND2, MT-ND4L, MT-ND4, MT-ND1, MT-ND5, MT-ND3
	mitochondrial protein-containing complex	GO:0098798	2.51324e-10	9.59977	277	13	8	21672	MT-ATP8, MT-ND2, MT-ATP6, MT-ND4L, MT-ND4, MT-ND1, MT-ND5, MT-ND3
	mitochondrial inner membrane	GO:0005743	3.64142e-10	9.43873	500	13	9	21672	MT-ATP8, MT-ND2, MT-ATP6, MT-ND4L, MT-ND6, MT-ND4, MT-ND1, MT-ND5, MT-ND3
	organelle inner membrane	GO:0019866	1.04012e-09	8.98292	562	13	9	21672	MT-ATP8, MT-ND2, MT-ATP6, MT-ND4L, MT-ND6, MT-ND4, MT-ND1, MT-ND5, MT-ND3
	mitochondrial respirasome	GO:0005746	2.84588e-09	8.54578	93	13	6	21672	MT-ND2, MT-ND4L, MT-ND4, MT-ND1, MT-ND5, MT-ND3
	oxidoreductase complex	GO:1990204	1.10076e-08	7.95831	116	13	6	21672	MT-ND2, MT-ND4L, MT-ND4, MT-ND1, MT-ND5, MT-ND3
	mitochondrial membrane	GO:0031966	1.29478e-08	7.8878	745	13	9	21672	MT-ATP8, MT-ND2, MT-ATP6, MT-ND4L, MT-ND6, MT-ND4, MT-ND1, MT-ND5, MT-ND3
	mitochondrial envelope	GO:0005740	2.3365e-08	7.63143	796	13	9	21672	MT-ATP8, MT-ND2, MT-ATP6, MT-ND4L, MT-ND6, MT-ND4, MT-ND1, MT-ND5, MT-ND3
	organelle envelope	GO:0031967	1.23088e-06	5.90979	1245	13	9	21672	MT-ATP8, MT-ND2, MT-ATP6, MT-ND4L, MT-ND6, MT-ND4, MT-ND1, MT-ND5, MT-ND3
	envelope	GO:0031975	1.23088e-06	5.90979	1245	13	9	21672	MT-ATP8, MT-ND2, MT-ATP6, MT-ND4L, MT-ND6, MT-ND4, MT-ND1, MT-ND5, MT-ND3
	transporter complex	GO:1990351	1.32832e-05	4.8767	397	20	7	21672	MT-ND2, MT-ND4L, MT-ND4, MT-ND1, MT-ND5, MT-ND3, ATP8A1
	transmembrane transporter complex	GO:1902495	1.42886e-05	4.84501	382	13	6	21672	MT-ND2, MT-ND4L, MT-ND4, MT-ND1, MT-ND5, MT-ND3
	mitochondrion	GO:0005739	1.65135e-05	4.78216	1674	13	9	21672	MT-ATP8, MT-ND2, MT-ATP6, MT-ND4L, MT-ND6, MT-ND4, MT-ND1, MT-ND5, MT-ND3
	membrane protein complex	GO:0098796	5.91275e-05	4.22821	1323	13	8	21672	MT-ATP8, MT-ND2, MT-ATP6, MT-ND4L, MT-ND4, MT-ND1, MT-ND5, MT-ND3
	cytochrome complex	GO:0070069	0.000544814	3.26375	41	195	6	21672	MT-CO2, MT-CYB, MT-CO3, COX7C, COX7B, MT-CO1
	respiratory chain complex IV	GO:0045277	0.00123414	2.90863	27	195	5	21672	MT-CO2, MT-CO3, COX7C, COX7B, MT-CO1
	proton-transporting ATP synthase complex, coupling factor F(o)	GO:0045263	0.00388914	2.41015	17	7	2	21672	MT-ATP8, MT-ATP6
	mitochondrial proton-transporting ATP synthase complex	GO:0005753	0.00722826	2.14097	23	7	2	21672	MT-ATP8, MT-ATP6
	proton-transporting ATP synthase complex	GO:0045259	0.00856843	2.0671	25	7	2	21672	MT-ATP8, MT-ATP6
	proton-transporting two-sector ATPase complex, proton-transporting domain	GO:0033177	0.010022	1.99905	27	7	2	21672	MT-ATP8, MT-ATP6
	catalytic complex	GO:1902494	0.029302	1.5331	1424	13	6	21672	MT-ND2, MT-ND4L, MT-ND4, MT-ND1, MT-ND5, MT-ND3
	proton-transporting two-sector ATPase complex	GO:0016469	0.0406894	1.39052	54	7	2	21672	MT-ATP8, MT-ATP6
KEGG	Oxidative phosphorylation	KEGG:00190	3.99766e-12	11.3982	134	18	10	8014	MT-ATP8, MT-ND2, MT-ATP6, MT-ND4L, MT-ND6, MT-ND4, MT-ND1, MT-ND5, MT-ND3, MT-CO2
	Diabetic cardiomyopathy	KEGG:05415	9.04157e-11	10.0438	203	28	12	8014	MT-ATP8, MT-ND2, MT-ATP6, MT-ND4L, MT-ND6, MT-ND4, MT-ND1, MT-ND5, MT-ND3, MT-CO2, PDK4, CAMK2B
	Chemical carcinogenesis - reactive oxygen species	KEGG:05208	4.4648e-10	9.3502	222	13	9	8014	MT-ATP8, MT-ND2, MT-ATP6, MT-ND4L, MT-ND6, MT-ND4, MT-ND1, MT-ND5, MT-ND3
	Thermogenesis	KEGG:04714	6.65472e-10	9.17687	232	13	9	8014	MT-ATP8, MT-ND2, MT-ATP6, MT-ND4L, MT-ND6, MT-ND4, MT-ND1, MT-ND5, MT-ND3
	Parkinson disease	KEGG:05012	2.22701e-09	8.65228	266	28	12	8014	MT-ATP8, MT-ND2, MT-ATP6, MT-ND4L, MT-ND6, MT-ND4, MT-ND1, MT-ND5, MT-ND3, MT-CO2, SEM1, CAMK2B
	Prion disease	KEGG:05020	2.7988e-09	8.55303	272	13	9	8014	MT-ATP8, MT-ND2, MT-ATP6, MT-ND4L, MT-ND6, MT-ND4, MT-ND1, MT-ND5, MT-ND3
	Huntington disease	KEGG:05016	8.07253e-09	8.09299	306	13	9	8014	MT-ATP8, MT-ND2, MT-ATP6, MT-ND4L, MT-ND6, MT-ND4, MT-ND1, MT-ND5, MT-ND3
	Amyotrophic lateral sclerosis	KEGG:05014	3.63576e-08	7.4394	362	13	9	8014	MT-ATP8, MT-ND2, MT-ATP6, MT-ND4L, MT-ND6, MT-ND4, MT-ND1, MT-ND5, MT-ND3
	Alzheimer disease	KEGG:05010	5.2946e-08	7.27617	383	26	12	8014	MT-ATP8, MT-ND2, MT-ATP6, MT-ND4L, MT-ND6, MT-ND4, MT-ND1, MT-ND5, MT-ND3, MT-CO2, SEM1, WNT3A
	Retrograde endocannabinoid signaling	KEGG:04723	8.35605e-08	7.078	148	13	7	8014	MT-ND2, MT-ND4L, MT-ND6, MT-ND4, MT-ND1, MT-ND5, MT-ND3
	Pathways of neurodegeneration - multiple diseases	KEGG:05022	1.31383e-07	6.88146	475	28	13	8014	MT-ATP8, MT-ND2, MT-ATP6, MT-ND4L, MT-ND6, MT-ND4, MT-ND1, MT-ND5, MT-ND3, MT-CO2, SEM1, WNT3A, CAMK2B
	Metabolic pathways	KEGG:01100	0.00920485	2.03598	1526	13	9	8014	MT-ATP8, MT-ND2, MT-ATP6, MT-ND4L, MT-ND6, MT-ND4, MT-ND1, MT-ND5, MT-ND3
REAC	Respiratory electron transport, ATP synthesis by chemiosmotic coupling, and heat production by uncoupling proteins.	REAC:R-HSA-163200	6.18346e-11	10.2088	127	18	9	10760	MT-ATP8,MT-ND2,MT-ATP6,MT-ND6,MT-ND4,MT-ND1,MT-ND5,MT-ND3,MT-CO2
	The citric acid (TCA) cycle and respiratory electron transport	REAC:R-HSA-1428517	7.53089e-10	9.12315	177	24	10	10760	MT-ATP8,MT-ND2,MT-ATP6,MT-ND6,MT-ND4,MT-ND1,MT-ND5,MT-ND3,MT-CO2,PDK4
	Complex I biogenesis	REAC:R-HSA-6799198	1.17153e-08	7.93125	57	13	6	10760	MT-ND2,MT-ND6,MT-ND4,MT-ND1,MT-ND5,MT-ND3
	Respiratory electron transport	REAC:R-HSA-611105	7.28853e-08	7.13736	103	18	7	10760	MT-ND2,MT-ND6,MT-ND4,MT-ND1,MT-ND5,MT-ND3,MT-CO2
	Formation of ATP by chemiosmotic coupling	REAC:R-HSA-163210	0.023014	1.63801	18	7	2	10760	MT-ATP8, MT-ATP6
WP	Electron transport chain: OXPHOS system in mitochondria	WP:WP111	6.89167e-13	12.1617	105	18	10	7806	MT-ATP8,MT-ND2,MT-ATP6,MT-ND4L,MT-ND6,MT-ND4,MT-ND1,MT-ND5,MT-ND3,MT-CO2
	Oxidative phosphorylation	WP:WP623	1.70117e-12	11.7693	62	13	8	7806	MT-ND2,MT-ATP6,MT-ND4L,MT-ND6,MT-ND4,MT-ND1,MT-ND5,MT-ND3
	Mitochondrial complex I assembly model OXPHOS system	WP:WP4324	1.27128e-08	7.89576	56	12	6	7806	MT-ND2,MT-ND4L,MT-ND6,MT-ND4,MT-ND1,MT-ND5
	Mitochondrial complex IV assembly	WP:WP4922	0.0274122	1.56206	35	195	6	7806	MT-CO2,MT-CO3, PET100, COX7C, COX7B, MT-CO1

## Sheet: DN (stiff vs native)
Supplementary data 2. GO terms in Wt-acini in stiff-BM versus native-BM
Source	Term name	Term ID	Adjusted p value	Negative log10 adjusted p value	Term size	Query size	Intersection size	Effective domain size	Intersections
GO:MF	cytokine activity	GO:0005125	2.19521e-06	5.65852	235	85	11	20166	CXCL1,IL24,IL6,CSF3,IL1B,CXCL8,CSF2,CXCL2,IL32,IL11,CXCL3
	signaling receptor regulator activity	GO:0030545	0.000141885	3.84806	548	95	14	20166	CXCL1,IL24,IL6,CSF3,IL1B,CXCL8,CSF2,CXCL2,IL32,FST,IL11,CXCL3,PTHLH,SEMA7A
	receptor ligand activity	GO:0048018	0.000288577	3.53974	495	95	13	20166	CXCL1,IL24,IL6,CSF3,IL1B,CXCL8,CSF2,CXCL2,IL32,IL11,CXCL3,PTHLH,SEMA7A
	signaling receptor activator activity	GO:0030546	0.000337964	3.47113	502	95	13	20166	CXCL1,IL24,IL6,CSF3,IL1B,CXCL8,CSF2,CXCL2,IL32,IL11,CXCL3,PTHLH,SEMA7A
	CXCR chemokine receptor binding	GO:0045236	0.000443199	3.3534	18	85	4	20166	CXCL1,CXCL8,CXCL2,CXCL3
	growth factor receptor binding	GO:0070851	0.000630492	3.20032	140	113	8	20166	ESM1,IL6,CSF3,IL1B,CSF2,IL11,ECM1,TGFA
	cytokine receptor binding	GO:0005126	0.000929029	3.03197	276	105	10	20166	CXCL1,IL6,CSF3,IL1B,CXCL8,CSF2,CXCL2,IL11,CXCL3,ECM1
	molecular function regulator	GO:0098772	0.00138316	2.85913	1962	113	28	20166	CXCL1,IL24,IL6,TBXA2R,ID2,PI3,CSF3,IGFBP3,ID4,SRPINB2,PPP2R2C,IL1B,CXCL8,CALML5,CSF2,SNCB,CXCL2,RGS16,IL32,NCF2,FST,IL11,CXCL3,PTHLH,SEMA7A,ID1,A2ML1,TGFA
	protein tyrosine/threonine phosphatase activity	GO:0008330	0.0146092	1.83537	10	127	3	20166	DUSP2,DUSP4,DUSP5
	chemokine activity	GO:0008009	0.0300995	1.52144	50	85	4	20166	CXCL1,CXCL8,CXCL2,CXCL3
	MAP kinase tyrosine/serine/threonine phosphatase activity	GO:0017017	0.03434	1.4642	13	127	3	20166	DUSP2,DUSP4,DUSP5
GO:BP	cellular response to lipopolysaccharide	GO:0071222	7.2642e-08	7.13881	207	85	12	21029	CXCL1,IL24,IL6,TBXA2R,CMPK2,CSF3,IL1B,CXCL8,CSF2,TNFAIP3,CXCL2,CXCL3
	cellular response to molecule of bacterial origin	GO:0071219	1.17466e-07	6.93009	216	66	11	21029	CXCL1,IL24,IL6,TBXA2R,CMPK2,CSF3,IL1B,CXCL8,CSF2,TNFAIP3,CXCL2
	cell population proliferation	GO:0008283	3.2715e-07	6.48525	1940	140	39	21029	ESM1,CXCL1,IL24,IL6,ID2,CSF3,IGFBP3,ID4,IL1B,CXCL8,MSX1,CSF2,TNFAIP3,NPR1,HES5,FST,DHRS2,IL11,SLC16A2,PTHLH,SULT2B1,EHF,FOSL1,ECM1,ID1,SPHK1,OVOL1,TGM1,TGFA,LGALS7B,FOXC2,KRT6A,PTGES,SH2D2A,NOS3,MSX2,SDCBP2,FZD9,ODC1
	epidermis development	GO:0008544	4.03952e-07	6.39367	347	143	17	21029	LCE3D,SPRR2D,CALML5,IVL,HES5,ZBED2,FST,PTHLH,SULT2B1,SPRR1B,SNAI1,OVOL1,TGM1,KRT6A,MSX2,MAFF,KLF7
	tissue development	GO:0009888	4.24989e-07	6.37162	1912	143	39	21029	LCE3D,J3QL48,IL6,ID2,SPRR2D,ID4,KRT6B,IL1B,CALML5,MSX1,IVL,DUSP2,HES5,ZBED2,DUSP4,FOXF2,FST,DLX2,PTHLH,SULT2B1,SEMA7A,SPRR1B,EHF,ECM1,ID1,SNAI1,OVOL1,TGM1,CARMIL2,FOXC2,KRT6A,DUSP5,RAPGEF3,NOS3,MSX2,FZD9,MAFF,FOXD1,KLF7
	cellular response to biotic stimulus	GO:0071216	4.3244e-07	6.36407	244	66	11	21029	CXCL1,IL24,IL6,TBXA2R,CMPK2,CSF3,IL1B,CXCL8,CSF2,TNFAIP3,CXCL2
	regulation of cell population proliferation	GO:0042127	3.41098e-06	5.46712	1648	140	34	21029	ESM1,CXCL1,IL24,IL6,ID2,CSF3,IGFBP3,ID4,IL1B,CXCL8,MSX1,CSF2,TNFAIP3,NPR1,HES5,DHRS2,IL11,SLC16A2,PTHLH,SULT2B1,FOSL1,ECM1,ID1,SPHK1,OVOL1,TGM1,TGFA,LGALS7B,KRT6A,PTGES,NOS3,MSX2,FZD9,ODC1
	epidermal cell differentiation	GO:0009913	5.03439e-06	5.29805	216	143	13	21029	LCE3D,SPRR2D,IVL,HES5,ZBED2,SULT2B1,SPRR1B,OVOL1,TGM1,KRT6A,MSX2,MAFF,KLF7
	response to lipopolysaccharide	GO:0032496	9.29216e-06	5.03188	328	51	10	21029	CXCL1,IL24,IL6,TBXA2R,CMPK2,CSF3,IL1B,CXCL8,CSF2,TNFAIP3
	cellular response to lipid	GO:0071396	1.58097e-05	4.80108	575	85	15	21029	CXCL1,IL24,IL6,TBXA2R,CMPK2,CSF3,IL1B,CXCL8,CSF2,TNFAIP3,CYP24A1,H3BTX0,CXCL2,GRAMD1B,CXCL3
	response to molecule of bacterial origin	GO:0002237	1.58934e-05	4.79878	347	51	10	21029	CXCL1,IL24,IL6,TBXA2R,CMPK2,CSF3,IL1B,CXCL8,CSF2,TNFAIP3
	epithelium development	GO:0060429	2.94037e-05	4.5316	1160	143	27	21029	LCE3D,J3QL48,ID2,SPRR2D,ID4,IL1B,MSX1,IVL,HES5,ZBED2,FOXF2,FST,SULT2B1,SPRR1B,EHF,ID1,SNAI1,OVOL1,TGM1,CARMIL2,FOXC2,KRT6A,RAPGEF3,MSX2,MAFF,FOXD1,KLF7
	epithelial cell differentiation	GO:0030855	0.000160084	3.79565	650	143	19	21029	LCE3D,ID2,SPRR2D,IL1B,IVL,HES5,ZBED2,SULT2B1,SPRR1B,EHF,ID1,OVOL1,TGM1,FOXC2,KRT6A,RAPGEF3,MSX2,MAFF,KLF7
	negative regulation of cell population proliferation	GO:0008285	0.000182308	3.73919	707	133	19	21029	CXCL1,IL24,IL6,IGFBP3,IL1B,CXCL8,MSX1,TNFAIP3,NPR1,DHRS2,SLC16A2,PTHLH,SULT2B1,FOSL1,OVOL1,LGALS7B,PTGES,NOS3,MSX2
	angiogenesis	GO:0001525	0.000213248	3.67112	515	130	16	21029	ESM1,IL6,TBXA2R,IL1B,CXCL8,TNFAIP3,NPR1,FZD8,ECM1,ID1,SPHK1,TGFA,FOXC2,SH2D2A,RAPGEF3,NOS3
	regulation of gliogenesis	GO:0014013	0.000291268	3.53571	95	90	7	21029	IL6,ID2,ID4,IL1B,ZNF365,HES5,DLX2
	regulation of vasculature development	GO:1901342	0.000338927	3.46989	283	130	12	21029	IL6,TBXA2R,IL1B,CXCL8,TNFAIP3,NPR1,ECM1,ID1,SPHK1,FOXC2,RAPGEF3,NOS3
	regulation of multicellular organismal development	GO:2000026	0.00037889	3.42149	1315	143	27	21029	IL6,TBXA2R,ID2,CSF3,ID4,IL1B,CXCL8,TNFAIP3,NPR1,ZNF365,HES5,ZBED2,FST,DLX2,PTHLH,SULT2B1,SEMA7A,ECM1,ID1,SPHK1,FOXC2,RAPGEF3,NOS3,MSX2,FZD9,MAFF,KLF7
	response to lipid	GO:0033993	0.000451349	3.34549	887	136	21	21029	CXCL1,IL24,IL6,TBXA2R,CMPK2,CSF3,IL1B,CXCL8,CSF2,TNFAIP3,CYP24A1,H3BTX0,CXCL2,GRAMD1B,CXCL3,FOSL1,NOS3,GJB3,MSX2,SLPI,FQSB
	cytokine-mediated signaling pathway	GO:0019221	0.00045535	3.34165	493	109	14	21029	J3QL48,CXCL1,IL6,CSF3,IL1B,CXCL8,TNFAIP3,OAS1,CXCL2,MX1,CXCL3,IRF9,ECM1,SPHK1
	skin development	GO:0043588	0.000487352	3.31216	286	133	12	21029	LCE3D,SPRR2D,IVL,ZBED2,FST,SPRR1B,SNAI1,OVOL1,TGM1,KRT6A,GJB3,MSX2
	response to bacterium	GO:0009617	0.000765511	3.11605	744	66	13	21029	CXCL1,IL24,IL6,TBXA2R,PI3,CMPK2,CSF3,IL1B,CXCL8,CSF2,TNFAIP3,OAS1,CXCL2
	anatomical structure formation involved in morphogenesis	GO:0048646	0.000853511	3.06879	1123	142	24	21029	ESM1,IL6,TBXA2R,IL1B,CXCL8,MSX1,TNFAIP3,NPR1,DUSP2,HES5,DUSP4,FZD8,ECM1,ID1,SNAI1,SPHK1,TGFA,FOXC2,SH2D2A,DUSP5,RAPGEF3,NOS3,MSX2,FOXD1
	regulation of glial cell differentiation	GO:0045685	0.00131242	2.88193	74	90	6	21029	IL6,ID2,ID4,ZNF365,HES5,DLX2
	positive regulation of cell population proliferation	GO:0008284	0.00146493	2.83418	925	140	21	21029	ESM1,IL24,IL6,ID2,CSF3,ID4,IL1B,CSF2,TNFAIP3,HES5,IL11,PTHLH,FOSL1,ECM1,ID1,SPHK1,TGM1,TGFA,KRT6A,FZD9,ODC1
	blood vessel morphogenesis	GO:0048514	0.00194419	2.71126	608	130	16	21029	ESM1,IL6,TBXA2R,IL1B,CXCL8,TNFAIP3,NPR1,FZD8,ECM1,ID1,SPHK1,TGFA,FOXC2,SH2D2A,RAPGEF3,NOS3
	tube morphogenesis	GO:0035239	0.00195864	2.70804	849	142	20	21029	ESM1,IL6,TBXA2R,ID2,IL1B,CXCL8,TNFAIP3,NPR1,HES5,FZD8,ECM1,ID1,SPHK1,TGFA,FOXC2,SH2D2A,RAPGEF3,NOS3,MSX2,FOXD1
	response to cytokine	GO:0034097	0.00202259	2.69409	922	109	18	21029	J3QL48,CXCL1,IL24,IL6,MX2,CSF3,IL1B,CXCL8,CSF2,TNFAIP3,OAS1,CXCL2,MX1,CXCL3,IRF9,FOSL1,ECM1,SPHK1
	regulation of angiogenesis	GO:0045765	0.00228536	2.64105	279	130	11	21029	IL6,TBXA2R,IL1B,CXCL8,TNFAIP3,NPR1,ECM1,SPHK1,FOXC2,RAPGEF3,NOS3
	blood vessel development	GO:0001568	0.00229308	2.63958	693	130	17	21029	ESM1,IL6,TBXA2R,IL1B,CXCL8,TNFAIP3,NPR1,FZD8,FOSL1,ECM1,ID1,SPHK1,TGFA,FOXC2,SH2D2A,RAPGEF3,NOS3
	antimicrobial humoral response	GO:0019730	0.00237893	2.62362	124	135	8	21029	CXCL1,PI3,CXCL8,PRSS3,CXCL2,CXCL3,KRT6A,SLPI
	response to other organism	GO:0051707	0.00247102	2.60712	1488	85	20	21029	J3QL48,CXCL1,IL24,IL6,MX2,TBXA2R,PI3,CMPK2,CSF3,IL1B,CXCL8,CSF2,TNFAIP3,IFI6,OAS1,PRSS3,CXCL2,MX1,NCF2,CXCL3
	response to external biotic stimulus	GO:0043207	0.00254929	2.59358	1491	85	20	21029	J3QL48,CXCL1,IL24,IL6,MX2,TBXA2R,PI3,CMPK2,CSF3,IL1B,CXCL8,CSF2,TNFAIP3,IFI6,OAS1,PRSS3,CXCL2,MX1,NCF2,CXCL3
	connective tissue development	GO:0061448	0.00306454	2.51364	261	143	11	21029	ID4,MSX1,HES5,DLX2,PTHLH,ECM1,SNAI1,FOXC2,MSX2,FOXD1,KLF7
	regulation of astrocyte differentiation	GO:0048710	0.00332883	2.47771	28	68	4	21029	IL6,ID2,ID4,HES5
	response to biotic stimulus	GO:0009607	0.00375748	2.4251	1529	85	20	21029	J3QL48,CXCL1,IL24,IL6,MX2,TBXA2R,PI3,CMPK2,CSF3,IL1B,CXCL8,CSF2,TNFAIP3,IFI6,OAS1,PRSS3,CXCL2,MX1,NCF2,CXCL3
	keratinization	GO:0031424	0.003943	2.40417	67	120	6	21029	LCE3D,SPRR2D,IVL,SPRR1B,TGM1,KRT6A
	vasculature development	GO:0001944	0.00414417	2.38256	724	130	17	21029	ESM1,IL6,TBXA2R,IL1B,CXCL8,TNFAIP3,NPR1,FZD8,FOSL1,ECM1,ID1,SPHK1,TGFA,FOXC2,SH2D2A,RAPGEF3,NOS3
	regulation of epidermal cell differentiation	GO:0045604	0.0041858	2.37822	57	143	6	21029	HES5,ZBED2,SULT2B1,MSX2,MAFF,KLF7
	negative regulation of cell development	GO:0010721	0.00546522	2.26239	175	107	8	21029	IL6,ID4,IL1B,HES5,DLX2,PTHLH,SEMA7A,ID1
	negative regulation of apoptotic process	GO:0043066	0.00608925	2.21544	866	137	19	21029	IL6,SRPINB2,IL1B,MSX1,CSF2,TNFAIP3,HSH2D,SNCB,IFI6,DHRS2,MAPK8IP2,ID1,SNAI1,SPHK1,TGFA,FOXC2,NOS3,MSX2,FZD9
	cellular response to oxygen-containing compound	GO:1901701	0.0064969	2.18729	1164	143	23	21029	CXCL1,IL24,MMP3,IL6,TBXA2R,CMPK2,CSF3,IL1B,CXCL8,CSF2,TNFAIP3,CYP24A1,CXCL2,GRAMD1B,CXCL3,ID1,SPHK1,FOXC2,RAPGEF3,NOS3,GJB3,MSX2,KLF7
	negative regulation of multicellular organismal process	GO:0051241	0.00668845	2.17467	996	143	21	21029	IL6,TBXA2R,ID2,ID4,SRPINB2,IL1B,TNFAIP3,NPR1,OAS1,HES5,DLX2,NAV3,PTHLH,SEMA7A,ECM1,ID1,LGALS7B,FOXC2,NOS3,MSX2,KLF7
	negative regulation of programmed cell death	GO:0043069	0.00805737	2.09381	883	137	19	21029	IL6,SRPINB2,IL1B,MSX1,CSF2,TNFAIP3,HSH2D,SNCB,IFI6,DHRS2,MAPK8IP2,ID1,SNAI1,SPHK1,TGFA,FOXC2,NOS3,MSX2,FZD9
	astrocyte differentiation	GO:0048708	0.00811854	2.09052	76	68	5	21029	IL6,ID2,ID4,IL1B,HES5
	circulatory system development	GO:0072359	0.00822221	2.08501	1089	133	21	21029	ESM1,IL6,TBXA2R,ID2,IL1B,CXCL8,MSX1,TNFAIP3,NPR1,FZD8,FOSL1,ECM1,ID1,SNAI1,SPHK1,TGFA,FOXC2,SH2D2A,RAPGEF3,NOS3,MSX2
	regulation of epidermis development	GO:0045682	0.00831706	2.08003	64	143	6	21029	HES5,ZBED2,SULT2B1,MSX2,MAFF,KLF7
	negative regulation of cell death	GO:0060548	0.00849045	2.07107	971	137	20	21029	IL6,CSF3,SRPINB2,IL1B,MSX1,CSF2,TNFAIP3,HSH2D,SNCB,IFI6,DHRS2,MAPK8IP2,ID1,SNAI1,SPHK1,TGFA,FOXC2,NOS3,MSX2,FZD9
	keratinocyte differentiation	GO:0030216	0.00884626	2.05324	150	133	8	21029	LCE3D,SPRR2D,IVL,ZBED2,SPRR1B,TGM1,KRT6A,MSX2
	regulation of smooth muscle cell proliferation	GO:0048660	0.00889389	2.05091	136	68	6	21029	IL6,ID2,IGFBP3,TNFAIP3,NPR1,HES5
	negative regulation of mitochondrial depolarization	GO:0051902	0.00919519	2.03644	6	137	3	21029	HSH2D,IFI6,FZD9
	cellular response to cytokine stimulus	GO:0071345	0.00967644	2.01428	828	109	16	21029	J3QL48,CXCL1,IL24,IL6,CSF3,IL1B,CXCL8,CSF2,TNFAIP3,OAS1,CXCL2,MX1,CXCL3,IRF9,ECM1,SPHK1
	smooth muscle cell proliferation	GO:0048659	0.010086	1.99628	139	68	6	21029	IL6,ID2,IGFBP3,TNFAIP3,NPR1,HES5
	biological process involved in interspecies interaction between organisms	GO:0044419	0.0102945	1.9874	1634	85	20	21029	J3QL48,CXCL1,IL24,IL6,MX2,TBXA2R,PI3,CMPK2,CSF3,IL1B,CXCL8,CSF2,TNFAIP3,IFI6,OAS1,PRSS3,CXCL2,MX1,NCF2,CXCL3
	regulation of epithelial cell differentiation	GO:0030856	0.0106271	1.97359	143	143	8	21029	IL1B,HES5,ZBED2,SULT2B1,ID1,MSX2,MAFF,KLF7
	positive regulation of vasculature development	GO:1904018	0.0109643	1.96002	158	130	8	21029	TBXA2R,IL1B,CXCL8,ECM1,SPHK1,FOXC2,RAPGEF3,NOS3
	positive regulation of angiogenesis	GO:0045766	0.0109643	1.96002	158	130	8	21029	TBXA2R,IL1B,CXCL8,ECM1,SPHK1,FOXC2,RAPGEF3,NOS3
	negative regulation of neurogenesis	GO:0050768	0.011712	1.93137	138	107	7	21029	IL6,ID4,IL1B,HES5,DLX2,SEMA7A,ID1
	tube development	GO:0035295	0.0128796	1.8901	1047	142	21	21029	ESM1,IL6,TBXA2R,ID2,IL1B,CXCL8,TNFAIP3,NPR1,HES5,FOXF2,FZD8,ECM1,ID1,SPHK1,TGFA,FOXC2,SH2D2A,RAPGEF3,NOS3,MSX2,FOXD1
	negative regulation of nervous system development	GO:0051961	0.0147977	1.82981	143	107	7	21029	IL6,ID4,IL1B,HES5,DLX2,SEMA7A,ID1
	negative regulation of membrane depolarization	GO:1904180	0.0160147	1.79548	7	137	3	21029	HSH2D,IFI6,FZD9
	defense response	GO:0006952	0.0162688	1.78864	1687	121	25	21029	J3QL48,CXCL1,MMP3,IL6,MX2,TBXA2R,PI3,IL1B,CXCL8,TNFAIP3,IFI6,OAS1,CXCL2,IL32,MX1,NCF2,CXCL3,SEMA7A,IRF9,FOSL1,ECM1,MAPK8IP2,SPHK1,KRT6A,PTGES
	regulation of multicellular organismal process	GO:0051239	0.0166827	1.77773	2623	143	37	21029	IL6,TBXA2R,ID2,CSF3,ID4,SRPINB2,IL1B,CXCL8,CSF2,TNFAIP3,NPR1,ZNF365,OAS1,HES5,G0S2,IL32,ZBED2,FST,DLX2,NAV3,PTHLH,SULT2B1,SEMA7A,ECM1,ID1,SNAI1,SPHK1,LGALS7B,FOXC2,PTGES,RAPGEF3,NOS3,MSX2,FZD9,MAFF,FOXD1,KLF7
	negative regulation of developmental process	GO:0051093	0.017823	1.74902	893	143	19	21029	IL6,ID2,ID4,IL1B,MSX1,NPR1,HES5,FST,DLX2,PTHLH,SEMA7A,ECM1,ID1,SNAI1,FOXC2,RAPGEF3,NOS3,MSX2,KLF7
	epithelial cell proliferation	GO:0050673	0.0181535	1.74104	400	113	11	21029	IL6,ID2,IGFBP3,TNFAIP3,HES5,FST,EHF,ECM1,ID1,TGM1,TGFA
	positive regulation of developmental process	GO:0051094	0.0241478	1.61712	1271	142	23	21029	IL6,TBXA2R,ID2,CSF3,IGFBP3,IL1B,CXCL8,CSF2,ZNF365,ZBED2,FST,DLX2,SULT2B1,SEMA7A,ECM1,SNAI1,SPHK1,FOXC2,RAPGEF3,NOS3,MSX2,FZD9,FOXD1
	negative regulation of oligodendrocyte differentiation	GO:0048715	0.0279625	1.55342	12	90	3	21029	ID4,HES5,DLX2
	anatomical structure morphogenesis	GO:0009653	0.0282992	1.54823	2685	143	37	21029	ESM1,J3QL48,IL6,TBXA2R,ID2,ID4,IL1B,CXCL8,MSX1,TNFAIP3,NPR1,ZNF365,DUSP2,HES5,DUSP4,FOXF2,FST,DLX2,SEMA7A,FZD8,ECM1,MAPK8IP2,ID1,SNAI1,SPHK1,TGFA,CARMIL2,FOXC2,KRT6A,SH2D2A,DUSP5,RAPGEF3,NOS3,MSX2,CDC42EP2,FOXD1,KLF7
	cellular response to organic substance	GO:0071310	0.034304	1.46466	2385	143	34	21029	J3QL48,CXCL1,IL24,IL6,TBXA2R,CMPK2,CSF3,IL1B,CXCL8,MSX1,CSF2,TNFAIP3,CYP24A1,H3BTX0,OAS1,CXCL2,HES5,MX1,GRAMD1B,FST,CXCL3,IRF9,ECM1,ID1,SPHK1,FOXC2,RAPGEF3,NOS3,GJB3,MSX2,FQSB,CDC42EP2,FOXD1,KLF7
	positive regulation of organelle organization	GO:0010638	0.0379896	1.42034	488	139	13	21029	CSF3,IL1B,MSX1,CSF2,NAV3,ID1,SPHK1,TGFA,CARMIL2,BIK,RAPGEF3,MSX2,CDC42EP2
	positive regulation of gliogenesis	GO:0014015	0.038666	1.41267	62	56	4	21029	IL6,ID2,IL1B,ZNF365
	mesenchyme morphogenesis	GO:0072132	0.0399012	1.39901	54	133	5	21029	MSX1,SNAI1,FOXC2,NOS3,MSX2
	muscle cell proliferation	GO:0033002	0.0419327	1.37745	190	130	8	21029	IL6,ID2,IGFBP3,TNFAIP3,NPR1,HES5,FOXC2,NOS3
	regulation of developmental process	GO:0050793	0.0468735	1.32907	2421	143	34	21029	J3QL48,IL6,TBXA2R,ID2,CSF3,IGFBP3,ID4,IL1B,CXCL8,MSX1,CSF2,TNFAIP3,NPR1,ZNF365,HES5,ZBED2,FST,DLX2,PTHLH,SULT2B1,SEMA7A,ECM1,ID1,SNAI1,SPHK1,FOXC2,RAPGEF3,NOS3,MSX2,FZD9,MAFF,CDC42EP2,FOXD1,KLF7
	regulation of cell death	GO:0010941	0.0473022	1.32512	1575	137	25	21029	MMP3,IL6,CSF3,IGFBP3,SRPINB2,IL1B,MSX1,CSF2,TNFAIP3,HSH2D,SNCB,IFI6,G0S2,DHRS2,FOSL1,MAPK8IP2,ID1,SNAI1,SPHK1,TGFA,BIK,FOXC2,NOS3,MSX2,FZD9
	regulation of neuroinflammatory response	GO:0150077	0.048439	1.31481	34	109	4	21029	MMP3,IL6,IL1B,SPHK1
	response to external stimulus	GO:0009605	0.0489348	1.31038	2752	143	37	21029	J3QL48,CXCL1,IL24,MMP3,IL6,MX2,TBXA2R,ID2,PI3,CMPK2,CSF3,SRPINB2,IL1B,CXCL8,CSF2,TNFAIP3,CYP24A1,IFI6,OAS1,PRSS3,CXCL2,MX1,NCF2,CXCL3,SEMA7A,IRF9,FOSL1,SPHK1,KRT6A,PTGES,NOS3,SLPI,FQSB,CDC42EP2,ODC1,FOXD1,KLF7
GO:CC	cornified envelope	GO:0001533	0.00103863	2.98354	44	112	5	21672	PI3,SPRR2D,IVL,SPRR1B,TGM1
KEGG	IL-17 signaling pathway	KEGG:04657	1.44281e-07	6.84079	92	104	12	8014	CXCL1,MMP3,IL6,CSF3,IL1B,CXCL8,CSF2,MMP1,TNFAIP3,CXCL2,CXCL3,FOSL1
	Rheumatoid arthritis	KEGG:05323	1.90078e-06	5.72107	88	85	10	8014	CXCL1,MMP3,IL6,IL1B,CXCL8,CSF2,MMP1,CXCL2,IL11,CXCL3
	TNF signaling pathway	KEGG:04668	0.00175192	2.75649	112	85	8	8014	CXCL1,MMP3,IL6,IL1B,CSF2,TNFAIP3,CXCL2,CXCL3
	Legionellosis	KEGG:05134	0.0022051	2.65657	57	85	6	8014	CXCL1,IL6,IL1B,CXCL8,CXCL2,CXCL3
	Amoebiasis	KEGG:05146	0.00270916	2.56717	101	100	8	8014	CXCL1,IL6,IL1B,CXCL8,CSF2,CXCL2,CXCL3,PLCB2
	Coronavirus disease - COVID-19	KEGG:05171	0.00323723	2.48983	231	73	10	8014	MMP3,IL6,MX2,CSF3,IL1B,CXCL8,CSF2,MMP1,OAS1,MX1
	Lipid and atherosclerosis	KEGG:05417	0.00527079	2.27812	214	100	11	8014	CXCL1,MMP3,IL6,IL1B,CXCL8,CALML5,MMP1,CXCL2,NCF2,CXCL3,PLCB2
	NOD-like receptor signaling pathway	KEGG:04621	0.00626206	2.20328	179	101	10	8014	CXCL1,IL6,IL1B,CXCL8,TNFAIP3,OAS1,CXCL2,CXCL3,PLCB2,IRF9
	Transcriptional misregulation in cancer	KEGG:05202	0.00990163	2.00429	191	48	7	8014	H3C4,MMP3,IL6,ID2,IGFBP3,CXCL8,CSF2
	Malaria	KEGG:05144	0.0109992	1.95864	49	44	4	8014	IL6,CSF3,IL1B,CXCL8
	Cytokine-cytokine receptor interaction	KEGG:04060	0.0194492	1.7111	293	85	11	8014	CXCL1,IL24,IL6,CSF3,IL1B,CXCL8,CSF2,CXCL2,IL32,IL11,CXCL3
	Viral protein interaction with cytokine and cytokine receptor	KEGG:04061	0.0452496	1.34439	98	85	6	8014	CXCL1,IL24,IL6,CXCL8,CXCL2,CXCL3
REAC	Interleukin-10 signaling	REAC:R-HSA-6783783	3.53218e-06	5.45196	45	66	7	10760	CXCL1,IL6,CSF3,IL1B,CXCL8,CSF2,CXCL2
	Formation of the cornified envelope	REAC:R-HSA-6809371	6.72964e-05	4.17201	128	120	11	10760	LCE3D,KRT75,PI3,KRT81,SPRR2D,KRT6B,IVL,KRT6C,SPRR1B,TGM1,KRT6A
	Cytokine Signaling in Immune system	REAC:R-HSA-1280215	0.000541214	3.26663	705	76	18	10760	H3C4,CXCL1,IL24,MMP3,IL6,MX2,CSF3,SRPINB2,IL1B,CXCL8,CSF2,MMP1,IFI6,OAS1,CXCL2,IL32,MX1,DUSP4
	Signaling by Interleukins	REAC:R-HSA-449147	0.000900336	3.0456	460	84	15	10760	H3C4,CXCL1,IL24,MMP3,IL6,CSF3,SRPINB2,IL1B,CXCL8,CSF2,MMP1,CXCL2,IL32,DUSP4,IL11
	Keratinization	REAC:R-HSA-6805567	0.0107395	1.96901	215	120	11	10760	LCE3D,KRT75,PI3,KRT81,SPRR2D,KRT6B,IVL,KRT6C,SPRR1B,TGM1,KRT6A
	Nuclear Events (kinase and transcription factor activation)	REAC:R-HSA-198725	0.0454667	1.34231	61	136	6	10760	ID2,ID4,DUSP4,FOSL1,ID1,FQSB
	RAF-independent MAPK1/3 activation	REAC:R-HSA-112409	0.045568	1.34134	22	127	4	10760	IL6,DUSP2,DUSP4,DUSP5
	NGF-stimulated transcription	REAC:R-HSA-9031628	0.048472	1.31451	39	136	5	10760	ID2,ID4,FOSL1,ID1,FQSB
WP	Cytokines and inflammatory response	WP:WP530	1.01264e-06	5.99455	26	84	7	7806	CXCL1,IL6,CSF3,IL1B,CSF2,CXCL2,IL11
	Overview of proinflammatory and profibrotic mediators	WP:WP5095	1.37249e-06	5.86249	127	85	12	7806	CXCL1,IL24,MMP3,IL6,CSF3,IL1B,CXCL8,CSF2,MMP1,CXCL2,IL11,CXCL3
	Photodynamic therapy-induced NF-kB survival signaling	WP:WP3617	1.74266e-06	5.75879	35	66	7	7806	MMP3,IL6,IL1B,CXCL8,CSF2,MMP1,CXCL2
	COVID-19 adverse outcome pathway	WP:WP4891	0.000160465	3.79462	15	44	4	7806	IL6,CSF3,IL1B,CXCL8
	Antiviral and anti-inflammatory effects of Nrf2 on SARS-CoV-2 pathway	WP:WP5113	0.000217523	3.6625	32	50	5	7806	MMP3,IL6,IL1B,CXCL8,MMP1
	Senescence and autophagy in cancer	WP:WP615	0.000281057	3.55121	108	44	7	7806	CXCL1,IL24,IL6,IGFBP3,SRPINB2,IL1B,CXCL8
	Burn wound healing	WP:WP5055	0.000886154	3.05249	110	51	7	7806	CXCL1,MMP3,IL6,IL1B,CXCL8,MMP1,TNFAIP3
	SARS-CoV-2 innate immunity evasion and cell-specific immune response	WP:WP5039	0.00112242	2.94985	68	85	7	7806	CXCL1,IL6,CXCL8,CSF2,CXCL2,MX1,CXCL3
	Lung fibrosis	WP:WP3624	0.0018915	2.72319	63	66	6	7806	IL6,CSF3,IL1B,CXCL8,CSF2,CXCL2
	Orexin receptor pathway	WP:WP5094	0.0021257	2.6725	153	138	12	7806	MMP3,IL6,ALPP,ID4,IL1B,CXCL8,CXCL2,DUSP4,ID1,NOS3,FQSB,MAFF
	Prostaglandin signaling	WP:WP5088	0.00446783	2.3499	33	44	4	7806	CXCL1,IL6,IL1B,CXCL8
	LTF danger signal response pathway	WP:WP4478	0.0249542	1.60286	20	44	3	7806	IL6,IL1B,CXCL8
