# Supplementary material for: Endo180 and basement membrane stiffness induce OXPHOS and neoplasia in aging prostate epithelia
Source: Research Square preprint supplement (doi:10.21203/rs.3.rs-4837876/v1), 2024-09-19
Supplement: Supplementary file 9 [file bab242578c452f2079e839ea.xlsx]

## Sheet: UP (stiff vs native)
Supplementary data 8. GO terms in Endo180-KO-acini (stiff-BM versus native-BM)
Source	Term name	Term ID	Adjusted p value	Negative log10 adjusted p value	Term size	Query size	Intersection size	Effective domain size	Intersections
GO:MF	DNA-binding transcription factor activity	GO:0003700	6.03627e-07	6.21923	1415	504	74	20195	ZNF429,SPDEF,ZNF320,MAF,ZNF117,TP73,SOX6,ZNF680,ZNF540,ZNF658,TFCP2L1,CSRNP3,ZNF273,ZNF546,ZNF439,RORA,ZFP14,ZBTB41,ZNF763,ZNF25,DMRTA1,ZNF214,ZNF709,ZNF107,ZNF92,ZNF138,ZBTB16,ZNF713,HOXD9,ZFP37,PLAG1,ZNF148,ZBTB10,ZNF20,ZNF260,PBX1,ZNF10,ZNF484,ZNF704,FOXN1,MAFB,NR1D2,ZNF136,ZNF678,CARF,ZNF606,ZNF644,ZNF440,ETV1,GTF2IRD2,KLF9,ZNF181,ZNF654,ZNF184,ZNF280D,ZNF43,ZNF519,ZNF354C,NHLH2,ZNF112,ZSCAN3…
	DNA-binding transcription factor activity, RNA polymerase II-specific	GO:0000981	7.05938e-07	6.15123	1364	504	72	20195	ZNF429,SPDEF,ZNF320,MAF,ZNF117,TP73,SOX6,ZNF680,ZNF540,ZNF658,TFCP2L1,CSRNP3,ZNF273,ZNF546,ZNF439,RORA,ZFP14,ZBTB41,ZNF25,DMRTA1,ZNF214,ZNF709,ZNF107,ZNF92,ZNF138,ZBTB16,ZNF713,HOXD9,ZFP37,PLAG1,ZNF148,ZBTB10,ZNF20,ZNF260,PBX1,ZNF10,ZNF484,FOXN1,MAFB,NR1D2,ZNF136,ZNF678,CARF,ZNF606,ZNF644,ZNF440,ETV1,GTF2IRD2,KLF9,ZNF181,ZNF654,ZNF184,ZNF280D,ZNF43,ZNF519,ZNF354C,NHLH2,ZNF112,ZSCAN31,MEF2A,ZNF180…
	RNA polymerase II transcription regulatory region sequence-specific DNA binding	GO:0000977	7.60879e-05	4.11868	1411	504	68	20195	ZNF429,ZNF320,MAF,ZNF117,TP73,SOX6,ZNF680,ZNF540,ZNF658,TFCP2L1,ZNF273,ZNF546,ZNF439,RORA,ZFP14,ZBTB41,ZNF763,ZNF25,DMRTA1,ZNF214,ZNF709,ZNF107,ZNF92,ZNF138,ZBTB16,ZNF713,HOXD9,ZFP37,PLAG1,ZNF148,ZBTB10,ZNF20,ZNF260,PBX1,ZNF10,ZNF484,ZNF704,MAFB,NR1D2,ZNF136,ZNF678,CARF,ZNF606,ZNF644,ZNF440,ETV1,KLF9,ZNF181,ZNF184,ZNF280D,ZNF43,ZNF519,ZNF354C,NHLH2,ZNF112,ZSCAN31,MEF2A,ZNF180,HOXA13,ZSCAN23,ZNF25…
	sequence-specific double-stranded DNA binding	GO:1990837	0.000191346	3.71818	1566	504	72	20195	ZNF429,SPDEF,ZNF320,MAF,ZNF117,TP73,SOX6,ZNF680,ZNF540,ZNF658,TFCP2L1,ZNF273,ZNF546,ZNF439,RORA,ZFP14,ZBTB41,ZNF763,ZNF25,DMRTA1,ZNF214,ZNF709,ZNF107,ZNF92,ZNF138,ZBTB16,ZNF713,HOXD9,ZFP37,PLAG1,ZNF148,ZBTB10,ZNF20,ZNF260,PBX1,ZNF10,ZNF484,ZNF704,FOXN1,MAFB,NR1D2,ZNF136,ZNF678,CARF,ZNF606,ZNF644,ZNF440,ETV1,KLF9,MBNL2,ZNF181,ZNF184,ZNF280D,ZNF43,ZNF519,ZNF354C,NHLH2,ZNF112,ZSCAN31,MEF2A,ZNF180,HO…
	transcription cis-regulatory region binding	GO:0000976	0.000200549	3.69778	1508	504	70	20195	ZNF429,ZNF320,MAF,ZNF117,TP73,SOX6,ZNF680,ZNF540,ZNF658,TFCP2L1,ZNF273,ZNF546,ZNF439,RORA,ZFP14,ZBTB41,ZNF763,ZNF25,DMRTA1,ZNF214,ZNF709,ZNF107,ZNF92,ZNF138,ZBTB16,ZNF713,HOXD9,ZFP37,PLAG1,ZNF148,ZBTB10,ZNF20,ZNF260,PBX1,ZNF10,ZNF484,ZNF704,FOXN1,MAFB,NR1D2,ZNF136,ZNF678,CARF,ZNF606,ZNF644,ZNF440,ETV1,KLF9,ZNF181,ZNF184,ZNF280D,ZNF43,ZNF519,ZNF354C,NHLH2,ZNF112,ZSCAN31,MEF2A,ZNF180,HOXA13,ZSCAN23…
	transcription regulator activity	GO:0140110	0.000203408	3.69163	1936	504	84	20195	ZNF429,SPDEF,ZNF320,MAF,ZNF117,TP73,SOX6,ZNF680,ZNF540,ZNF658,TFCP2L1,CSRNP3,ZNF273,ZNF546,WNT4,ZNF439,RORA,ZFP14,ZBTB41,ZNF763,ZNF25,DMRTA1,ZNF214,ZNF709,ZNF107,WNT3A,ZNF92,ZNF138,ZBTB16,ZNF713,HOXD9,MAML2,ZFP37,PLAG1,ZNF148,ZBTB10,EAF2,ZNF20,ZNF260,PBX1,ZNF10,ZNF484,ZNF704,FOXN1,MAFB,NR1D2,ZNF136,ZNF678,CARF,ZNF606,ZNF644,ZNF440,ETV1,GTF2IRD2,KLF9,ZNF181,MIER3,ZNF654,AEBP2,ZNF184,ZNF280D,ZNF43,…
	transcription regulatory region nucleic acid binding	GO:0001067	0.000210682	3.67637	1510	504	70	20195	ZNF429,ZNF320,MAF,ZNF117,TP73,SOX6,ZNF680,ZNF540,ZNF658,TFCP2L1,ZNF273,ZNF546,ZNF439,RORA,ZFP14,ZBTB41,ZNF763,ZNF25,DMRTA1,ZNF214,ZNF709,ZNF107,ZNF92,ZNF138,ZBTB16,ZNF713,HOXD9,ZFP37,PLAG1,ZNF148,ZBTB10,ZNF20,ZNF260,PBX1,ZNF10,ZNF484,ZNF704,FOXN1,MAFB,NR1D2,ZNF136,ZNF678,CARF,ZNF606,ZNF644,ZNF440,ETV1,KLF9,ZNF181,ZNF184,ZNF280D,ZNF43,ZNF519,ZNF354C,NHLH2,ZNF112,ZSCAN31,MEF2A,ZNF180,HOXA13,ZSCAN23…
	DNA binding	GO:0003677	0.000272008	3.56542	2524	504	102	20195	ZNF429,SERPINA3,SPDEF,ZNF320,MAF,ZNF117,TP73,SOX6,ZNF680,ZNF540,ZNF658,TFCP2L1,CSRNP3,ZNF273,ZNF546,CXXC5,ZNF439,RORA,ZFP14,ZBTB41,ZNF763,ZNF25,DMRTA1,ZNF214,ZNF709,ZNF107,ZNF92,POLI,ZNF138,TREX2,ZBTB16,ZNF713,HOXD9,ZFP37,PLAG1,ZNF148,MLLT3,LCORL,ZBTB10,ZNF20,ZNF260,PBX1,ZNF10,ZNF484,ZNF704,FOXN1,MAFB,NR1D2,ZNF136,ZNF678,CARF,ATRX,ZNF606,ZNF644,ZNF440,ETV1,CERS6,AKAP9,GTF2IRD2,KLF9,MBNL2,CHD9,XRC…
	sequence-specific DNA binding	GO:0043565	0.00054973	3.25985	1672	504	74	20195	ZNF429,SPDEF,ZNF320,MAF,ZNF117,TP73,SOX6,ZNF680,ZNF540,ZNF658,TFCP2L1,CSRNP3,ZNF273,ZNF546,CXXC5,ZNF439,RORA,ZFP14,ZBTB41,ZNF763,ZNF25,DMRTA1,ZNF214,ZNF709,ZNF107,ZNF92,ZNF138,ZBTB16,ZNF713,HOXD9,ZFP37,PLAG1,ZNF148,ZBTB10,ZNF20,ZNF260,PBX1,ZNF10,ZNF484,ZNF704,FOXN1,MAFB,NR1D2,ZNF136,ZNF678,CARF,ZNF606,ZNF644,ZNF440,ETV1,KLF9,MBNL2,ZNF181,ZNF184,ZNF280D,ZNF43,ZNF519,ZNF354C,NHLH2,ZNF112,ZSCAN31,ME…
	double-stranded DNA binding	GO:0003690	0.000972943	3.01191	1667	504	73	20195	ZNF429,SPDEF,ZNF320,MAF,ZNF117,TP73,SOX6,ZNF680,ZNF540,ZNF658,TFCP2L1,ZNF273,ZNF546,ZNF439,RORA,ZFP14,ZBTB41,ZNF763,ZNF25,DMRTA1,ZNF214,ZNF709,ZNF107,ZNF92,ZNF138,ZBTB16,ZNF713,HOXD9,ZFP37,PLAG1,ZNF148,ZBTB10,ZNF20,ZNF260,PBX1,ZNF10,ZNF484,ZNF704,FOXN1,MAFB,NR1D2,ZNF136,ZNF678,CARF,ZNF606,ZNF644,ZNF440,ETV1,KLF9,MBNL2,ZNF181,ZNF184,ZNF280D,ZNF43,ZNF519,DDX60,ZNF354C,NHLH2,ZNF112,ZSCAN31,MEF2A,ZNF…
	RNA polymerase II cis-regulatory region sequence-specific DNA binding	GO:0000978	0.00124898	2.90344	1196	504	57	20195	ZNF429,ZNF320,MAF,ZNF117,TP73,SOX6,ZNF680,ZNF540,ZNF658,TFCP2L1,ZNF273,ZNF546,RORA,ZFP14,ZBTB41,ZNF763,DMRTA1,ZNF214,ZNF107,ZNF92,ZNF138,ZBTB16,ZNF713,HOXD9,PLAG1,ZNF148,ZNF260,PBX1,ZNF484,ZNF704,MAFB,NR1D2,ZNF136,ZNF678,CARF,ZNF606,ZNF644,ETV1,KLF9,ZNF181,ZNF184,ZNF280D,ZNF43,ZNF519,ZNF354C,NHLH2,ZNF112,ZSCAN31,MEF2A,HOXA13,ZSCAN23,ZNF254,REL,ZNF483,ZNF253,ZNF780A,ZNF100
	cis-regulatory region sequence-specific DNA binding	GO:0000987	0.00207459	2.68307	1216	504	57	20195	ZNF429,ZNF320,MAF,ZNF117,TP73,SOX6,ZNF680,ZNF540,ZNF658,TFCP2L1,ZNF273,ZNF546,RORA,ZFP14,ZBTB41,ZNF763,DMRTA1,ZNF214,ZNF107,ZNF92,ZNF138,ZBTB16,ZNF713,HOXD9,PLAG1,ZNF148,ZNF260,PBX1,ZNF484,ZNF704,MAFB,NR1D2,ZNF136,ZNF678,CARF,ZNF606,ZNF644,ETV1,KLF9,ZNF181,ZNF184,ZNF280D,ZNF43,ZNF519,ZNF354C,NHLH2,ZNF112,ZSCAN31,MEF2A,HOXA13,ZSCAN23,ZNF254,REL,ZNF483,ZNF253,ZNF780A,ZNF100
GO:BP	regulation of transcription by RNA polymerase II	GO:0006357	7.06621e-07	6.15081	2564	494	109	21110	FGF1,ZNF429,SPDEF,ZNF320,MAF,ZNF117,TP73,SOX6,TRPV4,BMP7,ZNF680,ZNF540,ZNF658,TFCP2L1,CSRNP3,FRK,ZNF273,ZNF546,USP2,ZNF608,CXXC5,ZNF439,RORA,ZFP14,TLR3,ZBTB41,ZNF763,ZNF25,DMRTA1,ZNF214,IFT74,ZNF709,ZNF107,WNT3A,ZNF92,ZNF138,PIK3R1,TSC22D3,ZBTB16,ZNF713,HOXD9,MAML2,ZFP37,PLAG1,ZNF148,EFCAB7,MLLT3,LCORL,ZBTB10,EAF2,ZNF20,BRMS1L,ZNF260,PBX1,ZNF10,ZNF484,ZNF704,FOXN1,MAFB,CCPG1,NR1D2,ZNF136,ZNF678,C…
	transcription by RNA polymerase II	GO:0006366	4.11066e-06	5.38609	2677	494	110	21110	FGF1,ZNF429,SPDEF,ZNF320,MAF,ZNF117,TP73,C5AR1,SOX6,TRPV4,BMP7,ZNF680,ZNF540,ZNF658,TFCP2L1,CSRNP3,FRK,ZNF273,ZNF546,USP2,ZNF608,CXXC5,ZNF439,RORA,ZFP14,TLR3,ZBTB41,ZNF763,ZNF25,DMRTA1,ZNF214,IFT74,ZNF709,ZNF107,WNT3A,ZNF92,ZNF138,PIK3R1,TSC22D3,ZBTB16,ZNF713,HOXD9,MAML2,ZFP37,PLAG1,ZNF148,EFCAB7,MLLT3,LCORL,ZBTB10,EAF2,ZNF20,BRMS1L,ZNF260,PBX1,ZNF10,ZNF484,ZNF704,FOXN1,MAFB,CCPG1,NR1D2,ZNF136,ZN…
	tissue development	GO:0009888	0.00012499	3.90313	2008	494	85	21110	FGF1,KRT15,AGR2,SARBS2,SPDEF,MAF,WNT6,TP73,SOX6,CST6,CYP1B1,GHR,TRPV4,EPHA7,WDR72,TGFB2,WNT5B,TPPP3,P2RX7,BMP7,TFCP2L1,WNT4,KRT19,NEBL,CXADR,PSAPL1,PRKACB,LOX,BGN,IFT74,CD109,WNT3A,FAT4,PLCB1,PDE4D,DAAM1,PRKG2,IFT80,IL6ST,ZBTB16,HOXD9,MLLT3,ADAMTS7,ARRDC3,PTEN,PBX1,HS2ST1,SEMA3C,CACNB4,LFNG,ITGB8,SULF1,FOXN1,MAFB,ATP7A,COL5A2,NR1D2,SEMA6D,MEGF9,ATRX,CDK1,BLTP1,CENPF,ITGAV,EFEMP1,SLITRK6,KIF20B,TE…
	reproductive structure development	GO:0048608	0.000718868	3.14335	307	494	24	21110	KIT,CYP1B1,TNFSF10,TGFB2,BMP7,WNT4,PSAPL1,TLR3,SERPINF1,DMRTA1,PLAG1,EAF2,LFNG,SULF1,ATRX,KIF18A,NHLH2,PLEKHA1,ASPM,HOXA13,WNT5A,BRCA2,ATM,SYCP2
	reproductive system development	GO:0061458	0.000910537	3.0407	311	494	24	21110	KIT,CYP1B1,TNFSF10,TGFB2,BMP7,WNT4,PSAPL1,TLR3,SERPINF1,DMRTA1,PLAG1,EAF2,LFNG,SULF1,ATRX,KIF18A,NHLH2,PLEKHA1,ASPM,HOXA13,WNT5A,BRCA2,ATM,SYCP2
	gland development	GO:0048732	0.00215789	2.66597	447	494	29	21110	FGF1,CYP1B1,UGT1A7,TGFB2,UGT1A1,BMP7,TFCP2L1,UGT1A6,WNT4,PSAPL1,SERPINF1,TG,WNT3A,CADM1,HOXD9,PLAG1,ARHGAP5,EAF2,PBX1,SEMA3C,CACNB4,SULF1,FOXN1,MAFB,ATP7A,HOXA13,WNT5A,BRCA2,ATM
	developmental growth	GO:0048589	0.013954	1.8553	655	494	35	21110	FGF1,AGR2,SARBS2,TP73,MAP2,GHR,EPHA7,TGFB2,CXADR,PSAPL1,LEPR,GAS1,WNT3A,PLCB1,IFT80,LGR6,PLAG1,PTEN,SEMA3C,SEMA6D,NINJ1,ATRX,CDK1,SLITRK6,ALCAM,PLEKHA1,ASPM,TBL1XR1,WNT5A,BRCA2,SOS1,COPS2,PPP2R3A,ATM,AKAP6
	cell development	GO:0048468	0.0201999	1.69465	2763	494	99	21110	KIT,SARBS2,SPDEF,CEP290,MAF,MNS1,TP73,C5AR1,CAMK2B,MAP2,TRPV4,EPHA7,TGFB2,WNT5B,BMP7,C21orf91,TFCP2L1,WNT4,KRT19,NEBL,CXADR,ADAM22,RIMBP3,ANOS1,RORA,TMEM106B,TLR3,LEPR,LOX,SERPINF1,DMRTA1,IFT74,CD109,WNT3A,FAT4,FAXDC2,PIK3R3,RBP1,SPOCK1,PLCB1,PDE4D,PIK3R1,IL6ST,ZBTB16,LGR6,MEIOC,HOXD9,PDE5A,PLAG1,MLLT3,PTEN,PBX1,SEMA3C,CACNB4,ANK3,LFNG,UFL1,ITGB8,SULF1,FOXN1,MAFB,ATP7A,DOCK11,SEMA6D,ATRX,CDK1,ETV…
	regulation of developmental process	GO:0050793	0.0208512	1.68087	2482	494	91	21110	FGF1,SULT1E1,KIT,DISP3,DNAI3,AGR2,SPDEF,MAF,WNT6,TENT5C,TP73,C5AR1,CAMK2B,SOX6,TP53INP1,CYP1B1,MAP2,GHR,TRPV4,EPHA7,TGFB2,WNT5B,P2RX7,BMP7,C21orf91,WNT4,CXADR,RORA,TMEM106B,TLR3,LOX,SERPINF1,TG,CD109,WNT3A,FAT4,FAXDC2,RBP1,AMOT,PLCB1,DAAM1,PIK3R1,PRKG2,IL6ST,ZBTB16,C5,PDE5A,PLAG1,MLLT3,EAF2,ADAMTS7,SUCO,BRMS1L,PTEN,PBX1,SEMA3C,MBNL3,LFNG,UFL1,ITGB8,SULF1,FOXN1,MAFB,TRIM6,COL5A2,NR1D2,SEMA6D,NINJ1…
	circulatory system development	GO:0072359	0.0254824	1.59376	1123	494	50	21110	FGF1,KIT,SARBS2,VAV3,TP73,C5AR1,SOX6,CYP1B1,HPGD,TGFB2,SLCA12,BMP7,WNT4,NEBL,CXADR,RORA,TLR3,LEPR,LOX,SERPINF1,SLCA10,IFT74,WNT3A,FAT4,PIK3R3,AMOT,C5,PTEN,SEMA3C,ITGB8,SULF1,FOXN1,ATP7A,NINJ1,CDK1,TMEM65,ITGAV,COL8A1,MEF2A,HOXA13,WNT5A,DNAH5,SOS1,MIB1,GAB1,IL6R,PLCE1,SLC1A1,ATM,AKAP6
	connective tissue development	GO:0061448	0.0286299	1.54318	281	494	20	21110	MAF,SOX6,GHR,TRPV4,WNT5B,BMP7,LOX,BGN,PRKG2,IFT80,ZBTB16,ADAMTS7,ARRDC3,ITGB8,SULF1,ATP7A,EFEMP1,TBL1XR1,WNT5A,IL6R
	microtubule-based process	GO:0007017	0.0287072	1.54201	943	494	44	21110	DNAH6,DNAI3,MNS1,MAP2,TRPV4,TPPP3,PIERCE2,CCDC102B,LCA5,LCA5L,IFT74,WNT3A,IFT80,CEP70,CEP44,CEP126,KIF27,CCP110,CETN3,ATRX,CDK1,AKAP9,TPPP,HOOK1,KTN1,VPS13A,CILK1,KIF20B,KIF18A,STAG2,PRKAA2,ASPM,CEP350,ABRAXAS1,DNAH5,SASS6,BRCA2,CKAP2,TMEM67,SPAST,ATXN3,CNTLN,SSX2IP,TTK
	microtubule cytoskeleton organization	GO:0000226	0.0327344	1.485	653	494	34	21110	DNAI3,MNS1,MAP2,TRPV4,TPPP3,PIERCE2,CCDC102B,WNT3A,CEP70,CEP44,CEP126,CCP110,CETN3,ATRX,CDK1,AKAP9,TPPP,HOOK1,KIF18A,STAG2,PRKAA2,ASPM,CEP350,ABRAXAS1,DNAH5,SASS6,BRCA2,CKAP2,TMEM67,SPAST,ATXN3,CNTLN,SSX2IP,TTK
	reproduction	GO:0000003	0.0404985	1.39256	1530	494	62	21110	KIT,MAP2K6,MNS1,CYP1B1,HPGD,TNFSF10,CLGN,TGFB2,TPPP3,BMP7,WNT4,KRT19,CXADR,RIMBP3,PSAPL1,TLR3,LEPR,SERPINF1,DMRTA1,CDKL2,PLCB1,CADM1,ZBTB16,MEIOC,HOXD9,PDE5A,PLAG1,ZNF148,EAF2,PBX1,PDIK1L,LFNG,SULF1,ATP7A,TSGA10,SGO2,ATRX,CDK1,SYNE1,ADAM32,HOOK1,TUT4,SMC2,TEX15,VPS13A,KIF18A,NHLH2,STAG2,TOP2A,PLEKHA1,GMCL1,ASPM,HOXA13,SPATA6,WNT5A,DNAH5,BRCA2,SOS1,ATM,SYCP2,LIN9,TTK
	sex differentiation	GO:0007548	0.0409844	1.38738	288	494	20	21110	KIT,CYP1B1,TNFSF10,TGFB2,WNT4,TLR3,DMRTA1,CDKL2,PBX1,LFNG,ATRX,KIF18A,NHLH2,PLEKHA1,ASPM,HOXA13,WNT5A,BRCA2,ATM,SYCP2
	prostate gland development	GO:0030850	0.0412336	1.38475	49	494	8	21110	BMP7,PSAPL1,SERPINF1,PLAG1,EAF2,SULF1,HOXA13,WNT5A
	embryo development	GO:0009790	0.0417124	1.37973	1144	494	50	21110	KIT,WNT6,TENT5C,TGFB2,WNT5B,ST8SIA6,BMP7,WNT4,KRT19,ZFP14,PRKACB,LPAR6,SLCA10,WNT3A,AMOT,PLCB1,PGAP1,ZBTB16,HOXD9,C5,SMIM14,PBX1,HS2ST1,SEMA3C,LFNG,SULF1,MAFB,ATP7A,COL5A2,CDK1,ZDBF2,ITGAV,EFEMP1,DISP1,SLITRK6,KIF20B,COL8A1,TOP2A,HOXA13,TBL1XR1,WNT5A,BRCA2,FZD6,SOS1,COPS2,MIB1,PPP2R3A,ATM,UBR3,CEP290
	tube development	GO:0035295	0.0424751	1.37187	1082	494	48	21110	FGF1,KIT,AGR2,VAV3,SPDEF,WNT6,TP73,C5AR1,CYP1B1,HPGD,EPHA7,TGFB2,BMP7,WNT4,RORA,TLR3,PRKACB,LEPR,LOX,SERPINF1,WNT3A,FAT4,PIK3R3,AMOT,IL6ST,C5,PBX1,HS2ST1,SEMA3C,ITGB8,SULF1,FOXN1,ATP7A,NINJ1,ATRX,ITGAV,KIF20B,KIF18A,COL8A1,HOXA13,WNT5A,FZD6,SOS1,MIB1,GAB1,ITGB6,SLC1A1,CEP290
	vascular endothelial growth factor production	GO:0010573	0.0426799	1.36978	36	494	7	21110	C5AR1,CYP1B1,RORA,IL6ST,C5,SULF1,IL6R
	skeletal system development	GO:0001501	0.044501	1.35163	550	494	30	21110	KIT,MAP2K6,MAF,SOX6,GHR,TRPV4,TGFB2,WNT5B,P2RX7,BMP7,LEPR,LOX,BGN,SLCA10,FAT4,PRKG2,IFT80,ZBTB16,HOXD9,ADAMTS7,PBX1,ITGB8,SULF1,ATP7A,COL5A2,EFEMP1,PLEKHA1,HOXA13,WNT5A,ITGB6
GO:CC	microtubule organizing center	GO:0005815	2.75562e-06	5.55978	852	518	49	22122	TENT5C,CAMK2B,KLHL4,CEP112,USP2,CCDC102B,LCA5,PRKACB,CDKL2,IFT74,PDE4D,DAAM1,FAM161A,IFT80,PLAG1,CEP70,CEP44,CEP126,SLF1,CCP110,HMMR,CETN3,TSGA10,CDK1,SYNE1,AKAP9,CENPF,HOOK1,CILK1,MTUS1,KIF20B,CEP162,KIF18A,PCGF5,TOP2A,ASPM,CCDC14,CEP350,SASS6,BRCA2,CKAP2,TMEM67,MIB1,SPAST,ITGB6,CNTLN,ATM,SSX2IP,CEP290
	microtubule cytoskeleton	GO:0015630	1.35878e-05	4.86685	1392	518	66	22122	DNAH6,DNAI3,MNS1,TENT5C,CAMK2B,KLHL4,MAP2,TRPV4,TPPP3,PIERCE2,CEP112,USP2,RIMBP3,CCDC102B,LCA5,PRKACB,CDKL2,IFT74,PDE4D,DAAM1,FAM161A,IFT80,PLAG1,CEP70,CEP44,CEP126,SLF1,KIF27,CCP110,HMMR,CETN3,TSGA10,CDK1,SYNE1,AKAP9,TPPP,SNX4,CENPF,HOOK1,LYST,CILK1,MTUS1,KIF20B,CEP162,KIF18A,STAG2,PCGF5,TOP2A,ARL6,ASPM,CCDC14,CEP350,TBL1XR1,DNAH5,SASS6,BRCA2,CKAP2,TMEM67,MIB1,SPAST,ITGB6,CNTLN,ATM,SSX2IP,TTK,CE…
	centrosome	GO:0005813	2.76691e-05	4.55801	645	518	39	22122	TENT5C,KLHL4,CEP112,USP2,PRKACB,CDKL2,IFT74,FAM161A,IFT80,PLAG1,CEP70,CEP44,CEP126,SLF1,CCP110,HMMR,CETN3,CDK1,SYNE1,AKAP9,CENPF,HOOK1,KIF20B,CEP162,PCGF5,ASPM,CCDC14,CEP350,SASS6,BRCA2,CKAP2,TMEM67,MIB1,SPAST,ITGB6,CNTLN,ATM,SSX2IP,CEP290
	endoplasmic reticulum	GO:0005783	0.0016262	2.78883	2059	518	80	22122	DISP3,FIBIN,KCNJ2,TMT1A,AGR2,WNT6,RETREG1,CAMK2B,CYP1B1,TFPI,TRPV4,UGT1A7,CLGN,WNT5B,ALDH3A1,UGT1A1,CYP39A1,ATP8A1,RNF128,UGT1A6,WNT4,TLCD4,PROS1,TLR3,DNAJB14,TMTC3,WNT3A,FAXDC2,SLC27A2,PGAP1,IFIT2,TRIQK,PIK3R1,PPM1L,ARHGAP5,SMIM14,ADAMTS7,MOXD1,SUCO,GRAMD1C,ANK3,UFL1,SULF1,ATP7A,PLOD2,COL5A2,TMCC2,VPS13C,CLEC2D,FKBP7,ZDHHC20,CYP4X1,CDK1,CERS6,BLTP1,HSPA13,AGL,LMAN1,PLEKHF2,SLC2A4,KTN1,PIGK,VPS13…
	cytoskeleton	GO:0005856	0.0175182	1.75651	2412	518	86	22122	DNAH6,DNAI3,KRT15,MAP2K6,SARBS2,MNS1,TENT5C,CAMK2B,KLHL4,MAP2,TRPV4,TPPP3,RNF128,PIERCE2,CEP112,USP2,KRT19,NEBL,RIMBP3,CCDC102B,LCA5,BMF,PRKACB,CYS1,LCA5L,CDKL2,IFT74,AMOT,PDE4D,DAAM1,FAM161A,IFT80,PLAG1,CEP70,CEP44,CEP126,SLF1,KIF27,ANK3,CCP110,HMMR,CETN3,NEURL1B,TSGA10,UTRN,CDK1,SYNE1,AKAP9,TPPP,SNX4,CENPF,HOOK1,LYST,CILK1,MTUS1,DDX60,KIF20B,CEP162,KIF18A,STAG2,PCGF5,ADD3,TOP2A,ARL6,CENPQ,ASPM,…
	plasma membrane region	GO:0098590	0.0379774	1.42047	1292	518	52	22122	KCNJ2,SARBS2,CNTNAP2,SLC38A4,SLC15A2,C5AR1,STON1,HPGD,TFPI,TRPV4,EPHA7,SLC2A5,C1QTNF5,KCTD16,SLCO2A1,KRT19,CXADR,ADAM22,LEPR,CYS1,SLC2A13,PDE4D,SCNN1G,PRKG2,CADM1,EFCAB7,PTEN,ANK3,ATP7A,SLC26A2,NINJ1,UTRN,SYNE1,AKAP9,ITGAV,SLC2A4,DISP1,KIF18A,ARL6,PLEKHA1,P2RX6,ASPM,ANK1,EPS8,STXBP3,FZD6,TMEM67,IL6R,TMEM30A,SLC1A1,AKAP6,CAVIN2
KEGG	Herpes simplex virus 1 infection	KEGG:05168	5.24234e-08	7.28047	505	212	39	8161	ZNF429,ZNF320,ZNF680,ZNF540,ZNF658,ZNF273,ZNF546,ZNF439,ZFP14,TLR3,ZNF763,ZNF25,ZNF214,ZNF709,ZNF107,PIK3R3,ZNF92,PIK3R1,ZNF713,C5,ZFP37,ZNF20,ZNF10,ZNF484,ZNF714,ZNF136,ZNF606,ZNF440,ZNF181,ZNF184,ZNF43,ZNF519,ZNF354C,ZNF112,ZNF180,ZNF254,ZNF253,ZNF780A,ZNF100
	Proteoglycans in cancer	KEGG:05205	0.000600031	3.22183	205	212	18	8161	VAV3,WNT6,CAMK2B,TGFB2,WNT5B,WNT4,PRKACB,WNT3A,PIK3R3,PIK3R1,ANK3,ITGAV,ANK1,WNT5A,FZD6,SOS1,GAB1,PLCE1
	Breast cancer	KEGG:05224	0.0027402	2.56222	147	212	14	8161	FGF1,KIT,WNT6,WNT5B,WNT4,WNT3A,PIK3R3,PIK3R1,PTEN,WNT5A,BRCA2,FZD6,SOS1,POLK
	Gastric cancer	KEGG:05226	0.012333	1.90893	148	212	13	8161	FGF1,WNT6,TGFB2,WNT5B,WNT4,WNT3A,PIK3R3,PIK3R1,WNT5A,FZD6,SOS1,GAB1,POLK
	Melanogenesis	KEGG:04916	0.0289413	1.53848	101	212	10	8161	KIT,WNT6,CAMK2B,WNT5B,WNT4,PRKACB,WNT3A,PLCB1,WNT5A,FZD6
	Human papillomavirus infection	KEGG:05165	0.0383317	1.41644	331	212	20	8161	COL6A6,WNT6,WNT5B,WNT4,TLR3,PRKACB,WNT3A,PIK3R3,PIK3R1,MAML2,PTEN,LFNG,ITGB8,ITGAV,WNT5A,FZD6,SOS1,ITGB6,PPP2R3A,ATM
	Hepatocellular carcinoma	KEGG:05225	0.0386307	1.41307	166	212	13	8161	WNT6,TGFB2,WNT5B,WNT4,WNT3A,PIK3R3,PIK3R1,PTEN,WNT5A,FZD6,SOS1,GAB1,POLK
	Wnt signaling pathway	KEGG:04310	0.04862	1.31318	170	212	13	8161	WNT6,CAMK2B,WNT5B,WNT4,PRKACB,SERPINF1,WNT3A,PLCB1,DAAM1,LGR6,TBL1XR1,WNT5A,FZD6
REAC	Generic Transcription Pathway	REAC:R-HSA-212436	0.0110931	1.95495	1222	298	58	10790	KIT,ZNF429,MAP2K6,ZNF320,MAF,SESN3,TP73,CAMK2B,TP53INP1,ZNF680,ZNF540,ZNF658,ZNF273,ZNF546,USP2,RRM2B,ZNF439,SERPINB13,RORA,ZFP14,ZNF25,LIFR,ZNF214,ZNF709,ZNF92,ZNF138,FBXO32,ZNF713,MAML2,ZFP37,ZNF20,PTEN,ZNF10,ZNF484,ZNF704,NR1D2,ZNF136,ZNF678,ZNF606,CDK1,ZNF440,CAMK4,ZNF184,ZNF43,ZNF519,ZNF354C,DEK,PCGF5,PRKAA2,ZNF112,ZNF180,TBL1XR1,ZNF254,ZNF483,ZNF253,ATXN3,ATM,ZNF100
	RNA Polymerase II Transcription	REAC:R-HSA-73857	0.0460894	1.3364	1343	298	60	10790	KIT,ZNF429,MAP2K6,ZNF320,MAF,SESN3,TP73,CAMK2B,TP53INP1,ZNF680,ZNF540,ZNF658,ZNF273,ZNF546,USP2,RRM2B,ZNF439,SERPINB13,RORA,ZFP14,ZNF25,LIFR,ZNF214,ZNF709,ZNF92,ZNF138,FBXO32,ZNF713,MAML2,ZFP37,MLLT3,EAF2,ZNF20,PTEN,ZNF10,ZNF484,ZNF704,NR1D2,ZNF136,ZNF678,ZNF606,CDK1,ZNF440,CAMK4,ZNF184,ZNF43,ZNF519,ZNF354C,DEK,PCGF5,PRKAA2,ZNF112,ZNF180,TBL1XR1,ZNF254,ZNF483,ZNF253,ATXN3,ATM,ZNF100
WP	Breast cancer pathway	WP:WP4262	0.000684803	3.16443	154	220	16	8133	FGF1,KIT,WNT6,WNT5B,WNT4,WNT3A,PIK3R3,PIK3R1,PTEN,CETN3,WNT5A,BRCA2,FZD6,SOS1,ATM,POLK
	Embryonic stem cell pluripotency pathways	WP:WP3931	0.00251258	2.59988	116	220	13	8133	FGF1,MAP2K6,WNT6,WNT5B,WNT4,LIFR,WNT3A,IL6ST,PTEN,WNT5A,FZD6,SOS1,GAB1
	Nuclear receptors meta-pathway	WP:WP2882	0.00665309	2.17698	313	220	22	8133	CYP1B1,UGT1A7,SLC2A5,TGFB2,ALDH3A1,UGT1A1,SLCA12,UGT1A6,ARL5B,SLCA10,PDK4,SLC2A13,PRRRG4,TSC22D3,SLC26A2,CDK1,SLC2A4,KTN1,SLC39A10,FGD4,POLK,CAVIN2
	DNA damage response (only ATM dependent)	WP:WP710	0.032981	1.48174	110	220	11	8133	WNT6,TP73,WNT5B,WNT4,WNT3A,PIK3R3,PIK3R1,PTEN,WNT5A,SOS1,ATM

## Sheet: DN (stiff vs native)
Supplementary data 8. GO terms in Endo180-KO-acini (stiff-BM versus native-BM)
Source	Term name	Term ID	Adjusted p value	Negative log10 adjusted p value	Term size	Query size	Intersection size	Effective domain size	Intersections
GO:MF	structural constituent of skin epidermis	GO:0030280	5.2217e-08	7.28219	37	136	8	20166	KRT81,KRT1,PI3,KRT6B,SPRR2E,KRT6C,KRT75,KRT6A
	receptor ligand activity	GO:0048018	2.03294e-06	5.69188	500	252	25	20166	CSF3,CXCL1,CXCL8,GREM1,CDC42EP2,PTHLH,BMP6,IL1B,IL1A,GAL,CXCL3,HBEGF,CXCL2,IL32,TGFA,WNT10B,IFNK,VGF,INHBA,NGF,EDN1,METRNL,SEMA7A,IL11,BMP2
	signaling receptor regulator activity	GO:0030545	2.40488e-06	5.61891	543	252	26	20166	CSF3,CXCL1,CXCL8,GREM1,CDC42EP2,PTHLH,BMP6,IL1B,IL1A,GAL,CXCL3,HBEGF,CXCL2,IL32,TGFA,WNT10B,IFNK,VGF,INHBA,NGF,EDN1,METRNL,FST,SEMA7A,IL11,BMP2
	signaling receptor activator activity	GO:0030546	2.79477e-06	5.55365	508	252	25	20166	CSF3,CXCL1,CXCL8,GREM1,CDC42EP2,PTHLH,BMP6,IL1B,IL1A,GAL,CXCL3,HBEGF,CXCL2,IL32,TGFA,WNT10B,IFNK,VGF,INHBA,NGF,EDN1,METRNL,SEMA7A,IL11,BMP2
	molecular function regulator activity	GO:0098772	1.78008e-05	4.74956	1967	256	54	20166	PI3,CSF3,CXCL1,CXCL8,A2ML1,ID4,SERPINB2,GREM1,CDC42EP2,PTHLH,BMP6,RAPGEF3,IL1B,ID2,NCF2,SLPI,IL1A,GAL,SNCB,CXCL3,PPP2R2C,ID1,RGS16,HBEGF,CXCL2,IL32,SERPINB3,TGFA,SPRY4,PREX1,WNT10B,RAB3IL1,JUN,SOCS3,RASA4B,IFNK,VGF,INHBA,DLC1,SERPINB8,NCF1,NGF,EDN1,GPRC5A,METRNL,FST,BCAR3,SEMA7A,IL11,SOCS1,TBC1D30,ADRB2,BMP2,SH2D3A
	cytokine activity	GO:0005125	2.44102e-05	4.61243	237	252	16	20166	CSF3,CXCL1,CXCL8,GREM1,BMP6,IL1B,IL1A,CXCL3,CXCL2,IL32,WNT10B,IFNK,INHBA,EDN1,IL11,BMP2
	signaling receptor binding	GO:0005102	0.00132207	2.87875	1555	266	43	20166	H0YIP3,ESM1,ITGB3,CSF3,CXCL1,CXCL8,ICAM4,GREM1,S100A8,CDC42EP2,PIK3AP1,PTHLH,BMP6,IL1B,FZD8,IL1A,GAL,CXCL3,DLL4,RELN,HBEGF,CXCL2,IL32,TGFA,IGFL1,THBS1,WNT10B,IFNK,VGF,INHBA,ARNT2,NGF,EDN1,METRNL,FST,SEMA7A,S100A9,IL11,DLL3,SOCS1,BMP2,ECM1,DSCAM
	CXCR chemokine receptor binding	GO:0045236	0.00222458	2.65275	18	131	4	20166	CXCL1,CXCL8,CXCL3,CXCL2
	growth factor receptor binding	GO:0070851	0.00310719	2.50763	140	142	8	20166	ESM1,ITGB3,CSF3,GREM1,IL1B,IL1A,HBEGF,TGFA
	protein tyrosine/threonine phosphatase activity	GO:0008330	0.00694012	2.15863	10	103	3	20166	DUSP4,DUSP5,DUSP2
	[heparan sulfate]-glucosamine 3-sulfotransferase 1 activity	GO:0008467	0.00954645	2.02016	7	172	3	20166	HS3ST3A1,HS3ST2,HS3ST1
	MAP kinase tyrosine/serine/threonine phosphatase activity	GO:0017017	0.016357	1.7863	13	103	3	20166	DUSP4,DUSP5,DUSP2
	cytokine receptor binding	GO:0005126	0.0195113	1.70971	277	93	8	20166	ITGB3,CSF3,CXCL1,CXCL8,GREM1,IL1B,IL1A,CXCL3
	growth factor activity	GO:0008083	0.0204386	1.68955	165	252	10	20166	CSF3,CXCL1,BMP6,HBEGF,TGFA,VGF,INHBA,NGF,IL11,BMP2
	MAP kinase phosphatase activity	GO:0033549	0.0458096	1.33904	18	103	3	20166	DUSP4,DUSP5,DUSP2
GO:BP	epithelium development	GO:0060429	7.50843e-18	17.1245	1208	265	61	21092	KRT81,KRT1,RHCG,LCE3D,HES5,SPRR1B,ID4,SPRR2D,KRT6B,IVL,SPRR2E,KRT6C,GREM1,SNAI1,BMP6,RAPGEF3,IL1B,EDNRA,ID2,SLC44A4,HS3ST3A1,HOXD13,IL1A,GAL,SPRR3,DLL4,MAFF,ID1,ZBED2,KRT75,MESP1,TGM1,PRDM1,HBEGF,ALOX15B,AQP3,KRT6A,CARMIL2,MICAL2,WNT10B,JUN,SOCS3,XDH,ROBO4,ARG2,INHBA,SULT2B1,EPHA1,DLC1,EDN1,FOXF2,OSR1,FOXC2,FST,NOG,DLL3,BMP2,FOXD1,PLXNA2,CEACAM1,FAM20C
	tissue development	GO:0009888	8.86088e-17	16.0525	1973	265	77	21092	KRT81,KRT1,ITGB3,RHCG,LCE3D,HES5,SPRR1B,ID4,SPRR2D,KRT6B,IVL,SPRR2E,KRT6C,GREM1,MYH14,SNAI1,PTHLH,BMP6,RAPGEF3,IL1B,DUSP4,EDNRA,ID2,SLC44A4,HS3ST3A1,HOXD13,IL1A,DUSP5,GAL,SPRR3,DLL4,MAFF,DUSP2,ID1,ZBED2,KRT75,KLK7,MESP1,TGM1,PRDM1,HBEGF,ALOX15B,AQP3,KRT6A,SERPINB3,CARMIL2,FZD9,MICAL2,WNT10B,DLX2,PTGS2,JUN,SOCS3,XDH,ROBO4,ARG2,INHBA,SULT2B1,EPHA1,DLC1,EDN1,NR4A1,FOXF2,OSR1,FOXC2,FST,NOG,SEMA7A,DLL…
	epidermis development	GO:0008544	2.33255e-14	13.6322	368	197	28	21092	KRT81,KRT1,LCE3D,HES5,SPRR1B,SPRR2D,KRT6B,IVL,SPRR2E,KRT6C,SNAI1,PTHLH,SLC44A4,IL1A,GAL,SPRR3,MAFF,ZBED2,KRT75,KLK7,TGM1,ALOX15B,AQP3,KRT6A,WNT10B,INHBA,SULT2B1,EPHA1
	epithelial cell differentiation	GO:0030855	1.09615e-13	12.9601	711	265	42	21092	KRT81,KRT1,RHCG,LCE3D,HES5,SPRR1B,SPRR2D,KRT6B,IVL,SPRR2E,KRT6C,GREM1,BMP6,RAPGEF3,IL1B,EDNRA,ID2,SLC44A4,IL1A,SPRR3,MAFF,ID1,ZBED2,KRT75,MESP1,TGM1,PRDM1,ALOX15B,AQP3,KRT6A,WNT10B,JUN,XDH,ROBO4,SULT2B1,EPHA1,OSR1,FOXC2,FST,BMP2,CEACAM1,FAM20C
	epidermal cell differentiation	GO:0009913	1.57803e-13	12.8019	239	136	20	21092	KRT81,KRT1,LCE3D,HES5,SPRR1B,SPRR2D,KRT6B,IVL,SPRR2E,KRT6C,SLC44A4,IL1A,SPRR3,MAFF,ZBED2,KRT75,TGM1,ALOX15B,AQP3,KRT6A
	keratinization	GO:0031424	4.09045e-13	12.3882	83	136	14	21092	KRT81,KRT1,LCE3D,SPRR1B,SPRR2D,KRT6B,IVL,SPRR2E,KRT6C,IL1A,SPRR3,KRT75,TGM1,KRT6A
	anatomical structure formation involved in morphogenesis	GO:0048646	6.12336e-13	12.213	1157	269	53	21092	ESM1,KRT1,ITGB3,CXCL8,HES5,GREM1,SNAI1,TNFAIP3,RAPGEF3,IL1B,DUSP4,SH2D2A,EDNRA,FZD8,SLC44A4,IL1A,DUSP5,DLL4,RELN,DUSP2,ID1,MESP1,NRCAM,ADAM8,TGFA,FLNC,F3,THBS1,WNT10B,PTGS2,UNC13D,JUN,ROBO4,INHBA,EHD1,EPHA1,DLC1,EDN1,NR4A1,OSR1,FOXC2,NOG,ETS1,DLL3,SPHK1,BMP2,FOXD1,ECM1,PLXNA2,CEACAM1,FAM20C,DSCAM,FJX1
	keratinocyte differentiation	GO:0030216	1.72402e-12	11.7635	169	136	17	21092	KRT81,KRT1,LCE3D,SPRR1B,SPRR2D,KRT6B,IVL,SPRR2E,KRT6C,IL1A,SPRR3,ZBED2,KRT75,TGM1,ALOX15B,AQP3,KRT6A
	skin development	GO:0043588	2.72511e-12	11.5646	305	197	24	21092	KRT81,KRT1,LCE3D,SPRR1B,SPRR2D,KRT6B,IVL,SPRR2E,KRT6C,SNAI1,IL1A,GAL,SPRR3,ZBED2,KRT75,TGM1,ALOX15B,ASPRV1,AQP3,KRT6A,WNT10B,GJB3,INHBA,EPHA1
	regulation of multicellular organismal development	GO:2000026	1.33255e-11	10.8753	1394	266	56	21092	KRT1,ITGB3,CSF3,CXCL8,HES5,ID4,GREM1,PTHLH,BMP6,TNFAIP3,RAPGEF3,IL1B,ID2,IL1A,GAL,DLL4,RELN,MAFF,ID1,ZBED2,MESP1,PRDM1,ALOX15B,AQP3,ADAM8,FZD9,F3,THBS1,WNT10B,DLX2,ZNF365,XDH,INHBA,SULT2B1,EPHA1,NGF,EDN1,OSR1,FOXC2,H4C6,FST,NOG,SEMA7A,ETS1,DLL3,SPHK1,HCLS1,SOCS1,ADRB2,BMP2,NEURL1,ECM1,PLXNA2,CEACAM1,FAM20C,DSCAM
	anatomical structure morphogenesis	GO:0009653	1.65194e-11	10.782	2722	269	83	21092	ESM1,KRT1,ITGB3,CXCL8,HES5,ID4,GREM1,MYH14,CDC42EP2,SNAI1,BMP6,TNFAIP3,RAPGEF3,IL1B,DUSP4,SH2D2A,EDNRA,ID2,FZD8,SLC44A4,HS3ST3A1,HOXD13,IL1A,DUSP5,DLL4,RELN,DUSP2,ID1,MESP1,PRDM1,HBEGF,NRCAM,AQP3,ADAM8,KRT6A,CARMIL2,TGFA,SPRY4,FLNC,F3,PREX1,THBS1,MICAL2,WNT10B,DLX2,ZNF365,PTGS2,UNC13D,JUN,SOCS3,XDH,ROBO4,BCL2L1,HOXB9,INHBA,EHD1,EPHA1,DLC1,NGF,EDN1,COL13A1,NR4A1,FOXF2,OSR1,FOXC2,FST,NOG,BCAR3,SEMA…
	tube morphogenesis	GO:0035239	1.68741e-11	10.7728	863	264	43	21092	ESM1,KRT1,ITGB3,CXCL8,HES5,GREM1,TNFAIP3,RAPGEF3,IL1B,SH2D2A,EDNRA,ID2,FZD8,HS3ST3A1,HOXD13,IL1A,DLL4,ID1,MESP1,PRDM1,NRCAM,ADAM8,TGFA,F3,THBS1,MICAL2,PTGS2,JUN,XDH,ROBO4,EPHA1,DLC1,EDN1,NR4A1,OSR1,FOXC2,NOG,ETS1,SPHK1,BMP2,FOXD1,ECM1,CEACAM1
	positive regulation of developmental process	GO:0051094	3.60688e-11	10.4429	1337	266	54	21092	ITGB3,CSF3,CXCL8,ID4,GREM1,SNAI1,BMP6,RAPGEF3,IL1B,ID2,IL1A,GAL,RELN,ZBED2,MESP1,ALOX15B,NRCAM,ADAM8,SERPINB3,FZD9,F3,PREX1,THBS1,WNT10B,DLX2,ZNF365,PTGS2,UNC13D,SOCS3,INHBA,EHD1,SULT2B1,NGF,EDN1,METRNL,OSR1,FOXC2,FST,NOG,SEMA7A,ETS1,SPHK1,HCLS1,PLD6,SOCS1,ADRB2,BMP2,NEURL1,FOXD1,ECM1,PLXNA2,CEACAM1,FAM20C,DSCAM
	defense response	GO:0006952	6.14035e-11	10.2118	1742	264	62	21092	KRT1,PI3,CXCL1,CXCL8,GSDMA,S100A8,MMP3,CDC42EP2,PIK3AP1,BMP6,TNFAIP3,FOSL1,IL1B,PRSS3,NCF2,SLPI,SPRR2A,IL1A,IFI27,GAL,CXCL3,PTGES,KLK7,MX1,PRDM1,RNASE7,CXCL2,ADAM8,IL32,KRT6A,F3,THBS1,IFI6,OAS1,PTGS2,UNC13D,JUN,SOCS3,BDKRB1,IFNK,ARG2,VGF,BCL2L1,LCN2,INHBA,EPHA1,IRF9,NCF1,EDN1,METRNL,IRAK2,RELB,SEMA7A,ETS1,S100A9,SPHK1,SOCS1,MAPK8IP2,BMP2,TFR2,ECM1,CEACAM1
	regulation of developmental process	GO:0050793	2.04231e-10	9.68988	2499	271	77	21092	KRT1,ITGB3,CSF3,CXCL8,HES5,ID4,GREM1,MYH14,CDC42EP2,SNAI1,KLK6,PTHLH,BMP6,TNFAIP3,RAPGEF3,IL1B,ID2,HOXD13,IL1A,GAL,DLL4,RELN,MAFF,ID1,ZBED2,MESP1,PRDM1,ALOX15B,NRCAM,AQP3,ADAM8,SERPINB3,FZD9,SPRY4,F3,PREX1,THBS1,WNT10B,DLX2,ZNF365,PTGS2,UNC13D,SOCS3,XDH,BCL2L1,INHBA,EHD1,SULT2B1,EPHA1,DLC1,NGF,EDN1,METRNL,OSR1,FOXC2,H4C6,FST,NOG,SEMA7A,ETS1,DLL3,SPHK1,HCLS1,PLD6,SOCS1,APC2,ADRB2,BMP2,NEURL1,FOXD1…
	blood vessel development	GO:0001568	3.0054e-10	9.5221	703	264	37	21092	ESM1,KRT1,ITGB3,CXCL8,GREM1,TNFAIP3,FOSL1,RAPGEF3,IL1B,SH2D2A,EDNRA,FZD8,IL1A,DLL4,ID1,MESP1,PRDM1,NRCAM,ADAM8,TGFA,F3,THBS1,PTGS2,JUN,SOCS3,XDH,ROBO4,EPHA1,EDN1,NR4A1,OSR1,FOXC2,NOG,ETS1,SPHK1,ECM1,CEACAM1
	tube development	GO:0035295	4.53337e-10	9.34358	1076	264	46	21092	ESM1,KRT1,ITGB3,CXCL8,HES5,GREM1,TNFAIP3,RAPGEF3,IL1B,SH2D2A,EDNRA,ID2,FZD8,HS3ST3A1,HOXD13,IL1A,DLL4,ID1,MESP1,PRDM1,NRCAM,ADAM8,TGFA,F3,THBS1,MICAL2,PTGS2,JUN,XDH,ROBO4,ARG2,EPHA1,DLC1,EDN1,NR4A1,FOXF2,OSR1,FOXC2,NOG,ETS1,SPHK1,BMP2,FOXD1,ECM1,PLXNA2,CEACAM1
	response to external stimulus	GO:0009605	4.80918e-10	9.31793	2814	266	81	21092	KRT1,ITGB3,PI3,CSF3,CXCL1,CXCL8,GSDMA,SERPINB2,GREM1,S100A8,MMP3,CDC42EP2,PIK3AP1,BMP6,TNFAIP3,FOSL1,IL1B,EDNRA,ID2,PRSS3,NCF2,SLPI,SPRR2A,IL1A,IFI27,CXCL3,RELN,PTGES,UPP1,KLK7,MX1,PRDM1,RNASE7,HBEGF,ODC1,NRCAM,CDA,AQP3,CXCL2,ADAM8,KRT6A,F3,PREX1,THBS1,IFI6,OAS1,PTGS2,UNC13D,JUN,SOCS3,BDKRB1,ROBO4,IFNK,ARG2,VGF,BCL2L1,HOXB9,LCN2,EPHA1,PRDM12,IRF9,NCF1,EDN1,NR4A1,METRNL,IRAK2,NOG,RELB,SEMA7A,ETS1,…
	regulation of cell population proliferation	GO:0042127	5.79149e-10	9.23721	1683	264	59	21092	ESM1,ITGB3,CSF3,CXCL1,CXCL8,NCCRP1,HES5,ID4,GREM1,PTHLH,BMP6,TNFAIP3,FOSL1,IL1B,ID2,HOXD13,DHRS2,IL1A,GAL,DLL4,PTGES,ID1,TGM1,PRDM1,HBEGF,ALOX15B,ODC1,ADRA1D,KRT6A,SERPINB3,TGFA,FZD9,SLC16A2,F3,THBS1,WNT10B,PTGS2,JUN,XDH,IFNK,ARG2,BCL2L1,INHBA,SULT2B1,DLC1,NGF,EDN1,NR4A1,OSR1,LGALS7B,NOG,ETS1,IL11,SPHK1,HCLS1,BMP2,NEURL1,ECM1,CEACAM1
	cell population proliferation	GO:0008283	6.4033e-10	9.1936	1988	264	65	21092	ESM1,ITGB3,CSF3,CXCL1,CXCL8,NCCRP1,HES5,ID4,GREM1,PTHLH,BMP6,TNFAIP3,FOSL1,IL1B,SH2D2A,EDNRA,ID2,HOXD13,DHRS2,IL1A,GAL,DLL4,PTGES,ID1,TGM1,PRDM1,HBEGF,ALOX15B,ODC1,ADRA1D,KRT6A,SERPINB3,TGFA,FZD9,SLC16A2,F3,THBS1,WNT10B,PTGS2,JUN,XDH,IFNK,ARG2,BCL2L1,INHBA,SULT2B1,EPHA1,DLC1,NGF,EDN1,NR4A1,FAM83A,OSR1,LGALS7B,FOXC2,FST,NOG,ETS1,IL11,SPHK1,HCLS1,BMP2,NEURL1,ECM1,CEACAM1
	vasculature development	GO:0001944	1.10543e-09	8.95647	734	264	37	21092	ESM1,KRT1,ITGB3,CXCL8,GREM1,TNFAIP3,FOSL1,RAPGEF3,IL1B,SH2D2A,EDNRA,FZD8,IL1A,DLL4,ID1,MESP1,PRDM1,NRCAM,ADAM8,TGFA,F3,THBS1,PTGS2,JUN,SOCS3,XDH,ROBO4,EPHA1,EDN1,NR4A1,OSR1,FOXC2,NOG,ETS1,SPHK1,ECM1,CEACAM1
	regulation of multicellular organismal process	GO:0051239	1.27382e-09	8.89489	2753	266	79	21092	KRT1,ITGB3,CSF3,CXCL8,HES5,ID4,SERPINB2,GREM1,NAV3,SNAI1,PTHLH,BMP6,TNFAIP3,RAPGEF3,IL1B,EDNRA,ID2,HOXD13,IL1A,GAL,DLL4,RELN,KCNJ12,MAFF,PTGES,ID1,ZBED2,MESP1,PRDM1,HBEGF,ALOX15B,AQP3,ADRA1D,ADAM8,IL32,SERPINB3,FZD9,F3,THBS1,WNT10B,DLX2,OAS1,ZNF365,PTGS2,JUN,XDH,ARG2,LCN2,INHBA,SULT2B1,EPHA1,GPR3,NCF1,NGF,EDN1,NR4A1,OSR1,LGALS7B,HTR1D,FOXC2,H4C6,FST,NOG,RELB,SEMA7A,ETS1,DLL3,SPHK1,HCLS1,SOCS1,ADR…
	blood vessel morphogenesis	GO:0048514	4.36577e-09	8.35994	616	264	33	21092	ESM1,KRT1,ITGB3,CXCL8,GREM1,TNFAIP3,RAPGEF3,IL1B,SH2D2A,EDNRA,FZD8,IL1A,DLL4,ID1,PRDM1,NRCAM,ADAM8,TGFA,F3,THBS1,PTGS2,JUN,XDH,ROBO4,EPHA1,EDN1,NR4A1,FOXC2,NOG,ETS1,SPHK1,ECM1,CEACAM1
	regulation of cell differentiation	GO:0045595	6.3621e-09	8.1964	1587	271	56	21092	ITGB3,CSF3,HES5,ID4,GREM1,SNAI1,KLK6,PTHLH,BMP6,IL1B,ID2,IL1A,DLL4,RELN,MAFF,ID1,ZBED2,MESP1,PRDM1,ALOX15B,NRCAM,AQP3,ADAM8,SERPINB3,SPRY4,PREX1,WNT10B,DLX2,ZNF365,PTGS2,UNC13D,SOCS3,XDH,INHBA,SULT2B1,NGF,EDN1,METRNL,OSR1,H4C6,FST,NOG,SEMA7A,ETS1,DLL3,HCLS1,SOCS1,APC2,BMP2,NEURL1,PLXNA2,CEACAM1,FAM20C,DSCAM,CCDC85B,SMOC1
	angiogenesis	GO:0001525	1.00086e-08	7.99963	526	264	30	21092	ESM1,KRT1,ITGB3,CXCL8,GREM1,TNFAIP3,RAPGEF3,IL1B,SH2D2A,EDNRA,FZD8,IL1A,DLL4,ID1,NRCAM,ADAM8,TGFA,F3,THBS1,PTGS2,JUN,ROBO4,EPHA1,EDN1,NR4A1,FOXC2,ETS1,SPHK1,ECM1,CEACAM1
	regulation of epithelial cell differentiation	GO:0030856	1.53985e-08	7.81252	151	264	17	21092	HES5,BMP6,IL1B,IL1A,MAFF,ID1,ZBED2,MESP1,ALOX15B,AQP3,WNT10B,XDH,SULT2B1,OSR1,FST,BMP2,CEACAM1
	positive regulation of cell population proliferation	GO:0008284	1.03241e-07	6.98615	954	261	39	21092	ESM1,ITGB3,CSF3,NCCRP1,HES5,ID4,GREM1,PTHLH,BMP6,TNFAIP3,FOSL1,IL1B,ID2,IL1A,DLL4,ID1,TGM1,HBEGF,ODC1,ADRA1D,KRT6A,SERPINB3,TGFA,FZD9,F3,THBS1,WNT10B,PTGS2,JUN,BCL2L1,EDN1,NR4A1,OSR1,NOG,IL11,SPHK1,HCLS1,BMP2,ECM1
	circulatory system development	GO:0072359	2.68848e-07	6.57049	1109	264	42	21092	ESM1,KRT1,ITGB3,CXCL8,GREM1,SNAI1,TNFAIP3,FOSL1,RAPGEF3,IL1B,SH2D2A,EDNRA,ID2,FZD8,IL1A,DLL4,ID1,MESP1,PRDM1,NRCAM,ADAM8,TGFA,F3,THBS1,MICAL2,PTGS2,JUN,SOCS3,XDH,ROBO4,EPHA1,DLC1,EDN1,NR4A1,OSR1,FOXC2,NOG,ETS1,SPHK1,BMP2,ECM1,CEACAM1
	locomotion	GO:0040011	3.92253e-07	6.40643	1349	266	47	21092	ITGB3,CXCL1,CXCL8,GREM1,S100A8,NAV3,SNAI1,FOSL1,IL1B,EDNRA,JPH3,IL1A,CXCL3,DLL4,RELN,HBEGF,ALOX15B,NRCAM,CXCL2,ADAM8,SERPINB3,CARMIL2,F3,PREX1,THBS1,PTGS2,JUN,BDKRB1,ROBO4,HOXB9,EPHA1,DLC1,EDN1,NR4A1,HTR1D,FOXC2,NOG,SEMA7A,ETS1,S100A9,SPHK1,BMP2,FOXD1,ECM1,PLXNA2,CEACAM1,DSCAM
	biological process involved in interspecies interaction between organisms	GO:0044419	4.17316e-07	6.37954	1675	210	46	21092	KRT1,ITGB3,PI3,CSF3,CXCL1,CXCL8,E9PSI1,GSDMA,S100A8,CDC42EP2,BMP6,TNFAIP3,FOSL1,IL1B,PRSS3,NCF2,SLPI,SPRR2A,IL1A,IFI27,CXCL3,KLK7,MX1,PRDM1,RNASE7,ODC1,CXCL2,ADAM8,KRT6A,SERPINB3,IFI6,OAS1,PTGS2,UNC13D,JUN,BDKRB1,IFNK,ARG2,VGF,BCL2L1,LCN2,EPHA1,IRF9,NCF1,EDN1,NR4A1
	inflammatory response	GO:0006954	4.72437e-07	6.32566	786	261	34	21092	KRT1,CXCL1,CXCL8,S100A8,MMP3,PIK3AP1,BMP6,TNFAIP3,IL1B,IL1A,GAL,CXCL3,PTGES,CXCL2,ADAM8,F3,THBS1,PTGS2,UNC13D,JUN,SOCS3,BDKRB1,EPHA1,NCF1,METRNL,IRAK2,RELB,SEMA7A,ETS1,S100A9,SPHK1,BMP2,TFR2,ECM1
	peptide cross-linking	GO:0018149	4.76121e-07	6.32228	37	155	8	21092	KRT1,PI3,SPRR1B,IVL,SPRR2E,SPRR3,TGM1,THBS1
	response to external biotic stimulus	GO:0043207	6.88219e-07	6.16227	1516	210	43	21092	KRT1,PI3,CSF3,CXCL1,CXCL8,GSDMA,S100A8,CDC42EP2,BMP6,TNFAIP3,FOSL1,IL1B,PRSS3,NCF2,SLPI,SPRR2A,IL1A,IFI27,CXCL3,KLK7,MX1,PRDM1,RNASE7,ODC1,CDA,CXCL2,ADAM8,KRT6A,IFI6,OAS1,PTGS2,UNC13D,BDKRB1,IFNK,ARG2,VGF,BCL2L1,LCN2,EPHA1,IRF9,NCF1,EDN1,NR4A1
	positive regulation of cell differentiation	GO:0045597	9.5176e-07	6.02147	877	266	36	21092	ITGB3,CSF3,ID4,SNAI1,BMP6,IL1B,ID2,RELN,ZBED2,MESP1,ALOX15B,NRCAM,ADAM8,SERPINB3,PREX1,WNT10B,DLX2,ZNF365,PTGS2,UNC13D,SOCS3,INHBA,SULT2B1,NGF,EDN1,METRNL,SEMA7A,ETS1,HCLS1,SOCS1,BMP2,NEURL1,PLXNA2,CEACAM1,FAM20C,DSCAM
	antimicrobial humoral response	GO:0019730	1.19886e-06	5.92123	126	136	11	21092	PI3,CXCL1,CXCL8,PRSS3,SLPI,SPRR2A,CXCL3,KLK7,RNASE7,CXCL2,KRT6A
	response to biotic stimulus	GO:0009607	1.47822e-06	5.83026	1554	210	43	21092	KRT1,PI3,CSF3,CXCL1,CXCL8,GSDMA,S100A8,CDC42EP2,BMP6,TNFAIP3,FOSL1,IL1B,PRSS3,NCF2,SLPI,SPRR2A,IL1A,IFI27,CXCL3,KLK7,MX1,PRDM1,RNASE7,ODC1,CDA,CXCL2,ADAM8,KRT6A,IFI6,OAS1,PTGS2,UNC13D,BDKRB1,IFNK,ARG2,VGF,BCL2L1,LCN2,EPHA1,IRF9,NCF1,EDN1,NR4A1
	response to other organism	GO:0051707	2.21173e-06	5.65527	1513	210	42	21092	KRT1,PI3,CSF3,CXCL1,CXCL8,GSDMA,S100A8,CDC42EP2,BMP6,TNFAIP3,FOSL1,IL1B,PRSS3,NCF2,SLPI,SPRR2A,IL1A,IFI27,CXCL3,KLK7,MX1,PRDM1,RNASE7,ODC1,CXCL2,ADAM8,KRT6A,IFI6,OAS1,PTGS2,UNC13D,BDKRB1,IFNK,ARG2,VGF,BCL2L1,LCN2,EPHA1,IRF9,NCF1,EDN1,NR4A1
	cell migration	GO:0016477	3.0323e-06	5.51823	1498	264	48	21092	ITGB3,CXCL1,CXCL8,GREM1,S100A8,NAV3,S100P,SNAI1,TNFAIP3,IL1B,EDNRA,PRSS3,IL1A,CXCL3,DLL4,RELN,ID1,MESP1,HBEGF,ALOX15B,NRCAM,CXCL2,ADAM8,SERPINB3,CARMIL2,F3,PREX1,THBS1,PTGS2,JUN,BDKRB1,ROBO4,HOXB9,EPHA1,DLC1,EDN1,NR4A1,FOXC2,NOG,SEMA7A,ETS1,S100A9,SPHK1,APC2,BMP2,ECM1,PLXNA2,CEACAM1
	negative regulation of cell population proliferation	GO:0008285	3.46752e-06	5.45998	711	264	31	21092	CXCL1,CXCL8,GREM1,PTHLH,TNFAIP3,FOSL1,IL1B,DHRS2,IL1A,GAL,DLL4,PTGES,ALOX15B,SLC16A2,THBS1,WNT10B,PTGS2,JUN,XDH,IFNK,ARG2,INHBA,SULT2B1,DLC1,NGF,LGALS7B,NOG,ETS1,BMP2,NEURL1,CEACAM1
	positive regulation of multicellular organismal process	GO:0051240	4.77276e-06	5.32123	1507	266	48	21092	ITGB3,CXCL8,ID4,GREM1,SNAI1,BMP6,RAPGEF3,IL1B,ID2,IL1A,GAL,RELN,ZBED2,MESP1,ALOX15B,ADRA1D,ADAM8,IL32,SERPINB3,FZD9,F3,THBS1,WNT10B,OAS1,ZNF365,PTGS2,LCN2,INHBA,GPR3,NGF,EDN1,OSR1,FOXC2,FST,NOG,SEMA7A,ETS1,SPHK1,HCLS1,SOCS1,ADRB2,BMP2,NEURL1,FOXD1,ECM1,PLXNA2,FAM20C,DSCAM
	immune system process	GO:0002376	6.12796e-06	5.21268	2842	246	68	21092	KRT1,ITGB3,PI3,CSF3,CXCL1,CXCL8,HES5,GREM1,S100A8,CDC42EP2,PIK3AP1,BMP6,TNFAIP3,RAPGEF3,IL1B,SH2D2A,ID2,FZD8,PRSS3,NCF2,SLPI,DHRS2,SPRR2A,SLAMF9,IL1A,IFI27,GAL,CXCL3,DLL4,KRT75,KLK7,MX1,PRDM1,RNASE7,AQP3,CXCL2,ADAM8,IL32,KRT6A,FZD9,PREX1,THBS1,WNT10B,IFI6,OAS1,UNC13D,JUN,BDKRB1,IFNK,ARG2,LCN2,INHBA,EPHA1,IRF9,NCF1,EDN1,LGALS7B,IRAK2,H4C6,FST,RELB,SEMA7A,ETS1,S100A9,IL11,SPHK1,HCLS1,SOCS1
	regulation of protein phosphorylation	GO:0001932	7.58345e-06	5.12013	1095	264	39	21092	ITGB3,CSF3,HES5,GREM1,BMP6,TNFAIP3,RAPGEF3,IL1B,FZD8,RELN,HBEGF,ADAM8,SERPINB3,TGFA,SPRY4,THBS1,PTGS2,JUN,SOCS3,BDKRB1,XDH,IFNK,INHBA,NCF1,NGF,EDN1,GPRC5A,NOG,BCAR3,SEMA7A,IL11,SPHK1,HCLS1,SOCS1,ADRB2,BMP2,NEURL1,SH2D3A,CEACAM1
	cell motility	GO:0048870	7.64609e-06	5.11656	1698	264	51	21092	ITGB3,CXCL1,CXCL8,GREM1,S100A8,NAV3,S100P,SNAI1,TNFAIP3,IL1B,EDNRA,DNAH3,PRSS3,IL1A,CXCL3,DLL4,RELN,ID1,MESP1,HBEGF,ALOX15B,NRCAM,CXCL2,ADAM8,SERPINB3,CFAP157,CARMIL2,F3,PREX1,THBS1,PTGS2,JUN,BDKRB1,ROBO4,HOXB9,EPHA1,DLC1,EDN1,NR4A1,FOXC2,NOG,SEMA7A,ETS1,S100A9,SPHK1,APC2,BMP2,NEURL1,ECM1,PLXNA2,CEACAM1
	regulation of anatomical structure morphogenesis	GO:0022603	1.18806e-05	4.92516	919	266	35	21092	KRT1,ITGB3,CXCL8,GREM1,MYH14,CDC42EP2,TNFAIP3,RAPGEF3,IL1B,HOXD13,IL1A,RELN,ID1,MESP1,SPRY4,F3,PREX1,THBS1,UNC13D,EPHA1,DLC1,NGF,EDN1,OSR1,FOXC2,NOG,SEMA7A,ETS1,SPHK1,PLD6,BMP2,ECM1,PLXNA2,CEACAM1,DSCAM
	chemotaxis	GO:0006935	1.24881e-05	4.9035	620	266	28	21092	ITGB3,CXCL1,CXCL8,GREM1,S100A8,FOSL1,IL1B,EDNRA,CXCL3,RELN,HBEGF,NRCAM,CXCL2,ADAM8,F3,PREX1,THBS1,ROBO4,HOXB9,EPHA1,EDN1,NR4A1,NOG,SEMA7A,S100A9,FOXD1,PLXNA2,DSCAM
	regulation of signal transduction	GO:0009966	1.29118e-05	4.88901	2968	265	73	21092	ESM1,ITGB3,CSF3,CXCL8,HES5,GREM1,S100A8,SNAI1,KLK6,PIK3AP1,BMP6,TNFAIP3,IL1B,DUSP4,FZD8,IL1A,DUSP5,DLL4,RELN,DUSP2,MESP1,HIC1,RGS16,HBEGF,ALOX15B,ADRA1D,ADAM8,SERPINB3,TGFA,FZD9,SPRY4,F3,PREX1,THBS1,WNT10B,DLX2,IFI6,OAS1,PTGS2,JUN,SOCS3,XDH,RASA4B,IFNK,BCL2L1,INHBA,EPHA1,DLC1,GPR3,NCF1,NGF,EDN1,GPRC5A,BCL2L2-PABPN1,IRAK2,FST,NOG,BCAR3,SEMA7A,S100A9,IL11,SPHK1,HCLS1,SOCS1,MAPK8IP2,APC2,ADRB2,BMP2,…
	taxis	GO:0042330	1.33919e-05	4.87316	622	266	28	21092	ITGB3,CXCL1,CXCL8,GREM1,S100A8,FOSL1,IL1B,EDNRA,CXCL3,RELN,HBEGF,NRCAM,CXCL2,ADAM8,F3,PREX1,THBS1,ROBO4,HOXB9,EPHA1,EDN1,NR4A1,NOG,SEMA7A,S100A9,FOXD1,PLXNA2,DSCAM
	positive regulation of protein phosphorylation	GO:0001934	1.82337e-05	4.73912	743	256	30	21092	ITGB3,CSF3,HES5,GREM1,BMP6,RAPGEF3,IL1B,FZD8,RELN,HBEGF,ADAM8,TGFA,THBS1,PTGS2,IFNK,INHBA,NCF1,NGF,EDN1,GPRC5A,BCAR3,SEMA7A,IL11,SPHK1,HCLS1,SOCS1,ADRB2,BMP2,NEURL1,SH2D3A
	epithelial cell proliferation	GO:0050673	1.91799e-05	4.71715	441	264	23	21092	ITGB3,HES5,BMP6,TNFAIP3,ID2,DLL4,ID1,TGM1,TGFA,F3,THBS1,WNT10B,JUN,XDH,BCL2L1,EPHA1,NR4A1,OSR1,FST,NOG,BMP2,ECM1,CEACAM1
	defense response to other organism	GO:0098542	1.92616e-05	4.71531	1163	206	34	21092	KRT1,PI3,CXCL1,CXCL8,GSDMA,S100A8,CDC42EP2,TNFAIP3,IL1B,PRSS3,NCF2,SLPI,SPRR2A,IFI27,CXCL3,KLK7,MX1,PRDM1,RNASE7,CXCL2,ADAM8,KRT6A,IFI6,OAS1,UNC13D,IFNK,ARG2,VGF,BCL2L1,LCN2,EPHA1,IRF9,NCF1,EDN1
	animal organ morphogenesis	GO:0009887	2.0364e-05	4.69114	1066	269	38	21092	HES5,ID4,GREM1,SNAI1,BMP6,TNFAIP3,EDNRA,ID2,SLC44A4,HS3ST3A1,HOXD13,DLL4,MESP1,PRDM1,AQP3,TGFA,MICAL2,WNT10B,DLX2,JUN,HOXB9,INHBA,EPHA1,DLC1,EDN1,COL13A1,FOXF2,OSR1,FOXC2,FST,NOG,BCAR3,BMP2,FOXD1,CEACAM1,FAM20C,DSCAM,FJX1
	positive regulation of cell communication	GO:0010647	2.12566e-05	4.67251	1718	261	50	21092	ESM1,ITGB3,CSF3,HES5,GREM1,S100A8,KLK6,PIK3AP1,BMP6,TNFAIP3,IL1B,FZD8,IL1A,GAL,DLL4,RELN,MESP1,HIC1,HBEGF,ALOX15B,ADRA1D,ADAM8,TGFA,FZD9,F3,THBS1,WNT10B,PTGS2,JUN,XDH,INHBA,GPR3,NCF1,NGF,EDN1,NOG,BCAR3,SEMA7A,S100A9,IL11,SPHK1,HCLS1,SOCS1,MAPK8IP2,ADRB2,BMP2,TFR2,NEURL1,FOXD1,ECM1
	positive regulation of signaling	GO:0023056	2.29253e-05	4.63969	1722	261	50	21092	ESM1,ITGB3,CSF3,HES5,GREM1,S100A8,KLK6,PIK3AP1,BMP6,TNFAIP3,IL1B,FZD8,IL1A,GAL,DLL4,RELN,MESP1,HIC1,HBEGF,ALOX15B,ADRA1D,ADAM8,TGFA,FZD9,F3,THBS1,WNT10B,PTGS2,JUN,XDH,INHBA,GPR3,NCF1,NGF,EDN1,NOG,BCAR3,SEMA7A,S100A9,IL11,SPHK1,HCLS1,SOCS1,MAPK8IP2,ADRB2,BMP2,TFR2,NEURL1,FOXD1,ECM1
	morphogenesis of an epithelium	GO:0002009	2.60625e-05	4.58398	525	264	25	21092	HES5,ID4,GREM1,SNAI1,EDNRA,HS3ST3A1,HOXD13,DLL4,MESP1,HBEGF,KRT6A,CARMIL2,MICAL2,SOCS3,EPHA1,DLC1,EDN1,FOXF2,OSR1,FOXC2,FST,NOG,BMP2,FOXD1,CEACAM1
	response to oxygen-containing compound	GO:1901700	2.61582e-05	4.58239	1655	264	49	21092	ITGB3,CSF3,CXCL1,CXCL8,S100A8,MMP3,BMP6,TNFAIP3,FOSL1,RAPGEF3,IL1B,EDNRA,SLPI,HOXD13,IL1A,GAL,CXCL3,ID1,GRAMD1B,CDA,AQP3,CXCL2,THBS1,WNT10B,PTGS2,JUN,SOCS3,BDKRB1,GJB3,VGF,BCL2L1,INHBA,NCF1,EDN1,NR4A1,OSR1,HTR1D,FOXC2,IRAK2,TWNK,BCAR3,S100A9,SPHK1,SOCS1,CYP24A1,ADRB2,NEURL1,FOSB,CEACAM1
	regulation of phosphorylation	GO:0042325	2.80437e-05	4.55216	1237	266	41	21092	ITGB3,CSF3,HES5,GREM1,BMP6,TNFAIP3,RAPGEF3,IL1B,FZD8,RELN,HBEGF,ADAM8,SERPINB3,TGFA,SPRY4,THBS1,PTGS2,JUN,SOCS3,BDKRB1,XDH,IFNK,INHBA,EPHA1,NCF1,NGF,EDN1,GPRC5A,NOG,BCAR3,SEMA7A,IL11,SPHK1,HCLS1,SOCS1,ADRB2,BMP2,NEURL1,SH2D3A,CEACAM1,DSCAM
	positive regulation of signal transduction	GO:0009967	3.03899e-05	4.51727	1523	261	46	21092	ESM1,ITGB3,CSF3,HES5,GREM1,S100A8,KLK6,PIK3AP1,BMP6,TNFAIP3,IL1B,FZD8,IL1A,DLL4,RELN,MESP1,HIC1,HBEGF,ALOX15B,ADRA1D,ADAM8,TGFA,FZD9,F3,THBS1,WNT10B,JUN,XDH,INHBA,GPR3,NCF1,NGF,EDN1,BCAR3,SEMA7A,S100A9,IL11,SPHK1,HCLS1,SOCS1,MAPK8IP2,ADRB2,BMP2,NEURL1,FOXD1,ECM1
	regulation of phosphorus metabolic process	GO:0051174	3.12607e-05	4.505	1392	266	44	21092	ITGB3,CSF3,HES5,GREM1,BMP6,TNFAIP3,RAPGEF3,IL1B,FZD8,RELN,HBEGF,CDA,ADAM8,SERPINB3,TGFA,SPRY4,THBS1,PTGS2,JUN,SOCS3,BDKRB1,XDH,IFNK,INHBA,EPHA1,DLC1,NCF1,NGF,EDN1,GPRC5A,NOG,BCAR3,SEMA7A,IL11,SPHK1,HCLS1,SOCS1,ADRB2,BMP2,NEURL1,SH2D3A,CEACAM1,FAM20C,DSCAM
	positive regulation of phosphorylation	GO:0042327	3.31243e-05	4.47985	821	266	32	21092	ITGB3,CSF3,HES5,GREM1,BMP6,RAPGEF3,IL1B,FZD8,RELN,HBEGF,ADAM8,TGFA,THBS1,PTGS2,IFNK,INHBA,EPHA1,NCF1,NGF,EDN1,GPRC5A,BCAR3,SEMA7A,IL11,SPHK1,HCLS1,SOCS1,ADRB2,BMP2,NEURL1,SH2D3A,DSCAM
	lipid export from cell	GO:0140353	4.06329e-05	4.39112	48	206	8	21092	BMP6,IL1B,IL1A,GAL,PTGES,PTGS2,INHBA,EDN1
	embryonic morphogenesis	GO:0048598	4.50317e-05	4.34648	616	232	25	21092	ITGB3,HES5,GREM1,SNAI1,DUSP4,EDNRA,ID2,SLC44A4,HOXD13,DUSP5,DLL4,DUSP2,MESP1,MICAL2,DLX2,SOCS3,HOXB9,INHBA,EPHA1,DLC1,EDN1,FOXF2,OSR1,FOXC2,NOG
	cell surface receptor signaling pathway	GO:0007166	5.42421e-05	4.26566	2816	266	69	21092	ESM1,ITGB3,CSF3,CXCL1,CXCL8,HES5,GREM1,SNAI1,BMP6,TNFAIP3,IL1B,EDNRA,FZD8,IL1A,IFI27,CXCL3,DLL4,RELN,ID1,MESP1,HIC1,MX1,HBEGF,CDA,CXCL2,TGFA,FZD9,SPRY4,F3,THBS1,WNT10B,DLX2,IFI6,OAS1,JUN,SOCS3,XDH,IFNK,BCL2L1,INHBA,EPHA1,IRF9,NCF1,NGF,EDN1,GPRC5A,BCL2L2-PABPN1,FAM83A,FOXC2,IRAK2,FST,NOG,BCAR3,SEMA7A,DLL3,SPHK1,HCLS1,SOCS1,MAPK8IP2,APC2,ADRB2,BMP2,NEURL1,FOXD1,ECM1,PLXNA2,CEACAM1,FAM20C,DSCAM
	morphogenesis of a branching structure	GO:0001763	5.65075e-05	4.24789	201	257	15	21092	GREM1,EDNRA,HS3ST3A1,HOXD13,DLL4,PRDM1,DLX2,SOCS3,EPHA1,EDN1,COL13A1,FOXC2,NOG,BMP2,FOXD1
	cell death	GO:0008219	6.19225e-05	4.20815	2107	255	55	21092	ITGB3,CSF3,E9PSI1,GSDMA,SERPINB2,GREM1,S100A8,MMP3,SNAI1,TNFAIP3,FOSL1,IL1B,EDNRA,DHRS2,IL1A,IFI27,GAL,SNCB,ID1,HIC1,MX1,ALOX15B,ADAM8,TGFA,FZD9,THBS1,WNT10B,IFI6,PTGS2,JUN,SOCS3,PHLDA1,ARG2,BCL2L1,LCN2,INHBA,EPHA1,DLC1,NCF1,NGF,EDN1,NR4A1,BCL2L2-PABPN1,OSR1,AEN,LGALS7B,FOXC2,NOG,ETS1,S100A9,SPHK1,HCLS1,MAPK8IP2,BMP2,NEURL1
	tissue morphogenesis	GO:0048729	6.19773e-05	4.20777	631	264	27	21092	ITGB3,HES5,ID4,GREM1,SNAI1,EDNRA,HS3ST3A1,HOXD13,DLL4,MESP1,HBEGF,KRT6A,CARMIL2,MICAL2,SOCS3,INHBA,EPHA1,DLC1,EDN1,FOXF2,OSR1,FOXC2,FST,NOG,BMP2,FOXD1,CEACAM1
	apoptotic process	GO:0006915	7.64141e-05	4.11683	1889	255	51	21092	GSDMA,SERPINB2,GREM1,S100A8,SNAI1,TNFAIP3,FOSL1,IL1B,EDNRA,DHRS2,IL1A,IFI27,GAL,SNCB,ID1,HIC1,MX1,ALOX15B,ADAM8,TGFA,FZD9,THBS1,WNT10B,IFI6,PTGS2,JUN,SOCS3,PHLDA1,ARG2,BCL2L1,LCN2,INHBA,EPHA1,DLC1,NCF1,NGF,EDN1,NR4A1,BCL2L2-PABPN1,OSR1,AEN,LGALS7B,FOXC2,NOG,ETS1,S100A9,SPHK1,HCLS1,MAPK8IP2,BMP2,NEURL1
	response to bacterium	GO:0009617	7.6985e-05	4.11359	760	237	28	21092	PI3,CSF3,CXCL1,CXCL8,GSDMA,S100A8,BMP6,TNFAIP3,IL1B,SLPI,SPRR2A,IL1A,CXCL3,KLK7,RNASE7,CXCL2,KRT6A,OAS1,PTGS2,BDKRB1,ARG2,VGF,LCN2,EPHA1,EDN1,NR4A1,IRAK2,S100A9
	regulation of phosphate metabolic process	GO:0019220	8.84907e-05	4.0531	1391	266	43	21092	ITGB3,CSF3,HES5,GREM1,BMP6,TNFAIP3,RAPGEF3,IL1B,FZD8,RELN,HBEGF,CDA,ADAM8,SERPINB3,TGFA,SPRY4,THBS1,PTGS2,JUN,SOCS3,BDKRB1,XDH,IFNK,INHBA,EPHA1,DLC1,NCF1,NGF,EDN1,GPRC5A,NOG,BCAR3,SEMA7A,IL11,SPHK1,HCLS1,SOCS1,ADRB2,BMP2,NEURL1,SH2D3A,CEACAM1,DSCAM
	positive regulation of phosphate metabolic process	GO:0045937	9.02602e-05	4.0445	903	266	33	21092	ITGB3,CSF3,HES5,GREM1,BMP6,RAPGEF3,IL1B,FZD8,RELN,HBEGF,ADAM8,TGFA,THBS1,PTGS2,IFNK,INHBA,EPHA1,DLC1,NCF1,NGF,EDN1,GPRC5A,BCAR3,SEMA7A,IL11,SPHK1,HCLS1,SOCS1,ADRB2,BMP2,NEURL1,SH2D3A,DSCAM
	positive regulation of phosphorus metabolic process	GO:0010562	9.02602e-05	4.0445	903	266	33	21092	ITGB3,CSF3,HES5,GREM1,BMP6,RAPGEF3,IL1B,FZD8,RELN,HBEGF,ADAM8,TGFA,THBS1,PTGS2,IFNK,INHBA,EPHA1,DLC1,NCF1,NGF,EDN1,GPRC5A,BCAR3,SEMA7A,IL11,SPHK1,HCLS1,SOCS1,ADRB2,BMP2,NEURL1,SH2D3A,DSCAM
	negative regulation of cell communication	GO:0010648	9.13241e-05	4.03941	1352	264	42	21092	CXCL8,GREM1,SNAI1,TNFAIP3,IL1B,DUSP4,IL1A,DUSP5,DLL4,DUSP2,MESP1,HIC1,RGS16,SERPINB3,FZD9,SPRY4,THBS1,DLX2,IFI6,OAS1,PTGS2,SOCS3,XDH,RASA4B,BCL2L1,INHBA,EPHA1,DLC1,EDN1,GPRC5A,BCL2L2-PABPN1,FST,NOG,IL11,SOCS1,MAPK8IP2,APC2,ADRB2,BMP2,NEURL1,ECM1,CEACAM1
	negative regulation of signaling	GO:0023057	0.000101227	3.9947	1357	264	42	21092	CXCL8,GREM1,SNAI1,TNFAIP3,IL1B,DUSP4,IL1A,DUSP5,DLL4,DUSP2,MESP1,HIC1,RGS16,SERPINB3,FZD9,SPRY4,THBS1,DLX2,IFI6,OAS1,PTGS2,SOCS3,XDH,RASA4B,BCL2L1,INHBA,EPHA1,DLC1,EDN1,GPRC5A,BCL2L2-PABPN1,FST,NOG,IL11,SOCS1,MAPK8IP2,APC2,ADRB2,BMP2,NEURL1,ECM1,CEACAM1
	positive regulation of signaling receptor activity	GO:2000273	0.000149493	3.82538	46	255	8	21092	GREM1,RELN,HBEGF,TGFA,NCF1,EDN1,ADRB2,NEURL1
	transmembrane receptor protein tyrosine kinase signaling pathway	GO:0007169	0.000176526	3.75319	619	265	26	21092	ESM1,ITGB3,GREM1,IL1B,HBEGF,TGFA,SPRY4,F3,THBS1,IFI6,SOCS3,XDH,EPHA1,NCF1,NGF,GPRC5A,FAM83A,FOXC2,NOG,BCAR3,SOCS1,ADRB2,BMP2,NEURL1,CEACAM1,FAM20C
	embryo development	GO:0009790	0.000177062	3.75187	1135	263	37	21092	ITGB3,CXCL8,HES5,GREM1,SNAI1,FOSL1,DUSP4,EDNRA,ID2,SLC44A4,HOXD13,DUSP5,DLL4,MAFF,DUSP2,MESP1,PRDM1,MICAL2,DLX2,SOCS3,GJB3,BCL2L1,HOXB9,INHBA,ARNT2,EPHA1,DLC1,EDN1,COL13A1,FOXF2,OSR1,FOXC2,NOG,DLL3,PLD6,BMP2,PLXNA2
	programmed cell death	GO:0012501	0.000184571	3.73384	1942	255	51	21092	GSDMA,SERPINB2,GREM1,S100A8,SNAI1,TNFAIP3,FOSL1,IL1B,EDNRA,DHRS2,IL1A,IFI27,GAL,SNCB,ID1,HIC1,MX1,ALOX15B,ADAM8,TGFA,FZD9,THBS1,WNT10B,IFI6,PTGS2,JUN,SOCS3,PHLDA1,ARG2,BCL2L1,LCN2,INHBA,EPHA1,DLC1,NCF1,NGF,EDN1,NR4A1,BCL2L2-PABPN1,OSR1,AEN,LGALS7B,FOXC2,NOG,ETS1,S100A9,SPHK1,HCLS1,MAPK8IP2,BMP2,NEURL1
	negative regulation of signal transduction	GO:0009968	0.000229326	3.63955	1243	264	39	21092	CXCL8,GREM1,SNAI1,TNFAIP3,IL1B,DUSP4,IL1A,DUSP5,DLL4,DUSP2,MESP1,HIC1,RGS16,SERPINB3,FZD9,SPRY4,THBS1,DLX2,IFI6,OAS1,PTGS2,SOCS3,XDH,RASA4B,BCL2L1,EPHA1,DLC1,GPRC5A,BCL2L2-PABPN1,FST,NOG,SOCS1,MAPK8IP2,APC2,ADRB2,BMP2,NEURL1,ECM1,CEACAM1
	negative regulation of developmental process	GO:0051093	0.000250438	3.6013	929	270	33	21092	ITGB3,HES5,ID4,GREM1,SNAI1,PTHLH,RAPGEF3,IL1B,ID2,IL1A,ID1,MESP1,SPRY4,THBS1,WNT10B,DLX2,XDH,BCL2L1,INHBA,EPHA1,OSR1,FOXC2,H4C6,FST,NOG,SEMA7A,DLL3,SOCS1,ADRB2,BMP2,ECM1,CEACAM1,CCDC85B
	humoral immune response	GO:0006959	0.000311795	3.50613	318	136	13	21092	KRT1,PI3,CXCL1,CXCL8,IL1B,PRSS3,SLPI,SPRR2A,CXCL3,KLK7,RNASE7,CXCL2,KRT6A
	regulation of cell development	GO:0060284	0.000335469	3.47435	512	266	23	21092	ITGB3,HES5,ID4,PTHLH,IL1B,ID2,IL1A,DLL4,RELN,ID1,SPRY4,PREX1,DLX2,ZNF365,UNC13D,NGF,NOG,SEMA7A,DLL3,BMP2,NEURL1,PLXNA2,DSCAM
	regulation of vasculature development	GO:1901342	0.000375044	3.42592	292	264	17	21092	KRT1,ITGB3,CXCL8,GREM1,TNFAIP3,RAPGEF3,IL1B,IL1A,ID1,F3,THBS1,EPHA1,FOXC2,ETS1,SPHK1,ECM1,CEACAM1
	response to lipopolysaccharide	GO:0032496	0.000401357	3.39647	327	237	17	21092	CSF3,CXCL1,CXCL8,S100A8,BMP6,TNFAIP3,IL1B,SLPI,IL1A,CXCL3,CXCL2,PTGS2,BDKRB1,EDN1,NR4A1,IRAK2,S100A9
	regulation of cell migration	GO:0030334	0.000406366	3.39108	923	264	32	21092	ITGB3,CXCL8,GREM1,NAV3,SNAI1,IL1B,IL1A,DLL4,RELN,HBEGF,ALOX15B,ADAM8,SERPINB3,CARMIL2,F3,THBS1,PTGS2,JUN,BDKRB1,ROBO4,EPHA1,DLC1,EDN1,FOXC2,NOG,SEMA7A,ETS1,SPHK1,BMP2,ECM1,PLXNA2,CEACAM1
	enzyme-linked receptor protein signaling pathway	GO:0007167	0.000498945	3.30195	976	265	33	21092	ESM1,ITGB3,HES5,GREM1,BMP6,IL1B,ID1,HBEGF,TGFA,SPRY4,F3,THBS1,IFI6,JUN,SOCS3,XDH,INHBA,EPHA1,NCF1,NGF,GPRC5A,FAM83A,FOXC2,FST,NOG,BCAR3,SOCS1,ADRB2,BMP2,NEURL1,FOXD1,CEACAM1,FAM20C
	negative regulation of cell death	GO:0060548	0.000536597	3.27035	1001	247	32	21092	ITGB3,CSF3,E9PSI1,SERPINB2,GREM1,SNAI1,TNFAIP3,IL1B,DHRS2,IL1A,SNCB,ID1,ADAM8,TGFA,FZD9,THBS1,IFI6,PTGS2,JUN,SOCS3,ARG2,BCL2L1,NGF,EDN1,NR4A1,BCL2L2-PABPN1,OSR1,FOXC2,NOG,SPHK1,HCLS1,MAPK8IP2
	negative regulation of response to stimulus	GO:0048585	0.000538166	3.26908	1604	264	45	21092	KRT1,CXCL8,SERPINB2,GREM1,SNAI1,TNFAIP3,IL1B,DUSP4,IL1A,DUSP5,DLL4,DUSP2,MESP1,HIC1,RGS16,SERPINB3,FZD9,SPRY4,THBS1,DLX2,IFI6,OAS1,PTGS2,SOCS3,XDH,RASA4B,ARG2,BCL2L1,EPHA1,DLC1,EDN1,GPRC5A,BCL2L2-PABPN1,METRNL,FST,NOG,SEMA7A,SOCS1,MAPK8IP2,APC2,ADRB2,BMP2,NEURL1,ECM1,CEACAM1
	regulation of epithelial cell proliferation	GO:0050678	0.000539483	3.26802	372	264	19	21092	ITGB3,HES5,BMP6,TNFAIP3,DLL4,ID1,TGM1,TGFA,F3,THBS1,WNT10B,JUN,XDH,NR4A1,OSR1,NOG,BMP2,ECM1,CEACAM1
	regulation of intracellular signal transduction	GO:1902531	0.000540532	3.26718	1714	264	47	21092	ITGB3,CSF3,GREM1,S100A8,SNAI1,PIK3AP1,TNFAIP3,IL1B,DUSP4,FZD8,IL1A,DUSP5,RELN,DUSP2,HIC1,HBEGF,ADRA1D,ADAM8,SERPINB3,TGFA,SPRY4,F3,PREX1,THBS1,PTGS2,JUN,XDH,RASA4B,BCL2L1,EPHA1,DLC1,GPR3,NCF1,NGF,EDN1,BCL2L2-PABPN1,BCAR3,SEMA7A,S100A9,IL11,SPHK1,HCLS1,MAPK8IP2,ADRB2,BMP2,ECM1,CEACAM1
	granulocyte migration	GO:0097530	0.000568509	3.24526	160	237	12	21092	CXCL1,CXCL8,S100A8,IL1B,IL1A,CXCL3,CXCL2,ADAM8,PREX1,THBS1,EDN1,S100A9
	negative regulation of multicellular organismal process	GO:0051241	0.000575147	3.24022	1035	264	34	21092	KRT1,HES5,ID4,SERPINB2,GREM1,NAV3,PTHLH,TNFAIP3,IL1B,ID2,DLL4,ID1,MESP1,THBS1,WNT10B,DLX2,OAS1,PTGS2,ARG2,INHBA,EPHA1,EDN1,OSR1,LGALS7B,FOXC2,NOG,RELB,SEMA7A,DLL3,SOCS1,ADRB2,BMP2,ECM1,CEACAM1
	epithelial cell migration	GO:0010631	0.000576684	3.23906	301	264	17	21092	ITGB3,GREM1,S100P,SNAI1,PRSS3,DLL4,ID1,HBEGF,THBS1,PTGS2,JUN,EPHA1,EDN1,NR4A1,FOXC2,ETS1,CEACAM1
	neutrophil migration	GO:1990266	0.00057833	3.23782	131	237	11	21092	CXCL1,CXCL8,S100A8,IL1B,IL1A,CXCL3,CXCL2,ADAM8,PREX1,EDN1,S100A9
	cellular response to oxygen-containing compound	GO:1901701	0.000582365	3.2348	1186	264	37	21092	ITGB3,CSF3,CXCL1,CXCL8,MMP3,BMP6,TNFAIP3,RAPGEF3,IL1B,EDNRA,IL1A,CXCL3,ID1,GRAMD1B,CXCL2,WNT10B,PTGS2,JUN,SOCS3,GJB3,BCL2L1,INHBA,NCF1,EDN1,NR4A1,OSR1,HTR1D,FOXC2,IRAK2,TWNK,BCAR3,SPHK1,SOCS1,CYP24A1,ADRB2,NEURL1,CEACAM1
	regulation of locomotion	GO:0040012	0.000615653	3.21066	1030	266	34	21092	ITGB3,CXCL8,GREM1,NAV3,SNAI1,IL1B,IL1A,DLL4,RELN,HBEGF,ALOX15B,ADAM8,SERPINB3,CARMIL2,F3,THBS1,PTGS2,JUN,BDKRB1,ROBO4,EPHA1,DLC1,EDN1,HTR1D,FOXC2,NOG,SEMA7A,ETS1,SPHK1,BMP2,ECM1,PLXNA2,CEACAM1,DSCAM
	epithelium migration	GO:0090132	0.000663212	3.17835	304	264	17	21092	ITGB3,GREM1,S100P,SNAI1,PRSS3,DLL4,ID1,HBEGF,THBS1,PTGS2,JUN,EPHA1,EDN1,NR4A1,FOXC2,ETS1,CEACAM1
	connective tissue development	GO:0061448	0.00071516	3.1456	274	261	16	21092	ITGB3,HES5,ID4,GREM1,SNAI1,PTHLH,BMP6,WNT10B,DLX2,EDN1,OSR1,FOXC2,NOG,BMP2,FOXD1,ECM1
	regulation of MAPK cascade	GO:0043408	0.000715764	3.14523	668	264	26	21092	ITGB3,IL1B,DUSP4,FZD8,IL1A,DUSP5,DUSP2,ADRA1D,ADAM8,SERPINB3,TGFA,SPRY4,THBS1,JUN,XDH,EPHA1,NCF1,EDN1,BCAR3,SEMA7A,IL11,SPHK1,MAPK8IP2,ADRB2,BMP2,CEACAM1
	ameboidal-type cell migration	GO:0001667	0.000813232	3.08979	428	236	19	21092	ITGB3,GREM1,S100P,SNAI1,EDNRA,PRSS3,DLL4,ID1,MESP1,HBEGF,THBS1,PTGS2,JUN,EPHA1,EDN1,NR4A1,FOXC2,SEMA7A,ETS1
	bone mineralization	GO:0030282	0.000854801	3.06814	122	265	11	21092	GREM1,PTHLH,BMP6,FZD9,WNT10B,PTGS2,OSR1,ADRB2,BMP2,ECM1,FAM20C
	positive regulation of cell migration	GO:0030335	0.000861083	3.06496	527	252	22	21092	ITGB3,CXCL8,SNAI1,IL1B,IL1A,RELN,HBEGF,ADAM8,SERPINB3,CARMIL2,F3,THBS1,PTGS2,JUN,BDKRB1,EPHA1,EDN1,FOXC2,SEMA7A,ETS1,SPHK1,BMP2
	tissue migration	GO:0090130	0.000872611	3.05918	310	264	17	21092	ITGB3,GREM1,S100P,SNAI1,PRSS3,DLL4,ID1,HBEGF,THBS1,PTGS2,JUN,EPHA1,EDN1,NR4A1,FOXC2,ETS1,CEACAM1
	response to molecule of bacterial origin	GO:0002237	0.000888803	3.05119	346	237	17	21092	CSF3,CXCL1,CXCL8,S100A8,BMP6,TNFAIP3,IL1B,SLPI,IL1A,CXCL3,CXCL2,PTGS2,BDKRB1,EDN1,NR4A1,IRAK2,S100A9
	regulation of cell death	GO:0010941	0.00089755	3.04694	1637	255	44	21092	ITGB3,CSF3,E9PSI1,SERPINB2,GREM1,S100A8,MMP3,SNAI1,TNFAIP3,FOSL1,IL1B,DHRS2,IL1A,GAL,SNCB,ID1,ADAM8,TGFA,FZD9,THBS1,WNT10B,IFI6,PTGS2,JUN,SOCS3,PHLDA1,ARG2,BCL2L1,INHBA,DLC1,NGF,EDN1,NR4A1,BCL2L2-PABPN1,OSR1,FOXC2,NOG,ETS1,S100A9,SPHK1,HCLS1,MAPK8IP2,BMP2,NEURL1
	ossification	GO:0001503	0.000994173	3.00254	415	271	20	21092	ID4,GREM1,SNAI1,PTHLH,BMP6,FZD9,WNT10B,PTGS2,EPHA1,COL13A1,OSR1,FOXC2,NOG,SEMA7A,CYP24A1,ADRB2,BMP2,ECM1,FAM20C,SMOC1
	negative regulation of apoptotic process	GO:0043066	0.00113818	2.94379	881	247	29	21092	SERPINB2,GREM1,SNAI1,TNFAIP3,IL1B,DHRS2,IL1A,SNCB,ID1,ADAM8,TGFA,FZD9,THBS1,IFI6,PTGS2,JUN,SOCS3,ARG2,BCL2L1,NGF,EDN1,NR4A1,BCL2L2-PABPN1,OSR1,FOXC2,NOG,SPHK1,HCLS1,MAPK8IP2
	cell chemotaxis	GO:0060326	0.00121126	2.91676	314	237	16	21092	CXCL1,CXCL8,GREM1,S100A8,IL1B,CXCL3,HBEGF,CXCL2,ADAM8,PREX1,THBS1,HOXB9,EPHA1,EDN1,NR4A1,S100A9
	regulation of peptidyl-tyrosine phosphorylation	GO:0050730	0.00125583	2.90107	257	255	15	21092	ITGB3,CSF3,HES5,GREM1,BMP6,RELN,HBEGF,TGFA,SOCS3,NCF1,GPRC5A,IL11,HCLS1,SOCS1,NEURL1
	positive regulation of response to stimulus	GO:0048584	0.00137034	2.86317	2214	266	55	21092	ESM1,KRT1,ITGB3,CSF3,CXCL8,HES5,GREM1,S100A8,KLK6,PIK3AP1,BMP6,TNFAIP3,IL1B,FZD8,IL1A,DLL4,RELN,KLK7,MESP1,HIC1,HBEGF,ALOX15B,ADRA1D,ADAM8,TGFA,FZD9,F3,THBS1,WNT10B,PTGS2,JUN,XDH,IFNK,INHBA,GPR3,NCF1,NGF,EDN1,FOXC2,BCAR3,SEMA7A,ETS1,S100A9,IL11,SPHK1,HCLS1,SOCS1,MAPK8IP2,ADRB2,BMP2,NEURL1,FOXD1,ECM1,CEACAM1,DSCAM
	pattern specification process	GO:0007389	0.00140772	2.85148	478	263	21	21092	HES5,GREM1,SNAI1,HOXD13,DLL4,RELN,MESP1,MICAL2,DLX2,HOXB9,EDN1,OSR1,FOXC2,FST,NOG,DLL3,PLD6,APC2,BMP2,FOXD1,PLXNA2
	endothelial cell migration	GO:0043542	0.00144811	2.8392	218	264	14	21092	ITGB3,GREM1,S100P,PRSS3,DLL4,ID1,THBS1,PTGS2,EPHA1,EDN1,NR4A1,FOXC2,ETS1,CEACAM1
	positive regulation of protein modification process	GO:0031401	0.00146967	2.83278	1010	256	32	21092	ITGB3,CSF3,HES5,GREM1,BMP6,RAPGEF3,IL1B,FZD8,RELN,HBEGF,ADAM8,TGFA,THBS1,PTGS2,IFNK,INHBA,DLC1,PRDM12,NCF1,NGF,EDN1,GPRC5A,BCAR3,SEMA7A,IL11,SPHK1,HCLS1,SOCS1,ADRB2,BMP2,NEURL1,SH2D3A
	regulation of bone mineralization	GO:0030500	0.00151135	2.82064	80	265	9	21092	GREM1,BMP6,FZD9,WNT10B,OSR1,ADRB2,BMP2,ECM1,FAM20C
	regulation of angiogenesis	GO:0045765	0.00161914	2.79072	288	264	16	21092	KRT1,ITGB3,CXCL8,GREM1,TNFAIP3,RAPGEF3,IL1B,IL1A,F3,THBS1,EPHA1,FOXC2,ETS1,SPHK1,ECM1,CEACAM1
	negative regulation of cell differentiation	GO:0045596	0.00163361	2.78685	682	270	26	21092	ITGB3,HES5,ID4,GREM1,SNAI1,PTHLH,IL1B,ID2,IL1A,ID1,MESP1,SPRY4,WNT10B,DLX2,XDH,INHBA,OSR1,H4C6,FST,NOG,SEMA7A,DLL3,SOCS1,BMP2,CEACAM1,CCDC85B
	positive regulation of intracellular signal transduction	GO:1902533	0.00163657	2.78607	995	261	32	21092	ITGB3,CSF3,GREM1,S100A8,PIK3AP1,IL1B,FZD8,IL1A,RELN,HIC1,HBEGF,ADRA1D,ADAM8,TGFA,F3,THBS1,JUN,XDH,GPR3,NCF1,NGF,EDN1,BCAR3,SEMA7A,S100A9,IL11,SPHK1,HCLS1,MAPK8IP2,ADRB2,BMP2,ECM1
	endothelium development	GO:0003158	0.00168578	2.7732	131	264	11	21092	BMP6,RAPGEF3,IL1B,EDNRA,DLL4,ID1,MESP1,XDH,ROBO4,FOXC2,CEACAM1
	regulation of cell motility	GO:2000145	0.00169651	2.77044	985	264	32	21092	ITGB3,CXCL8,GREM1,NAV3,SNAI1,IL1B,IL1A,DLL4,RELN,HBEGF,ALOX15B,ADAM8,SERPINB3,CARMIL2,F3,THBS1,PTGS2,JUN,BDKRB1,ROBO4,EPHA1,DLC1,EDN1,FOXC2,NOG,SEMA7A,ETS1,SPHK1,BMP2,ECM1,PLXNA2,CEACAM1
	regionalization	GO:0003002	0.00169656	2.77043	364	263	18	21092	HES5,GREM1,SNAI1,HOXD13,DLL4,RELN,MESP1,DLX2,HOXB9,EDN1,OSR1,FOXC2,NOG,DLL3,PLD6,BMP2,FOXD1,PLXNA2
	negative regulation of programmed cell death	GO:0043069	0.00175424	2.75591	900	247	29	21092	SERPINB2,GREM1,SNAI1,TNFAIP3,IL1B,DHRS2,IL1A,SNCB,ID1,ADAM8,TGFA,FZD9,THBS1,IFI6,PTGS2,JUN,SOCS3,ARG2,BCL2L1,NGF,EDN1,NR4A1,BCL2L2-PABPN1,OSR1,FOXC2,NOG,SPHK1,HCLS1,MAPK8IP2
	regulation of apoptotic process	GO:0042981	0.00179864	2.74506	1453	255	40	21092	SERPINB2,GREM1,S100A8,SNAI1,TNFAIP3,FOSL1,IL1B,DHRS2,IL1A,GAL,SNCB,ID1,ADAM8,TGFA,FZD9,THBS1,WNT10B,IFI6,PTGS2,JUN,SOCS3,PHLDA1,ARG2,BCL2L1,INHBA,DLC1,NGF,EDN1,NR4A1,BCL2L2-PABPN1,OSR1,FOXC2,NOG,ETS1,S100A9,SPHK1,HCLS1,MAPK8IP2,BMP2,NEURL1
	prostaglandin secretion	GO:0032310	0.00183464	2.73645	19	206	5	21092	IL1B,IL1A,PTGES,PTGS2,EDN1
	positive regulation of cell motility	GO:2000147	0.00198438	2.70237	554	252	22	21092	ITGB3,CXCL8,SNAI1,IL1B,IL1A,RELN,HBEGF,ADAM8,SERPINB3,CARMIL2,F3,THBS1,PTGS2,JUN,BDKRB1,EPHA1,EDN1,FOXC2,SEMA7A,ETS1,SPHK1,BMP2
	protein phosphorylation	GO:0006468	0.00207971	2.682	1567	265	43	21092	ITGB3,CSF3,HES5,GREM1,BMP6,TNFAIP3,RAPGEF3,IL1B,EDNRA,FZD8,RELN,HBEGF,ADAM8,SERPINB3,TGFA,SPRY4,THBS1,PTGS2,JUN,SOCS3,BDKRB1,XDH,IFNK,INHBA,EPHA1,NCF1,NGF,EDN1,GPRC5A,IRAK2,NOG,BCAR3,SEMA7A,IL11,SPHK1,HCLS1,SOCS1,ADRB2,BMP2,NEURL1,SH2D3A,CEACAM1,FAM20C
	positive regulation of locomotion	GO:0040017	0.00217329	2.66288	570	266	23	21092	ITGB3,CXCL8,SNAI1,IL1B,IL1A,RELN,HBEGF,ADAM8,SERPINB3,CARMIL2,F3,THBS1,PTGS2,JUN,BDKRB1,EPHA1,EDN1,FOXC2,SEMA7A,ETS1,SPHK1,BMP2,DSCAM
	antimicrobial humoral immune response mediated by antimicrobial peptide	GO:0061844	0.00228228	2.64163	83	136	7	21092	CXCL1,CXCL8,CXCL3,KLK7,RNASE7,CXCL2,KRT6A
	negative regulation of nitrogen compound metabolic process	GO:0051172	0.00232428	2.63371	2392	270	58	21092	ITGB3,PI3,FAM220A,A2ML1,HES5,ID4,SERPINB2,GREM1,SNAI1,BMP6,TNFAIP3,IL1B,ID2,SLPI,IFI27,DLL4,MAFF,ID1,ZBED2,MESP1,HIC1,PRDM1,HBEGF,SAMD11,CDA,SERPINB3,SPRY4,THBS1,WNT10B,DLX2,IFI6,PTGS2,JUN,SOCS3,BDKRB1,XDH,PRDM12,SERPINB8,NGF,EDN1,GPRC5A,NR4A1,FOXF2,OSR1,ZNF239,FOXC2,FST,NOG,RELB,SPHK1,HCLS1,SOCS1,BMP2,FOXD1,FOSB,ECM1,CEACAM1,CCDC85B
	positive regulation of angiogenesis	GO:0045766	0.00235158	2.62864	166	261	12	21092	ITGB3,CXCL8,GREM1,RAPGEF3,IL1B,IL1A,F3,THBS1,FOXC2,ETS1,SPHK1,ECM1
	positive regulation of vasculature development	GO:1904018	0.00235158	2.62864	166	261	12	21092	ITGB3,CXCL8,GREM1,RAPGEF3,IL1B,IL1A,F3,THBS1,FOXC2,ETS1,SPHK1,ECM1
	positive regulation of bone mineralization	GO:0030501	0.00245057	2.61073	44	265	7	21092	BMP6,FZD9,WNT10B,OSR1,ADRB2,BMP2,FAM20C
	fever generation	GO:0001660	0.00249593	2.60277	11	167	4	21092	IL1B,IL1A,PTGES,PTGS2
	formation of primary germ layer	GO:0001704	0.0026157	2.58241	125	232	10	21092	ITGB3,SNAI1,DUSP4,DUSP5,DUSP2,MESP1,INHBA,EPHA1,FOXC2,NOG
	heat generation	GO:0031649	0.00263053	2.57996	17	251	5	21092	IL1B,IL1A,PTGES,PTGS2,ADRB2
	regulation of programmed cell death	GO:0043067	0.0029498	2.53021	1482	255	40	21092	SERPINB2,GREM1,S100A8,SNAI1,TNFAIP3,FOSL1,IL1B,DHRS2,IL1A,GAL,SNCB,ID1,ADAM8,TGFA,FZD9,THBS1,WNT10B,IFI6,PTGS2,JUN,SOCS3,PHLDA1,ARG2,BCL2L1,INHBA,DLC1,NGF,EDN1,NR4A1,BCL2L2-PABPN1,OSR1,FOXC2,NOG,ETS1,S100A9,SPHK1,HCLS1,MAPK8IP2,BMP2,NEURL1
	MAPK cascade	GO:0000165	0.00309158	2.50982	769	264	27	21092	ITGB3,IL1B,DUSP4,FZD8,IL1A,DUSP5,DUSP2,ADRA1D,ADAM8,SERPINB3,TGFA,SPRY4,THBS1,JUN,XDH,EPHA1,NCF1,EDN1,BCAR3,SEMA7A,IL11,SPHK1,MAPK8IP2,ADRB2,BMP2,SH2D3A,CEACAM1
	prostaglandin transport	GO:0015732	0.00315996	2.50032	21	206	5	21092	IL1B,IL1A,PTGES,PTGS2,EDN1
	regulation of catalytic activity	GO:0050790	0.00324402	2.48892	2354	264	56	21092	ITGB3,PI3,CXCL1,A2ML1,SERPINB2,GREM1,S100A8,CDC42EP2,TNFAIP3,RAPGEF3,IL1B,EDNRA,FZD8,NCF2,SLPI,IL1A,SNCB,RELN,PPP2R2C,RGS16,HBEGF,ADAM8,SERPINB3,TGFA,SPRY4,F3,PREX1,THBS1,IFI6,OAS1,PTGS2,RAB3IL1,JUN,SOCS3,XDH,RASA4B,EPHA1,DLC1,SERPINB8,NCF1,NGF,EDN1,GPRC5A,NR4A1,BCAR3,S100A9,SOCS1,APC2,TBC1D30,ADRB2,BMP2,NEURL1,SH2D3A,ECM1,PLXNA2,CEACAM1
	cellular response to organic substance	GO:0071310	0.00325792	2.48706	2405	265	57	21092	ITGB3,CSF3,CXCL1,CXCL8,HES5,GREM1,CDC42EP2,BMP6,TNFAIP3,RAPGEF3,IL1B,EDNRA,IL1A,IFI27,CXCL3,DLL4,ID1,GRAMD1B,MX1,CXCL2,SPRY4,F3,THBS1,WNT10B,OAS1,PTGS2,JUN,SOCS3,XDH,GJB3,IFNK,BCL2L1,INHBA,EHD1,NGF,EDN1,NR4A1,OSR1,HTR1D,FOXC2,IRAK2,TWNK,FST,NOG,BCAR3,SPHK1,HCLS1,SOCS1,CYP24A1,ADRB2,BMP2,NEURL1,FOXD1,FOSB,ECM1,CEACAM1,FAM20C
	regulation of protein modification process	GO:0031399	0.0032624	2.48646	1545	264	42	21092	ITGB3,CSF3,HES5,GREM1,BMP6,TNFAIP3,RAPGEF3,IL1B,FZD8,RELN,HBEGF,ADAM8,SERPINB3,TGFA,SPRY4,THBS1,PTGS2,JUN,SOCS3,BDKRB1,XDH,IFNK,INHBA,DLC1,PRDM12,NCF1,NGF,EDN1,GPRC5A,FOXF2,NOG,BCAR3,SEMA7A,IL11,SPHK1,HCLS1,SOCS1,ADRB2,BMP2,NEURL1,SH2D3A,CEACAM1
	myeloid leukocyte migration	GO:0097529	0.00351784	2.45372	240	155	11	21092	CXCL1,CXCL8,GREM1,S100A8,IL1B,IL1A,CXCL3,CXCL2,ADAM8,PREX1,THBS1
	chronic inflammatory response	GO:0002544	0.00365815	2.43674	19	237	5	21092	S100A8,TNFAIP3,THBS1,UNC13D,S100A9
	cytoskeleton organization	GO:0007010	0.00375502	2.42539	1491	65	17	21092	KRT81,KRT1,ITGB3,INSC,CSF3,MYO7B,CXCL1,E9PSI1,FRMD3,KRT6B,KRT6C,S100A8,MYH14,NAV3,CDC42EP2,TNFAIP3,RAPGEF3
	positive regulation of smooth muscle cell proliferation	GO:0048661	0.0038048	2.41967	85	206	8	21092	ITGB3,HES5,ID2,HBEGF,THBS1,PTGS2,JUN,EDN1
	skeletal system development	GO:0001501	0.00410653	2.38653	544	268	22	21092	HES5,GREM1,SNAI1,PTHLH,BMP6,EDNRA,HOXD13,WNT10B,DLX2,HOXB9,EPHA1,EDN1,COL13A1,OSR1,FOXC2,FST,NOG,DLL3,BMP2,ECM1,FAM20C,TTC9
	regulation of response to stress	GO:0080134	0.00452757	2.34413	1356	252	37	21092	KRT1,RTEL1-TNFRSF6B,SERPINB2,S100A8,MMP3,SNAI1,PIK3AP1,TNFAIP3,IL1B,IL1A,PTGES,KLK7,HIC1,HBEGF,ADAM8,SERPINB3,F3,THBS1,OAS1,ZNF365,PTGS2,SOCS3,XDH,IFNK,ARG2,BCL2L1,NCF1,EDN1,METRNL,FOXC2,SEMA7A,ETS1,S100A9,SPHK1,SOCS1,MAPK8IP2,BMP2
	positive regulation of protein metabolic process	GO:0051247	0.00469403	2.32845	1504	256	40	21092	ITGB3,CSF3,HES5,GREM1,S100A8,BMP6,TNFAIP3,RAPGEF3,IL1B,FZD8,RELN,HBEGF,ADAM8,SERPINB3,TGFA,F3,THBS1,PTGS2,XDH,IFNK,INHBA,DLC1,PRDM12,NCF1,NGF,EDN1,GPRC5A,BCAR3,SEMA7A,S100A9,IL11,SPHK1,HCLS1,SOCS1,APC2,ADRB2,BMP2,TFR2,NEURL1,SH2D3A
	intracellular signal transduction	GO:0035556	0.00472968	2.32517	2627	264	60	21092	ITGB3,CSF3,CXCL1,CXCL8,GREM1,S100A8,CDC42EP2,SNAI1,PIK3AP1,TNFAIP3,RAPGEF3,IL1B,DUSP4,EDNRA,FZD8,IL1A,DUSP5,GAL,RELN,DUSP2,HIC1,HBEGF,ADRA1D,ADAM8,SERPINB3,TGFA,SPRY4,F3,PREX1,THBS1,IFI6,PTGS2,JUN,SOCS3,XDH,RASA4B,BCL2L1,EPHA1,DLC1,GPR3,NCF1,NGF,EDN1,BCL2L2-PABPN1,AEN,IRAK2,RELB,BCAR3,SEMA7A,S100A9,IL11,SPHK1,HCLS1,SOCS1,MAPK8IP2,ADRB2,BMP2,SH2D3A,ECM1,CEACAM1
	positive regulation of epithelial cell proliferation	GO:0050679	0.00482026	2.31693	210	261	13	21092	ITGB3,BMP6,TNFAIP3,ID1,TGM1,TGFA,F3,JUN,NR4A1,OSR1,NOG,BMP2,ECM1
	granulocyte chemotaxis	GO:0071621	0.00486282	2.31311	131	237	10	21092	CXCL1,CXCL8,S100A8,IL1B,CXCL3,CXCL2,PREX1,THBS1,EDN1,S100A9
	regulation of epidermal growth factor receptor signaling pathway	GO:0042058	0.00487961	2.31161	69	264	8	21092	HBEGF,TGFA,IFI6,NCF1,GPRC5A,BCAR3,NEURL1,CEACAM1
	urogenital system development	GO:0001655	0.00526043	2.27898	363	257	17	21092	ITGB3,HES5,ID4,GREM1,BMP6,EDNRA,HS3ST3A1,HOXD13,PRDM1,ALOX15B,ODC1,ARG2,OSR1,FOXC2,NOG,BMP2,FOXD1
	positive regulation of transcription by RNA polymerase II	GO:0045944	0.00634623	2.19748	1243	267	36	21092	CSF3,HES5,ID4,GREM1,BMP6,FOSL1,IL1B,HOXD13,DDN,IL1A,GAL,MAFF,MESP1,WNT10B,DLX2,JUN,HOXB9,INHBA,ARNT2,IRF9,EDN1,NR4A1,FOXF2,OSR1,FOXC2,NOG,RELB,ETS1,IL11,HCLS1,ADRB2,BMP2,TFR2,FOXD1,FOSB,FOXD2
	neutrophil chemotaxis	GO:0030593	0.00651613	2.18601	106	237	9	21092	CXCL1,CXCL8,S100A8,IL1B,CXCL3,CXCL2,PREX1,EDN1,S100A9
	cellular response to biotic stimulus	GO:0071216	0.00678313	2.16857	246	131	10	21092	CSF3,CXCL1,CXCL8,BMP6,TNFAIP3,IL1B,IL1A,CXCL3,CDA,CXCL2
	morphogenesis of a branching epithelium	GO:0061138	0.00698303	2.15596	187	257	12	21092	GREM1,EDNRA,HS3ST3A1,HOXD13,DLL4,SOCS3,EPHA1,EDN1,FOXC2,NOG,BMP2,FOXD1
	embryonic organ development	GO:0048568	0.00728182	2.13776	458	232	18	21092	CXCL8,SNAI1,EDNRA,ID2,SLC44A4,MESP1,PRDM1,MICAL2,DLX2,SOCS3,HOXB9,EPHA1,EDN1,COL13A1,FOXF2,OSR1,FOXC2,NOG
	regulation of response to external stimulus	GO:0032101	0.00761318	2.11843	948	266	30	21092	KRT1,CXCL8,SERPINB2,GREM1,S100A8,MMP3,PIK3AP1,BMP6,TNFAIP3,IL1B,PTGES,KLK7,ADAM8,F3,THBS1,OAS1,PTGS2,SOCS3,IFNK,ARG2,NCF1,EDN1,METRNL,SEMA7A,ETS1,S100A9,SPHK1,SOCS1,CEACAM1,DSCAM
	positive regulation of peptidyl-tyrosine phosphorylation	GO:0050731	0.00802148	2.09575	191	255	12	21092	ITGB3,CSF3,HES5,GREM1,BMP6,RELN,HBEGF,TGFA,NCF1,IL11,HCLS1,NEURL1
	cellular response to lipopolysaccharide	GO:0071222	0.00868297	2.06133	210	93	8	21092	CSF3,CXCL1,CXCL8,BMP6,TNFAIP3,IL1B,IL1A,CXCL3
	regulation of inflammatory response	GO:0050727	0.00891509	2.04987	360	241	16	21092	KRT1,S100A8,MMP3,PIK3AP1,TNFAIP3,IL1B,PTGES,ADAM8,PTGS2,SOCS3,NCF1,METRNL,SEMA7A,ETS1,S100A9,SPHK1
	endothelial cell proliferation	GO:0001935	0.00895162	2.0481	157	261	11	21092	ITGB3,BMP6,DLL4,F3,THBS1,JUN,XDH,EPHA1,NR4A1,BMP2,ECM1
	positive regulation of DNA-binding transcription factor activity	GO:0051091	0.00912636	2.0397	267	252	14	21092	CSF3,GREM1,S100A8,FOSL1,IL1B,RELN,ADAM8,WNT10B,EDN1,IRAK2,S100A9,SPHK1,HCLS1,BMP2
	regulation of signaling receptor activity	GO:0010469	0.00913855	2.03912	161	255	11	21092	GREM1,RELN,HBEGF,TGFA,NCF1,EDN1,GPRC5A,NOG,MAPK8IP2,ADRB2,NEURL1
	regulation of ERBB signaling pathway	GO:1901184	0.00922899	2.03485	75	264	8	21092	HBEGF,TGFA,IFI6,NCF1,GPRC5A,BCAR3,NEURL1,CEACAM1
	mesenchyme development	GO:0060485	0.00981331	2.00818	301	257	15	21092	GREM1,SNAI1,IL1B,EDNRA,MESP1,SERPINB3,EDN1,FOXF2,OSR1,FOXC2,NOG,SEMA7A,DLL3,BMP2,FOXD1
	positive regulation of biomineral tissue development	GO:0070169	0.0101759	1.99243	54	265	7	21092	BMP6,FZD9,WNT10B,OSR1,ADRB2,BMP2,FAM20C
	positive regulation of ossification	GO:0045778	0.0101759	1.99243	54	265	7	21092	BMP6,FZD9,WNT10B,OSR1,ADRB2,BMP2,FAM20C
	wound healing	GO:0042060	0.0102679	1.98852	441	155	14	21092	KRT1,ITGB3,E9PSI1,SERPINB2,S100A8,TNFAIP3,IL1A,SPRR3,HBEGF,KRT6A,CARMIL2,TGFA,F3,THBS1
	cell-cell signaling	GO:0007267	0.0103117	1.98667	1663	257	42	21092	GREM1,CPLX1,S100A8,PTHLH,BMP6,TNFAIP3,IL1B,EDNRA,FZD8,SLC44A4,JPH3,IL1A,GAL,SNCB,RELN,PTGES,MESP1,HIC1,ADRA1D,SERPINB3,FZD9,SLC16A2,WNT10B,PTGS2,GJB3,GJB4,VGF,INHBA,NGF,EDN1,NR4A1,HTR1D,NOG,S100A9,IL11,MAPK8IP2,APC2,ADRB2,BMP2,TFR2,NEURL1,FOXD1
	endothelial cell differentiation	GO:0045446	0.0103179	1.98641	112	178	8	21092	BMP6,RAPGEF3,IL1B,EDNRA,ID1,MESP1,XDH,ROBO4
	intermediate filament organization	GO:0045109	0.010566	1.97609	68	136	6	21092	KRT81,KRT1,KRT6B,KRT6C,KRT75,KRT6A
	response to wounding	GO:0009611	0.0106111	1.97424	572	173	17	21092	KRT1,ITGB3,E9PSI1,SERPINB2,S100A8,KLK6,TNFAIP3,EDNRA,IL1A,SPRR3,HBEGF,KRT6A,CARMIL2,TGFA,F3,THBS1,JUN
	regulation of neurogenesis	GO:0050767	0.0107767	1.96751	370	266	17	21092	HES5,ID4,IL1B,ID2,DLL4,RELN,ID1,DLX2,ZNF365,NGF,NOG,SEMA7A,DLL3,BMP2,NEURL1,PLXNA2,DSCAM
	regulation of biomineral tissue development	GO:0070167	0.0108212	1.96573	101	265	9	21092	GREM1,BMP6,FZD9,WNT10B,OSR1,ADRB2,BMP2,ECM1,FAM20C
	positive regulation of biomineralization	GO:0110151	0.0115359	1.93795	55	265	7	21092	BMP6,FZD9,WNT10B,OSR1,ADRB2,BMP2,FAM20C
	astrocyte differentiation	GO:0048708	0.0117359	1.93048	81	252	8	21092	HES5,ID4,S100A8,IL1B,ID2,NOG,S100A9,BMP2
	cellular response to molecule of bacterial origin	GO:0071219	0.0118274	1.92711	219	93	8	21092	CSF3,CXCL1,CXCL8,BMP6,TNFAIP3,IL1B,IL1A,CXCL3
	muscle cell proliferation	GO:0033002	0.0120091	1.92049	201	252	12	21092	ITGB3,HES5,TNFAIP3,ID2,HBEGF,THBS1,PTGS2,JUN,EDN1,FOXC2,NOG,BMP2
	epidermal growth factor receptor signaling pathway	GO:0007173	0.0123415	1.90863	103	264	9	21092	HBEGF,TGFA,IFI6,NCF1,GPRC5A,FAM83A,BCAR3,NEURL1,CEACAM1
	blood vessel endothelial cell migration	GO:0043534	0.0123557	1.90813	115	236	9	21092	GREM1,DLL4,ID1,THBS1,PTGS2,EPHA1,NR4A1,FOXC2,ETS1
	regulation of biomineralization	GO:0110149	0.0127241	1.89537	103	265	9	21092	GREM1,BMP6,FZD9,WNT10B,OSR1,ADRB2,BMP2,ECM1,FAM20C
	positive regulation of MAPK cascade	GO:0043410	0.012825	1.89194	483	252	19	21092	ITGB3,IL1B,FZD8,IL1A,ADRA1D,ADAM8,TGFA,THBS1,JUN,XDH,NCF1,EDN1,BCAR3,SEMA7A,IL11,SPHK1,MAPK8IP2,ADRB2,BMP2
	cell development	GO:0048468	0.0129668	1.88717	2142	266	51	21092	ITGB3,HES5,ID4,S100A8,OSBP2,KLK6,PTHLH,BMP6,RAPGEF3,IL1B,EDNRA,ID2,SLC44A4,IL1A,DLL4,RELN,ID1,PRDM1,NRCAM,CFAP157,SPRY4,FLNC,PREX1,WNT10B,DLX2,ZNF365,PRDM8,UNC13D,JUN,ROBO4,BCL2L1,EHD1,EPHA1,PRDM12,NGF,EDN1,OSR1,FOXC2,NOG,SEMA7A,S100A9,DLL3,PLD6,MAPK8IP2,BMP2,NEURL1,FOXD1,ECM1,PLXNA2,FAM20C,DSCAM
	leukocyte differentiation	GO:0002521	0.0143543	1.84302	595	265	22	21092	CSF3,IL1B,ID2,FZD8,DHRS2,IL1A,DLL4,PRDM1,ADAM8,FZD9,PREX1,WNT10B,JUN,IFNK,INHBA,EPHA1,RELB,IL11,HCLS1,SOCS1,CEACAM1,FAM20C
	positive regulation of peptidyl-serine phosphorylation	GO:0033138	0.0153418	1.81412	109	256	9	21092	CSF3,RAPGEF3,PTGS2,IFNK,NGF,BCAR3,IL11,HCLS1,SH2D3A
	negative regulation of cell development	GO:0010721	0.0157701	1.80217	181	240	11	21092	HES5,ID4,PTHLH,IL1B,IL1A,ID1,SPRY4,DLX2,NOG,SEMA7A,DLL3
	response to lipid	GO:0033993	0.0163194	1.7873	909	259	28	21092	CSF3,CXCL1,CXCL8,S100A8,BMP6,TNFAIP3,FOSL1,IL1B,SLPI,HOXD13,IL1A,CXCL3,GRAMD1B,AQP3,CXCL2,THBS1,WNT10B,PTGS2,BDKRB1,GJB3,INHBA,EDN1,NR4A1,OSR1,IRAK2,S100A9,CYP24A1,FOSB
	positive regulation of epithelial cell differentiation	GO:0030858	0.0167714	1.77543	61	252	7	21092	BMP6,ZBED2,MESP1,ALOX15B,WNT10B,SULT2B1,BMP2
	growth	GO:0040007	0.0167865	1.77504	972	270	30	21092	GREM1,S100A8,KLK6,EDNRA,SLC44A4,HOXD13,MESP1,HBEGF,ALOX15B,NRCAM,CDA,FZD9,WNT10B,SOCS3,BDKRB1,BCL2L1,INHBA,NGF,EDN1,FOXC2,NOG,SEMA7A,S100A9,SPHK1,SOCS1,ADRB2,ECM1,CEACAM1,DSCAM,CCDC85B
	positive regulation of prostaglandin secretion	GO:0032308	0.0170697	1.76777	14	206	4	21092	IL1B,IL1A,PTGES,EDN1
	regulation of smooth muscle cell proliferation	GO:0048660	0.0172558	1.76306	142	252	10	21092	ITGB3,HES5,TNFAIP3,ID2,HBEGF,THBS1,PTGS2,JUN,EDN1,BMP2
	osteoblast differentiation	GO:0001649	0.0178307	1.74883	228	271	13	21092	ID4,GREM1,SNAI1,PTHLH,BMP6,WNT10B,EPHA1,NOG,SEMA7A,CYP24A1,BMP2,FAM20C,SMOC1
	gastrulation	GO:0007369	0.0190731	1.71958	191	232	11	21092	ITGB3,SNAI1,DUSP4,DUSP5,DUSP2,MESP1,INHBA,EPHA1,OSR1,FOXC2,NOG
	tissue remodeling	GO:0048771	0.019086	1.71928	168	264	11	21092	ITGB3,GREM1,TNFAIP3,EDNRA,IL1A,DLL4,ADAM8,EPHA1,FOXC2,ADRB2,CEACAM1
	regulation of endothelial cell proliferation	GO:0001936	0.0194109	1.71195	139	261	10	21092	ITGB3,BMP6,DLL4,F3,THBS1,JUN,XDH,NR4A1,BMP2,ECM1
	cartilage development	GO:0051216	0.0199184	1.70075	204	261	12	21092	HES5,GREM1,SNAI1,PTHLH,BMP6,WNT10B,DLX2,EDN1,OSR1,NOG,BMP2,ECM1
	sensory organ development	GO:0007423	0.0204866	1.68853	595	271	22	21092	MYO7B,HES5,BMP6,EDNRA,SLC44A4,DLL4,PRDM1,WNT10B,DLX2,JUN,INHBA,EPHA1,EDN1,FOXF2,OSR1,FOXC2,NOG,BCAR3,BMP2,DSCAM,FJX1,SMOC1
	regulation of DNA-binding transcription factor activity	GO:0051090	0.0206711	1.68464	437	262	18	21092	CSF3,GREM1,S100A8,TNFAIP3,FOSL1,IL1B,ID2,RELN,ID1,ADAM8,WNT10B,EDN1,IRAK2,S100A9,SPHK1,HCLS1,BMP2,NFKBIE
	regulation of protein metabolic process	GO:0051246	0.0214035	1.66951	2567	264	57	21092	ITGB3,PI3,CSF3,A2ML1,HES5,SERPINB2,GREM1,S100A8,BMP6,TNFAIP3,RAPGEF3,IL1B,FZD8,SLPI,RELN,HBEGF,ODC1,ADAM8,SERPINB3,TGFA,SPRY4,F3,THBS1,WNT10B,IFI6,PTGS2,JUN,SOCS3,BDKRB1,XDH,IFNK,INHBA,DLC1,PRDM12,SERPINB8,NCF1,NGF,EDN1,GPRC5A,NR4A1,FOXF2,NOG,BCAR3,SEMA7A,S100A9,IL11,SPHK1,HCLS1,SOCS1,APC2,ADRB2,BMP2,TFR2,NEURL1,SH2D3A,ECM1,CEACAM1
	defense response to bacterium	GO:0042742	0.0216088	1.66537	369	197	14	21092	PI3,GSDMA,S100A8,IL1B,SLPI,SPRR2A,KLK7,RNASE7,KRT6A,OAS1,ARG2,VGF,LCN2,EPHA1
	response to cytokine	GO:0034097	0.0220245	1.65709	906	264	28	21092	CSF3,CXCL1,CXCL8,CDC42EP2,TNFAIP3,FOSL1,IL1B,IL1A,IFI27,CXCL3,MX1,CXCL2,SPRY4,F3,THBS1,OAS1,PTGS2,SOCS3,IFNK,BCL2L1,EDN1,IRAK2,RELB,SPHK1,HCLS1,SOCS1,ECM1,CEACAM1
	smooth muscle cell proliferation	GO:0048659	0.0220514	1.65656	146	252	10	21092	ITGB3,HES5,TNFAIP3,ID2,HBEGF,THBS1,PTGS2,JUN,EDN1,BMP2
	cytokine-mediated signaling pathway	GO:0019221	0.0221771	1.6541	479	264	19	21092	CSF3,CXCL1,CXCL8,TNFAIP3,IL1B,IL1A,IFI27,CXCL3,MX1,CXCL2,F3,OAS1,IFNK,EDN1,IRAK2,SPHK1,SOCS1,ECM1,CEACAM1
	regulation of prostaglandin secretion	GO:0032306	0.023099	1.63641	15	206	4	21092	IL1B,IL1A,PTGES,EDN1
	leukocyte chemotaxis	GO:0030595	0.0235277	1.62842	239	155	10	21092	CXCL1,CXCL8,GREM1,S100A8,IL1B,CXCL3,CXCL2,ADAM8,PREX1,THBS1
	regulation of defense response	GO:0031347	0.0256934	1.59018	620	264	22	21092	KRT1,S100A8,MMP3,PIK3AP1,TNFAIP3,IL1B,PTGES,KLK7,ADAM8,OAS1,PTGS2,SOCS3,IFNK,ARG2,NCF1,METRNL,SEMA7A,ETS1,S100A9,SPHK1,SOCS1,CEACAM1
	biomineral tissue development	GO:0031214	0.0275541	1.55981	174	265	11	21092	GREM1,PTHLH,BMP6,FZD9,WNT10B,PTGS2,OSR1,ADRB2,BMP2,ECM1,FAM20C
	positive regulation of epidermal growth factor-activated receptor activity	GO:0045741	0.0285279	1.54473	13	255	4	21092	HBEGF,TGFA,NCF1,NEURL1
	mesoderm formation	GO:0001707	0.0297495	1.52652	72	232	7	21092	ITGB3,SNAI1,MESP1,INHBA,EPHA1,FOXC2,NOG
	positive regulation of molecular function	GO:0044093	0.0299418	1.52372	1573	255	39	21092	ITGB3,CSF3,GREM1,S100A8,FOSL1,RAPGEF3,IL1B,EDNRA,FZD8,GAL,RELN,RGS16,HBEGF,ADAM8,IL32,SERPINB3,TGFA,F3,PREX1,THBS1,WNT10B,XDH,EPHA1,DLC1,NCF1,NGF,EDN1,GPRC5A,IRAK2,BCAR3,S100A9,SPHK1,HCLS1,SOCS1,APC2,TBC1D30,ADRB2,BMP2,NEURL1
	peptidyl-tyrosine phosphorylation	GO:0018108	0.0302713	1.51897	375	255	16	21092	ITGB3,CSF3,HES5,GREM1,BMP6,RELN,HBEGF,TGFA,SOCS3,EPHA1,NCF1,GPRC5A,IL11,HCLS1,SOCS1,NEURL1
	kidney epithelium development	GO:0072073	0.0312526	1.50511	149	257	10	21092	HES5,GREM1,EDNRA,HS3ST3A1,ARG2,OSR1,FOXC2,NOG,BMP2,FOXD1
	negative regulation of epithelial cell differentiation	GO:0030857	0.0317839	1.49779	49	231	6	21092	HES5,IL1A,ID1,XDH,OSR1,FST
	nephron epithelium development	GO:0072009	0.0323161	1.49058	119	257	9	21092	HES5,GREM1,EDNRA,HS3ST3A1,OSR1,FOXC2,NOG,BMP2,FOXD1
	peptidyl-tyrosine modification	GO:0018212	0.0323176	1.49056	377	255	16	21092	ITGB3,CSF3,HES5,GREM1,BMP6,RELN,HBEGF,TGFA,SOCS3,EPHA1,NCF1,GPRC5A,IL11,HCLS1,SOCS1,NEURL1
	leukocyte activation	GO:0045321	0.0324933	1.48821	995	246	28	21092	CXCL8,TNFAIP3,IL1B,SH2D2A,ID2,FZD8,DHRS2,SLAMF9,IL1A,GAL,DLL4,PRDM1,ADAM8,FZD9,PREX1,THBS1,WNT10B,UNC13D,JUN,IFNK,ARG2,INHBA,EDN1,LGALS7B,RELB,IL11,SPHK1,SOCS1
	regulation of epidermal cell differentiation	GO:0045604	0.0336511	1.473	58	196	6	21092	HES5,MAFF,ZBED2,ALOX15B,AQP3,SULT2B1
	mesoderm morphogenesis	GO:0048332	0.0356722	1.44767	74	232	7	21092	ITGB3,SNAI1,MESP1,INHBA,EPHA1,FOXC2,NOG
	negative regulation of apoptotic signaling pathway	GO:2001234	0.0382108	1.41781	230	247	12	21092	SNAI1,TNFAIP3,IL1B,IL1A,FZD9,THBS1,IFI6,PTGS2,BCL2L1,BCL2L2-PABPN1,NOG,MAPK8IP2
	regulation of endopeptidase activity	GO:0052548	0.0385644	1.41381	414	210	15	21092	PI3,A2ML1,SERPINB2,S100A8,SLPI,SERPINB3,F3,THBS1,IFI6,PTGS2,XDH,DLC1,SERPINB8,NGF,NR4A1
	regulation of protein tyrosine kinase activity	GO:0061097	0.0387027	1.41226	94	255	8	21092	ITGB3,GREM1,RELN,HBEGF,TGFA,NCF1,GPRC5A,NEURL1
	epithelial tube morphogenesis	GO:0060562	0.0389672	1.4093	338	257	15	21092	HES5,GREM1,EDNRA,HS3ST3A1,DLL4,MESP1,MICAL2,EPHA1,DLC1,EDN1,OSR1,FOXC2,NOG,BMP2,FOXD1
	regulation of fatty acid transport	GO:2000191	0.0389716	1.40925	34	206	5	21092	IL1B,IL1A,PTGES,THBS1,EDN1
	biomineralization	GO:0110148	0.0398689	1.39937	181	265	11	21092	GREM1,PTHLH,BMP6,FZD9,WNT10B,PTGS2,OSR1,ADRB2,BMP2,ECM1,FAM20C
	regulation of growth	GO:0040008	0.0404809	1.39275	671	270	23	21092	GREM1,S100A8,SLC44A4,HBEGF,ALOX15B,NRCAM,CDA,SOCS3,BDKRB1,BCL2L1,INHBA,NGF,EDN1,FOXC2,NOG,SEMA7A,S100A9,SPHK1,SOCS1,ADRB2,CEACAM1,DSCAM,CCDC85B
	nephron development	GO:0072006	0.0416499	1.38039	154	257	10	21092	ITGB3,HES5,GREM1,EDNRA,HS3ST3A1,OSR1,FOXC2,NOG,BMP2,FOXD1
	response to endogenous stimulus	GO:0009719	0.0422443	1.37423	1592	265	40	21092	ITGB3,CXCL8,HES5,GREM1,BMP6,FOSL1,RAPGEF3,IL1B,EDNRA,GAL,DLL4,CITED4,ID1,SPRY4,THBS1,WNT10B,PTGS2,JUN,SOCS3,VGF,BCL2L1,INHBA,EHD1,NGF,EDN1,NR4A1,HTR1D,FOXC2,FST,NOG,BCAR3,HCLS1,SOCS1,ADRB2,BMP2,NEURL1,FOXD1,FOSB,CEACAM1,FAM20C
	regulation of hydrolase activity	GO:0051336	0.0429732	1.3668	996	263	29	21092	PI3,A2ML1,SERPINB2,S100A8,RAPGEF3,EDNRA,SLPI,RGS16,SERPINB3,F3,PREX1,THBS1,IFI6,OAS1,PTGS2,XDH,RASA4B,EPHA1,DLC1,SERPINB8,NGF,NR4A1,BCAR3,S100A9,APC2,TBC1D30,BMP2,ECM1,PLXNA2
	ERBB signaling pathway	GO:0038127	0.0456916	1.34016	121	264	9	21092	HBEGF,TGFA,IFI6,NCF1,GPRC5A,FAM83A,BCAR3,NEURL1,CEACAM1
	positive regulation of p38MAPK cascade	GO:1900745	0.045787	1.33926	29	252	5	21092	IL1B,XDH,NCF1,SPHK1,BMP2
	regulation of astrocyte differentiation	GO:0048710	0.045787	1.33926	29	252	5	21092	HES5,ID4,ID2,NOG,BMP2
	branching morphogenesis of an epithelial tube	GO:0048754	0.0465722	1.33187	156	257	10	21092	GREM1,EDNRA,HS3ST3A1,DLL4,EPHA1,EDN1,FOXC2,NOG,BMP2,FOXD1
	regulation of ossification	GO:0030278	0.0470725	1.32723	121	265	9	21092	GREM1,BMP6,FZD9,WNT10B,OSR1,ADRB2,BMP2,ECM1,FAM20C
	intermediate filament cytoskeleton organization	GO:0045104	0.0470811	1.32715	88	136	6	21092	KRT81,KRT1,KRT6B,KRT6C,KRT75,KRT6A
	cell migration involved in sprouting angiogenesis	GO:0002042	0.0483723	1.3154	54	225	6	21092	GREM1,DLL4,THBS1,PTGS2,NR4A1,FOXC2
	glial cell differentiation	GO:0010001	0.0486302	1.31309	231	252	12	21092	HES5,ID4,S100A8,IL1B,ID2,RELN,DLX2,ZNF365,PRDM8,NOG,S100A9,BMP2
	mesoderm development	GO:0007498	0.0487039	1.31244	134	240	9	21092	ITGB3,SNAI1,MESP1,INHBA,EPHA1,OSR1,FOXC2,NOG,DLL3
	cornified envelope	GO:0001533	9.27897e-16	15.0325	58	113	13	21690	KRT1,PI3,SPRR1B,SPRR2D,IVL,SERPINB2,SPRR2E,KLK6,SPRR2A,SPRR3,KRT75,KLK7,TGM1
GO:CC	secretory vesicle	GO:0099503	0.0024092	2.61813	1043	206	26	21690	KRT1,ITGB3,CXCL1,KLK10,S100A8,S100P,KLK6,IL1B,PRSS3,NCF2,SLPI,SPRR2A,GAL,KLK7,CDA,ADAM8,SERPINB3,THBS1,ATAD3B,RAB3IL1,UNC13D,VGF,BCL2L1,LCN2,NGF,EDN1
	secretory granule	GO:0030141	0.00290645	2.53664	870	190	22	21690	KRT1,ITGB3,CXCL1,KLK10,S100A8,S100P,KLK6,IL1B,PRSS3,NCF2,SLPI,SPRR2A,GAL,KLK7,CDA,ADAM8,SERPINB3,THBS1,ATAD3B,UNC13D,VGF,LCN2
	phagolysosome	GO:0032010	0.00561486	2.25066	6	204	3	21690	NCF2,ADAM8,NCF1
	keratin filament	GO:0045095	0.0156388	1.8058	102	136	6	21690	KRT81,KRT1,KRT6B,KRT6C,KRT75,KRT6A
KEGG	IL-17 signaling pathway	KEGG:04657	1.73535e-05	4.76061	92	259	15	8064	CSF3,CXCL1,CXCL8,S100A8,MMP3,TNFAIP3,FOSL1,IL1B,CXCL3,CXCL2,PTGS2,JUN,LCN2,S100A9,FOSB
	Rheumatoid arthritis	KEGG:05323	0.0461842	1.33551	88	93	6	8064	CXCL1,CXCL8,MMP3,IL1B,IL1A,CXCL3
REAC	Formation of the cornified envelope	REAC:R-HSA-6809371	2.3609e-08	7.62692	128	42	10	10461	KRT81,KRT1,PI3,LCE3D,SPRR1B,SPRR2D,KRT6B,IVL,SPRR2E,KRT6C
	Keratinization	REAC:R-HSA-6805567	3.83085e-06	5.41671	215	42	10	10461	KRT81,KRT1,PI3,LCE3D,SPRR1B,SPRR2D,KRT6B,IVL,SPRR2E,KRT6C
	Interleukin-10 signaling	REAC:R-HSA-6783783	0.00268879	2.57044	45	167	7	10461	CSF3,CXCL1,CXCL8,IL1B,IL1A,CXCL2,PTGS2
	NGF-stimulated transcription	REAC:R-HSA-9031628	0.0173985	1.75949	39	259	7	10461	ID4,FOSL1,ID2,ID1,F3,VGF,FOSB
	Nuclear Events (kinase and transcription factor activation)	REAC:R-HSA-198725	0.0412346	1.38474	61	186	7	10461	ID4,FOSL1,DUSP4,ID2,ID1,F3,VGF
WP	Prostaglandin signaling	WP:WP5088	0.00895972	2.04771	33	100	5	7827	CXCL1,CXCL8,IL1B,IL1A,PTGES
	Cytokines and inflammatory response	WP:WP530	0.00982705	2.00758	26	131	5	7827	CSF3,CXCL1,IL1B,IL1A,CXCL2
	Photodynamic therapy-induced NF-kB survival signaling	WP:WP3617	0.0101709	1.99264	35	233	7	7827	CXCL8,MMP3,IL1B,IL1A,CXCL2,PTGS2,RELB
	COVID-19 adverse outcome pathway	WP:WP4891	0.0394771	1.40365	15	66	3	7827	CSF3,CXCL8,IL1B
