# Supplementary material for: Endo180 and basement membrane stiffness induce OXPHOS and neoplasia in aging prostate epithelia
Source: Research Square preprint supplement (doi:10.21203/rs.3.rs-4837876/v1), 2024-09-19
Supplement: Supplementary file 10 [file ce611fb84afc821b4881dfe3.xlsx]

## Sheet: UP (stiff vs native)
Supplementary data 1. DEGs in Wt-acini in stiff-BM versus native-BM
Gene Name	Ensembl Identifier	Fold change (FC ≥ 2)	Log fold change	p value (p < 0.05)	FDR p value (p < 0.05)
HIST1H2AK	ENSG00000275221	480.955	8.90976	0.000207618	0.00280408
CORO7-PAM16	ENSG00000103426	163.494	7.35309	0.00467625	0.0303498
TGIF2-RAB5IF	ENSG00000259399	102.468	6.67903	0.00604794	0.0367471
MT-ATP8	ENSG00000228253	22.0957	4.4657	0	0
EDIL3	ENSG00000164176	19.3072	4.27106	2.08037e-05	0.000484831
GPC4	ENSG00000076716	18.5092	4.21017	0.00294906	0.0213131
TMEM256-PLSCR3	ENSG00000262481	15.4764	3.95199	2.74841e-06	0.000102124
TAS2R4	ENSG00000127364	12.4473	3.63776	0.000575376	0.00611621
ZNF117	ENSG00000152926	10.4139	3.38044	0.000317202	0.00387923
MT-ND2	ENSG00000198763	10.3487	3.37138	6.10623e-15	4.05346e-12
MT-ATP6	ENSG00000198899	10.3264	3.36827	9.72555e-14	5.36526e-11
MT-ND4L	ENSG00000212907	10.0335	3.32676	9.99201e-16	8.59912e-13
SCHIP1	ENSG00000151967	8.61242	3.10642	0.00168033	0.0139963
MT-ND6	ENSG00000198695	8.55545	3.09684	9.25926e-14	5.24245e-11
MT-ND4	ENSG00000198886	7.92861	2.98707	4.35152e-12	1.48608e-09
MT-ND1	ENSG00000198888	7.87767	2.97777	2.77189e-12	1.08431e-09
ASPN	ENSG00000106819	7.37867	2.88336	0.00709141	0.0414259
TMEM37	ENSG00000171227	7.37693	2.88302	0.00899688	0.0496254
MT-ND5	ENSG00000198786	6.95272	2.79758	1.83742e-13	8.98456e-11
MT-ND3	ENSG00000198840	6.4925	2.69877	2.799e-10	5.64423e-08
SLITRK5	ENSG00000165300	6.4665	2.69299	0.000156057	0.0022717
CCDC102B	ENSG00000150636	5.83755	2.54536	6.51231e-06	0.000203652
AC000120.3	ENSG00000285953	5.81282	2.53924	0.000627107	0.00651855
PLSCR4	ENSG00000114698	5.58353	2.48118	0.00192072	0.0155063
RNF150	ENSG00000170153	5.53634	2.46893	3.19988e-12	1.15953e-09
ZNF429	ENSG00000197013	5.36104	2.42251	3.97292e-05	0.000802604
TPRG1	ENSG00000188001	5.3354	2.4156	0.00176678	0.0145418
MT-CO2	ENSG00000198712	5.22673	2.38591	8.68374e-08	6.55546e-06
AC138969.1	ENSG00000183889	5.21835	2.38359	1.21427e-07	8.42742e-06
ATP8A1	ENSG00000124406	5.08378	2.3459	1.48187e-06	6.3511e-05
SULT1E1	ENSG00000109193	5.04982	2.33623	0.0025033	0.0189176
COL4A4	ENSG00000081052	4.99517	2.32053	0.00626692	0.0376838
C1QL3	ENSG00000165985	4.79866	2.26263	0.00703271	0.0411613
LINC00672	ENSG00000263874	4.79818	2.26249	0.00639847	0.0382716
METTL7A	ENSG00000185432	4.66152	2.2208	9.95659e-07	4.61489e-05
ZNF396	ENSG00000186496	4.62906	2.21072	0.00278101	0.0203691
CDRT4	ENSG00000239704	4.59807	2.20103	0.00830703	0.0467379
KLF15	ENSG00000163884	4.54587	2.18456	0.0034372	0.0239946
GRIK2	ENSG00000164418	4.54499	2.18428	0.0038719	0.0262623
RMDN2	ENSG00000115841	4.50986	2.17308	0.00184483	0.0150404
PDE3B	ENSG00000152270	4.37405	2.12897	0.00254297	0.0190967
C1QTNF5	ENSG00000223953	4.37199	2.12829	0.00116016	0.0104526
ZNF20	ENSG00000132010	4.33225	2.11512	5.48785e-05	0.00102315
SEM1	ENSG00000127922	4.29351	2.10216	8.46656e-13	3.71751e-10
POU5F2	ENSG00000248483	4.23287	2.08163	0.000545858	0.0058662
COL26A1	ENSG00000160963	4.22661	2.0795	0.00738077	0.0426411
ZNF43	ENSG00000198521	4.22513	2.079	0.00280814	0.02055
PDK4	ENSG00000004799	4.1843	2.06499	1.28342e-13	6.57446e-11
FAM47E	ENSG00000189157	4.1721	2.06077	0.00268107	0.0198224
GOLGA6L10	ENSG00000278662	4.15404	2.05451	0.00152386	0.0129435
AC104452.1	ENSG00000283189	4.09558	2.03407	0.00103051	0.00954429
ZNF546	ENSG00000187187	4.04633	2.01661	5.9089e-06	0.000188901
WNT3A	ENSG00000154342	3.95249	1.98276	2.31429e-05	0.000522475
KRT15	ENSG00000171346	3.89533	1.96175	2.22045e-16	2.38864e-13
CAMK2B	ENSG00000058404	3.82056	1.93378	0	0
EPHA7	ENSG00000135333	3.79988	1.92595	1.0103e-14	6.39314e-12
RPS27	ENSG00000177954	3.78517	1.92036	2.04396e-11	6.10776e-09
SLC16A7	ENSG00000118596	3.77538	1.91662	5.13067e-05	0.00097687
TBX2	ENSG00000121068	3.74002	1.90305	2.146e-07	1.37414e-05
SMIM11B	ENSG00000273590	3.70007	1.88755	5.0114e-05	0.000960965
OGN	ENSG00000106809	3.69396	1.88517	0.00732551	0.0424304
MAN1C1	ENSG00000117643	3.64367	1.86539	0.00358364	0.0247034
AMOT	ENSG00000126016	3.60365	1.84946	0.00169479	0.0140677
KCNJ13	ENSG00000115474	3.59616	1.84646	0.00547322	0.0341739
ZNF713	ENSG00000178665	3.51876	1.81507	0.000116554	0.00181979
UGT1A7	ENSG00000244122	3.50216	1.80824	0.00527709	0.0332684
HPGD	ENSG00000164120	3.47598	1.79742	0.00332412	0.0233492
CFH	ENSG00000000971	3.44889	1.78613	3.11121e-05	0.000660787
ZNF112	ENSG00000062370	3.44346	1.78386	8.52325e-09	9.99305e-07
CNTNAP2	ENSG00000174469	3.43696	1.78113	0.00338816	0.0237447
CLGN	ENSG00000153132	3.43146	1.77882	0.00732661	0.0424304
SESN3	ENSG00000149212	3.42543	1.77628	0	0
SYT12	ENSG00000173227	3.42263	1.77511	9.07872e-07	4.32143e-05
AGR2	ENSG00000106541	3.39603	1.76385	2.45981e-09	3.72695e-07
ECM2	ENSG00000106823	3.38425	1.75884	0.000973904	0.00912611
TFPI	ENSG00000003436	3.31496	1.72899	6.45498e-06	0.000202153
AC017083.3	ENSG00000273398	3.30579	1.725	0.00173388	0.0143313
AL355312.6	ENSG00000285991	3.26598	1.70752	0.00492748	0.0315802
ZBTB16	ENSG00000109906	3.26299	1.7062	1.23135e-11	3.83949e-09
CCDC144A	ENSG00000170160	3.24164	1.69672	0.000296739	0.00370322
C12orf60	ENSG00000182993	3.24066	1.69629	7.90841e-05	0.00135469
ZNF682	ENSG00000197124	3.22936	1.69125	0.00136916	0.0118876
RGCC	ENSG00000102760	3.14824	1.65454	0.00299609	0.0215516
MNS1	ENSG00000138587	3.12016	1.64162	0.00042181	0.004817
KCTD16	ENSG00000183775	3.10482	1.63451	0.00644487	0.0384747
SALL4	ENSG00000101115	3.10255	1.63345	0.000283064	0.00355731
CFAP44	ENSG00000206530	3.04878	1.60823	8.30335e-06	0.000245057
ADAM22	ENSG00000008277	3.0211	1.59507	0.00711319	0.0415419
CHGB	ENSG00000089199	3.02078	1.59492	0.00873989	0.0485136
FKBP7	ENSG00000079150	3.00932	1.58944	0.000358002	0.00425313
NBEA	ENSG00000172915	3.00821	1.58891	0.00014979	0.00220584
VAV3	ENSG00000134215	2.99479	1.58246	8.27802e-08	6.31566e-06
SEMA6B	ENSG00000167680	2.95938	1.5653	0.00240615	0.018398
KCNJ2	ENSG00000123700	2.93887	1.55526	4.04757e-05	0.000813568
SEPT1	ENSG00000180096	2.93493	1.55332	0.00820486	0.0463701
ALDH1L1	ENSG00000144908	2.93442	1.55307	0.000706712	0.00712842
SUSD2	ENSG00000099994	2.93137	1.55157	1.33227e-15	1.06162e-12
ISY1-RAB43	ENSG00000261796	2.90785	1.53995	0.00898273	0.0496056
KIAA0825	ENSG00000185261	2.89592	1.53402	1.84956e-05	0.000441656
TGFB2	ENSG00000092969	2.87075	1.52143	1.20965e-05	0.000322296
ZNF14	ENSG00000105708	2.85422	1.5131	7.73422e-08	5.98567e-06
SPINK5	ENSG00000133710	2.85165	1.51179	0.00101492	0.00943786
ZNF415	ENSG00000170954	2.8086	1.48985	0.00260463	0.0194269
ANKRD36B	ENSG00000196912	2.80726	1.48916	5.91536e-09	7.35659e-07
ITGB3BP	ENSG00000142856	2.80032	1.48559	2.91989e-14	1.7949e-11
LCA5	ENSG00000135338	2.79335	1.48199	9.94848e-07	4.61489e-05
DPYSL4	ENSG00000151640	2.78048	1.47533	0.00414502	0.0276442
ZNF658	ENSG00000274349	2.77983	1.47499	2.20901e-09	3.44398e-07
ZNF608	ENSG00000168916	2.77238	1.47112	0	0
FAM227A	ENSG00000184949	2.76006	1.4647	0.000559824	0.00597451
ETFRF1	ENSG00000205707	2.74493	1.45677	7.72882e-06	0.000233219
CFAP70	ENSG00000156042	2.73982	1.45408	0.00518911	0.0328944
AC008770.4	ENSG00000286098	2.73125	1.44956	9.37209e-05	0.00154277
CYP39A1	ENSG00000146233	2.71415	1.4405	0.00145024	0.0124432
PFDN4	ENSG00000101132	2.71195	1.43933	3.97023e-09	5.44074e-07
AC098850.3	ENSG00000266302	2.70013	1.43303	0.00609454	0.0369259
PLIN4	ENSG00000167676	2.68849	1.4268	2.63276e-08	2.55152e-06
COL8A1	ENSG00000144810	2.65984	1.41134	1.67997e-05	0.000413801
C21orf91	ENSG00000154642	2.65354	1.40792	5.07474e-11	1.38206e-08
ZNF91	ENSG00000167232	2.64645	1.40406	3.85672e-06	0.000134267
ZNF138	ENSG00000197008	2.63866	1.3998	0.000167684	0.0023909
ZNF107	ENSG00000196247	2.62743	1.39365	3.6772e-06	0.00012925
TENT5C	ENSG00000183508	2.61801	1.38847	1.25399e-06	5.60905e-05
SPTSSB	ENSG00000196542	2.61071	1.38444	0.00720822	0.0419179
LIFR	ENSG00000113594	2.60748	1.38266	1.5786e-06	6.71216e-05
BMP7	ENSG00000101144	2.58858	1.37216	3.18164e-06	0.00011549
CXXC5	ENSG00000171604	2.58797	1.37182	1.28723e-05	0.000337328
PRKG2	ENSG00000138669	2.58117	1.36803	0.000466401	0.00518854
PADI2	ENSG00000117115	2.58032	1.36755	0.000497509	0.00545659
ZNF605	ENSG00000196458	2.56119	1.35681	5.42046e-09	6.98131e-07
PROCA1	ENSG00000167525	2.55849	1.35529	0.00768838	0.0440052
MT-CYB	ENSG00000198727	2.55411	1.35282	3.38857e-09	4.8244e-07
DOCK10	ENSG00000135905	2.532	1.34028	0.00778673	0.044438
ZFP14	ENSG00000142065	2.53171	1.34011	0.00015393	0.00224529
TRIM2	ENSG00000109654	2.52729	1.33759	3.10416e-11	8.9048e-09
RASSF9	ENSG00000198774	2.51591	1.33108	2.72899e-06	0.000101934
TRPV4	ENSG00000111199	2.51451	1.33027	0.000118311	0.00184454
PPM1L	ENSG00000163590	2.51217	1.32894	0.000901344	0.00859974
SOX6	ENSG00000110693	2.50754	1.32628	0.00568818	0.0351468
TBC1D32	ENSG00000146350	2.49223	1.31744	7.38629e-09	8.92786e-07
CACNB4	ENSG00000182389	2.49221	1.31742	1.99873e-12	8.26976e-10
CEP70	ENSG00000114107	2.49195	1.31727	5.61977e-09	7.11231e-07
ZNF10	ENSG00000256223	2.4882	1.3151	0.000890005	0.00850665
GRAMD1C	ENSG00000178075	2.47612	1.30808	7.1392e-05	0.0012518
PLCB1	ENSG00000182621	2.47476	1.30729	1.75723e-08	1.85328e-06
ADSSL1	ENSG00000185100	2.46769	1.30316	3.46285e-06	0.000123159
ZNF709	ENSG00000242852	2.44527	1.28999	0.0016659	0.0139029
ACTR3C	ENSG00000106526	2.44198	1.28805	0.000455924	0.00509834
ETV1	ENSG00000006468	2.43764	1.28548	9.16625e-08	6.73078e-06
LMBRD2	ENSG00000164187	2.42926	1.28052	1.28529e-11	3.95044e-09
PDE5A	ENSG00000138735	2.42628	1.27875	8.38715e-08	6.37631e-06
PLXDC2	ENSG00000120594	2.42591	1.27853	0.0013355	0.0116565
ZNF280D	ENSG00000137871	2.42572	1.27842	2.77285e-08	2.6633e-06
ZC2HC1A	ENSG00000104427	2.42522	1.27812	2.24104e-05	0.000509045
ERV3-1	ENSG00000213462	2.42177	1.27606	0.000221131	0.00295688
CEP290	ENSG00000198707	2.40365	1.26523	0.000253726	0.00328059
CLEC2D	ENSG00000069493	2.4026	1.2646	0.00118693	0.0106538
SLC25A27	ENSG00000153291	2.39004	1.25703	0.00457063	0.0298172
C8orf59	ENSG00000176731	2.38851	1.25611	0	0
ZNF334	ENSG00000198185	2.38362	1.25315	0.00382693	0.0260311
NDUFB1	ENSG00000183648	2.37927	1.25052	3.42658e-07	1.98714e-05
ZNF285	ENSG00000267508	2.37716	1.24924	0.000151765	0.00222809
SCNN1B	ENSG00000168447	2.37667	1.24894	0.00728401	0.0422744
ZNF836	ENSG00000196267	2.3709	1.24544	9.51296e-06	0.000268951
ANKRD22	ENSG00000152766	2.37073	1.24533	7.03218e-08	5.64542e-06
RAB30	ENSG00000137502	2.36954	1.24461	2.06211e-05	0.000481196
PLAG1	ENSG00000181690	2.3678	1.24355	0.000762333	0.00756532
ZNF253	ENSG00000256771	2.36649	1.24275	0.00031027	0.00382329
BGN	ENSG00000182492	2.36336	1.24084	6.7566e-08	5.4856e-06
MAP2K6	ENSG00000108984	2.36302	1.24063	0.00357485	0.0246595
ZNF724	ENSG00000196081	2.35642	1.2366	1.6368e-05	0.00040618
TP73	ENSG00000078900	2.34821	1.23156	0.000864468	0.00830684
ZC3H6	ENSG00000188177	2.3401	1.22657	2.52944e-09	3.80566e-07
FKBP2	ENSG00000173486	2.33941	1.22614	0.00130964	0.0114901
ANKRD26	ENSG00000107890	2.33785	1.22518	9.56554e-07	4.50334e-05
NEBL	ENSG00000078114	2.33641	1.22429	6.66134e-16	5.97161e-13
TSC22D3	ENSG00000157514	2.33522	1.22356	1.09942e-10	2.54345e-08
CADM1	ENSG00000182985	2.33244	1.22184	0.00538856	0.0337412
SLCO2A1	ENSG00000174640	2.33144	1.22122	0.00523552	0.0330814
TSLP	ENSG00000145777	2.32917	1.21982	0.00085897	0.00826878
RPL34	ENSG00000109475	2.31583	1.21153	0	0
RORA	ENSG00000069667	2.31231	1.20933	0.000688048	0.00699048
KRCC1	ENSG00000172086	2.31184	1.20904	6.42753e-07	3.30044e-05
LGR6	ENSG00000133067	2.31046	1.20818	0.00394267	0.0265747
MARCH1	ENSG00000145416	2.3023	1.20308	0.00536898	0.0336872
FBXO48	ENSG00000204923	2.29952	1.20133	0.000191484	0.00262909
ZNF273	ENSG00000198039	2.29822	1.20051	0.000314642	0.00385775
H2BFS	ENSG00000234289	2.29416	1.19797	0.00306735	0.0219395
DMRTA1	ENSG00000176399	2.28782	1.19398	0.000374618	0.00440432
ZSCAN31	ENSG00000235109	2.28375	1.19141	0.000679632	0.00692671
HACD4	ENSG00000188921	2.28295	1.1909	0.000231088	0.00306149
FAM161A	ENSG00000170264	2.28063	1.18943	1.74913e-07	1.15084e-05
KIF27	ENSG00000165115	2.28039	1.18928	6.27192e-06	0.00019757
GNG11	ENSG00000127920	2.28	1.18904	0.00176117	0.0145234
SULF1	ENSG00000137573	2.2694	1.18231	0.00233651	0.018005
CEP126	ENSG00000110318	2.26917	1.18216	4.60311e-06	0.000155717
DEPTOR	ENSG00000155792	2.26895	1.18203	0.00377651	0.0257366
POU6F2	ENSG00000106536	2.26766	1.1812	0.000672128	0.00687302
PGAP1	ENSG00000197121	2.26608	1.1802	7.3376e-11	1.87939e-08
SYTL2	ENSG00000137501	2.26303	1.17825	0.000476536	0.00527536
TFCP2L1	ENSG00000115112	2.26198	1.17759	3.2685e-13	1.52873e-10
ZNF681	ENSG00000196172	2.25838	1.17529	0.00597735	0.0364107
GPR155	ENSG00000163328	2.254	1.17249	0.000539847	0.00581613
TCP11L2	ENSG00000166046	2.24973	1.16975	4.30161e-07	2.38528e-05
ATP5MD	ENSG00000173915	2.2342	1.15976	0	0
MIPOL1	ENSG00000151338	2.23243	1.15862	1.01102e-05	0.000282862
SFMBT2	ENSG00000198879	2.23202	1.15835	0.000275946	0.00349646
NDUFA1	ENSG00000125356	2.23172	1.15816	2.21283e-06	8.65618e-05
C2orf74	ENSG00000237651	2.23	1.15704	0.000380249	0.00445107
GASK1B	ENSG00000164125	2.22961	1.15679	0.000799975	0.00785457
AC091057.6	ENSG00000285077	2.22919	1.15652	0.00254108	0.0190931
SPATA6	ENSG00000132122	2.22608	1.1545	0.0064352	0.0384486
UGT1A6	ENSG00000167165	2.221	1.15121	4.98417e-09	6.45991e-07
CXADR	ENSG00000154639	2.22049	1.15088	2.05263e-10	4.37251e-08
CLHC1	ENSG00000162994	2.21941	1.15018	0.00052038	0.00566598
BMT2	ENSG00000164603	2.21388	1.14658	1.9811e-05	0.000467362
CEP162	ENSG00000135315	2.21365	1.14642	0.000381811	0.00446449
GLCCI1	ENSG00000106415	2.21257	1.14572	8.10337e-07	3.92926e-05
ATP10A	ENSG00000206190	2.21066	1.14448	0.00820933	0.0463823
AC008575.1	ENSG00000258864	2.20747	1.14239	0.0060822	0.0368823
RPL31	ENSG00000071082	2.20696	1.14206	5.55112e-16	5.68725e-13
ANKRD36C	ENSG00000174501	2.20504	1.14081	5.06881e-07	2.71282e-05
MT-CO3	ENSG00000198938	2.20412	1.1402	1.23617e-06	5.54087e-05
RPS27L	ENSG00000185088	2.20092	1.13811	5.23359e-13	2.39576e-10
ZBTB41	ENSG00000177888	2.19646	1.13518	3.18315e-06	0.00011549
MYZAP	ENSG00000263155	2.19335	1.13314	5.3557e-08	4.63865e-06
AKAP9	ENSG00000127914	2.1926	1.13264	1.88662e-06	7.6298e-05
LSM5	ENSG00000106355	2.18983	1.13082	4.87937e-11	1.34589e-08
MAML2	ENSG00000184384	2.18844	1.1299	3.45462e-05	0.000720913
VANGL2	ENSG00000162738	2.18569	1.12809	0.000622668	0.00648436
NMRK1	ENSG00000106733	2.18364	1.12673	0.000436302	0.00493754
CAMK4	ENSG00000152495	2.18162	1.1254	0.00347322	0.0241507
EAF2	ENSG00000145088	2.18076	1.12483	0.00755477	0.0434137
TMTC3	ENSG00000139324	2.17607	1.12173	4.7341e-09	6.26692e-07
KIAA1109	ENSG00000138688	2.17549	1.12134	3.57712e-11	9.99502e-09
WNT5A	ENSG00000114251	2.17467	1.1208	1.87111e-10	4.06635e-08
MLLT3	ENSG00000171843	2.17291	1.11963	2.51706e-07	1.56516e-05
ARRDC3	ENSG00000113369	2.17122	1.11851	2.15772e-12	8.75912e-10
DNAJB14	ENSG00000164031	2.16393	1.11365	1.8558e-07	1.2136e-05
CARF	ENSG00000138380	2.15972	1.11085	3.74104e-06	0.000130875
ZNF350	ENSG00000256683	2.15341	1.10662	0.00016801	0.00239227
C5	ENSG00000106804	2.14514	1.10107	6.02113e-08	5.00172e-06
ATM	ENSG00000149311	2.14489	1.10091	7.61113e-12	2.51929e-09
SCNN1G	ENSG00000166828	2.14299	1.09962	0.000112311	0.00176249
ESF1	ENSG00000089048	2.14163	1.09871	0.000423314	0.00483162
FAT4	ENSG00000196159	2.14015	1.09771	2.92177e-06	0.000107273
DPY19L3	ENSG00000178904	2.13389	1.09349	1.65189e-09	2.61327e-07
AC015813.2	ENSG00000266086	2.131	1.09153	0.000962981	0.00903162
ZNF606	ENSG00000166704	2.12607	1.08819	0.000221499	0.00295997
RAD51AP1	ENSG00000111247	2.12504	1.08749	1.02672e-06	4.72007e-05
CEP152	ENSG00000103995	2.12257	1.08581	7.45485e-08	5.85369e-06
CEP85L	ENSG00000111860	2.12035	1.0843	1.6119e-05	0.000400924
TIMP4	ENSG00000157150	2.11996	1.08404	0.00368004	0.0251992
TP53INP1	ENSG00000164938	2.1198	1.08393	6.2113e-06	0.000195948
LYST	ENSG00000143669	2.11937	1.08364	1.51363e-09	2.43028e-07
ATP7A	ENSG00000165240	2.11858	1.0831	1.14105e-06	5.19019e-05
PET100	ENSG00000229833	2.11159	1.07833	0.000101394	0.00164022
COX7C	ENSG00000127184	2.1115	1.07827	3.21965e-15	2.30902e-12
PIBF1	ENSG00000083535	2.10583	1.07439	0.000170007	0.00241114
ZNF443	ENSG00000180855	2.10501	1.07382	0.000331481	0.00401114
ZNF563	ENSG00000188868	2.10457	1.07352	0.00128834	0.0113599
TMEM61	ENSG00000143001	2.10252	1.07212	0.00652783	0.0388725
VPS13C	ENSG00000129003	2.10016	1.0705	1.03852e-09	1.77332e-07
DST	ENSG00000151914	2.09521	1.0671	1.0694e-08	1.21096e-06
CSPP1	ENSG00000104218	2.0937	1.06605	1.27455e-07	8.78905e-06
LPAR6	ENSG00000139679	2.09283	1.06546	5.57114e-05	0.00102975
UTRN	ENSG00000152818	2.09224	1.06505	1.66245e-12	7.01325e-10
CEP350	ENSG00000135837	2.08999	1.06349	2.27192e-10	4.76508e-08
ZNF214	ENSG00000149050	2.08646	1.06106	0.00325117	0.0229491
COX7B	ENSG00000131174	2.08197	1.05795	1.22125e-15	1.01058e-12
DISP1	ENSG00000154309	2.08182	1.05785	1.48582e-05	0.000374325
ZMAT3	ENSG00000172667	2.07399	1.05241	2.28122e-10	4.76508e-08
RGPD8	ENSG00000169629	2.0707	1.05012	0.00478143	0.0308741
FANCM	ENSG00000187790	2.07055	1.05002	7.05056e-07	3.54095e-05
SLC7A11	ENSG00000151012	2.0673	1.04774	4.44894e-09	5.94528e-07
PAPLN	ENSG00000100767	2.0659	1.04677	0.00169173	0.0140585
TTC14	ENSG00000163728	2.06575	1.04667	2.3113e-09	3.52678e-07
ZFP37	ENSG00000136866	2.06192	1.04399	1.66078e-05	0.000411182
SYCP2	ENSG00000196074	2.06096	1.04332	0.0055128	0.0343691
LEPR	ENSG00000116678	2.05929	1.04215	2.25901e-06	8.75841e-05
TMEM106B	ENSG00000106460	2.0579	1.04117	2.25684e-07	1.42812e-05
ING2	ENSG00000168556	2.05507	1.03919	0.00191987	0.0155052
C11orf74	ENSG00000166352	2.05327	1.03792	0.00097513	0.00913362
NGFR	ENSG00000064300	2.04974	1.03544	5.94174e-05	0.0010889
RRM2B	ENSG00000048392	2.04891	1.03485	9.16347e-09	1.05996e-06
ZNF260	ENSG00000254004	2.04756	1.03391	6.69789e-05	0.00118899
ZNF292	ENSG00000188994	2.04694	1.03347	1.0173e-07	7.3694e-06
ZNF654	ENSG00000175105	2.04679	1.03336	5.89212e-08	4.94537e-06
KBTBD3	ENSG00000182359	2.04593	1.03276	0.00209744	0.0165359
HMMR	ENSG00000072571	2.04397	1.03137	8.86592e-08	6.60945e-06
PADI3	ENSG00000142619	2.04153	1.02965	1.35427e-05	0.000350626
ABRAXAS1	ENSG00000163322	2.03879	1.02771	2.86584e-07	1.72231e-05
DZIP3	ENSG00000198919	2.03824	1.02733	7.98571e-06	0.000239627
CD302	ENSG00000241399	2.03706	1.02649	0.003107	0.0221495
KRT19	ENSG00000171345	2.03582	1.02561	5.27489e-12	1.77327e-09
MND1	ENSG00000121211	2.03512	1.02511	0.000102485	0.00164797
CETN3	ENSG00000153140	2.03159	1.02261	5.36723e-06	0.000175537
ARHGAP5	ENSG00000100852	2.03055	1.02187	9.66742e-09	1.10635e-06
ZNF248	ENSG00000198105	2.02714	1.01944	1.05501e-05	0.000292884
TRIQK	ENSG00000205133	2.02697	1.01933	1.22445e-05	0.000325236
ARID4A	ENSG00000032219	2.02444	1.01752	3.76368e-05	0.00077193
SUCO	ENSG00000094975	2.02	1.01435	2.87476e-08	2.74891e-06
FRK	ENSG00000111816	2.01956	1.01404	3.03826e-06	0.000110982
MT-CO1	ENSG00000198804	2.01925	1.01382	3.94929e-08	3.60038e-06
ZNF484	ENSG00000127081	2.01909	1.0137	3.25981e-08	3.06265e-06
ZNF678	ENSG00000181450	2.01858	1.01334	0.00309742	0.0221032
MANEA	ENSG00000172469	2.01692	1.01215	8.52441e-06	0.000250208
ZBED9	ENSG00000232040	2.01661	1.01194	8.0429e-06	0.000240672
VPS13A	ENSG00000197969	2.01577	1.01133	8.73272e-08	6.56939e-06
ZNF433	ENSG00000197647	2.0146	1.01049	0.000636198	0.006587
SLC2A10	ENSG00000197496	2.0142	1.01021	0.00321991	0.0227808
DCUN1D4	ENSG00000109184	2.01036	1.00745	9.98986e-10	1.71945e-07
LSM8	ENSG00000128534	2.00513	1.0037	4.37475e-08	3.88937e-06
DNAH5	ENSG00000039139	2.00355	1.00256	3.83154e-05	0.000783607
MAF	ENSG00000178573	2.00082	1.00059	0.00628148	0.0377192

## Sheet: DN (stiff vs native)
Supplementary data 1. DEGs in Wt-acini in stiff-BM versus native-BM
Gene Name	Ensembl Identifier	Fold change (FC ≤ - 2)	Log fold change	p value (p < 0.05)	FDR p value (p < 0.05)
HIST1H3D	ENSG00000197409	-1391.54	-10.4425	5.51401e-05	0.00102625
AC006064.6	ENSG00000285238	-833.098	-9.70234	0.000152584	0.0022343
AL121900.2	ENSG00000284776	-122.408	-6.93556	0.00598001	0.0364166
RNASEK-C17orf49	ENSG00000161939	-36.2893	-5.18147	0.000172097	0.00243757
MYO7B	ENSG00000169994	-13.0679	-3.70796	0.000630243	0.00654422
PRR9	ENSG00000203783	-11.8417	-3.56581	0.00760175	0.0436138
LCE3D	ENSG00000163202	-11.3844	-3.50899	1.55189e-07	1.04016e-05
ESM1	ENSG00000164283	-10.8789	-3.44346	1.45519e-05	0.000370076
AC105052.1	ENSG00000205236	-9.28124	-3.21432	0.000689974	0.00699896
CRCT1	ENSG00000169509	-9.26817	-3.21228	1.60207e-06	6.79854e-05
AC040162.1	ENSG00000261884	-8.61659	-3.10712	0.000719308	0.00723173
MUC16	ENSG00000181143	-7.83276	-2.96952	0.00854378	0.04775
CXCL1	ENSG00000163739	-7.73166	-2.95078	1.15346e-07	8.11002e-06
IL24	ENSG00000162892	-7.22388	-2.85277	0.00203846	0.0161776
BIVM-ERCC5	ENSG00000270181	-7.10977	-2.8298	0.00198541	0.0159091
FRMD3	ENSG00000172159	-6.93508	-2.79391	2.46464e-07	1.55049e-05
PRRX2	ENSG00000167157	-6.82838	-2.77154	0.00460823	0.030017
KRT75	ENSG00000170454	-6.49364	-2.69903	9.56356e-11	2.31191e-08
MRGPRX3	ENSG00000179826	-6.31525	-2.65884	2.33629e-08	2.28478e-06
GOLGA7B	ENSG00000155265	-5.76741	-2.52792	1.49541e-07	1.00858e-05
MMP3	ENSG00000149968	-5.69222	-2.50899	1.45268e-07	9.82844e-06
IL6	ENSG00000136244	-5.65927	-2.50062	0.00179484	0.0147165
MX2	ENSG00000183486	-5.65491	-2.49951	0.00205184	0.0162658
TBXA2R	ENSG00000006638	-5.62714	-2.4924	0.004608	0.030017
NDUFC2-KCTD14	ENSG00000259112	-5.5686	-2.47732	0.00625273	0.03763
ID2	ENSG00000115738	-5.37488	-2.42623	2.87474e-09	4.2363e-07
ALPP	ENSG00000163283	-5.35712	-2.42146	0.000636189	0.006587
AL133500.1	ENSG00000285547	-5.14521	-2.36323	0.00870629	0.048399
PI3	ENSG00000124102	-5.12898	-2.35867	0	0
HS3ST2	ENSG00000122254	-4.70266	-2.23348	1.42433e-05	0.000364381
CMPK2	ENSG00000134326	-4.66316	-2.22131	0.000169214	0.00240464
EFR3B	ENSG00000084710	-4.61113	-2.20512	7.14834e-10	1.3145e-07
KRT81	ENSG00000205426	-4.58609	-2.19726	0.00511427	0.0325446
SPRR2D	ENSG00000163216	-4.4702	-2.16034	2.1925e-06	8.62371e-05
CSF3	ENSG00000108342	-4.44178	-2.15114	1.98783e-08	2.03658e-06
IGFBP3	ENSG00000146674	-4.38201	-2.13159	0.00254014	0.0190931
IGFL1	ENSG00000188293	-4.34778	-2.12028	5.73776e-08	4.8411e-06
ID4	ENSG00000172201	-4.32101	-2.11137	0.00308693	0.0220356
KRT6B	ENSG00000185479	-4.24285	-2.08503	0	0
SERPINB2	ENSG00000197632	-4.12686	-2.04505	3.77476e-15	2.6198e-12
PPP2R2C	ENSG00000074211	-4.05442	-2.0195	6.21725e-15	4.05346e-12
IL1B	ENSG00000125538	-4.04052	-2.01454	0	0
ZNF320	ENSG00000182986	-3.95013	-1.9819	0.000378387	0.00443758
CXCL8	ENSG00000169429	-3.92609	-1.97309	1.73624e-07	1.14939e-05
CALML5	ENSG00000178372	-3.85192	-1.94558	0.00014267	0.00212426
MSX1	ENSG00000163132	-3.8109	-1.93013	0.0055848	0.0346177
INSC	ENSG00000188487	-3.65594	-1.87024	0.000499923	0.00547371
CSF2	ENSG00000164400	-3.61058	-1.85223	0.00353977	0.0244881
KANK4	ENSG00000132854	-3.58424	-1.84167	1.09538e-07	7.80368e-06
MMP1	ENSG00000196611	-3.51663	-1.81419	5.48104e-06	0.00017733
TNFAIP3	ENSG00000118503	-3.4453	-1.78463	0	0
AC129492.4	ENSG00000263620	-3.39631	-1.76397	7.15497e-06	0.000219913
CYP24A1	ENSG00000019186	-3.32769	-1.73452	1.50102e-13	7.51034e-11
HSH2D	ENSG00000196684	-3.31484	-1.72894	0.00870995	0.048399
NPR1	ENSG00000169418	-3.3011	-1.72295	0.000530599	0.00573084
ZNF365	ENSG00000138311	-3.22268	-1.68826	8.79283e-05	0.00146196
TMEM45B	ENSG00000151715	-3.21453	-1.68461	0.0030774	0.0219968
KLK10	ENSG00000129451	-3.21183	-1.68339	2.11666e-05	0.000490103
SNCB	ENSG00000074317	-3.20971	-1.68244	0.000454915	0.0050897
IVL	ENSG00000163207	-3.12077	-1.6419	0.000220317	0.00294783
C4orf36	ENSG00000163633	-3.11945	-1.64129	0.00273629	0.0200961
AC120114.4	ENSG00000281348	-3.08904	-1.62716	4.03725e-06	0.000139335
IFI6	ENSG00000126709	-3.07055	-1.6185	6.65583e-05	0.00118445
OAS1	ENSG00000089127	-3.04071	-1.60441	1.59418e-05	0.000398359
PRSS3	ENSG00000010438	-3.02882	-1.59876	0	0
CXCL2	ENSG00000081041	-2.98851	-1.57943	1.71448e-08	1.83104e-06
DUSP2	ENSG00000158050	-2.98401	-1.57725	5.7804e-07	3.01857e-05
HES5	ENSG00000197921	-2.88872	-1.53043	8.10767e-05	0.00138096
RGS16	ENSG00000143333	-2.86751	-1.5198	0.00202824	0.0161322
HEPHL1	ENSG00000181333	-2.86159	-1.51682	0.00358695	0.0247034
G0S2	ENSG00000123689	-2.83843	-1.5051	1.43091e-05	0.000365196
IL32	ENSG00000008517	-2.78815	-1.47931	0.000197874	0.00269788
MX1	ENSG00000157601	-2.78227	-1.47626	0.00032167	0.00392554
ZBED2	ENSG00000177494	-2.74953	-1.45919	0	0
KRT6C	ENSG00000170465	-2.73453	-1.45129	5.6246e-08	4.7643e-06
DUSP4	ENSG00000120875	-2.65118	-1.40664	6.66134e-16	5.97161e-13
GRAMD1B	ENSG00000023171	-2.63429	-1.39742	1.9472e-07	1.26568e-05
KIF12	ENSG00000136883	-2.58154	-1.36823	0.00633356	0.037989
FOXF2	ENSG00000137273	-2.57264	-1.36325	1.13133e-07	7.98049e-06
NCF2	ENSG00000116701	-2.56152	-1.357	0.000362374	0.00429795
FST	ENSG00000134363	-2.54221	-1.34608	1.04324e-07	7.50679e-06
AC026464.4	ENSG00000260914	-2.52987	-1.33906	1.78534e-08	1.87373e-06
DHRS2	ENSG00000100867	-2.50901	-1.32712	0.000366108	0.00431648
IL11	ENSG00000095752	-2.49432	-1.31865	0.000653001	0.00673505
CXCL3	ENSG00000163734	-2.46288	-1.30035	0.00173091	0.0143178
TMEM171	ENSG00000157111	-2.44026	-1.28703	0.000229715	0.00304705
SLC16A2	ENSG00000147100	-2.42665	-1.27897	0.000276298	0.00349839
INSYN2B	ENSG00000204767	-2.41207	-1.27027	1.05895e-05	0.0002931
ATAD3B	ENSG00000160072	-2.40344	-1.2651	2.9976e-15	2.30334e-12
DLX2	ENSG00000115844	-2.38536	-1.25421	4.64166e-08	4.09284e-06
NAV3	ENSG00000067798	-2.38126	-1.25172	3.70701e-09	5.17898e-07
PTHLH	ENSG00000087494	-2.38005	-1.25099	1.05164e-06	4.82431e-05
SULT2B1	ENSG00000088002	-2.37352	-1.24703	0.00814974	0.0461912
DDN	ENSG00000181418	-2.36442	-1.24149	7.45477e-08	5.85369e-06
SEMA7A	ENSG00000138623	-2.34305	-1.22839	2.66565e-10	5.46204e-08
FZD8	ENSG00000177283	-2.33097	-1.22093	5.72113e-10	1.07035e-07
NPIPA9	ENSG00000233024	-2.32319	-1.21611	0.000119028	0.00185303
SPRR1B	ENSG00000169469	-2.31885	-1.21341	0.000661266	0.00679749
EHF	ENSG00000135373	-2.31295	-1.20974	4.05366e-05	0.000813568
PLCB2	ENSG00000137841	-2.30763	-1.20641	0.00627061	0.037685
IRF9	ENSG00000213928	-2.30669	-1.20582	0.000118965	0.00185303
AC008012.1	ENSG00000285901	-2.25876	-1.17553	0.00179047	0.0146974
NIPAL4	ENSG00000172548	-2.25602	-1.17378	1.1727e-06	5.29312e-05
FOSL1	ENSG00000175592	-2.25029	-1.17011	1.30823e-05	0.000341584
ECM1	ENSG00000143369	-2.24661	-1.16775	1.21543e-11	3.83949e-09
MAPK8IP2	ENSG00000008735	-2.23773	-1.16204	1.97594e-05	0.000467168
SCO2_1	ENSG00000130489	-2.22052	-1.1509	3.94533e-07	2.23378e-05
ID1	ENSG00000125968	-2.2106	-1.14444	1.6873e-10	3.7425e-08
SNAI1	ENSG00000124216	-2.1858	-1.12816	0.00720875	0.0419179
SPHK1	ENSG00000176170	-2.18346	-1.12662	1.03175e-10	2.41283e-08
A2ML1	ENSG00000166535	-2.18088	-1.12491	0.00516726	0.0328219
OVOL1	ENSG00000172818	-2.17489	-1.12095	2.53182e-06	9.55651e-05
TGM1	ENSG00000092295	-2.17335	-1.11992	0.00143187	0.0123276
TGFA	ENSG00000163235	-2.17291	-1.11963	2.1025e-11	6.1966e-09
CARMIL2	ENSG00000159753	-2.16855	-1.11673	1.47249e-06	6.32348e-05
BIK	ENSG00000100290	-2.16677	-1.11555	0.00786277	0.0448168
OSBP2	ENSG00000184792	-2.16125	-1.11187	1.79706e-10	3.94528e-08
LGALS7B	ENSG00000178934	-2.14453	-1.10066	9.58741e-05	0.0015734
SMTN	ENSG00000183963	-2.14207	-1.099	7.24322e-11	1.87756e-08
FOXC2	ENSG00000176692	-2.1381	-1.09633	0.000880316	0.00842814
KRT6A	ENSG00000205420	-2.1289	-1.09011	0	0
PTGES	ENSG00000148344	-2.12544	-1.08776	3.49932e-10	6.78269e-08
CCDC86	ENSG00000110104	-2.11305	-1.07933	1.89364e-11	5.73827e-09
KBTBD11	ENSG00000176595	-2.10619	-1.07464	3.89843e-06	0.000135444
NRIP3	ENSG00000175352	-2.10253	-1.07212	0.000623437	0.00648924
SH2D5	ENSG00000189410	-2.09318	-1.06569	8.96925e-08	6.63139e-06
SH2D2A	ENSG00000027869	-2.09163	-1.06463	2.94345e-07	1.75912e-05
DUSP5	ENSG00000138166	-2.06951	-1.04929	7.15937e-11	1.87756e-08
RAPGEF3	ENSG00000079337	-2.06557	-1.04654	4.1829e-05	0.000833287
FAM89A	ENSG00000182118	-2.05936	-1.0422	8.75362e-06	0.000254826
NOS3	ENSG00000164867	-2.05254	-1.03741	0.00790765	0.0450326
GPR156	ENSG00000175697	-2.05131	-1.03655	0.00684262	0.0403031
GJB3	ENSG00000188910	-2.04471	-1.0319	1.25788e-13	6.57446e-11
MSX2	ENSG00000120149	-2.03783	-1.02703	3.73153e-05	0.000768266
SDCBP2	ENSG00000125775	-2.03482	-1.0249	3.20866e-09	4.60229e-07
SLPI	ENSG00000124107	-2.03193	-1.02285	8.19434e-10	1.4495e-07
FOSB	ENSG00000125740	-2.0234	-1.01678	1.19082e-07	8.31833e-06
FZD9	ENSG00000188763	-2.02221	-1.01593	0.00609452	0.0369259
MAFF	ENSG00000185022	-2.02073	-1.01488	7.42009e-10	1.33233e-07
CDC42EP2	ENSG00000149798	-2.01871	-1.01343	0.00259612	0.0193808
ODC1	ENSG00000115758	-2.00974	-1.00701	9.08607e-12	2.96192e-09
RABL2A	ENSG00000144134	-2.00643	-1.00463	0.00191478	0.0154757
FOXD1	ENSG00000251493	-2.00617	-1.00444	9.10559e-11	2.2518e-08
KLF7	ENSG00000118263	-2.00539	-1.00388	1.33978e-10	3.03424e-08
